# Supplementary material for: Rheumatoid arthritis continues to increase in low-middle SDI and low SDI quintiles based on GBD 1990–2021
Source: Research Square preprint supplement (doi:10.21203/rs.3.rs-7036091/v1), 2025-07-15
Supplement: Supplementary file 1 [file 342874874e19d1637d955894.xlsx]

## Sheet: ST3
Supplementary table 3. Frontier Analysis of ASPR, ASIR and ASDR in rheumatoid arthritis.
location	Prevalence						location	Incidence						location	DALYs
	2021 SDI	frontier	eff_diff	trend	rank_eff			2021 SDI	frontier	eff_diff	trend	rank_eff_ASR			2021 SDI	frontier	eff_diff	trend	rank_eff_ASR
Chad	0.243	41.28	7.6	Increase	1		Kiribati	0.532	2.06	0.38	Increase	1		Malaysia	0.742	5.54	2.51	Increase	1
Niger	0.167	41.28	9.34	Increase	2		Chad	0.243	2.28	0.6	Increase	2		Vanuatu	0.49	5.54	2.76	Increase	2
Kiribati	0.532	36.66	12.71	Increase	3		Mali	0.268	2.28	0.82	Increase	3		Nigeria	0.52	5.54	2.79	Increase	3
Malaysia	0.742	36.66	14.38	Increase	4		Malaysia	0.742	2.02	0.83	Increase	4		Gambia	0.404	5.54	3.14	Increase	4
Burkina Faso	0.262	41.28	17.81	Increase	5		Guinea	0.33	2.06	1.23	Increase	5		Tuvalu	0.594	5.54	3.65	Increase	5
Guinea-Bissau	0.36	39.72	18.16	Increase	6		Guinea-Bissau	0.36	2.06	1.29	Increase	6		Cameroon	0.495	5.54	4.32	Increase	6
Yemen	0.417	39.72	20.68	Increase	7		Solomon Islands	0.412	2.06	1.36	Increase	7		Sao Tome and Principe	0.507	5.54	4.5	Increase	7
Vanuatu	0.49	36.66	23.81	Increase	8		Seychelles	0.729	2.02	1.38	Increase	8		Tonga	0.641	5.54	4.66	Increase	8
Senegal	0.394	39.72	25.09	Increase	9		Cook Islands	0.769	2.02	1.56	Increase	9		Ethiopia	0.348	5.54	5.13	Decrease	9
C么te d'Ivoire	0.413	39.72	25.53	Increase	10		Tonga	0.641	2.02	1.67	Increase	10		Somalia	0.086	6	5.6	Decrease	10
Solomon Islands	0.412	39.72	27.63	Increase	11		C么te d'Ivoire	0.413	2.06	1.71	Increase	11		South Sudan	0.368	5.54	5.64	Increase	11
Seychelles	0.729	36.66	27.98	Increase	12		Ghana	0.562	2.05	1.74	Increase	12		American Samoa	0.717	5.54	6.01	Increase	12
Marshall Islands	0.549	36.66	30.09	Increase	13		Samoa	0.646	2.02	1.85	Increase	13		Eritrea	0.401	5.54	6.4	Increase	13
Tuvalu	0.594	36.66	30.56	Increase	14		Cabo Verde	0.53	2.06	1.89	Increase	14		Northern Mariana Islands	0.776	5.54	6.45	Increase	14
Ghana	0.562	36.66	31.16	Increase	15		Niue	0.716	2.02	1.97	Increase	15		Mozambique	0.312	5.54	6.6	Increase	15
Lao People's Democratic Republic	0.495	36.66	35.06	Increase	16		American Samoa	0.717	2.02	2.14	Increase	16		Algeria	0.657	5.54	7.03	Increase	16
Cabo Verde	0.53	36.66	35.79	Increase	17		Lao People's Democratic Republic	0.495	2.06	2.15	Increase	17		Djibouti	0.464	5.54	7.03	Increase	17
Cameroon	0.495	36.66	36.07	Increase	18		Northern Mariana Islands	0.776	2.02	2.24	Increase	18		Oman	0.788	5.54	7.14	Increase	18
Tonga	0.641	36.66	37.94	Increase	19		Turkmenistan	0.675	2.02	2.29	Increase	19		United Republic of Tanzania	0.428	5.54	7.58	Increase	19
Myanmar	0.526	36.66	39.75	Increase	20		Cambodia	0.474	2.06	2.34	Increase	20		Sudan	0.52	5.54	7.76	Increase	20
South Sudan	0.368	39.72	41.04	Increase	21		Myanmar	0.526	2.06	2.39	Increase	21		Central African Republic	0.279	5.78	8.13	Decrease	21
Nauru	0.623	36.66	45.96	Increase	22		Mauritania	0.501	2.06	2.48	Increase	22		Georgia	0.707	5.54	8.48	Increase	22
Turkmenistan	0.675	36.66	51.41	Increase	23		Libya	0.714	2.02	2.58	Increase	23		Saudi Arabia	0.81	5.54	9.02	Increase	23
Morocco	0.553	36.66	53.22	Increase	24		Somalia	0.086	2.5	2.64	Increase	24		Tunisia	0.677	5.54	9.27	Increase	24
Djibouti	0.464	36.66	54.29	Increase	25		Madagascar	0.401	2.06	2.66	Increase	25		Lao People's Democratic Republic	0.495	5.54	9.47	Increase	25
United Republic of Tanzania	0.428	39.72	55.78	Increase	26		Saudi Arabia	0.81	2.02	2.66	Increase	26		Guyana	0.623	5.54	9.82	Increase	26
Democratic Republic of the Congo	0.387	39.72	57.66	Increase	27		Eritrea	0.401	2.06	3.49	Increase	27		Angola	0.475	5.54	9.86	Increase	27
Saudi Arabia	0.81	36.66	59.27	Increase	28		Thailand	0.692	2.02	3.52	Increase	28		Jordan	0.736	5.54	10.08	Increase	28
Georgia	0.707	36.66	61.16	Increase	29		United Arab Emirates	0.885	2.02	3.61	Increase	29		Morocco	0.553	5.54	10.22	Increase	29
Dominican Republic	0.597	36.66	61.89	Increase	30		Maldives	0.567	2.05	3.64	Increase	30		Egypt	0.663	5.54	10.83	Increase	30
Rwanda	0.434	39.72	63.91	Increase	31		Central African Republic	0.279	2.28	3.69	Increase	31		Libya	0.714	5.54	10.84	Increase	31
Zimbabwe	0.481	36.66	66.52	Increase	32		Uganda	0.409	2.06	3.72	Increase	32		Armenia	0.694	5.54	11.78	Increase	32
Kazakhstan	0.728	36.66	68.04	Increase	33		Zambia	0.51	2.06	3.73	Increase	33		North Macedonia	0.749	5.54	11.94	Increase	33
Maldives	0.567	36.66	68.34	Increase	34		Malawi	0.389	2.06	3.88	Increase	34		Bulgaria	0.769	5.54	12.45	Increase	34
Grenada	0.674	36.66	71.15	Increase	35		Democratic Republic of the Congo	0.387	2.06	3.89	Increase	35		Mauritius	0.71	5.54	13.45	Increase	35
Jordan	0.736	36.66	73.01	Increase	36		Grenada	0.674	2.02	3.97	Increase	36		Congo	0.573	5.54	14.48	Increase	36
Armenia	0.694	36.66	78.16	Increase	37		Qatar	0.835	2.02	3.99	Increase	37		Dominican Republic	0.597	5.54	14.59	Decrease	37
Bulgaria	0.769	36.66	86.64	Increase	38		Republic of Moldova	0.701	2.02	4.06	Increase	38		Viet Nam	0.622	5.54	14.78	Increase	38
Republic of Moldova	0.701	36.66	88.06	Increase	39		Belarus	0.75	2.02	4.3	Increase	39		Slovakia	0.817	5.54	15.93	Increase	39
Jamaica	0.689	36.66	92.77	Increase	40		Romania	0.765	2.02	4.71	Increase	40		Gabon	0.661	5.54	17.07	Increase	40
Romania	0.765	36.66	93.91	Increase	41		Viet Nam	0.622	2.02	4.97	Increase	41		San Marino	0.889	5.54	17.65	Increase	41
Slovakia	0.817	36.66	101.45	Increase	42		Slovakia	0.817	2.02	5.06	Increase	42		Andorra	0.899	5.54	17.77	Increase	42
Belize	0.608	36.66	119.13	Increase	43		Lebanon	0.713	2.02	5.1	Increase	43		Jamaica	0.689	5.54	18.07	Increase	43
Montenegro	0.796	36.66	125.21	Increase	44		Jamaica	0.689	2.02	5.33	Increase	44		Montenegro	0.796	5.54	19.43	Increase	44
San Marino	0.889	36.66	125.73	Increase	45		United States Virgin Islands	0.804	2.02	5.44	Increase	45		Czechia	0.833	5.54	21.97	Increase	45
Lebanon	0.713	36.66	125.82	Increase	46		Tajikistan	0.544	2.05	5.91	Increase	46		Antigua and Barbuda	0.748	5.54	22.14	Increase	46
Serbia	0.772	36.66	130.67	Increase	47		Dominica	0.734	2.02	6.13	Increase	47		Brazil	0.645	5.54	22.55	Decrease	47
Lesotho	0.512	36.66	133.02	Increase	48		Montenegro	0.796	2.02	6.53	Increase	48		Bahamas	0.801	5.54	23.06	Increase	48
Monaco	0.907	36.66	134.24	Increase	49		Equatorial Guinea	0.69	2.02	7.02	Increase	49		Bermuda	0.818	5.54	23.33	Increase	49
Pakistan	0.454	39.72	135.57	Decrease	50		Antigua and Barbuda	0.748	2.02	7.14	Increase	50		Taiwan (Province of China)	0.873	5.54	23.38	Decrease	50
Bermuda	0.818	36.66	143.32	Increase	51		Namibia	0.617	2.02	7.17	Increase	51		Belize	0.608	5.54	23.52	Increase	51
Czechia	0.833	36.66	150.11	Increase	52		Pakistan	0.454	2.06	7.31	Decrease	52		Saint Lucia	0.675	5.54	25.02	Increase	52
Guatemala	0.531	36.66	159.95	Increase	53		Czechia	0.833	2.02	7.33	Increase	53		Bahrain	0.756	5.54	26.26	Increase	53
Russian Federation	0.81	36.66	163.31	Increase	54		Bahrain	0.756	2.02	7.82	Increase	54		Panama	0.691	5.54	27.5	Increase	54
Bhutan	0.46	39.72	171.63	Increase	55		Gabon	0.661	2.02	7.84	Increase	55		France	0.839	5.54	27.89	Decrease	55
Trinidad and Tobago	0.762	36.66	172.55	Increase	56		Botswana	0.639	2.02	8.12	Increase	56		Luxembourg	0.9	5.54	29.68	Decrease	56
Democratic People's Republic of Korea	0.563	36.66	173.23	Increase	57		Saint Kitts and Nevis	0.751	2.02	8.14	Increase	57		Germany	0.903	5.54	30.5	Increase	57
India	0.571	36.66	179.44	Increase	58		Taiwan (Province of China)	0.873	2.02	8.46	Increase	58		Hungary	0.796	5.54	30.93	Decrease	58
Malta	0.806	36.66	190.84	Increase	59		Bermuda	0.818	2.02	8.69	Increase	59		Bosnia and Herzegovina	0.723	5.54	31.62	Increase	59
Hungary	0.796	36.66	191.72	Increase	60		Eswatini	0.582	2.05	8.74	Increase	60		Argentina	0.713	5.54	31.65	Increase	60
Kuwait	0.856	36.66	200.61	Increase	61		Kuwait	0.856	2.02	8.79	Increase	61		Guatemala	0.531	5.54	33.13	Increase	61
Republic of Korea	0.883	36.66	201.01	Increase	62		Nepal	0.427	2.06	9.83	Increase	62		Belgium	0.856	5.54	34.35	Increase	62
Germany	0.903	36.66	201.05	Increase	63		Greece	0.799	2.02	9.95	Increase	63		Austria	0.854	5.54	34.77	Decrease	63
China	0.691	36.66	204.04	Increase	64		Colombia	0.638	2.02	11.16	Increase	64		Iceland	0.874	5.54	35.62	Increase	64
Bosnia and Herzegovina	0.723	36.66	212.47	Increase	65		Poland	0.807	2.02	11.34	Decrease	65		Poland	0.807	5.54	36.34	Decrease	65
Belgium	0.856	36.66	227.07	Increase	66		Germany	0.903	2.02	11.38	Increase	66		Eswatini	0.582	5.54	37.21	Decrease	66
Latvia	0.825	36.66	229.1	Increase	67		Uzbekistan	0.636	2.02	12.01	Increase	67		Colombia	0.638	5.54	37.53	Increase	67
Austria	0.854	36.66	234.98	Increase	68		Republic of Korea	0.883	2.02	12.33	Increase	68		Uzbekistan	0.636	5.54	39.46	Increase	68
Portugal	0.748	36.66	235.51	Increase	69		Croatia	0.799	2.02	12.48	Increase	69		Japan	0.875	5.54	40.24	Decrease	69
Venezuela (Bolivarian Republic of)	0.612	36.66	281.45	Increase	70		India	0.571	2.05	12.77	Increase	70		Ecuador	0.645	5.54	50.23	Increase	70
Denmark	0.895	36.66	321.32	Increase	71		Italy	0.806	2.02	12.82	Increase	71		Denmark	0.895	5.54	50.4	Increase	71
Netherlands	0.888	36.66	338.53	Increase	72		Bolivia (Plurinational State of)	0.571	2.05	15.18	Increase	72		Bolivia (Plurinational State of)	0.571	5.54	51.79	Increase	72
Cyprus	0.846	36.66	343.85	Increase	73		Ecuador	0.645	2.02	17.38	Increase	73		Costa Rica	0.685	5.54	56.46	Increase	73
New Zealand	0.845	36.66	359.16	Decrease	74		Canada	0.878	2.02	18.72	Increase	74		Estonia	0.84	5.54	58.73	Increase	74
							Honduras	0.501	2.06	18.87	Increase	75		Peru	0.653	5.54	71.85	Increase	75
							Chile	0.764	2.02	19.62	Increase	76		Honduras	0.501	5.54	75.89	Increase	76
							Netherlands	0.888	2.02	22.33	Increase	77
							Cyprus	0.846	2.02	22.56	Increase	78
SDI: sociodemographic index; eff_diff: effective difference; rank_eff_ASR: Ranking of effective differences in age-standardised rates.
