# Supplementary material for: Rheumatoid arthritis continues to increase in low-middle SDI and low SDI quintiles based on GBD 1990–2021
Source: Research Square preprint supplement (doi:10.21203/rs.3.rs-7036091/v1), 2025-07-15
Supplement: Supplementary file 2 [file 36ecf5c13562be1bbf557117.xlsx]

## Sheet: ST1
Supplementary table 2. A summary of the number of cases, incidence, death, DALYs, ASRs and EAPC of rheumatoid arthritis at global, country, regional, age and sex levels.
Objectives		Prevalence						Incidence						Deaths						DALYs
		Num_1990	ASR_1990	Num_2021	ASR_2021	EAPC_CI		Num_1990	ASR_1990	Num_2021	ASR_2021	EAPC_CI		Num_1990	ASR_1990	Num_2021	ASR_2021	EAPC_CI		Num_1990	ASR_1990	Num_2021	ASR_2021	EAPC_CI
Global		7959055 (7041419-9085469)	182.54 (161.59-207.48)	17924667 (15973178-20303303)	208.9 (186.34-236.33)	0.53 (0.5-0.57)		488269 (435015-545895)	10.42 (9.32-11.64)	1000319 (902687-1114213)	11.8 (10.64-13.12)	0.49 (0.46-0.52)		21671 (19287-24202)	0.61 (0.54-0.68)	37330 (31060-43136)	0.45 (0.37-0.52)	-0.87 (-0.96--0.79)		1545699 (1201479-1977786)	36.42 (28.71-46)	3075303 (2310381-3974046)	35.89 (26.95-46.46)	0.05 (0.01-0.1)
Female		5831179 (5172111-6619855)	257.98 (229.32-292.43)	12975146 (11647165-14611571)	293.66 (263.52-331.33)	0.52 (0.48-0.55)		345056 (308045-383142)	14.43 (12.95-16.01)	695501 (628227-772973)	16.23 (14.65-18)	0.46 (0.43-0.49)		15561 (13751-17702)	0.76 (0.67-0.87)	25117 (21173-30193)	0.54 (0.45-0.65)	-1.02 (-1.11--0.94)		1116984 (868858-1429524)	50.02 (39.24-63.67)	2177017 (1627793-2845902)	48.93 (36.37-64.28)	0.03 (-0.02-0.07)
Male		2127876 (1840229-2485571)	101.91 (89.65-117.83)	4949521 (4369799-5705323)	119.68 (105.95-137.45)	0.61 (0.58-0.64)		143213 (126005-162933)	6.39 (5.66-7.22)	304818 (272328-342831)	7.33 (6.56-8.26)	0.53 (0.5-0.56)		6111 (4510-7011)	0.41 (0.3-0.47)	12214 (7882-14582)	0.34 (0.22-0.4)	-0.46 (-0.55--0.37)		428715 (331464-558067)	21.57 (16.88-27.54)	898287 (684568-1168744)	22.06 (16.91-28.53)	0.18 (0.13-0.22)
5-9 years		7125 (3408-12257)	1.22 (0.58-2.1)	9150 (4289-15648)	1.33 (0.62-2.28)	0.4 (0.36-0.44)		4279 (2049-7352)	0.73 (0.35-1.26)	5495 (2589-9386)	0.8 (0.38-1.37)	0.4 (0.36-0.44)		47 (39-59)	0.01 (0.01-0.01)	14 (12-18)	0 (0-0)	-4.02 (-4.14--3.9)		4906 (4042-6198)	0.84 (0.69-1.06)	2524 (1735-3832)	0.37 (0.25-0.56)	-2.46 (-2.57--2.35)
10-14 years		47416 (29452-72970)	8.85 (5.5-13.62)	65643 (41442-99406)	9.85 (6.22-14.91)	0.46 (0.42-0.5)		13381 (8701-18236)	2.5 (1.62-3.4)	19005 (12659-25878)	2.85 (1.9-3.88)	0.5 (0.48-0.53)		57 (48-71)	0.01 (0.01-0.01)	24 (19-30)	0 (0-0)	-3.12 (-3.26--2.98)		11359 (7883-16503)	2.12 (1.47-3.08)	11464 (6936-18700)	1.72 (1.04-2.81)	-0.49 (-0.56--0.42)
15-19 years		134681 (88770-185164)	25.93 (17.09-35.65)	182782 (122075-252470)	29.29 (19.56-40.46)	0.53 (0.49-0.58)		23991 (14156-37259)	4.62 (2.73-7.17)	33352 (19946-50728)	5.34 (3.2-8.13)	0.58 (0.54-0.62)		84 (69-105)	0.02 (0.01-0.02)	38 (30-48)	0.01 (0-0.01)	-2.88 (-3.08--2.69)		25671 (17023-37325)	4.94 (3.28-7.19)	29231 (17921-45448)	4.68 (2.87-7.28)	0 (-0.07-0.06)
20-24 years		257926 (174609-361662)	52.41 (35.48-73.5)	359830 (248461-500290)	60.26 (41.61-83.78)	0.61 (0.56-0.65)		32846 (22135-45461)	6.67 (4.5-9.24)	45465 (31046-61848)	7.61 (5.2-10.36)	0.56 (0.51-0.61)		97 (78-120)	0.02 (0.02-0.02)	47 (38-62)	0.01 (0.01-0.01)	-2.63 (-2.86--2.4)		43544 (27171-65446)	8.85 (5.52-13.3)	54520 (32420-84181)	9.13 (5.43-14.1)	0.28 (0.22-0.34)
25-29 years		381229 (273410-506745)	86.13 (61.77-114.49)	589491 (427870-776598)	100.2 (72.72-132)	0.61 (0.57-0.65)		37887 (22720-57383)	8.56 (5.13-12.96)	56415 (35460-83841)	9.59 (6.03-14.25)	0.47 (0.43-0.52)		118 (98-144)	0.03 (0.02-0.03)	72 (58-89)	0.01 (0.01-0.02)	-2.26 (-2.52--2)		61064 (40255-90341)	13.8 (9.09-20.41)	87171 (54855-132895)	14.82 (9.32-22.59)	0.37 (0.32-0.42)
30-34 years		485269 (369629-651219)	125.91 (95.9-168.96)	901929 (683038-1196067)	149.21 (113-197.87)	0.59 (0.57-0.62)		40544 (25970-57170)	10.52 (6.74-14.83)	71424 (45150-99440)	11.82 (7.47-16.45)	0.4 (0.38-0.43)		160 (135-190)	0.04 (0.04-0.05)	124 (102-152)	0.02 (0.02-0.03)	-2.11 (-2.39--1.83)		76717 (51722-113745)	19.9 (13.42-29.51)	132344 (88443-200572)	21.89 (14.63-33.18)	0.37 (0.34-0.41)
35-39 years		621931 (470862-804708)	176.56 (133.67-228.45)	1134995 (873493-1457970)	202.36 (155.74-259.95)	0.52 (0.48-0.56)		45780 (26511-66287)	13 (7.53-18.82)	77834 (46347-111145)	13.88 (8.26-19.82)	0.28 (0.24-0.33)		248 (210-291)	0.07 (0.06-0.08)	194 (159-229)	0.03 (0.03-0.04)	-2.08 (-2.37--1.8)		98902 (66568-142574)	28.08 (18.9-40.48)	166283 (109963-245313)	29.65 (19.61-43.74)	0.27 (0.21-0.33)
40-44 years		669391 (514001-835496)	233.66 (179.42-291.64)	1313109 (1024531-1620788)	262.49 (204.8-324)	0.5 (0.45-0.55)		43377 (26425-61600)	15.14 (9.22-21.5)	78799 (48796-110383)	15.75 (9.75-22.07)	0.26 (0.2-0.32)		330 (286-382)	0.12 (0.1-0.13)	310 (261-363)	0.06 (0.05-0.07)	-1.82 (-2.04--1.59)		107070 (72366-153006)	37.37 (25.26-53.41)	193628 (125509-281449)	38.71 (25.09-56.26)	0.25 (0.19-0.32)
45-49 years		680330 (532138-847527)	293 (229.18-365.01)	1587898 (1259939-1948963)	335.35 (266.09-411.6)	0.52 (0.48-0.55)		39170 (24903-58736)	16.87 (10.72-25.3)	84451 (54570-124920)	17.84 (11.52-26.38)	0.24 (0.2-0.28)		471 (411-548)	0.2 (0.18-0.24)	565 (475-654)	0.12 (0.1-0.14)	-1.54 (-1.71--1.38)		112132 (78061-155791)	48.29 (33.62-67.09)	238479 (160977-337569)	50.36 (34-71.29)	0.23 (0.19-0.27)
50-54 years		771772 (625356-933806)	363.06 (294.19-439.29)	1849034 (1502674-2227738)	415.59 (337.74-500.7)	0.51 (0.49-0.53)		40842 (27465-57335)	19.21 (12.92-26.97)	93797 (62738-131785)	21.08 (14.1-29.62)	0.31 (0.28-0.33)		817 (726-926)	0.38 (0.34-0.44)	996 (851-1128)	0.22 (0.19-0.25)	-1.64 (-1.84--1.43)		134585 (98383-181617)	63.31 (46.28-85.44)	285448 (198999-396235)	64.16 (44.73-89.06)	0.13 (0.08-0.18)
55-59 years		827686 (696407-984390)	446.92 (376.03-531.53)	2011671 (1700393-2377348)	508.35 (429.69-600.75)	0.5 (0.45-0.56)		42227 (27098-61906)	22.8 (14.63-33.43)	99992 (64450-144600)	25.27 (16.29-36.54)	0.41 (0.35-0.47)		1327 (1179-1489)	0.72 (0.64-0.8)	1746 (1482-1987)	0.44 (0.37-0.5)	-1.58 (-1.69--1.46)		153960 (118887-198988)	83.13 (64.19-107.45)	324334 (240042-431812)	81.96 (60.66-109.12)	0.02 (-0.04-0.08)
60-64 years		870118 (745800-1024432)	541.76 (464.36-637.84)	1948105 (1678737-2265243)	608.69 (524.53-707.78)	0.53 (0.46-0.6)		41721 (25981-61656)	25.98 (16.18-38.39)	98434 (62903-141685)	30.76 (19.65-44.27)	0.67 (0.57-0.76)		2217 (1973-2511)	1.38 (1.23-1.56)	2782 (2375-3246)	0.87 (0.74-1.01)	-1.43 (-1.51--1.34)		177617 (140207-223033)	110.59 (87.3-138.87)	333859 (251419-438473)	104.32 (78.56-137)	-0.06 (-0.13-0)
65-69 years		802512 (687002-942253)	649.23 (555.78-762.28)	1997899 (1722725-2323991)	724.29 (624.53-842.51)	0.56 (0.49-0.64)		34965 (21926-48512)	28.29 (17.74-39.25)	95800 (62225-131039)	34.73 (22.56-47.51)	0.92 (0.83-1.01)		3020 (2675-3408)	2.44 (2.16-2.76)	4486 (3753-5260)	1.63 (1.36-1.91)	-1.27 (-1.37--1.16)		176354 (142487-216488)	142.67 (115.27-175.14)	364307 (285629-466155)	132.07 (103.55-168.99)	-0.1 (-0.15--0.04)
70-74 years		591208 (512998-684296)	698.32 (605.94-808.28)	1659306 (1447190-1907391)	806.12 (703.07-926.64)	0.57 (0.5-0.63)		23075 (14059-34231)	27.26 (16.61-40.43)	70639 (43927-102813)	34.32 (21.34-49.95)	0.85 (0.78-0.92)		3373 (2952-3870)	3.98 (3.49-4.57)	5857 (4828-6760)	2.85 (2.35-3.28)	-1.06 (-1.14--0.97)		141813 (116981-170564)	167.51 (138.18-201.47)	324954 (258607-404088)	157.87 (125.64-196.31)	-0.12 (-0.17--0.07)
75-79 years		437817 (385535-498469)	711.26 (626.32-809.79)	1102840 (971035-1250100)	836.22 (736.28-947.88)	0.5 (0.47-0.53)		14752 (10597-19135)	23.97 (17.21-31.09)	39832 (29225-51489)	30.2 (22.16-39.04)	0.62 (0.58-0.67)		3836 (3405-4263)	6.23 (5.53-6.93)	6400 (5349-7239)	4.85 (4.06-5.49)	-0.81 (-0.88--0.74)		115206 (96281-136018)	187.16 (156.41-220.97)	237385 (193733-285198)	179.99 (146.9-216.25)	-0.14 (-0.18--0.1)
80-84 years		246421 (218806-275806)	696.58 (618.52-779.64)	708714 (632281-793786)	809.19 (721.92-906.32)	0.48 (0.44-0.52)		6964 (4712-9445)	19.69 (13.32-26.7)	20359 (13724-27958)	23.25 (15.67-31.92)	0.49 (0.41-0.56)		2815 (2388-3185)	7.96 (6.75-9)	5934 (4662-6928)	6.78 (5.32-7.91)	-0.4 (-0.48--0.33)		64837 (54457-75285)	183.28 (153.94-212.81)	158972 (128792-188500)	181.51 (147.05-215.22)	0.03 (-0.03-0.08)
85-89 years		97274 (87066-108402)	643.72 (576.17-717.37)	350081 (314330-390471)	765.68 (687.48-854.01)	0.56 (0.48-0.65)		2104 (1427-2852)	13.92 (9.44-18.87)	7470 (5055-10215)	16.34 (11.06-22.34)	0.42 (0.33-0.5)		1851 (1546-2129)	12.25 (10.23-14.09)	4646 (3590-5545)	10.16 (7.85-12.13)	-0.35 (-0.51--0.19)		29815 (25572-34372)	197.31 (169.22-227.46)	86887 (71746-102207)	190.03 (156.92-223.54)	0.03 (-0.07-0.13)
90-94 years		24360 (21788-27306)	568.47 (508.45-637.21)	121384 (108995-135528)	678.53 (609.27-757.59)	0.68 (0.56-0.79)		344 (232-466)	8.02 (5.42-10.88)	1636 (1104-2228)	9.14 (6.17-12.45)	0.43 (0.31-0.55)		637 (507-733)	14.86 (11.84-17.12)	2279 (1716-2648)	12.74 (9.59-14.8)	-0.14 (-0.27-0)		8289 (7033-9483)	193.43 (164.12-221.31)	33483 (27682-38707)	187.17 (154.74-216.37)	0.17 (0.06-0.27)
95+ years		4589 (4038-5221)	450.76 (396.67-512.86)	30808 (27245-35052)	565.25 (499.87-643.11)	0.79 (0.69-0.89)		20 (13-27)	1.95 (1.31-2.64)	121 (82-165)	2.22 (1.5-3.02)	0.45 (0.35-0.56)		165 (127-191)	16.23 (12.5-18.74)	817 (588-947)	15 (10.79-17.37)	0.06 (-0.06-0.18)		1859 (1536-2129)	182.63 (150.83-209.15)	10031 (8232-11629)	184.05 (151.04-213.37)	0.25 (0.17-0.34)
High-middle SDI		1808941 (1580264-2082422)	172.09 (150.29-197.2)	3839358 (3402908-4364606)	213.28 (188.45-242.99)	0.76 (0.73-0.78)		101601 (89922-114554)	9.36 (8.29-10.55)	190166 (169306-213515)	11.66 (10.43-12.97)	0.77 (0.75-0.8)		3997 (3608-4466)	0.43 (0.38-0.47)	7074 (5925-8099)	0.36 (0.3-0.42)	-0.48 (-0.65--0.32)		341824 (262365-440687)	32.83 (25.33-42.18)	646310 (482517-842256)	35.53 (26.33-46.93)	0.31 (0.26-0.35)
High SDI		2763440 (2503601-3084589)	263.15 (238.33-294.74)	4823674 (4405653-5320056)	282.73 (256.44-313.88)	0.37 (0.3-0.44)		159835 (144136-177741)	15.87 (14.3-17.64)	255315 (231186-282039)	16.88 (15.44-18.47)	0.33 (0.26-0.4)		8482 (7848-8819)	0.75 (0.69-0.78)	9092 (7862-9805)	0.39 (0.34-0.41)	-2.2 (-2.33--2.06)		527813 (416182-657888)	49.57 (38.84-62.18)	774616 (579737-998733)	44.15 (32.56-58.11)	-0.27 (-0.31--0.22)
Low-middle SDI		916740 (791756-1076101)	121.21 (105.91-140.23)	2731071 (2419932-3150263)	168.37 (149.42-192.37)	1.19 (1.12-1.27)		65828 (57842-75284)	7.88 (6.97-8.93)	180057 (160663-202101)	10.49 (9.36-11.78)	1.03 (0.98-1.08)		3206 (2292-4496)	0.66 (0.47-0.96)	7841 (5876-10928)	0.65 (0.48-0.93)	0.04 (-0.07-0.15)		191716 (147098-243412)	28.29 (21.91-35.62)	513042 (391548-655665)	33.46 (26.23-41.97)	0.64 (0.59-0.68)
Low SDI		249338 (210983-297106)	86.9 (75.82-101.16)	726534 (623789-855562)	110.98 (98.21-127.44)	0.89 (0.78-1.01)		18210 (15885-20960)	5.63 (4.99-6.39)	52398 (46046-59971)	7.04 (6.27-7.92)	0.83 (0.73-0.92)		607 (396-1137)	0.36 (0.23-0.67)	1377 (942-2352)	0.36 (0.24-0.61)	0.29 (0.08-0.5)		46708 (34548-63141)	17.99 (13.64-24.07)	125255 (90153-167106)	20.81 (15.75-27.17)	0.6 (0.51-0.7)
Middle SDI		2213897 (1907145-2562915)	171.71 (150.6-197.15)	5792479 (5116784-6613510)	209.61 (185.51-238.44)	0.72 (0.69-0.75)		142436 (124527-161709)	9.72 (8.61-10.95)	321824 (287295-361682)	11.9 (10.67-13.38)	0.71 (0.69-0.74)		5358 (4439-6220)	0.64 (0.53-0.73)	11925 (9425-13715)	0.5 (0.39-0.57)	-0.6 (-0.79--0.42)		436281 (333576-564843)	35.87 (28.4-45.57)	1014159 (761009-1317131)	37.22 (28.13-48.12)	0.24 (0.17-0.3)
Advanced Health System		3560060 (3222698-3990355)	228.65 (206.99-255.88)	6076794 (5543846-6694618)	261.43 (237.65-290.12)	0.56 (0.49-0.62)		199096 (179351-221025)	13.31 (12.04-14.74)	311369 (282848-342716)	15.17 (13.88-16.58)	0.54 (0.48-0.61)		10413 (9699-10826)	0.64 (0.59-0.66)	11537 (10093-12391)	0.37 (0.33-0.4)	-1.88 (-2.04--1.72)		681845 (536163-853554)	43.33 (33.95-54.52)	989350 (748126-1275106)	41.5 (30.82-54.45)	-0.07 (-0.1--0.04)
Africa		323703 (275928-378854)	84.29 (73.37-97)	877453 (746975-1028427)	95.41 (82.96-110.06)	0.43 (0.36-0.5)		21583 (18724-24762)	4.65 (4.12-5.22)	55753 (48262-63475)	5.13 (4.55-5.74)	0.36 (0.27-0.44)		348 (252-670)	0.14 (0.1-0.27)	596 (465-1060)	0.11 (0.08-0.19)	-1.32 (-1.66--0.98)		54373 (39347-73669)	14.48 (10.71-19.25)	134209 (93861-187574)	14.93 (10.68-20.43)	0.04 (0-0.08)
African Region		268439 (229889-312337)	90.2 (78.93-103.52)	687190 (587964-802917)	95.82 (83.67-110.25)	0.24 (0.17-0.3)		18224 (15817-20829)	5.07 (4.51-5.67)	45461 (39299-51774)	5.32 (4.74-5.96)	0.2 (0.12-0.29)		300 (215-613)	0.16 (0.11-0.31)	469 (372-920)	0.11 (0.09-0.21)	-1.72 (-2.12--1.31)		45343 (32962-60410)	15.56 (11.56-20.81)	104824 (73438-146922)	14.97 (10.77-20.38)	-0.22 (-0.27--0.17)
America		1512404 (1379759-1676208)	236.72 (216.36-261.6)	3598203 (3287928-3952313)	290.57 (265.03-320.43)	0.81 (0.76-0.86)		90840 (82150-99645)	13.66 (12.41-14.97)	193288 (176570-211146)	16.46 (14.99-17.96)	0.72 (0.66-0.77)		3721 (3475-3860)	0.62 (0.58-0.64)	6488 (5846-7063)	0.48 (0.43-0.52)	-0.87 (-1.11--0.63)		279962 (215706-354594)	44.14 (34.17-55.73)	601497 (455527-772391)	48.14 (36.25-62.12)	0.39 (0.31-0.46)
Andean Latin America		71325 (62142-81083)	261.9 (231.95-294.69)	279947 (247543-315605)	432.76 (384.44-486.44)	1.76 (1.69-1.82)		4413 (3873-4943)	13.57 (12.25-15.03)	14555 (13019-16096)	21.72 (19.62-23.94)	1.62 (1.57-1.67)		162 (132-191)	0.93 (0.75-1.1)	328 (269-400)	0.58 (0.48-0.72)	-1.91 (-2.18--1.63)		12849 (9599-16597)	50.58 (39.15-63.49)	43359 (30922-57568)	67.82 (48.77-89.56)	0.95 (0.87-1.03)
Asia		4105649 (3549242-4782675)	172.14 (149.78-198.32)	10314595 (9052293-11885118)	200.44 (176.23-230.06)	0.59 (0.55-0.64)		268868 (236104-304611)	10.16 (8.93-11.51)	597534 (529857-674176)	11.7 (10.41-13.22)	0.54 (0.5-0.57)		11214 (9288-13451)	0.67 (0.55-0.81)	24280 (18848-29504)	0.52 (0.41-0.64)	-0.61 (-0.74--0.49)		813447 (622468-1051828)	36.08 (28.31-45.76)	1822196 (1369807-2357965)	35.81 (27.05-46.23)	0.1 (0.04-0.16)
Australasia		72652 (64699-81964)	313.85 (278.08-355.84)	165014 (146786-185053)	354.82 (312.15-402.78)	0.47 (0.34-0.61)		4645 (4172-5142)	20.63 (18.5-22.93)	9766 (8711-10894)	23.01 (20.53-25.58)	0.43 (0.29-0.57)		225 (204-242)	0.95 (0.86-1.02)	290 (245-326)	0.49 (0.41-0.55)	-2.13 (-2.32--1.94)		13697 (10693-17121)	58.64 (45.59-74.03)	26017 (19300-33688)	54.8 (39.98-72.57)	-0.14 (-0.21--0.07)
Basic Health System		3108312 (2679414-3608895)	172.22 (150.25-198.58)	7693988 (6785213-8828392)	204.97 (180.53-234.13)	0.64 (0.62-0.67)		194099 (169151-220323)	9.53 (8.44-10.77)	400775 (356937-451051)	11.21 (10.02-12.58)	0.59 (0.57-0.61)		7079 (6033-8285)	0.57 (0.49-0.66)	15348 (12078-17797)	0.46 (0.36-0.53)	-0.48 (-0.72--0.24)		603289 (460789-782470)	35.05 (27.47-44.69)	1339142 (1005322-1742410)	35.99 (26.97-46.68)	0.23 (0.15-0.31)
Caribbean		33303 (28819-38638)	115.74 (100.81-133.88)	80490 (70375-92058)	153.28 (133.69-175.61)	0.91 (0.84-0.99)		2059 (1827-2330)	6.57 (5.94-7.32)	4174 (3757-4620)	8.18 (7.4-9.06)	0.7 (0.62-0.77)		123 (108-139)	0.56 (0.49-0.63)	250 (214-292)	0.46 (0.39-0.53)	-0.65 (-0.79--0.5)		7044 (5481-9092)	25.61 (20.17-32.34)	15232 (11719-19732)	28.87 (22.15-37.46)	0.39 (0.36-0.43)
Central Africa		28651 (24190-33794)	77 (66.86-89.12)	86486 (73335-101584)	90.6 (79.29-104.05)	0.54 (0.43-0.64)		2032 (1773-2322)	4.69 (4.19-5.24)	6261 (5452-7105)	5.44 (4.87-6.05)	0.5 (0.4-0.6)		12 (4-116)	0.05 (0.02-0.44)	17 (5-178)	0.03 (0.01-0.33)	-1.53 (-1.63--1.43)		4176 (2775-7088)	11.25 (7.49-20.45)	12114 (8091-17785)	12.64 (8.45-19.31)	0.37 (0.27-0.47)
Central Asia		70314 (60376-82366)	128.69 (112.13-148.85)	178265 (154583-202276)	185.43 (162.32-209.65)	1.33 (1.22-1.43)		4081 (3535-4673)	6.48 (5.75-7.26)	9153 (8152-10188)	9.28 (8.3-10.27)	1.28 (1.19-1.37)		13 (11-19)	0.03 (0.03-0.05)	130 (112-148)	0.18 (0.16-0.21)	5.02 (3.7-6.36)		9832 (6760-14077)	17.97 (12.39-25.51)	27178 (19307-37342)	28.71 (20.66-39.12)	1.75 (1.6-1.9)
Central Europe		244992 (214757-279091)	168.01 (145.91-192.07)	353898 (313573-398598)	201.8 (176.29-229.77)	0.69 (0.64-0.74)		11988 (10646-13528)	8.74 (7.73-9.82)	14882 (13269-16674)	10.54 (9.31-11.82)	0.69 (0.64-0.74)		754 (721-783)	0.51 (0.48-0.53)	498 (449-542)	0.21 (0.19-0.23)	-3.05 (-3.46--2.64)		50654 (40513-63590)	34.43 (27.42-43.5)	56296 (41533-75250)	31.32 (22.63-42.57)	-0.29 (-0.41--0.16)
Central Latin America		296684 (256565-337545)	287.75 (254.55-322.56)	946078 (837423-1057065)	360.24 (320.08-401.87)	0.69 (0.59-0.78)		20439 (18098-22838)	16.89 (15.1-18.86)	53218 (47958-58971)	20.11 (18.11-22.31)	0.55 (0.47-0.62)		1073 (1024-1112)	1.5 (1.42-1.56)	2349 (2055-2654)	0.97 (0.84-1.09)	-1.34 (-1.52--1.16)		64006 (51278-80565)	66.42 (54.46-81.58)	177718 (137945-225674)	68.34 (53.32-86.47)	0.11 (0.06-0.16)
Central Sub-Saharan Africa		25973 (22127-30332)	86.6 (75.99-99.42)	81310 (69457-94541)	104.67 (92.38-119.14)	0.64 (0.53-0.74)		1864 (1636-2122)	5.33 (4.8-5.95)	5940 (5219-6699)	6.35 (5.72-7.08)	0.6 (0.5-0.7)		12 (4-129)	0.07 (0.02-0.66)	19 (5-210)	0.04 (0.01-0.49)	-1.53 (-1.61--1.45)		3832 (2523-7252)	12.85 (8.56-26.61)	11399 (7621-17356)	14.65 (9.86-24.63)	0.44 (0.34-0.53)
Commonwealth High Income		480980 (440186-533069)	346.41 (316.38-384.72)	857167 (789347-934588)	382.24 (348.9-420.28)	0.35 (0.29-0.4)		27988 (25395-30884)	21.3 (19.46-23.42)	47726 (43660-52391)	23.58 (21.66-25.65)	0.36 (0.31-0.42)		2000 (1868-2074)	1.27 (1.18-1.31)	1626 (1426-1740)	0.54 (0.48-0.58)	-2.23 (-2.57--1.88)		99885 (80420-122589)	69.61 (55.63-86.26)	137698 (102979-177159)	59.74 (44.05-78.47)	-0.31 (-0.41--0.21)
Commonwealth Low Income		96291 (81216-113949)	81.35 (70.15-93.96)	333491 (286220-389617)	116.45 (101.42-134.28)	1.28 (1.14-1.42)		6998 (6080-8070)	5 (4.45-5.66)	21614 (19081-24439)	6.81 (6.04-7.63)	1.09 (0.97-1.22)		354 (216-617)	0.52 (0.31-0.91)	757 (477-1328)	0.42 (0.26-0.74)	-0.8 (-0.95--0.65)		20073 (14447-26681)	19.86 (14.52-26.67)	58514 (43031-79082)	22.25 (16.53-29.38)	0.43 (0.35-0.52)
Commonwealth Middle Income		1105676 (950693-1298535)	143.47 (125.28-167.1)	3436926 (3001609-3984854)	196.92 (173.28-225.84)	1.16 (1.05-1.26)		81381 (71545-92539)	9.66 (8.49-11.01)	238901 (211634-271001)	12.94 (11.42-14.68)	1.06 (0.97-1.14)		3642 (2558-5135)	0.76 (0.53-1.11)	9080 (6759-13065)	0.7 (0.52-1.02)	-0.2 (-0.33--0.08)		224888 (170404-288759)	32.67 (25.23-41.31)	623182 (468581-795398)	37.61 (29.19-47.45)	0.51 (0.46-0.57)
East Asia		2100400 (1797696-2457129)	204.04 (176.45-236.06)	4890488 (4268957-5597909)	238.79 (209.5-275.2)	0.59 (0.56-0.63)		131599 (114817-150105)	11.52 (10.12-13.06)	255036 (223780-291265)	13.61 (12.08-15.42)	0.61 (0.59-0.64)		4958 (4074-6130)	0.7 (0.57-0.85)	10661 (7750-12996)	0.54 (0.39-0.66)	-0.38 (-0.74--0.03)		415491 (317560-541804)	42.12 (32.93-53.95)	859610 (641907-1115845)	41.95 (31.21-55.02)	0.18 (0.06-0.29)
East Asia & Pacific - WB		2947940 (2546431-3422696)	191.44 (166.96-220.18)	6499524 (5697345-7438823)	206.34 (181.22-236.8)	0.34 (0.3-0.39)		184007 (161488-208566)	10.83 (9.52-12.27)	339280 (299245-385062)	11.48 (10.19-13)	0.27 (0.23-0.3)		7353 (6299-8643)	0.65 (0.55-0.75)	14414 (10932-17012)	0.46 (0.35-0.54)	-0.88 (-1.08--0.68)		579085 (445369-746536)	39.01 (30.62-49.75)	1134325 (848790-1465492)	35.94 (26.79-46.64)	-0.12 (-0.2--0.03)
Eastern Africa		67492 (56853-80510)	73.15 (63.46-85.31)	191287 (161043-226119)	84.68 (74-97.53)	0.53 (0.46-0.6)		4968 (4312-5749)	4.58 (4.09-5.18)	13899 (12062-16018)	5.19 (4.65-5.85)	0.45 (0.39-0.52)		30 (14-184)	0.05 (0.02-0.3)	56 (30-312)	0.04 (0.02-0.23)	-0.81 (-0.94--0.68)		10006 (6762-15039)	10.79 (7.38-16.49)	27531 (18603-39073)	12.09 (8.38-17.14)	0.41 (0.35-0.47)
Eastern Europe		384275 (332261-441912)	144.56 (123.99-167.27)	509963 (447452-577917)	175.91 (152.61-201.3)	0.69 (0.66-0.72)		16621 (14492-18778)	6.84 (5.93-7.78)	19118 (16896-21498)	8.28 (7.25-9.34)	0.66 (0.63-0.69)		975 (924-1012)	0.35 (0.33-0.36)	1314 (1202-1429)	0.38 (0.35-0.41)	-0.4 (-0.9-0.11)		79205 (63022-100589)	29.43 (23.23-37.65)	99250 (77923-126980)	33.15 (25.49-42.9)	0.22 (0.11-0.33)
Eastern Mediterranean Region		251277 (211016-298471)	99.76 (85.66-117.02)	775597 (655155-918557)	118.38 (101.12-138.68)	0.73 (0.6-0.85)		15820 (13495-18502)	5.12 (4.46-5.86)	43415 (37073-50148)	5.98 (5.24-6.81)	0.67 (0.54-0.8)		573 (363-814)	0.4 (0.25-0.59)	1272 (878-1685)	0.36 (0.25-0.48)	-0.6 (-0.78--0.42)		46279 (33512-61459)	20.65 (15.41-26.62)	132295 (94207-179886)	22.46 (16.49-29.17)	0.32 (0.29-0.35)
Eastern Sub-Saharan Africa		74596 (63192-88977)	76.35 (66.51-88.54)	203548 (171395-241552)	86.56 (75.82-99.71)	0.44 (0.38-0.5)		5570 (4857-6430)	4.88 (4.35-5.51)	15232 (13299-17531)	5.45 (4.9-6.13)	0.39 (0.33-0.44)		27 (9-225)	0.04 (0.01-0.35)	34 (11-354)	0.02 (0.01-0.25)	-2.05 (-2.17--1.94)		10813 (7205-16881)	11.01 (7.5-17.82)	28460 (18975-41536)	11.96 (8.16-17.28)	0.28 (0.23-0.34)
Europe		2005324 (1795365-2261081)	207.22 (185.02-233.67)	3111048 (2812650-3452301)	243.1 (217.78-273.04)	0.58 (0.53-0.63)		106313 (96113-117440)	11.58 (10.44-12.76)	152637 (138321-167735)	13.66 (12.41-15.02)	0.61 (0.56-0.66)		6348 (5906-6616)	0.62 (0.57-0.65)	5913 (5232-6337)	0.35 (0.31-0.37)	-1.91 (-2.21--1.61)		395548 (312712-494887)	40.32 (31.65-50.91)	513478 (388597-663240)	39.14 (29.01-51.61)	-0.06 (-0.11-0)
Europe & Central Asia - WB		2060239 (1846027-2322455)	205.89 (183.88-232.15)	3260211 (2951338-3616500)	243.09 (217.81-272.89)	0.6 (0.56-0.65)		109571 (99088-121071)	11.48 (10.35-12.65)	160433 (145445-176259)	13.59 (12.35-14.92)	0.62 (0.57-0.67)		6355 (5914-6627)	0.6 (0.56-0.63)	6024 (5327-6440)	0.34 (0.31-0.37)	-1.83 (-2.12--1.54)		403157 (317764-505457)	39.79 (31.15-50.32)	536370 (404351-694039)	39.09 (28.95-51.59)	-0.01 (-0.06-0.05)
European Region		2070588 (1854909-2334341)	205.49 (183.48-231.69)	3288252 (2975794-3649171)	242.59 (217.28-272.43)	0.6 (0.56-0.64)		110163 (99605-121734)	11.46 (10.33-12.62)	161932 (146847-177959)	13.57 (12.33-14.89)	0.62 (0.57-0.67)		6370 (5927-6642)	0.6 (0.56-0.63)	6050 (5350-6469)	0.34 (0.3-0.36)	-1.83 (-2.13--1.54)		404829 (319026-507625)	39.68 (31.06-50.18)	540511 (407292-699856)	38.98 (28.86-51.46)	-0.01 (-0.06-0.04)
High-income Asia Pacific		592972 (522707-682665)	289.76 (255.54-333.43)	909475 (812868-1023460)	267.27 (234.98-305.05)	-0.1 (-0.2-0)		35873 (31332-41372)	17.52 (15.28-20.04)	43684 (38485-49491)	15.95 (14.22-17.89)	-0.14 (-0.24--0.04)		1732 (1587-1824)	0.91 (0.82-0.96)	2418 (1959-2703)	0.42 (0.35-0.46)	-3.01 (-3.48--2.53)		114102 (89268-145934)	56.18 (44.01-71.51)	154656 (116749-200918)	42.76 (31.54-56.97)	-0.85 (-0.9--0.8)
High-income North America		829815 (766131-896924)	253.61 (234.71-275.98)	1655786 (1540092-1793938)	300.45 (279.54-325.66)	0.79 (0.71-0.87)		48282 (44135-52996)	15.49 (14.2-16.92)	92413 (84224-102220)	18.53 (17.09-20.21)	0.76 (0.69-0.84)		1912 (1747-1997)	0.52 (0.48-0.54)	2561 (2221-2789)	0.37 (0.32-0.4)	-1.26 (-1.76--0.75)		146081 (112367-185142)	43.96 (33.57-55.99)	257497 (193411-330957)	45.94 (34.02-60)	0.29 (0.16-0.42)
Latin America & Caribbean - WB		687743 (595460-791433)	209.55 (183.47-238.79)	1953986 (1729070-2208778)	272.27 (241.19-307.65)	0.89 (0.84-0.94)		42857 (37550-48343)	11.41 (10.19-12.7)	101411 (91700-112010)	14.34 (12.92-15.81)	0.77 (0.72-0.81)		1829 (1732-1913)	0.79 (0.74-0.83)	3958 (3540-4359)	0.57 (0.51-0.63)	-0.89 (-1.02--0.77)		134877 (104596-172554)	43.39 (34.31-54.79)	345966 (262085-446987)	48.39 (36.76-62.4)	0.44 (0.39-0.48)
Limited Health System		1234295 (1057379-1452369)	125.8 (109.4-146.35)	4001961 (3511675-4639142)	178.15 (157.15-203.92)	1.26 (1.16-1.35)		91207 (80142-104254)	8.45 (7.43-9.63)	277395 (246786-313880)	11.56 (10.27-13.09)	1.12 (1.05-1.2)		4128 (2876-6036)	0.69 (0.47-1.04)	10366 (7683-15183)	0.64 (0.48-0.96)	-0.14 (-0.26--0.03)		251597 (191188-323881)	28.94 (22.48-36.66)	723954 (543717-930291)	34.19 (26.36-42.89)	0.62 (0.56-0.67)
Middle East & North Africa - WB		120163 (99271-144657)	67.83 (57.07-80.61)	469356 (391491-556920)	102.04 (86.52-120.12)	1.36 (1.29-1.44)		7374 (6174-8761)	3.33 (2.85-3.86)	24025 (20472-27714)	4.94 (4.27-5.64)	1.32 (1.24-1.39)		92 (70-120)	0.08 (0.06-0.11)	258 (201-328)	0.08 (0.06-0.1)	0.36 (0.22-0.5)		19135 (13439-26791)	11.05 (7.96-15.18)	70130 (48537-96701)	15.51 (10.93-21.07)	1.19 (1.13-1.24)
Minimal Health System		49688 (41790-58980)	63.65 (54.97-74.09)	140374 (117928-165666)	76.35 (66.56-87.84)	0.6 (0.52-0.68)		3508 (3056-4051)	3.89 (3.46-4.37)	10220 (8858-11693)	4.56 (4.07-5.07)	0.53 (0.46-0.6)		30 (14-154)	0.05 (0.03-0.28)	58 (25-252)	0.05 (0.02-0.24)	-0.35 (-0.45--0.25)		7611 (5167-11352)	9.79 (6.8-14.87)	20935 (14179-29959)	11.31 (7.85-16.06)	0.49 (0.43-0.55)
North Africa and Middle East		183869 (156155-217387)	77.47 (66.58-90.18)	696923 (600267-808015)	118.34 (103.04-135.92)	1.46 (1.41-1.51)		11090 (9534-12923)	3.75 (3.27-4.28)	35193 (30737-39521)	5.52 (4.84-6.21)	1.34 (1.28-1.39)		274 (202-361)	0.17 (0.12-0.23)	537 (414-678)	0.13 (0.1-0.16)	-0.6 (-0.77--0.42)		33450 (24794-45218)	14.63 (11.07-19.5)	107743 (77072-146611)	18.69 (13.47-25.18)	0.92 (0.84-1)
North America		829817 (766134-896923)	253.6 (234.7-275.97)	1655796 (1540098-1793943)	300.44 (279.53-325.65)	0.79 (0.71-0.87)		48282 (44135-52996)	15.49 (14.2-16.92)	92413 (84223-102219)	18.53 (17.09-20.2)	0.76 (0.69-0.84)		1912 (1747-1997)	0.52 (0.48-0.54)	2562 (2221-2790)	0.37 (0.32-0.4)	-1.26 (-1.76--0.75)		146081 (112368-185143)	43.96 (33.57-55.99)	257500 (193414-330960)	45.93 (34.02-60)	0.29 (0.16-0.42)
Northern Africa		54742 (45037-65564)	62 (51.86-73.37)	193365 (161799-228806)	97.89 (82.58-115.07)	1.46 (1.39-1.54)		3280 (2740-3883)	3.01 (2.57-3.51)	10002 (8576-11495)	4.76 (4.11-5.45)	1.48 (1.41-1.56)		45 (31-67)	0.08 (0.05-0.12)	129 (88-189)	0.09 (0.06-0.13)	1.06 (0.83-1.28)		8859 (6162-12317)	10.29 (7.38-13.99)	29634 (20595-40901)	15.25 (10.67-20.84)	1.36 (1.31-1.41)
Oceania		1967 (1587-2426)	42.76 (35.14-51.85)	5648 (4620-6791)	50.75 (42.63-60.28)	0.48 (0.43-0.53)		124 (102-149)	2.19 (1.84-2.58)	329 (275-386)	2.56 (2.2-2.97)	0.44 (0.39-0.5)		0 (0-0)	0 (0-0)	0 (0-0)	0 (0-0)	-0.58 (-0.81--0.34)		279 (176-417)	6.02 (3.87-8.83)	794 (513-1190)	7.06 (4.6-10.45)	0.45 (0.4-0.49)
Region of the Americas		1512404 (1379759-1676208)	236.72 (216.36-261.6)	3598203 (3287928-3952313)	290.57 (265.03-320.43)	0.81 (0.76-0.86)		90840 (82150-99645)	13.66 (12.41-14.97)	193288 (176570-211146)	16.46 (14.99-17.96)	0.72 (0.66-0.77)		3721 (3475-3860)	0.62 (0.58-0.64)	6488 (5846-7063)	0.48 (0.43-0.52)	-0.87 (-1.11--0.63)		279962 (215706-354594)	44.14 (34.17-55.73)	601497 (455527-772391)	48.14 (36.25-62.12)	0.39 (0.31-0.46)
South-East Asia Region		1020167 (870090-1201760)	119.06 (103.69-138.81)	3396918 (2967344-3948948)	174.18 (153.06-200.33)	1.35 (1.25-1.44)		76495 (67249-87857)	8.23 (7.22-9.39)	235036 (207986-266960)	11.6 (10.27-13.17)	1.21 (1.13-1.28)		3645 (2554-5179)	0.69 (0.48-1)	9390 (7045-13600)	0.62 (0.46-0.9)	-0.23 (-0.35--0.1)		213496 (163199-276184)	28.14 (21.73-35.66)	621938 (470433-794535)	33.2 (25.63-41.85)	0.62 (0.55-0.69)
South Asia		1025289 (879018-1208897)	145.42 (126.64-169.62)	3356546 (2923451-3899299)	206.67 (181.24-237.01)	1.27 (1.16-1.38)		76802 (67462-87625)	10.02 (8.79-11.43)	234511 (207213-266928)	13.77 (12.15-15.66)	1.13 (1.05-1.22)		3788 (2594-5502)	0.88 (0.59-1.32)	9582 (7047-14143)	0.78 (0.56-1.16)	-0.35 (-0.47--0.23)		214235 (162181-274666)	34.7 (26.62-44.05)	618505 (468874-786247)	40.01 (30.97-50.43)	0.53 (0.46-0.59)
South Asia - WB		1035087 (886990-1220491)	142.45 (124-166.23)	3384870 (2949348-3931656)	203.13 (178.13-232.99)	1.28 (1.17-1.39)		77383 (67983-88303)	9.79 (8.6-11.17)	236180 (208741-268735)	13.52 (11.93-15.36)	1.15 (1.06-1.23)		3805 (2611-5517)	0.86 (0.58-1.28)	9624 (7076-14183)	0.76 (0.55-1.14)	-0.32 (-0.44--0.2)		216133 (163647-277155)	33.9 (26.05-43.03)	623786 (472638-794648)	39.31 (30.42-49.57)	0.55 (0.48-0.61)
Southeast Asia		185416 (154951-223845)	55.46 (47.4-65.52)	542213 (460504-644358)	74.62 (64.01-87.73)	1.02 (1-1.05)		12099 (10417-14221)	3.16 (2.76-3.64)	31154 (27367-35740)	4.23 (3.73-4.81)	0.97 (0.95-0.99)		441 (291-554)	0.22 (0.14-0.27)	1053 (675-1246)	0.2 (0.13-0.24)	-0.33 (-0.46--0.2)		36356 (27130-48155)	11.75 (9-15.39)	95196 (70890-127961)	13.67 (10.33-18.07)	0.49 (0.47-0.52)
Southern Africa		121429 (105764-137979)	204.45 (179.59-229.59)	243634 (212025-277311)	189.67 (166.08-213.37)	-0.17 (-0.21--0.13)		7796 (6866-8800)	10.53 (9.39-11.75)	14520 (12819-16261)	9.63 (8.65-10.7)	-0.2 (-0.27--0.14)		256 (191-326)	0.64 (0.47-0.82)	384 (321-486)	0.48 (0.4-0.6)	-1.49 (-1.95--1.02)		24159 (18766-30802)	42.2 (33.15-53.64)	42401 (31652-55440)	34.9 (26.81-44.35)	-0.77 (-0.93--0.62)
Southern Latin America		77179 (67274-88809)	164.02 (143.42-188.63)	215374 (193283-241137)	267.62 (239.07-301.08)	1.54 (1.44-1.63)		4516 (4024-5030)	9.44 (8.41-10.52)	11285 (10211-12405)	14.75 (13.28-16.19)	1.41 (1.33-1.49)		234 (215-252)	0.53 (0.49-0.57)	390 (352-430)	0.44 (0.4-0.48)	0.02 (-0.32-0.36)		15942 (12478-20336)	34.08 (26.77-43.39)	36211 (27300-47553)	44.56 (33.32-58.57)	1.02 (0.89-1.14)
Southern Sub-Saharan Africa		104499 (90830-118637)	289.57 (253.22-326.56)	191178 (166314-217883)	262.29 (230.5-296.17)	-0.19 (-0.25--0.12)		6543 (5701-7411)	14.4 (12.74-16.12)	10579 (9299-11862)	13.18 (11.72-14.74)	-0.16 (-0.24--0.07)		249 (188-296)	0.94 (0.71-1.14)	374 (315-468)	0.73 (0.61-0.91)	-1.36 (-1.82--0.91)		21687 (17009-27424)	62.07 (48.98-77.96)	35076 (26804-45000)	50.49 (39.27-63.8)	-0.79 (-0.94--0.65)
Sub-Saharan Africa - WB		269523 (230661-314129)	90.42 (79.08-103.88)	685523 (586041-803969)	96.16 (84-110.46)	0.24 (0.17-0.31)		18339 (15902-20953)	5.09 (4.53-5.7)	45843 (39644-52193)	5.35 (4.77-6)	0.21 (0.12-0.29)		303 (217-623)	0.16 (0.11-0.32)	467 (370-937)	0.11 (0.09-0.22)	-1.67 (-2.07--1.26)		45592 (33032-60965)	15.62 (11.55-20.89)	104769 (73338-146143)	15.05 (10.84-20.46)	-0.21 (-0.26--0.16)
Tropical Latin America		210469 (173193-250331)	167.42 (139.12-197.72)	435025 (367255-508968)	168.76 (142.13-197.32)	0.25 (0.18-0.31)		11505 (9576-13400)	7.56 (6.42-8.72)	18330 (15761-20894)	7.61 (6.53-8.71)	0.21 (0.15-0.27)		241 (226-253)	0.27 (0.25-0.29)	650 (587-702)	0.26 (0.23-0.28)	0.12 (-0.1-0.33)		35291 (25673-47419)	28.95 (21.37-38.52)	73995 (54369-98375)	28.77 (21.11-38.2)	0.23 (0.15-0.31)
Western Africa		51389 (41650-63102)	48.06 (40.06-58.03)	162681 (131913-199469)	61.21 (51.19-73.12)	0.85 (0.73-0.98)		3507 (2940-4212)	2.75 (2.35-3.22)	11072 (9273-13147)	3.41 (2.94-3.91)	0.74 (0.63-0.86)		5 (3-8)	0.01 (0-0.01)	11 (5-20)	0.01 (0-0.02)	1.54 (0.92-2.16)		7173 (4688-10437)	6.67 (4.48-9.56)	22529 (14536-32405)	8.41 (5.62-11.9)	0.84 (0.72-0.95)
Western Europe		1315705 (1178741-1478059)	255.92 (227.08-290.86)	2043824 (1842355-2261732)	285.97 (253.69-322.49)	0.4 (0.35-0.45)		74241 (67131-82453)	15.49 (13.98-17.19)	109230 (98399-121128)	17.36 (15.74-19.19)	0.42 (0.36-0.48)		4472 (4103-4682)	0.74 (0.68-0.77)	3880 (3330-4213)	0.35 (0.31-0.38)	-2.2 (-2.48--1.91)		252853 (199695-315867)	47.59 (36.93-60.29)	325683 (244816-422106)	44 (32.08-58.49)	-0.15 (-0.21--0.1)
Western Pacific Region		2794921 (2416804-3242797)	213.48 (185.94-245.46)	6090205 (5334504-6958891)	231.09 (202.64-265.69)	0.35 (0.3-0.39)		174110 (152857-197403)	12.14 (10.66-13.75)	316331 (278623-360071)	12.99 (11.53-14.73)	0.29 (0.26-0.33)		6938 (5949-8173)	0.71 (0.6-0.82)	13453 (10172-16011)	0.49 (0.37-0.58)	-0.96 (-1.17--0.75)		547453 (421004-705818)	43.27 (33.96-55.12)	1058964 (790950-1369996)	39.89 (29.64-52.09)	-0.12 (-0.21--0.04)
Western Sub-Saharan Africa		57359 (46460-70444)	48.63 (40.49-58.64)	183674 (149472-225074)	61.79 (51.74-73.64)	0.84 (0.71-0.97)		3915 (3280-4697)	2.79 (2.38-3.25)	12534 (10472-14865)	3.45 (2.99-3.95)	0.74 (0.62-0.85)		6 (3-9)	0.01 (0-0.01)	11 (6-21)	0.01 (0-0.02)	1.22 (0.66-1.78)		8001 (5246-11616)	6.74 (4.55-9.68)	25427 (16435-36632)	8.48 (5.68-12.04)	0.82 (0.7-0.94)
World Bank High Income		3117701 (2825449-3485589)	251 (227.06-280.62)	5357483 (4895248-5889584)	277.03 (251.7-307.31)	0.44 (0.38-0.51)		179033 (161408-198648)	15.09 (13.62-16.75)	282421 (256324-311584)	16.55 (15.15-18.08)	0.41 (0.35-0.48)		9317 (8628-9693)	0.71 (0.65-0.74)	10095 (8693-10900)	0.38 (0.33-0.41)	-2.09 (-2.23--1.96)		581415 (458575-725073)	47.17 (36.9-59.23)	846472 (634385-1091954)	43.27 (31.96-57.02)	-0.19 (-0.22--0.15)
World Bank Low Income		136642 (116086-160348)	76.84 (67.15-88.42)	374034 (319080-437580)	91.99 (81.06-105.25)	0.63 (0.57-0.69)		9450 (8283-10808)	4.57 (4.08-5.14)	25543 (22420-29148)	5.26 (4.71-5.88)	0.5 (0.44-0.56)		160 (105-388)	0.13 (0.09-0.3)	352 (240-684)	0.13 (0.09-0.25)	0.12 (-0.02-0.26)		24234 (17060-33188)	13.07 (9.38-17.79)	63536 (44861-87652)	14.91 (11.03-20.2)	0.49 (0.45-0.53)
World Bank Lower Middle Income		1450790 (1242359-1720742)	108.93 (94.66-127.27)	4597767 (4039957-5341006)	156.38 (137.96-180.06)	1.29 (1.2-1.39)		103382 (90627-118640)	7.04 (6.19-8.02)	306171 (272358-346599)	9.88 (8.77-11.13)	1.21 (1.14-1.28)		4453 (3150-6365)	0.54 (0.38-0.79)	11079 (8398-15798)	0.54 (0.41-0.78)	0.09 (-0.03-0.2)		283239 (215012-365291)	24.41 (18.97-30.89)	799394 (597943-1033323)	29.8 (22.9-37.51)	0.73 (0.68-0.78)
World Bank Upper Middle Income		3247213 (2806444-3757147)	190.96 (166.34-219)	7583813 (6709380-8660016)	233.92 (206.21-266.37)	0.73 (0.71-0.76)		196045 (171455-222118)	10.44 (9.24-11.82)	385623 (342387-433679)	12.9 (11.51-14.39)	0.76 (0.73-0.78)		7720 (6749-8935)	0.59 (0.51-0.67)	15784 (12698-18134)	0.48 (0.38-0.55)	-0.49 (-0.69--0.28)		656270 (503991-847043)	38.59 (30.21-49.16)	1367147 (1027880-1779513)	40.73 (30.52-53.16)	0.29 (0.22-0.36)
Afghanistan		3982 (3306-4674)	54.95 (46-65.17)	13312 (10904-15811)	70.57 (59.7-82.2)	0.9 (0.76-1.04)		224 (190-262)	2.75 (2.37-3.18)	889 (737-1041)	3.35 (2.88-3.8)	0.73 (0.56-0.9)		14 (6-23)	0.2 (0.09-0.34)	34 (15-57)	0.32 (0.16-0.53)	1.87 (1.63-2.12)		984 (622-1363)	13.25 (8.46-18.24)	3080 (2049-4410)	18.11 (12.15-25.26)	1.26 (1.16-1.35)
Albania		2458 (2086-2985)	94.59 (79.78-114.02)	5785 (4946-6767)	156.6 (132.78-183.48)	1.86 (1.79-1.94)		150 (127-178)	5.06 (4.32-5.87)	269 (233-311)	8.39 (7.29-9.65)	1.86 (1.79-1.94)		7 (5-9)	0.35 (0.25-0.46)	7 (5-11)	0.17 (0.11-0.25)	-2.38 (-2.64--2.12)		504 (378-668)	20.46 (15.58-26.5)	905 (649-1238)	24.15 (16.85-33.49)	0.74 (0.64-0.84)
Algeria		8546 (7044-10146)	51 (42.51-60.26)	34539 (28906-40599)	79.52 (67.26-92.94)	1.55 (1.46-1.65)		541 (452-637)	2.56 (2.19-2.97)	1781 (1514-2069)	3.98 (3.42-4.6)	1.54 (1.45-1.62)		7 (5-10)	0.05 (0.04-0.08)	27 (18-36)	0.08 (0.05-0.11)	1.65 (1.33-1.97)		1391 (970-1918)	8.33 (5.92-11.43)	5382 (3740-7471)	12.56 (8.8-17.31)	1.5 (1.43-1.57)
American Samoa		24 (20-30)	68.37 (56.54-82.11)	44 (36-52)	85.31 (70.54-102.46)	0.6 (0.54-0.67)		1 (1-2)	3.34 (2.81-3.92)	2 (2-2)	4.16 (3.57-4.82)	0.6 (0.54-0.65)		0 (0-0)	0 (0-0)	0 (0-0)	0 (0-0)	-3.55 (-5.48--1.58)		3 (2-5)	9.46 (6.1-13.85)	6 (4-9)	11.55 (7.47-17.05)	0.55 (0.48-0.61)
Andorra		92 (76-109)	148.19 (124.13-174.58)	217 (183-253)	169.03 (140.95-197.33)	0.53 (0.49-0.57)		5 (4-6)	7.96 (6.81-9.16)	10 (8-11)	8.88 (7.58-10.18)	0.44 (0.4-0.47)		0 (0-0)	0.08 (0.05-0.12)	0 (0-0)	0.04 (0.02-0.05)	-2.12 (-2.36--1.88)		13 (9-18)	21.47 (14.44-30)	30 (20-42)	23.3 (15.39-33.03)	0.38 (0.33-0.43)
Angola		4684 (3963-5499)	84.95 (74.87-96.7)	18999 (16164-22081)	111.18 (97.73-125.01)	0.98 (0.88-1.07)		348 (304-396)	5.31 (4.75-5.87)	1404 (1223-1588)	6.72 (6.06-7.45)	0.86 (0.77-0.95)		2 (1-21)	0.06 (0.02-0.64)	4 (1-43)	0.04 (0.01-0.46)	-1.82 (-1.94--1.7)		694 (442-1294)	12.69 (8.23-26.18)	2642 (1704-4041)	15.4 (10.18-23.72)	0.71 (0.63-0.8)
Antigua and Barbuda		57 (50-66)	105.7 (91.41-121.94)	158 (136-183)	148.49 (128.44-171.21)	1.04 (0.96-1.11)		4 (3-4)	6.66 (5.99-7.48)	9 (8-10)	9.15 (8.22-10.2)	0.96 (0.88-1.05)		0 (0-0)	0.42 (0.36-0.49)	0 (0-0)	0.52 (0.45-0.59)	0.67 (0.41-0.93)		11 (9-15)	20.98 (15.95-26.8)	29 (21-37)	27.68 (20.85-35.57)	0.82 (0.7-0.94)
Argentina		47402 (40696-55085)	147.42 (126.7-171.36)	114333 (100753-129570)	220.44 (193.49-250.36)	1.19 (1.08-1.3)		2663 (2357-2983)	8.27 (7.3-9.25)	5850 (5266-6462)	11.74 (10.55-12.98)	1.04 (0.94-1.13)		121 (111-132)	0.39 (0.36-0.42)	198 (177-218)	0.35 (0.31-0.38)	0.48 (0.1-0.87)		9359 (7255-12018)	29.06 (22.49-37.29)	19457 (14585-25720)	37.18 (27.82-49.4)	0.93 (0.78-1.08)
Armenia		2379 (1967-2887)	75.71 (62.62-90.87)	4385 (3743-5128)	114.82 (97.36-135.02)	1.48 (1.43-1.54)		128 (108-153)	3.79 (3.21-4.47)	191 (163-217)	5.66 (4.86-6.51)	1.43 (1.38-1.48)		0 (0-0)	0.01 (0.01-0.01)	5 (4-5)	0.11 (0.09-0.13)	7.44 (5.43-9.49)		329 (213-490)	10.44 (6.77-15.36)	666 (468-921)	17.32 (12.08-24)	1.98 (1.76-2.2)
Australia		57157 (50712-64366)	295.99 (261.78-335.55)	135328 (119508-151758)	346.84 (303.81-394.99)	0.58 (0.43-0.74)		3690 (3322-4099)	19.62 (17.61-21.74)	8045 (7189-9012)	22.6 (20.03-25.14)	0.53 (0.37-0.69)		182 (165-197)	0.92 (0.83-1)	242 (204-276)	0.48 (0.41-0.54)	-2.08 (-2.38--1.79)		10865 (8444-13756)	55.76 (43.24-71.19)	21359 (15820-27761)	53.57 (39.02-71.02)	-0.05 (-0.13-0.02)
Austria		26583 (23593-29715)	257.7 (226.12-291.36)	37922 (33474-42856)	271.64 (235.41-312.07)	0.24 (0.11-0.37)		1408 (1275-1561)	14.92 (13.4-16.59)	1872 (1694-2098)	15.41 (13.75-17.24)	0.19 (0.05-0.33)		74 (66-83)	0.59 (0.53-0.65)	48 (41-55)	0.23 (0.2-0.26)	-2.76 (-3.08--2.43)		4838 (3729-6166)	45.35 (34.47-58.46)	5753 (4168-7668)	40.31 (28.34-54.36)	-0.27 (-0.34--0.19)
Azerbaijan		4074 (3339-4958)	66.67 (55.37-80.52)	10222 (8435-12418)	85.37 (70.62-103.65)	1.1 (0.82-1.39)		231 (193-278)	3.32 (2.78-3.94)	486 (411-576)	4.2 (3.58-4.96)	1.05 (0.78-1.33)		0 (0-0)	0 (0-0.01)	1 (0-1)	0.01 (0-0.02)	3.37 (2.3-4.45)		564 (372-823)	9.18 (6.09-13.4)	1406 (904-2043)	11.77 (7.68-16.89)	1.09 (0.84-1.34)
Bahamas		232 (194-277)	118.25 (100.82-137.87)	657 (569-770)	152.19 (132.46-176.96)	0.86 (0.75-0.97)		15 (13-18)	6.93 (6.17-7.73)	36 (32-40)	8.71 (7.81-9.68)	0.78 (0.68-0.88)		1 (1-1)	0.51 (0.43-0.59)	2 (1-2)	0.48 (0.4-0.58)	-0.47 (-0.74--0.21)		47 (36-61)	25.59 (20.02-32.68)	120 (89-156)	28.6 (21.54-36.94)	0.3 (0.21-0.39)
Bahrain		449 (358-560)	121.56 (102.66-142.81)	3275 (2694-3870)	206.37 (178.69-236.57)	1.68 (1.63-1.74)		30 (24-37)	5.84 (5.06-6.73)	182 (157-209)	9.84 (8.69-11.15)	1.61 (1.54-1.67)		0 (0-0)	0.04 (0.03-0.06)	2 (1-2)	0.24 (0.17-0.33)	8.89 (7.49-10.31)		63 (40-93)	17 (11.67-24.33)	481 (331-679)	31.79 (22.96-43.34)	2.32 (2.17-2.46)
Bangladesh		57640 (48101-67956)	87.24 (74.12-100.81)	218910 (186137-254046)	140.23 (119.99-161.39)	1.75 (1.56-1.95)		4114 (3533-4773)	5.18 (4.58-5.89)	13104 (11432-14813)	8.05 (7.07-9.03)	1.62 (1.43-1.81)		342 (211-522)	0.88 (0.53-1.37)	739 (470-1148)	0.63 (0.39-1.01)	-1.25 (-1.5--1)		14520 (10645-18755)	27.33 (19.81-35.65)	42547 (31631-56448)	29 (21.71-38.12)	0.23 (0.15-0.31)
Barbados		442 (387-499)	163.96 (142.33-186.81)	992 (873-1120)	225.01 (195.67-255.15)	0.91 (0.81-1.01)		29 (26-32)	9.98 (9.03-10.97)	54 (49-60)	13.44 (12.19-14.84)	0.86 (0.77-0.95)		2 (2-3)	0.78 (0.68-0.89)	4 (3-5)	0.84 (0.68-1.04)	0.46 (0.18-0.74)		93 (73-118)	34.19 (26.55-43.69)	195 (151-246)	42.9 (32.53-55)	0.74 (0.61-0.88)
Belarus		10104 (8437-11967)	82.95 (69.26-98.65)	17302 (14847-20453)	127.44 (107.82-151.79)	1.47 (1.33-1.6)		461 (386-539)	4.1 (3.43-4.77)	702 (604-817)	6.32 (5.42-7.38)	1.47 (1.34-1.6)		2 (2-3)	0.02 (0.02-0.02)	3 (3-4)	0.02 (0.02-0.03)	-0.53 (-0.88--0.17)		1417 (942-2023)	11.66 (7.8-16.84)	2359 (1576-3376)	17.48 (11.46-25.3)	1.35 (1.22-1.47)
Belgium		31358 (27657-35721)	232.36 (202.11-268.2)	46806 (41053-52631)	263.73 (225.76-305.59)	0.47 (0.42-0.52)		1754 (1574-1941)	13.98 (12.45-15.64)	2432 (2185-2712)	15.55 (13.78-17.37)	0.4 (0.35-0.46)		78 (70-86)	0.49 (0.44-0.54)	72 (59-83)	0.27 (0.23-0.31)	-2.35 (-2.63--2.07)		5506 (4193-7156)	39.86 (29.73-52.22)	7268 (5283-9748)	39.88 (28.37-55.29)	-0.06 (-0.1--0.01)
Belize		125 (106-148)	110.73 (95.73-128.06)	581 (488-682)	155.79 (133.2-180.31)	1.14 (1.09-1.2)		9 (8-10)	6.53 (5.83-7.32)	35 (30-40)	8.78 (7.77-9.85)	1 (0.96-1.05)		0 (0-0)	0.34 (0.28-0.43)	1 (1-1)	0.44 (0.38-0.51)	0.46 (-0.08-1.01)		24 (18-31)	21.46 (16.39-28.01)	104 (77-139)	29.05 (21.92-38.05)	0.87 (0.7-1.03)
Benin		1348 (1097-1671)	50.75 (41.97-61.48)	5046 (4126-6155)	64.52 (53.71-76.65)	0.83 (0.76-0.91)		94 (79-114)	2.96 (2.56-3.44)	352 (296-416)	3.64 (3.15-4.15)	0.71 (0.64-0.79)		0 (0-0)	0.01 (0-0.01)	0 (0-0)	0 (0-0.01)	-1.97 (-2.17--1.78)		188 (122-276)	7 (4.65-10.07)	697 (437-1021)	8.77 (5.68-12.54)	0.77 (0.7-0.84)
Bermuda		86 (73-102)	131.68 (112.02-154.58)	193 (167-219)	179.98 (153.53-211.53)	1.1 (1.01-1.19)		5 (5-6)	7.86 (6.98-8.82)	10 (9-12)	10.7 (9.46-12.07)	1.06 (0.97-1.16)		0 (0-0)	0.47 (0.4-0.54)	1 (0-1)	0.35 (0.28-0.44)	-1.43 (-1.8--1.05)		16 (12-20)	24.77 (18.51-32.13)	32 (24-42)	28.87 (20.52-39.38)	0.46 (0.42-0.51)
Bhutan		463 (387-559)	133.67 (115.67-156.24)	1469 (1242-1702)	211.35 (182.25-241.61)	1.63 (1.5-1.75)		35 (30-41)	8.46 (7.43-9.49)	96 (84-109)	13.26 (11.73-14.86)	1.56 (1.46-1.66)		2 (1-2)	1.01 (0.55-1.46)	4 (3-6)	0.81 (0.48-1.17)	-0.78 (-0.82--0.73)		97 (70-131)	35.34 (24.96-45.34)	272 (194-365)	41.41 (29.56-54.76)	0.53 (0.43-0.63)
Bolivia (Plurinational State of)		7926 (6723-9193)	191.68 (167.2-218.17)	32329 (27969-36903)	308.39 (269.71-347.71)	1.61 (1.59-1.64)		526 (459-602)	11.08 (9.97-12.33)	1922 (1720-2151)	17.23 (15.63-19.11)	1.47 (1.44-1.49)		28 (22-39)	1.24 (0.93-1.62)	70 (50-98)	0.99 (0.71-1.36)	-0.76 (-0.81--0.72)		1703 (1334-2208)	46.66 (37.64-58.69)	5682 (4179-7428)	57.32 (42.61-73.59)	0.68 (0.66-0.69)
Bosnia and Herzegovina		7803 (6761-8937)	168.71 (146.81-191.57)	12754 (11260-14255)	249.13 (217.06-279.28)	1.54 (1.43-1.65)		418 (365-474)	8.64 (7.57-9.76)	529 (467-599)	12.75 (11.18-14.35)	1.54 (1.44-1.65)		12 (9-16)	0.34 (0.24-0.45)	14 (9-19)	0.21 (0.14-0.3)	-1.8 (-2.02--1.57)		1341 (982-1767)	29.78 (22.06-39)	1929 (1396-2608)	37.15 (26.14-51.3)	0.89 (0.83-0.95)
Botswana		1046 (881-1227)	138.02 (118.24-158.29)	3864 (3294-4496)	186.56 (162.93-213)	1.07 (0.92-1.22)		72 (62-83)	7.74 (6.9-8.67)	239 (209-272)	10.14 (9.02-11.36)	0.96 (0.82-1.1)		3 (2-5)	0.64 (0.32-0.94)	5 (1-8)	0.42 (0.12-0.6)	-1.27 (-1.53--1.01)		234 (173-303)	33.14 (24-42.65)	649 (461-875)	33.23 (24.33-43.92)	0.04 (-0.09-0.18)
Brazil		205346 (168906-244223)	167.09 (138.8-197.31)	414187 (347857-484209)	165.25 (138.36-193.27)	0.2 (0.13-0.27)		11199 (9317-13034)	7.53 (6.39-8.68)	17216 (14760-19736)	7.4 (6.31-8.47)	0.15 (0.09-0.22)		233 (219-245)	0.27 (0.25-0.29)	615 (559-664)	0.25 (0.23-0.27)	0.02 (-0.2-0.24)		34365 (24979-46118)	28.85 (21.29-38.4)	70285 (51445-93471)	28.09 (20.59-37.3)	0.17 (0.09-0.26)
Brunei Darussalam		269 (229-319)	174.94 (153.37-200.33)	1020 (874-1178)	230.07 (202.14-260.15)	0.9 (0.79-1.01)		20 (17-23)	10.88 (9.77-12.12)	67 (60-75)	13.91 (12.52-15.42)	0.8 (0.7-0.9)		1 (1-1)	1.23 (0.89-1.64)	2 (2-3)	0.81 (0.58-1.1)	-1.02 (-1.25--0.78)		62 (47-82)	48.52 (37.74-61.62)	190 (141-254)	46.45 (34.85-60.28)	-0.02 (-0.06-0.03)
Bulgaria		10886 (9148-12937)	98.04 (82.51-116.81)	12819 (11057-14745)	123.3 (105.02-144.8)	0.76 (0.62-0.9)		479 (413-555)	4.94 (4.18-5.76)	504 (434-575)	6.27 (5.42-7.22)	0.79 (0.65-0.93)		15 (13-17)	0.13 (0.12-0.15)	10 (8-13)	0.07 (0.06-0.09)	-2.66 (-3.11--2.21)		1803 (1336-2460)	16.09 (11.87-22.18)	1892 (1332-2636)	17.99 (12.45-25.16)	0.29 (0.1-0.48)
Burkina Faso		2648 (2171-3211)	48.16 (40.32-57.24)	7882 (6386-9617)	59.09 (49.31-70.47)	0.75 (0.68-0.81)		182 (155-215)	2.85 (2.47-3.28)	548 (457-648)	3.4 (2.96-3.92)	0.64 (0.58-0.7)		0 (0-1)	0.01 (0-0.02)	0 (0-1)	0.01 (0-0.01)	-2.09 (-2.25--1.92)		371 (235-550)	6.74 (4.38-9.89)	1097 (682-1625)	8.13 (5.19-11.91)	0.69 (0.62-0.75)
Burundi		2107 (1786-2482)	71.98 (63.03-82.57)	5441 (4557-6534)	77.88 (68.22-89.93)	0.34 (0.28-0.39)		156 (135-178)	4.61 (4.13-5.23)	413 (358-478)	4.94 (4.42-5.51)	0.29 (0.24-0.34)		1 (0-8)	0.05 (0.01-0.4)	1 (0-10)	0.02 (0.01-0.25)	-2.46 (-2.64--2.27)		311 (205-507)	10.58 (7.06-18.06)	768 (501-1142)	10.89 (7.36-16)	0.13 (0.09-0.18)
Cabo Verde		121 (100-145)	53.02 (44.47-64.04)	381 (317-456)	72.45 (61.16-86.3)	1.13 (1.04-1.23)		8 (6-9)	2.95 (2.51-3.4)	22 (19-26)	3.95 (3.41-4.55)	1.06 (0.96-1.15)		0 (0-0)	0.01 (0-0.01)	0 (0-0)	0 (0-0)	-4.86 (-5.34--4.38)		17 (11-24)	7.32 (4.68-10.49)	52 (34-76)	9.77 (6.48-14.38)	1.06 (0.96-1.16)
Cambodia		2954 (2434-3567)	47.75 (40.3-56.7)	11022 (9380-13157)	74.47 (64.34-87.73)	1.47 (1.43-1.51)		203 (174-238)	2.78 (2.43-3.17)	695 (609-797)	4.4 (3.87-4.97)	1.48 (1.45-1.52)		13 (7-17)	0.37 (0.21-0.51)	33 (17-45)	0.37 (0.19-0.5)	0.02 (-0.04-0.07)		733 (551-960)	13.63 (10.11-17.43)	2194 (1633-2873)	16.36 (12.23-20.85)	0.57 (0.52-0.61)
Cameroon		3691 (3003-4528)	59.8 (49.91-72.06)	14246 (11428-17342)	72.73 (60.33-86.74)	0.67 (0.5-0.83)		253 (211-298)	3.42 (2.94-3.95)	981 (819-1160)	4.08 (3.55-4.69)	0.6 (0.45-0.76)		0 (0-1)	0.01 (0-0.02)	0 (0-1)	0.01 (0-0.01)	-2.59 (-2.79--2.38)		509 (322-748)	8.21 (5.34-11.77)	1959 (1256-2885)	9.85 (6.39-14.12)	0.6 (0.44-0.76)
Canada		77827 (75945-79956)	246.45 (240.61-253.23)	195911 (190969-201269)	331.84 (323.59-340.53)	0.95 (0.84-1.06)		4695 (4420-4966)	15.25 (14.42-16.07)	10898 (10177-11515)	20.74 (19.64-21.71)	0.99 (0.88-1.1)		209 (186-229)	0.63 (0.56-0.69)	301 (251-336)	0.38 (0.32-0.43)	-1.91 (-2.25--1.57)		14315 (11200-17951)	44.88 (34.99-56.49)	30641 (22775-40080)	50.81 (37.26-67.28)	0.32 (0.19-0.45)
Central African Republic		1442 (1227-1677)	93.2 (81.92-106.62)	3198 (2726-3678)	97.21 (85.88-109.16)	0.18 (0.14-0.23)		104 (93-117)	5.74 (5.22-6.36)	236 (209-265)	5.97 (5.39-6.57)	0.18 (0.13-0.23)		1 (0-7)	0.08 (0.02-0.84)	1 (0-11)	0.05 (0.01-0.62)	-1.6 (-1.69--1.51)		215 (143-425)	14.06 (9.43-30.37)	455 (299-751)	13.91 (9.43-25.91)	-0.01 (-0.05-0.03)
Chad		1524 (1229-1877)	43.6 (36.02-52.93)	4373 (3561-5403)	48.88 (41.12-58.24)	0.42 (0.29-0.55)		105 (88-125)	2.58 (2.22-2.99)	323 (269-386)	2.88 (2.5-3.31)	0.41 (0.29-0.53)		0 (0-0)	0.01 (0-0.02)	0 (0-1)	0.01 (0-0.01)	-1.24 (-1.49--0.99)		213 (139-310)	6.07 (4.08-8.83)	613 (394-891)	6.78 (4.55-9.69)	0.38 (0.26-0.5)
Chile		24311 (21198-27827)	216.84 (190.52-245.64)	91029 (81532-101779)	379.05 (338-424.84)	1.84 (1.75-1.92)		1524 (1355-1704)	12.69 (11.39-14.05)	4893 (4369-5471)	21.64 (19.52-24.14)	1.76 (1.69-1.83)		89 (81-97)	0.97 (0.88-1.06)	148 (131-168)	0.57 (0.5-0.64)	-1.18 (-1.54--0.81)		5350 (4262-6655)	49.4 (39.85-60.78)	14645 (10866-19401)	60.56 (44.58-80.56)	0.85 (0.73-0.97)
China		2041682 (1746913-2391022)	205.7 (177.56-238.18)	4755487 (4141219-5452492)	240.7 (210.77-277.95)	0.59 (0.55-0.62)		127826 (111477-145914)	11.59 (10.15-13.15)	247307 (216205-282998)	13.7 (12.12-15.55)	0.61 (0.59-0.64)		4776 (3903-5934)	0.7 (0.57-0.85)	10279 (7411-12615)	0.54 (0.39-0.66)	-0.38 (-0.75--0.02)		403058 (307641-526244)	42.37 (33.04-54.32)	833818 (621520-1083523)	42.19 (31.3-55.45)	0.17 (0.05-0.29)
Colombia		36254 (30941-42140)	159.42 (139.03-181.42)	133542 (117299-150895)	243.59 (213.54-275.69)	1.38 (1.24-1.53)		2426 (2120-2748)	9.03 (8.07-10.05)	7090 (6382-7841)	13.18 (11.83-14.63)	1.25 (1.11-1.38)		128 (119-137)	0.81 (0.75-0.87)	284 (232-342)	0.5 (0.41-0.61)	-1.29 (-1.83--0.74)		8045 (6309-10128)	38.25 (30.87-46.96)	23675 (17763-31176)	43.07 (32.29-56.72)	0.54 (0.38-0.7)
Comoros		195 (165-232)	77.64 (67.3-90.13)	543 (465-639)	92.97 (81.66-107.31)	0.67 (0.58-0.76)		14 (12-17)	4.96 (4.42-5.66)	37 (33-42)	5.84 (5.21-6.55)	0.62 (0.53-0.7)		0 (0-1)	0.04 (0.01-0.34)	0 (0-1)	0.03 (0.01-0.25)	-1.75 (-1.9--1.59)		28 (18-44)	11.18 (7.34-17.63)	76 (50-111)	12.84 (8.64-18.69)	0.52 (0.44-0.6)
Congo		1561 (1346-1794)	115.5 (101.86-130.6)	5543 (4788-6465)	146.05 (129.65-166.05)	0.88 (0.79-0.97)		109 (96-123)	6.93 (6.23-7.65)	391 (347-445)	8.64 (7.8-9.6)	0.85 (0.75-0.94)		1 (0-7)	0.08 (0.03-0.84)	1 (0-11)	0.04 (0.01-0.48)	-2.5 (-2.65--2.35)		229 (152-414)	17.07 (11.43-33.24)	761 (511-1097)	20.01 (13.94-30.13)	0.61 (0.53-0.69)
Cook Islands		8 (6-10)	51.52 (41.04-63.12)	16 (13-19)	73.81 (60.84-89.84)	1.19 (1.13-1.24)		0 (0-1)	2.55 (2.09-3.07)	1 (1-1)	3.57 (3-4.3)	1.13 (1.07-1.19)		0 (0-0)	0 (0-0)	0 (0-0)	0 (0-0)	1.66 (1.05-2.28)		1 (1-2)	7.16 (4.5-10.82)	2 (1-3)	10.06 (6.46-14.81)	1.12 (1.07-1.18)
Costa Rica		4504 (3887-5201)	219.57 (192.79-250.09)	19914 (17687-22473)	363.41 (322.21-411.13)	1.54 (1.47-1.61)		302 (264-341)	12.72 (11.45-14.19)	1095 (984-1214)	20.46 (18.36-22.68)	1.45 (1.38-1.52)		13 (11-14)	0.76 (0.68-0.85)	42 (34-47)	0.74 (0.61-0.85)	-0.25 (-0.4--0.11)		862 (652-1133)	43.71 (33.62-56.69)	3403 (2519-4486)	62 (45.79-81.99)	1.02 (0.95-1.09)
Croatia		3386 (2711-4202)	51.4 (42.71-61.33)	11470 (9271-14065)	65.25 (54.69-77.57)	0.81 (0.69-0.94)		249 (204-299)	3.03 (2.61-3.52)	793 (665-935)	3.77 (3.27-4.3)	0.74 (0.62-0.86)		0 (0-0)	0.01 (0-0.01)	0 (0-1)	0 (0-0.01)	-1.59 (-1.75--1.43)		472 (290-705)	7.08 (4.54-10.55)	1576 (990-2283)	8.82 (5.85-12.52)	0.75 (0.63-0.87)
Cuba		10709 (9156-12505)	174.9 (149.31-204.88)	19084 (16922-21456)	271.62 (235.37-307.58)	1.47 (1.44-1.5)		527 (460-596)	9.06 (7.87-10.37)	793 (701-891)	14.5 (12.74-16.41)	1.55 (1.52-1.59)		26 (24-28)	0.45 (0.41-0.49)	28 (23-32)	0.28 (0.24-0.32)	-1.57 (-2.09--1.04)		2010 (1537-2663)	32.99 (25.28-43.73)	2967 (2133-4017)	41.12 (28.65-56.42)	0.7 (0.58-0.82)
Cyprus		15319 (13230-17754)	143.78 (123.68-165.8)	33733 (29549-38121)	206.01 (178.6-236.86)	1.14 (1.08-1.21)		879 (776-1004)	7.84 (6.96-8.83)	1499 (1324-1691)	10.81 (9.61-12.12)	1.01 (0.95-1.07)		43 (37-47)	0.45 (0.4-0.49)	93 (80-107)	0.45 (0.39-0.52)	-0.32 (-0.64-0)		2957 (2210-3871)	28.25 (21.32-36.46)	6093 (4648-7985)	35.99 (27.18-47.89)	0.7 (0.64-0.76)
Czechia		2496 (2179-2825)	300.65 (261.52-341.14)	7401 (6529-8290)	380.51 (332.7-429.6)	1.05 (0.88-1.22)		163 (145-182)	19.53 (17.36-21.82)	453 (407-506)	24.58 (22.04-27.39)	1.05 (0.88-1.21)		12 (9-17)	2.01 (1.4-2.76)	13 (10-17)	0.69 (0.54-0.89)	-3.58 (-3.83--3.33)		554 (431-693)	71.12 (55.33-89.15)	1191 (881-1553)	61.12 (45.12-80.36)	-0.36 (-0.45--0.27)
C么te d'Ivoire		16655 (14344-19228)	134.95 (115.24-156.75)	29184 (25237-33527)	186.77 (160.27-216.87)	1.01 (0.97-1.05)		746 (645-855)	6.63 (5.69-7.55)	1140 (985-1308)	9.35 (8.11-10.67)	1.07 (1.03-1.11)		33 (30-36)	0.23 (0.21-0.26)	31 (26-38)	0.13 (0.11-0.16)	-1.74 (-2.73--0.75)		2944 (2197-3812)	23.37 (17.2-30.46)	4410 (3160-5944)	27.5 (19.39-38.16)	0.55 (0.44-0.67)
Democratic People's Republic of Korea		29502 (25418-33993)	158.68 (138.7-180.29)	70226 (61902-79306)	209.89 (185.23-237.57)	0.93 (0.89-0.98)		1825 (1608-2057)	9.18 (8.19-10.33)	3989 (3586-4454)	12.19 (11.05-13.59)	0.94 (0.9-0.99)		98 (67-138)	0.74 (0.51-1.03)	227 (163-297)	0.75 (0.54-0.99)	0.23 (0.03-0.42)		6477 (4915-8549)	36.94 (28.41-47.96)	14465 (11121-18424)	43.89 (33.62-55.79)	0.63 (0.56-0.69)
Democratic Republic of the Congo		17332 (14731-20404)	83.54 (73.07-96.49)	50144 (42472-58698)	97.38 (85.55-111.19)	0.47 (0.35-0.59)		1239 (1084-1414)	5.14 (4.6-5.78)	3669 (3201-4176)	5.94 (5.33-6.67)	0.46 (0.35-0.58)		8 (2-84)	0.06 (0.02-0.62)	13 (3-145)	0.04 (0.01-0.5)	-1.3 (-1.37--1.23)		2554 (1652-4923)	12.36 (8.12-25.51)	7075 (4670-11029)	13.73 (9.06-23.14)	0.31 (0.21-0.42)
Denmark		19590 (17890-21569)	264.98 (238.06-293.66)	36270 (33026-39797)	357.98 (320.62-400.92)	1.11 (1.05-1.18)		1211 (1099-1338)	17.74 (16.28-19.45)	2159 (1959-2398)	23.78 (21.63-26.31)	1.08 (1.03-1.14)		54 (49-61)	0.63 (0.57-0.7)	73 (62-83)	0.54 (0.47-0.62)	-0.85 (-1.26--0.43)		3565 (2765-4520)	47.38 (36.48-60.75)	5816 (4353-7517)	55.93 (40.76-74.17)	0.52 (0.43-0.62)
Djibouti		150 (124-182)	71.98 (62.88-83.92)	821 (687-976)	90.95 (79.23-105.09)	0.8 (0.68-0.92)		12 (10-14)	4.66 (4.13-5.27)	59 (51-68)	5.72 (5.06-6.41)	0.7 (0.59-0.81)		0 (0-0)	0.03 (0.01-0.3)	0 (0-1)	0.02 (0.01-0.23)	-1.48 (-1.66--1.31)		22 (14-33)	10.32 (6.82-15.63)	114 (75-166)	12.56 (8.4-17.87)	0.66 (0.55-0.77)
Dominica		64 (54-74)	107.66 (92.2-125.09)	105 (92-120)	133.85 (116.67-153.67)	0.62 (0.53-0.7)		4 (4-5)	6.61 (5.93-7.4)	6 (6-7)	8.15 (7.31-9.13)	0.6 (0.53-0.67)		0 (0-0)	0.59 (0.43-0.74)	0 (0-0)	0.52 (0.4-0.66)	-0.49 (-0.58--0.39)		14 (11-18)	24.17 (18.86-31.05)	20 (16-26)	26.35 (20.17-34.03)	0.18 (0.12-0.25)
Dominican Republic		3515 (2891-4255)	74.97 (63.13-88.25)	10502 (8905-12407)	98.54 (83.95-116.17)	0.89 (0.84-0.94)		265 (231-306)	5.25 (4.67-5.88)	695 (611-790)	6.54 (5.79-7.35)	0.68 (0.6-0.76)		19 (12-26)	0.82 (0.48-1.14)	46 (31-62)	0.48 (0.32-0.65)	-0.76 (-1.19--0.33)		856 (652-1108)	21.52 (16.46-27.34)	2102 (1597-2742)	20.12 (15.38-26.08)	0.23 (0.05-0.41)
Ecuador		13100 (11380-15101)	199.87 (176.78-226.89)	56388 (49555-63584)	328.58 (290.45-368.91)	1.53 (1.44-1.63)		916 (818-1031)	12.46 (11.33-13.74)	3423 (3111-3786)	19.4 (17.68-21.42)	1.35 (1.26-1.44)		53 (48-57)	1.17 (1.07-1.27)	111 (90-134)	0.77 (0.63-0.92)	-1.32 (-1.77--0.88)		2892 (2293-3608)	47.04 (38.32-57.36)	9402 (6856-12320)	55.77 (41.13-72.54)	0.46 (0.31-0.61)
Egypt		27992 (23089-33652)	67.35 (56.33-80.16)	101180 (84524-121306)	110.53 (93.64-131.14)	1.49 (1.42-1.57)		1646 (1384-1951)	3.23 (2.77-3.79)	5461 (4639-6337)	5.29 (4.55-6.1)	1.5 (1.43-1.57)		23 (16-30)	0.1 (0.07-0.14)	38 (29-49)	0.07 (0.05-0.09)	-0.81 (-0.98--0.64)		4476 (3087-6228)	11.33 (8.13-15.55)	14754 (9970-20575)	16.36 (11.21-22.5)	1.18 (1.12-1.23)
El Salvador		3431 (2906-4053)	95.68 (80.97-111.62)	9439 (8153-10988)	152.47 (131.88-177.36)	1.58 (1.46-1.7)		225 (194-261)	5.42 (4.71-6.16)	530 (464-602)	8.32 (7.33-9.44)	1.46 (1.35-1.57)		8 (5-10)	0.27 (0.19-0.37)	15 (11-20)	0.22 (0.17-0.29)	-0.53 (-0.69--0.37)		630 (464-865)	18.23 (13.58-24.76)	1532 (1099-2066)	24.63 (17.62-33.34)	1.04 (0.99-1.1)
Equatorial Guinea		212 (179-246)	86.75 (75.83-99.01)	1213 (1026-1430)	155.44 (137.26-176.62)	2.31 (2.13-2.49)		15 (13-17)	5.4 (4.83-6.01)	91 (79-106)	9.04 (8.08-10.12)	2.03 (1.87-2.18)		0 (0-1)	0.08 (0.02-0.8)	0 (0-2)	0.04 (0.01-0.39)	-2.95 (-3.12--2.78)		32 (21-70)	13.15 (8.79-31.42)	166 (109-240)	20.99 (14.27-30.24)	1.89 (1.73-2.04)
Eritrea		1200 (1000-1416)	72.23 (63.43-82.83)	3353 (2857-3974)	86.12 (75.82-98.45)	0.53 (0.51-0.56)		94 (83-107)	4.71 (4.27-5.24)	257 (227-290)	5.55 (4.98-6.16)	0.51 (0.48-0.54)		0 (0-3)	0.04 (0.01-0.4)	1 (0-7)	0.03 (0.01-0.33)	-1.28 (-1.35--1.2)		176 (114-274)	10.58 (6.99-18.47)	469 (298-701)	11.93 (7.92-17.9)	0.36 (0.33-0.38)
Estonia		5407 (4879-6069)	279.65 (250.18-316.59)	7052 (6400-7731)	355.21 (315.79-399.9)	1.15 (1-1.31)		239 (216-264)	13.86 (12.44-15.43)	266 (240-292)	17.72 (15.93-19.7)	1.14 (0.99-1.29)		16 (14-18)	0.78 (0.68-0.88)	18 (15-20)	0.67 (0.58-0.78)	-1.39 (-2.09--0.7)		1142 (890-1421)	58.92 (45.61-73.9)	1313 (1008-1669)	64.26 (48.38-83.36)	0.24 (0.1-0.38)
Eswatini		749 (629-870)	175.33 (151.84-199.05)	1656 (1400-1918)	201.25 (176.86-228.12)	0.4 (0.24-0.56)		52 (45-60)	9.55 (8.47-10.69)	109 (95-125)	10.8 (9.69-11.98)	0.38 (0.22-0.54)		2 (1-3)	0.89 (0.3-1.29)	4 (1-6)	0.73 (0.16-1.21)	-0.59 (-1.04--0.15)		170 (121-223)	43.82 (31.2-56.28)	321 (222-437)	42.74 (29.1-57.49)	-0.13 (-0.31-0.04)
Ethiopia		21323 (17895-25509)	81.6 (70.18-95.79)	47202 (39329-56480)	77.14 (66.34-90.38)	-0.04 (-0.12-0.04)		1579 (1367-1830)	5.14 (4.5-5.88)	3543 (3045-4118)	4.87 (4.28-5.55)	-0.05 (-0.12-0.03)		8 (3-67)	0.05 (0.02-0.42)	8 (3-75)	0.02 (0.01-0.19)	-3.48 (-3.68--3.28)		3109 (2052-5013)	11.87 (8.04-20.07)	6614 (4366-9558)	10.66 (7.21-15.33)	-0.24 (-0.31--0.17)
Fiji		244 (191-304)	41.58 (33.04-51.14)	474 (386-585)	51.84 (42.29-63.83)	0.72 (0.59-0.84)		15 (12-18)	2.08 (1.69-2.5)	24 (20-29)	2.52 (2.1-3.05)	0.65 (0.51-0.79)		0 (0-0)	0 (0-0)	0 (0-0)	0 (0-0)	-3.83 (-4.34--3.32)		35 (21-51)	5.86 (3.65-8.61)	66 (42-98)	7.23 (4.6-10.66)	0.68 (0.57-0.8)
Finland		24239 (21874-26800)	363.73 (327.33-404.48)	45316 (41322-49641)	458.5 (414.25-513.17)	0.93 (0.84-1.02)		1424 (1308-1552)	22.77 (20.86-24.87)	2344 (2126-2583)	28.33 (25.67-31.39)	0.88 (0.81-0.96)		135 (120-146)	1.86 (1.65-2.01)	111 (94-124)	0.76 (0.66-0.85)	-3.31 (-3.49--3.14)		5618 (4575-6876)	82.15 (66.22-101.77)	7637 (5783-9885)	74.52 (55.66-98.81)	-0.31 (-0.34--0.28)
France		133296 (118198-150457)	178.96 (157.03-204.55)	237084 (211108-267076)	218.76 (191.21-251.05)	0.77 (0.67-0.88)		8101 (7288-8891)	11.51 (10.36-12.78)	13423 (12040-15099)	13.85 (12.37-15.61)	0.72 (0.6-0.83)		493 (435-543)	0.55 (0.49-0.6)	436 (356-500)	0.26 (0.21-0.29)	-2.41 (-2.66--2.16)		26003 (20432-32793)	33.86 (26.28-43.43)	37301 (27977-48896)	33.42 (24.5-44.83)	0.09 (0.01-0.16)
Gabon		742 (644-850)	116.18 (102.92-131.53)	2212 (1911-2549)	167.29 (148.22-189.77)	1.24 (1.17-1.31)		49 (44-55)	7.09 (6.39-7.86)	149 (133-166)	9.86 (8.95-10.87)	1.11 (1.05-1.17)		0 (0-4)	0.07 (0.02-0.74)	0 (0-4)	0.04 (0.01-0.46)	-2.2 (-2.4--1.99)		108 (72-190)	16.92 (11.38-30.69)	300 (200-428)	22.61 (15.24-32.84)	0.98 (0.92-1.04)
Gambia		265 (213-331)	49.77 (41.33-60.19)	928 (762-1141)	64.19 (54.25-76.98)	0.9 (0.82-0.99)		19 (16-23)	2.94 (2.53-3.43)	65 (55-78)	3.69 (3.23-4.23)	0.8 (0.72-0.88)		0 (0-0)	0.01 (0-0.02)	0 (0-0)	0.01 (0-0.01)	-1.48 (-1.64--1.32)		37 (24-57)	6.92 (4.52-10.46)	127 (82-184)	8.68 (5.74-12.32)	0.82 (0.74-0.89)
Georgia		4968 (4088-6088)	82.28 (67.7-101.67)	4591 (3933-5445)	97.82 (82.42-117.66)	0.54 (0.45-0.63)		235 (200-280)	4.07 (3.42-4.84)	189 (163-218)	4.83 (4.14-5.63)	0.53 (0.45-0.62)		0 (0-0)	0 (0-0)	3 (3-3)	0.05 (0.04-0.05)	6.86 (4.71-9.05)		678 (429-992)	11.26 (7.15-16.52)	662 (457-926)	14.02 (9.43-19.91)	0.86 (0.72-1)
Germany		221571 (193489-253604)	202.55 (174.25-234.58)	327819 (287458-374136)	237.71 (202.99-278.07)	0.51 (0.42-0.61)		11640 (10392-13077)	11.56 (10.25-12.99)	15883 (14213-17710)	13.4 (11.84-15.08)	0.46 (0.35-0.57)		685 (592-767)	0.52 (0.45-0.58)	578 (476-664)	0.26 (0.22-0.29)	-2.17 (-2.92--1.42)		40346 (30447-52047)	35.64 (26.5-46.59)	51736 (38171-69506)	36.04 (25.71-49.35)	0.09 (0.04-0.14)
Ghana		4198 (3367-5230)	46.93 (38.27-57.02)	16404 (13475-19853)	67.82 (56.28-81.19)	1.22 (1.1-1.33)		292 (241-351)	2.72 (2.29-3.21)	1072 (894-1275)	3.8 (3.27-4.44)	1.08 (0.97-1.19)		0 (0-1)	0.01 (0-0.01)	5 (2-11)	0.06 (0.02-0.12)	11.75 (9.16-14.39)		588 (371-866)	6.51 (4.15-9.55)	2319 (1472-3388)	9.86 (6.39-14.1)	1.57 (1.43-1.72)
Greece		25388 (21975-28994)	192.64 (165.72-219.51)	35647 (31188-40160)	225.9 (195.09-257.21)	0.53 (0.51-0.54)		1253 (1097-1415)	10.4 (9.07-11.76)	1551 (1366-1744)	11.97 (10.46-13.46)	0.46 (0.44-0.48)		25 (23-27)	0.17 (0.15-0.18)	46 (39-51)	0.17 (0.14-0.18)	-0.08 (-0.82-0.67)		3832 (2729-5188)	28.78 (20.31-39.06)	5425 (3867-7217)	33.25 (23.03-45.3)	0.48 (0.41-0.54)
Greenland		65 (55-76)	138.07 (118.93-158.48)	157 (139-177)	218.15 (194-245.77)	1.62 (1.59-1.66)		4 (4-5)	8.48 (7.49-9.48)	9 (8-10)	13.29 (11.97-14.59)	1.58 (1.55-1.61)		0 (0-0)	0.45 (0.34-0.63)	0 (0-0)	0.34 (0.23-0.61)	-0.35 (-0.56--0.15)		12 (9-16)	28.02 (21.29-36.91)	26 (19-35)	36.28 (25.98-48.79)	1.09 (1-1.18)
Grenada		48 (41-57)	70.22 (58.97-83.44)	123 (104-145)	107.81 (91.79-126.84)	1.21 (1.09-1.32)		3 (3-3)	3.97 (3.44-4.55)	7 (6-8)	5.99 (5.27-6.78)	1.15 (1.03-1.27)		0 (0-0)	0.22 (0.18-0.26)	0 (0-0)	0.27 (0.23-0.32)	1.56 (1.27-1.85)		9 (7-12)	13.34 (9.94-17.81)	20 (14-27)	18.31 (13.29-24.34)	1.07 (0.98-1.17)
Guam		68 (55-84)	57.99 (47.41-70.67)	146 (122-175)	79.01 (65.36-95.03)	1.03 (0.94-1.12)		4 (3-5)	2.87 (2.41-3.4)	6 (6-7)	3.86 (3.29-4.52)	0.97 (0.87-1.07)		0 (0-0)	0 (0-0)	0 (0-0)	0 (0-0)	-5.16 (-7.62--2.64)		10 (6-14)	8.08 (5.2-11.68)	20 (13-29)	10.85 (6.84-15.68)	0.99 (0.9-1.08)
Guatemala		5026 (4242-5843)	108.63 (93.88-124)	24898 (21804-28741)	196.6 (174.49-224)	1.82 (1.68-1.95)		358 (304-406)	6.7 (5.97-7.45)	1608 (1440-1802)	11.61 (10.5-12.73)	1.67 (1.54-1.79)		20 (18-23)	0.7 (0.64-0.76)	63 (55-73)	0.64 (0.55-0.73)	0.06 (-0.32-0.43)		1291 (1043-1604)	29.62 (24.67-35.87)	4731 (3637-6102)	38.66 (30.14-48.94)	0.91 (0.77-1.05)
Guinea		1894 (1546-2302)	47.91 (39.79-57.53)	4523 (3726-5510)	56.57 (47.74-67.71)	0.53 (0.44-0.63)		125 (106-147)	2.83 (2.44-3.26)	316 (266-374)	3.28 (2.85-3.78)	0.5 (0.4-0.59)		0 (0-0)	0.01 (0-0.01)	0 (0-0)	0.01 (0-0.01)	-1.57 (-1.76--1.37)		264 (172-388)	6.67 (4.39-9.82)	625 (404-913)	7.74 (4.99-11.14)	0.49 (0.4-0.58)
Guinea-Bissau		270 (219-332)	47.84 (40.32-57.59)	693 (560-863)	57.88 (48.78-69.68)	0.63 (0.53-0.74)		19 (16-23)	2.83 (2.44-3.26)	50 (41-60)	3.35 (2.91-3.85)	0.56 (0.46-0.67)		0 (0-0)	0.01 (0.01-0.02)	0 (0-0)	0.01 (0-0.01)	-1.98 (-2.19--1.77)		38 (24-56)	6.7 (4.4-9.85)	96 (62-144)	7.94 (5.21-11.52)	0.55 (0.45-0.66)
Guyana		342 (282-419)	63.32 (53.1-76.13)	634 (531-758)	87.42 (73.88-103.73)	0.96 (0.89-1.02)		23 (19-27)	3.6 (3.1-4.15)	36 (31-41)	4.88 (4.26-5.56)	0.89 (0.82-0.97)		0 (0-0)	0.02 (0.02-0.03)	1 (1-1)	0.2 (0.16-0.24)	5.26 (2.66-7.94)		48 (32-72)	8.9 (5.87-13.1)	108 (79-146)	15.35 (11.42-20.39)	1.42 (1.02-1.82)
Haiti		3301 (2779-3901)	78.93 (68.52-90.84)	9806 (8357-11506)	98.31 (86.06-112.35)	0.71 (0.65-0.76)		224 (194-257)	4.84 (4.34-5.41)	631 (552-714)	5.81 (5.23-6.43)	0.59 (0.55-0.63)		19 (11-32)	0.82 (0.49-1.31)	34 (19-61)	0.61 (0.34-1.06)	-0.9 (-0.94--0.86)		992 (688-1420)	26.84 (19.03-37.31)	2262 (1560-3300)	25.45 (17.89-37.57)	-0.12 (-0.16--0.08)
Honduras		5993 (5278-6845)	232.68 (208.52-260.86)	28193 (25366-31256)	368.31 (335.42-403.52)	1.39 (1.31-1.47)		419 (372-470)	13.7 (12.51-15.03)	1828 (1660-2017)	20.92 (19.06-22.9)	1.28 (1.21-1.35)		24 (15-37)	1.38 (0.83-2.25)	90 (61-130)	1.65 (1.1-2.33)	0.61 (0.44-0.78)		1441 (1101-1856)	59.75 (45.7-77.4)	5825 (4450-7578)	81.42 (63.33-105.19)	0.97 (0.88-1.05)
Hungary		24817 (22000-27714)	183.04 (161.04-206.12)	35147 (31307-38945)	228.38 (200.03-255.84)	0.74 (0.6-0.87)		1188 (1066-1317)	9.79 (8.76-10.85)	1495 (1326-1664)	12.18 (10.76-13.54)	0.72 (0.59-0.86)		92 (83-104)	0.63 (0.57-0.7)	61 (48-75)	0.29 (0.23-0.36)	-2.88 (-3.41--2.35)		5351 (4307-6615)	38.64 (30.96-48.08)	5801 (4331-7582)	36.47 (26.66-48.53)	-0.29 (-0.4--0.19)
Iceland		630 (542-727)	234.81 (200.94-272.81)	1315 (1150-1511)	275.2 (236.58-319.89)	0.58 (0.52-0.64)		36 (32-41)	13.65 (11.98-15.41)	69 (62-77)	15.82 (13.98-17.85)	0.52 (0.46-0.58)		1 (1-2)	0.49 (0.44-0.54)	2 (1-2)	0.25 (0.21-0.29)	-1.75 (-1.99--1.51)		111 (82-148)	40.68 (29.94-54.75)	200 (143-270)	41.15 (28.94-56.37)	0.17 (0.12-0.22)
India		818573 (697518-969037)	148.83 (129.7-173.4)	2766749 (2412596-3215435)	216.1 (190.08-248.13)	1.32 (1.2-1.43)		63047 (54893-72108)	10.61 (9.28-12.1)	198511 (174796-226624)	14.82 (13.07-16.89)	1.17 (1.08-1.25)		2909 (2005-4205)	0.86 (0.58-1.27)	7679 (5625-11356)	0.76 (0.55-1.15)	-0.24 (-0.4--0.08)		169250 (128067-218649)	34.73 (26.41-44.44)	503360 (382564-638990)	40.88 (31.65-51.51)	0.6 (0.52-0.69)
Indonesia		48642 (39082-60783)	36.17 (29.54-44.3)	132985 (110107-160979)	46.19 (38.7-55.4)	0.74 (0.69-0.78)		3178 (2659-3850)	2.05 (1.75-2.43)	7807 (6661-9147)	2.69 (2.31-3.12)	0.78 (0.72-0.83)		84 (39-121)	0.11 (0.05-0.16)	253 (103-339)	0.15 (0.06-0.21)	1.04 (0.88-1.21)		9017 (6376-12552)	7.26 (5.21-9.97)	24094 (17153-32774)	9.06 (6.46-12.14)	0.7 (0.68-0.73)
Iran (Islamic Republic of)		23673 (19341-28739)	63.65 (52.75-76.04)	84200 (70272-100280)	89.25 (74.81-105.83)	1.1 (1.08-1.13)		1479 (1226-1757)	3.12 (2.65-3.63)	3919 (3281-4569)	4.22 (3.6-4.88)	0.96 (0.93-1)		13 (10-18)	0.05 (0.04-0.07)	40 (30-51)	0.05 (0.04-0.07)	0.86 (0.61-1.1)		3665 (2474-5108)	9.9 (6.84-13.73)	12315 (8455-17439)	13.21 (9.17-18.55)	1.03 (1-1.07)
Iraq		8840 (7168-10928)	74.35 (61.71-89.89)	36928 (30224-44060)	104.95 (87.42-123.68)	1.3 (1.12-1.47)		564 (466-681)	3.53 (2.99-4.14)	2069 (1712-2391)	5.04 (4.23-5.74)	1.34 (1.17-1.51)		4 (3-5)	0.04 (0.03-0.06)	6 (5-9)	0.03 (0.02-0.04)	-1.87 (-1.99--1.75)		1334 (892-1884)	11.27 (7.68-15.68)	5142 (3486-7276)	14.6 (9.99-20.44)	0.96 (0.8-1.12)
Ireland		17276 (15621-19060)	442.42 (395.96-491.24)	38691 (34897-42910)	539.08 (481.75-605.19)	0.85 (0.7-1.01)		1055 (963-1157)	28.64 (26.23-31.52)	2334 (2112-2589)	35.08 (31.79-38.82)	0.88 (0.74-1.03)		62 (57-68)	1.5 (1.38-1.63)	57 (48-64)	0.68 (0.57-0.76)	-2.25 (-2.49--2.02)		3462 (2757-4309)	87.09 (69.15-109.53)	5988 (4398-7865)	82.49 (59.97-110.57)	0.05 (-0.03-0.14)
Israel		7778 (6603-9200)	165.59 (139.91-196.23)	22759 (19637-26398)	212.95 (181.42-249.28)	0.9 (0.86-0.94)		455 (398-518)	9.49 (8.26-10.84)	1257 (1117-1419)	12.21 (10.76-13.93)	0.89 (0.86-0.93)		12 (10-13)	0.24 (0.21-0.27)	22 (19-25)	0.17 (0.14-0.19)	-1.62 (-1.9--1.34)		1261 (896-1716)	26.66 (18.91-36.48)	3381 (2406-4605)	31.31 (21.88-43.14)	0.51 (0.47-0.55)
Italy		195258 (169005-226643)	244.99 (210.55-287.56)	262965 (229881-301168)	240.46 (207.85-280.98)	-0.03 (-0.05--0.01)		10880 (9361-12517)	14.75 (12.75-16.93)	13912 (12040-16000)	14.84 (12.99-16.96)	0.05 (0.04-0.07)		386 (350-410)	0.42 (0.38-0.44)	599 (494-664)	0.34 (0.29-0.37)	-1.04 (-1.26--0.83)		33025 (24976-42842)	40.72 (30.16-53.5)	43048 (32437-56503)	37.75 (27.68-50.63)	-0.3 (-0.33--0.27)
Jamaica		1697 (1435-1981)	91.85 (77.43-107.06)	4012 (3426-4634)	129.43 (110.37-149.47)	1.04 (0.95-1.14)		112 (97-127)	5.41 (4.77-6.13)	224 (198-252)	7.35 (6.51-8.24)	0.92 (0.83-1.02)		5 (5-6)	0.29 (0.25-0.33)	11 (9-14)	0.34 (0.26-0.43)	0.45 (0.2-0.7)		320 (239-418)	17.37 (12.96-22.56)	737 (552-977)	23.61 (17.64-31.33)	0.89 (0.75-1.03)
Japan		525814 (458565-609513)	313.78 (274.11-363.08)	695658 (618011-790455)	281.83 (244.62-326.11)	-0.18 (-0.29--0.07)		31521 (27206-36783)	19.37 (16.8-22.3)	32060 (27599-37008)	17.03 (14.93-19.33)	-0.25 (-0.35--0.14)		1550 (1424-1623)	0.94 (0.85-0.98)	2212 (1799-2470)	0.47 (0.4-0.52)	-2.74 (-3.26--2.22)		100775 (79027-129605)	60.03 (46.97-77.03)	122654 (93499-158301)	45.77 (33.52-61.3)	-0.85 (-0.91--0.79)
Jordan		1668 (1347-2036)	71.21 (59.12-85.07)	12316 (10248-14925)	109.67 (92.84-130.8)	1.68 (1.58-1.79)		112 (91-136)	3.41 (2.9-3.97)	673 (566-795)	5.23 (4.48-6.08)	1.65 (1.55-1.76)		1 (0-1)	0.04 (0.03-0.07)	3 (2-4)	0.04 (0.03-0.06)	0.63 (0.21-1.05)		247 (164-363)	10.7 (7.23-15.36)	1744 (1149-2497)	15.61 (10.4-22.07)	1.53 (1.41-1.65)
Kazakhstan		11133 (9192-13775)	75.82 (62.94-92.89)	20698 (17060-24621)	104.69 (86.57-124.15)	1.29 (1.04-1.55)		596 (498-706)	3.74 (3.13-4.42)	998 (852-1164)	5.14 (4.36-5.99)	1.28 (1.03-1.53)		1 (1-1)	0.01 (0.01-0.01)	30 (24-36)	0.21 (0.16-0.26)	8.64 (5.02-12.39)		1544 (993-2276)	10.47 (6.77-15.38)	3513 (2544-4780)	18.27 (13.37-24.74)	1.82 (1.3-2.34)
Kenya		8665 (7214-10433)	79.67 (68.66-94.08)	28138 (23691-33665)	90.38 (78.43-105.67)	0.35 (0.27-0.43)		668 (573-786)	5.15 (4.48-5.95)	2076 (1802-2410)	5.79 (5.12-6.62)	0.3 (0.23-0.37)		2 (1-19)	0.03 (0.01-0.25)	4 (1-41)	0.02 (0.01-0.23)	-0.62 (-0.68--0.57)		1230 (813-1801)	11.17 (7.51-16.44)	3913 (2611-5622)	12.42 (8.44-18.19)	0.31 (0.23-0.39)
Kiribati		23 (19-28)	41.52 (34.27-50.61)	51 (42-62)	49.37 (41.55-59.26)	0.49 (0.44-0.55)		1 (1-2)	2.08 (1.76-2.46)	3 (2-3)	2.43 (2.08-2.85)	0.46 (0.41-0.51)		0 (0-0)	0 (0-0)	0 (0-0)	0 (0-0)	-0.88 (-0.95--0.8)		3 (2-5)	5.85 (3.79-8.86)	7 (5-10)	6.91 (4.47-9.98)	0.47 (0.42-0.52)
Kuwait		2194 (1760-2658)	143.64 (120.12-168.91)	13734 (11365-16081)	237.27 (201.86-275.25)	2.03 (1.79-2.28)		134 (111-160)	7.01 (5.93-8.19)	578 (483-678)	10.8 (9.2-12.22)	1.8 (1.57-2.03)		0 (0-0)	0.04 (0.03-0.05)	4 (3-5)	0.15 (0.11-0.2)	3.01 (1.83-4.21)		306 (205-440)	20.23 (13.73-28.47)	1951 (1308-2728)	34.78 (23.85-47.95)	2.03 (1.91-2.15)
Kyrgyzstan		7437 (6479-8541)	226.46 (198.4-256.29)	18892 (16588-21468)	329.66 (293.56-368.09)	1.31 (1.17-1.45)		433 (381-489)	11.67 (10.51-12.94)	1073 (961-1187)	17.27 (15.64-18.89)	1.31 (1.21-1.41)		7 (5-9)	0.26 (0.2-0.34)	18 (14-24)	0.46 (0.34-0.62)	3.76 (2.68-4.86)		1157 (822-1570)	35.47 (25.33-48.18)	2963 (2142-4065)	52.67 (38.46-71.36)	1.74 (1.47-2.02)
Lao People's Democratic Republic		1297 (1063-1579)	48.14 (40.6-57.3)	4306 (3610-5167)	71.72 (61.27-84.25)	1.36 (1.29-1.43)		87 (75-102)	2.8 (2.45-3.2)	277 (241-318)	4.2 (3.72-4.79)	1.35 (1.28-1.42)		6 (3-8)	0.37 (0.21-0.52)	10 (5-14)	0.3 (0.16-0.41)	-0.84 (-0.93--0.76)		331 (246-441)	13.94 (10.3-18.35)	815 (594-1107)	15 (11.07-19.73)	0.17 (0.13-0.2)
Latvia		7111 (6330-7915)	213.5 (188.09-240.56)	7636 (6894-8400)	265.76 (234.33-297.24)	0.81 (0.73-0.89)		302 (275-333)	10.44 (9.39-11.6)	273 (246-299)	13.07 (11.67-14.44)	0.8 (0.73-0.88)		21 (18-23)	0.58 (0.5-0.65)	22 (19-25)	0.58 (0.5-0.67)	-0.85 (-1.5--0.2)		1507 (1191-1897)	44.92 (35.43-56.84)	1506 (1177-1919)	50.43 (38.62-65.19)	0.14 (-0.09-0.37)
Lebanon		2930 (2441-3456)	112.77 (94.69-132.43)	9827 (8302-11500)	162.48 (137.75-189.59)	1.36 (1.23-1.48)		149 (127-175)	5.12 (4.38-5.97)	421 (358-491)	7.12 (6.08-8.22)	1.23 (1.1-1.35)		2 (1-3)	0.11 (0.07-0.16)	3 (2-4)	0.05 (0.04-0.07)	-2.22 (-2.38--2.07)		459 (327-632)	17.87 (12.85-24.41)	1365 (923-1903)	22.57 (15.31-31.58)	0.97 (0.83-1.11)
Lesotho		1430 (1225-1660)	142.28 (122.87-163.41)	2390 (2053-2748)	169.68 (148.53-191.53)	0.4 (0.28-0.51)		90 (79-102)	7.89 (7.02-8.8)	154 (135-173)	9.26 (8.3-10.19)	0.36 (0.25-0.47)		4 (2-6)	0.58 (0.25-0.84)	7 (2-10)	0.71 (0.2-1.02)	1.17 (0.75-1.6)		306 (227-403)	31.86 (23.68-41.45)	497 (356-650)	38.05 (26.38-49)	0.69 (0.53-0.85)
Liberia		786 (651-974)	51.86 (43.11-62.77)	2353 (1880-2871)	66.4 (55.27-78.94)	1.04 (0.87-1.21)		54 (45-65)	2.99 (2.57-3.48)	161 (132-192)	3.73 (3.2-4.26)	0.9 (0.75-1.05)		0 (0-0)	0.01 (0-0.02)	0 (0-0)	0.01 (0-0.01)	-1.87 (-2.02--1.73)		109 (71-160)	7.11 (4.67-10.41)	320 (204-463)	8.87 (5.76-12.7)	0.95 (0.79-1.11)
Libya		1880 (1541-2267)	66.05 (55.31-78.95)	7248 (6035-8649)	96.82 (82.32-114.41)	1.41 (1.35-1.48)		123 (102-147)	3.22 (2.75-3.79)	355 (302-412)	4.6 (3.94-5.31)	1.29 (1.24-1.35)		1 (1-2)	0.05 (0.04-0.08)	7 (4-10)	0.13 (0.08-0.2)	3.98 (3.7-4.26)		291 (196-415)	10.37 (7.19-14.58)	1184 (839-1654)	16.38 (11.87-22.54)	1.76 (1.68-1.85)
Lithuania		11234 (10079-12571)	262.21 (233.31-294.94)	13205 (12075-14540)	315.04 (281.51-355.59)	0.58 (0.54-0.62)		490 (444-538)	12.6 (11.39-13.96)	461 (419-505)	15.3 (13.8-17.03)	0.61 (0.58-0.64)		32 (28-36)	0.71 (0.63-0.81)	45 (38-51)	0.82 (0.7-0.95)	-0.32 (-0.9-0.26)		2362 (1832-2992)	54.96 (42.6-69.53)	2776 (2178-3469)	63.55 (49.07-81.41)	0.2 (0.03-0.37)
Luxembourg		1015 (879-1173)	204.26 (174.93-238)	2186 (1894-2506)	238.41 (204.86-273.65)	0.59 (0.52-0.67)		55 (49-62)	11.78 (10.46-13.23)	116 (102-131)	13.8 (12.2-15.44)	0.6 (0.51-0.68)		3 (2-3)	0.45 (0.41-0.5)	2 (2-3)	0.2 (0.17-0.23)	-2.26 (-2.52--1.99)		181 (136-238)	35.75 (26.69-47.5)	326 (230-448)	35.21 (24.48-49.12)	0.1 (0.05-0.16)
Madagascar		4113 (3468-4900)	63.25 (54.37-73.8)	12257 (10245-14643)	75.05 (65.69-86.92)	0.55 (0.5-0.59)		301 (260-351)	4.03 (3.59-4.58)	911 (795-1047)	4.72 (4.19-5.3)	0.49 (0.45-0.53)		1 (0-12)	0.03 (0.01-0.28)	2 (0-18)	0.02 (0.01-0.2)	-1.86 (-1.94--1.77)		600 (386-935)	9.2 (6.13-14.59)	1721 (1143-2530)	10.4 (7.12-15.06)	0.4 (0.35-0.45)
Malawi		3872 (3238-4573)	76.49 (66.25-88.02)	9734 (8309-11589)	94.57 (83.08-108.77)	0.74 (0.66-0.81)		289 (252-334)	4.91 (4.41-5.54)	738 (641-851)	5.94 (5.33-6.63)	0.66 (0.59-0.73)		1 (0-13)	0.04 (0.01-0.39)	2 (1-20)	0.03 (0.01-0.33)	-1.46 (-1.67--1.25)		559 (360-885)	11 (7.09-18.06)	1368 (916-2014)	13.15 (9.01-19.44)	0.6 (0.54-0.65)
Malaysia		4690 (3809-5823)	37.31 (30.66-45.4)	16439 (13654-19754)	51.04 (42.63-60.94)	1.06 (1.02-1.1)		307 (257-369)	2.12 (1.79-2.5)	943 (807-1103)	2.85 (2.45-3.31)	1.01 (0.97-1.05)		7 (5-9)	0.09 (0.06-0.11)	14 (11-19)	0.06 (0.05-0.08)	-1.19 (-1.5--0.87)		813 (578-1119)	6.86 (4.97-9.16)	2545 (1712-3601)	8.05 (5.51-11.33)	0.52 (0.46-0.57)
Maldives		97 (81-114)	75.41 (64.1-87.85)	512 (425-607)	105 (90.61-122.08)	1.33 (0.99-1.67)		7 (6-8)	4.29 (3.8-4.83)	32 (27-37)	5.7 (5.01-6.43)	1.15 (0.83-1.47)		0 (0-0)	0.33 (0.25-0.45)	0 (0-1)	0.18 (0.14-0.22)	-2.23 (-2.37--2.1)		21 (15-29)	17.79 (13.25-22.92)	80 (55-115)	17.23 (12.52-23.41)	0.03 (-0.15-0.22)
Mali		2328 (1893-2882)	44.23 (36.73-53.12)	7105 (5716-8676)	54.06 (45.15-64.48)	0.73 (0.64-0.82)		158 (133-188)	2.6 (2.22-3.02)	507 (419-602)	3.1 (2.66-3.55)	0.65 (0.57-0.74)		0 (0-1)	0.01 (0-0.02)	0 (0-1)	0.01 (0-0.01)	-1.38 (-1.46--1.31)		327 (205-480)	6.22 (4-8.94)	988 (628-1457)	7.44 (4.87-10.66)	0.65 (0.57-0.74)
Malta		802 (685-922)	190.59 (162.81-219.55)	1608 (1419-1841)	227.49 (195.25-264.88)	0.57 (0.5-0.65)		45 (40-51)	10.96 (9.65-12.34)	78 (69-86)	12.88 (11.35-14.51)	0.53 (0.46-0.6)		2 (2-2)	0.43 (0.4-0.47)	2 (2-3)	0.23 (0.19-0.26)	-2.29 (-2.5--2.07)		142 (105-186)	33.69 (24.89-44.18)	253 (184-342)	34.54 (24.2-47.95)	0.09 (0.04-0.13)
Marshall Islands		13 (11-16)	50.74 (42.25-60.3)	33 (28-40)	66.75 (56.69-78.23)	0.85 (0.78-0.92)		1 (1-1)	2.64 (2.28-3.02)	2 (2-2)	3.44 (2.99-3.9)	0.82 (0.76-0.88)		0 (0-0)	0 (0-0.01)	0 (0-0)	0 (0-0)	-0.3 (-0.53--0.07)		2 (1-3)	7.03 (4.57-10.41)	5 (3-7)	9.13 (6.07-13.19)	0.79 (0.72-0.85)
Mauritania		712 (587-865)	55.84 (46.61-66.78)	2256 (1849-2716)	79.54 (67.1-94.12)	1.15 (1.05-1.25)		48 (41-56)	3.21 (2.78-3.69)	151 (128-176)	4.53 (3.94-5.18)	1.1 (1.01-1.19)		0 (0-0)	0.01 (0-0.02)	0 (0-0)	0.01 (0-0.01)	-2.73 (-2.93--2.53)		100 (64-146)	7.8 (5.03-11.14)	309 (199-450)	10.77 (7.08-15.66)	1.06 (0.96-1.15)
Mauritius		561 (468-683)	62.95 (53.48-75.79)	1658 (1411-1952)	95.77 (81.01-113.37)	1.21 (1.14-1.28)		36 (30-42)	3.62 (3.12-4.21)	88 (76-102)	5.42 (4.72-6.19)	1.12 (1.04-1.2)		0 (0-0)	0.02 (0.02-0.02)	6 (5-6)	0.32 (0.29-0.35)	5.73 (3.2-8.33)		79 (51-117)	8.83 (5.8-12.83)	330 (253-430)	18.98 (14.43-24.8)	1.81 (1.24-2.39)
Mexico		208842 (180534-237106)	399.05 (349.24-449.58)	610759 (539631-685243)	452.74 (400.81-506.18)	0.35 (0.25-0.45)		14454 (12732-16243)	23.52 (20.79-26.56)	34430 (30640-38699)	25.32 (22.62-28.44)	0.21 (0.14-0.29)		775 (740-801)	2.25 (2.13-2.33)	1562 (1350-1772)	1.3 (1.13-1.47)	-1.65 (-1.82--1.48)		44837 (36180-56355)	92.44 (76.01-113.37)	116291 (90409-147587)	87.45 (68.51-110.52)	-0.17 (-0.23--0.1)
Micronesia (Federated States of)		38 (31-46)	56.61 (47.53-67)	76 (63-90)	80.61 (68.22-94.85)	1.11 (1.05-1.16)		2 (2-3)	2.9 (2.49-3.32)	4 (4-5)	4.04 (3.5-4.58)	1.04 (1-1.08)		0 (0-0)	0 (0-0.01)	0 (0-0)	0 (0-0)	-0.88 (-1--0.76)		5 (4-8)	7.86 (5.26-11.89)	10 (7-15)	10.99 (7.17-15.84)	1.04 (0.99-1.09)
Monaco		72 (61-85)	154.82 (129.73-185.41)	102 (86-119)	170.9 (142.61-200.59)	0.43 (0.32-0.55)		3 (3-4)	8.13 (7.01-9.5)	4 (4-5)	8.82 (7.56-10.21)	0.38 (0.26-0.51)		0 (0-0)	0.03 (0.02-0.04)	0 (0-0)	0.02 (0.01-0.03)	-0.67 (-0.76--0.57)		10 (7-14)	21.36 (14.31-30.29)	14 (9-19)	23.31 (15.35-33.24)	0.39 (0.29-0.5)
Mongolia		1341 (1136-1597)	96.46 (82.51-112.41)	4465 (3766-5301)	145.41 (124.86-170.18)	1.62 (1.47-1.77)		88 (75-103)	5.09 (4.51-5.74)	240 (209-276)	7.43 (6.55-8.37)	1.49 (1.35-1.63)		2 (1-5)	0.2 (0.11-0.59)	7 (4-10)	0.38 (0.22-0.57)	2.74 (2.12-3.36)		229 (159-337)	17.07 (12.05-25.83)	767 (537-1030)	26.62 (18.95-35.33)	1.85 (1.64-2.05)
Montenegro		847 (717-1015)	130.32 (110.6-155.72)	1382 (1190-1617)	161.87 (138.73-191.14)	0.97 (0.8-1.13)		45 (38-52)	6.83 (5.85-7.93)	63 (55-72)	8.54 (7.35-9.78)	0.99 (0.83-1.14)		1 (1-1)	0.17 (0.12-0.22)	2 (1-2)	0.17 (0.12-0.23)	-0.06 (-0.22-0.09)		139 (101-192)	21.47 (15.74-29.55)	215 (155-291)	24.96 (17.9-34.31)	0.68 (0.57-0.8)
Morocco		11351 (9202-13757)	59.05 (48.73-70.77)	34752 (29000-41378)	89.88 (75.22-106.82)	1.4 (1.3-1.5)		675 (558-804)	2.86 (2.43-3.37)	1666 (1422-1934)	4.3 (3.68-4.99)	1.35 (1.25-1.45)		12 (6-27)	0.08 (0.04-0.18)	49 (21-101)	0.15 (0.06-0.3)	2.47 (2.12-2.82)		1953 (1282-2804)	10.3 (6.78-14.68)	6009 (3977-8650)	15.75 (10.42-22.7)	1.56 (1.49-1.64)
Mozambique		5418 (4614-6428)	71.35 (62.37-82.95)	13611 (11490-16176)	87.46 (76.89-100.33)	0.58 (0.54-0.63)		396 (348-454)	4.64 (4.15-5.2)	1035 (907-1188)	5.55 (4.97-6.18)	0.5 (0.46-0.54)		2 (1-20)	0.04 (0.01-0.39)	3 (1-31)	0.03 (0.01-0.35)	-0.64 (-0.76--0.53)		787 (516-1291)	10.33 (6.88-17.75)	1911 (1261-2934)	12.14 (8.3-18.38)	0.47 (0.43-0.51)
Myanmar		14500 (12136-17509)	49.08 (41.72-58.08)	41659 (35368-48741)	76.41 (65.57-88.76)	1.51 (1.42-1.6)		949 (821-1097)	2.84 (2.5-3.2)	2501 (2193-2843)	4.44 (3.89-5.02)	1.48 (1.4-1.56)		58 (35-79)	0.32 (0.18-0.43)	104 (59-138)	0.27 (0.15-0.37)	-0.79 (-0.94--0.65)		3485 (2629-4556)	13.1 (9.76-16.89)	7722 (5668-10479)	15 (11.14-20.02)	0.33 (0.29-0.37)
Namibia		1090 (914-1278)	128.5 (110.68-147.41)	3024 (2551-3571)	164.8 (142.66-190.32)	0.86 (0.75-0.98)		74 (64-85)	7.26 (6.46-8.1)	195 (169-223)	9.19 (8.2-10.23)	0.82 (0.7-0.93)		4 (2-6)	0.63 (0.29-0.99)	6 (2-10)	0.5 (0.14-0.86)	-1.07 (-1.33--0.81)		248 (185-330)	31.5 (23.32-41.55)	559 (409-779)	32.45 (23.5-44.46)	-0.06 (-0.16-0.04)
Nauru		4 (4-5)	61.87 (51.47-73.45)	7 (6-8)	82.61 (69.28-97.08)	0.82 (0.62-1.01)		0 (0-0)	3.2 (2.73-3.68)	0 (0-0)	4.16 (3.61-4.72)	0.73 (0.55-0.91)		0 (0-0)	0 (0-0)	0 (0-0)	0 (0-0)	0.15 (-0.28-0.58)		1 (0-1)	8.53 (5.55-12.25)	1 (1-1)	11.22 (7.56-16.21)	0.77 (0.58-0.96)
Nepal		13986 (11740-16493)	115.17 (99.29-132.95)	50455 (43061-59419)	190.65 (164.37-221.91)	1.71 (1.63-1.79)		1000 (865-1142)	7.44 (6.59-8.35)	3347 (2967-3847)	11.89 (10.61-13.49)	1.56 (1.51-1.6)		57 (34-91)	0.85 (0.52-1.37)	154 (102-245)	0.81 (0.53-1.29)	-0.11 (-0.39-0.17)		3053 (2268-4004)	30.16 (22.66-40.1)	9551 (6933-12568)	38.55 (28.51-50.14)	0.88 (0.7-1.05)
Netherlands		68987 (61348-77161)	363.48 (321.16-410.07)	110500 (99131-123187)	375.19 (329.29-425.86)	0.32 (0.16-0.48)		4323 (3888-4803)	23.96 (21.57-26.7)	6534 (5822-7411)	24.35 (21.78-27.48)	0.29 (0.12-0.45)		271 (243-292)	1.3 (1.16-1.39)	235 (198-261)	0.6 (0.51-0.67)	-2.37 (-2.99--1.76)		13830 (10857-17358)	71.44 (55.56-90.07)	17942 (13439-23415)	59.3 (43.4-79.15)	-0.34 (-0.44--0.23)
New Zealand		15496 (13658-17758)	404.09 (355.71-464.38)	29686 (26336-33805)	395.82 (347.81-452.63)	0.02 (-0.05-0.1)		955 (826-1095)	25.82 (22.36-29.62)	1721 (1493-1963)	25.05 (21.89-28.41)	0 (-0.07-0.06)		43 (38-47)	1.06 (0.95-1.17)	48 (40-55)	0.53 (0.45-0.6)	-2.25 (-2.72--1.79)		2832 (2219-3584)	73.18 (57.07-93.09)	4657 (3433-6124)	61.09 (44.25-81.29)	-0.5 (-0.62--0.38)
Nicaragua		3317 (2820-3813)	164.8 (144.83-185.79)	13564 (11856-15592)	240.95 (213.63-272.54)	1.34 (1.29-1.38)		246 (214-279)	10.4 (9.38-11.49)	876 (785-977)	14.64 (13.33-16.18)	1.2 (1.17-1.23)		9 (7-12)	0.69 (0.5-0.89)	24 (19-32)	0.56 (0.45-0.73)	-0.38 (-0.58--0.19)		680 (526-886)	35.68 (27.93-45.75)	2326 (1712-3031)	42.5 (31.84-54.48)	0.7 (0.62-0.77)
Niger		1811 (1451-2249)	42.63 (35.16-51.99)	6292 (5094-7764)	50.62 (42.26-60.87)	0.67 (0.58-0.76)		131 (109-158)	2.52 (2.14-2.93)	461 (381-554)	2.92 (2.53-3.35)	0.58 (0.5-0.67)		0 (0-0)	0.01 (0-0.02)	0 (0-1)	0.01 (0-0.01)	-1.53 (-1.66--1.4)		255 (160-373)	6.01 (3.9-8.66)	880 (551-1298)	7.01 (4.5-10.19)	0.61 (0.52-0.7)
Nigeria		27873 (22577-34478)	48.07 (39.95-58.36)	86155 (69568-105996)	61.05 (51.14-73.28)	0.86 (0.71-1.01)		1861 (1552-2253)	2.7 (2.3-3.19)	5813 (4830-6932)	3.32 (2.83-3.84)	0.74 (0.6-0.87)		3 (1-5)	0.01 (0-0.01)	3 (2-5)	0 (0-0.01)	-1.86 (-2.05--1.67)		3885 (2554-5609)	6.66 (4.48-9.56)	11903 (7759-17048)	8.33 (5.62-11.91)	0.81 (0.67-0.95)
Niue		1 (1-1)	58.34 (48.33-70.12)	2 (1-2)	80.56 (67.39-96.93)	1.05 (1.03-1.07)		0 (0-0)	2.93 (2.52-3.42)	0 (0-0)	3.99 (3.4-4.61)	0.99 (0.97-1.02)		0 (0-0)	0 (0-0)	0 (0-0)	0 (0-0)	-0.81 (-0.94--0.69)		0 (0-0)	8.04 (5.26-11.72)	0 (0-0)	10.93 (7.11-15.84)	1 (0.99-1.02)
North Macedonia		1834 (1505-2222)	89.69 (73.8-108.24)	3831 (3203-4533)	125.19 (104.91-149.86)	1.27 (1.2-1.35)		96 (79-114)	4.61 (3.82-5.45)	173 (148-201)	6.47 (5.52-7.49)	1.29 (1.21-1.37)		1 (1-2)	0.08 (0.06-0.11)	1 (1-2)	0.04 (0.03-0.06)	-2.27 (-2.44--2.1)		281 (191-401)	13.87 (9.46-19.68)	533 (362-757)	17.48 (11.77-24.73)	0.9 (0.81-0.99)
Northern Mariana Islands		28 (22-36)	72.86 (60.48-87.89)	49 (40-59)	86.02 (70.34-102.47)	0.35 (0.24-0.45)		2 (1-2)	3.67 (3.13-4.29)	2 (2-3)	4.26 (3.64-4.89)	0.29 (0.18-0.4)		0 (0-0)	0.01 (0.01-0.02)	0 (0-0)	0.01 (0.01-0.02)	0.47 (-0.75-1.7)		4 (2-6)	10.34 (6.66-15.14)	7 (5-10)	11.99 (8.01-17.08)	0.34 (0.21-0.47)
Norway		26244 (22900-30134)	431.24 (376.13-496.72)	32761 (28992-37570)	381.88 (336.34-438.5)	-0.32 (-0.42--0.21)		1454 (1240-1710)	27.81 (23.8-32.23)	1856 (1593-2143)	24.25 (21.13-27.68)	-0.34 (-0.43--0.25)		108 (97-114)	1.43 (1.3-1.52)	54 (45-60)	0.47 (0.4-0.52)	-4.05 (-4.47--3.64)		5261 (4232-6645)	83.11 (65.66-106.09)	5067 (3769-6768)	57.83 (42.15-77.82)	-1.22 (-1.3--1.14)
Oman		638 (518-785)	48.57 (40.26-58.38)	3844 (3095-4705)	87.16 (72.44-104.46)	2.03 (1.99-2.07)		42 (34-50)	2.41 (2.05-2.83)	214 (172-257)	4.31 (3.66-5.04)	1.91 (1.87-1.95)		0 (0-0)	0.04 (0.03-0.07)	1 (1-1)	0.04 (0.03-0.07)	1.12 (0.74-1.5)		97 (64-144)	7.64 (5.2-11.01)	548 (355-804)	12.67 (8.61-18.09)	1.87 (1.81-1.92)
Pakistan		134628 (113051-158450)	183.74 (158.89-214.48)	318963 (266005-379802)	175.29 (149.74-204.67)	0.18 (0.04-0.31)		8606 (7396-10011)	9.81 (8.62-11.12)	19454 (16729-22566)	9.36 (8.29-10.6)	0.15 (0.01-0.28)		478 (294-703)	1.01 (0.62-1.54)	1006 (624-1401)	1.13 (0.7-1.61)	0.11 (-0.12-0.34)		27314 (20080-35286)	42.21 (31.65-53.67)	62774 (46290-83502)	42.69 (30.85-55.08)	0.1 (0.04-0.16)
Palau		9 (7-10)	66.5 (55.37-79.05)	21 (17-25)	87.48 (72.77-103.36)	0.81 (0.77-0.86)		1 (0-1)	3.36 (2.88-3.87)	1 (1-1)	4.32 (3.69-4.96)	0.73 (0.7-0.77)		0 (0-0)	0 (0-0.01)	0 (0-0)	0 (0-0)	-1.27 (-1.37--1.17)		1 (1-2)	9.23 (5.95-13.49)	3 (2-4)	11.82 (7.75-17.25)	0.73 (0.69-0.77)
Palestine		917 (741-1112)	75.61 (62.41-90.2)	4138 (3406-4983)	105.55 (89.41-124.71)	1.05 (0.96-1.14)		58 (48-70)	3.58 (3.02-4.18)	248 (208-295)	5.14 (4.41-5.94)	1.17 (1.08-1.25)		1 (1-1)	0.1 (0.06-0.14)	1 (1-2)	0.06 (0.04-0.08)	-1.49 (-1.57--1.4)		150 (104-213)	12.63 (9.02-17.53)	597 (398-831)	15.42 (10.5-21.15)	0.64 (0.54-0.74)
Panama		2402 (2047-2823)	136.5 (118.09-157.38)	8326 (7257-9541)	188.7 (164.34-216.42)	1.03 (1-1.06)		157 (137-181)	7.87 (7-8.86)	463 (413-520)	10.54 (9.41-11.83)	0.93 (0.9-0.95)		6 (5-7)	0.45 (0.39-0.49)	19 (15-23)	0.42 (0.32-0.51)	-0.42 (-0.59--0.24)		457 (345-602)	27.06 (20.97-35.04)	1462 (1088-1942)	33.03 (24.55-43.93)	0.57 (0.51-0.63)
Papua New Guinea		1114 (890-1392)	39.11 (32.02-47.83)	3768 (3044-4552)	46.34 (38.71-54.9)	0.47 (0.41-0.54)		71 (58-87)	2.03 (1.7-2.4)	227 (189-268)	2.39 (2.04-2.77)	0.46 (0.4-0.53)		0 (0-0)	0 (0-0)	0 (0-0)	0 (0-0)	-0.56 (-0.64--0.49)		159 (100-240)	5.54 (3.56-8.25)	533 (343-814)	6.49 (4.19-9.69)	0.44 (0.38-0.5)
Paraguay		5123 (4259-6092)	181.53 (154.08-212.82)	20838 (17900-24085)	310.17 (270.34-354.51)	1.51 (1.39-1.64)		306 (261-360)	8.9 (7.78-10.15)	1114 (986-1271)	15.15 (13.56-17.05)	1.48 (1.34-1.61)		8 (6-11)	0.35 (0.27-0.46)	36 (24-47)	0.62 (0.43-0.81)	2.51 (2.22-2.8)		926 (676-1267)	33.05 (24.45-44.81)	3710 (2758-4929)	56.3 (42.43-74.35)	1.74 (1.6-1.87)
Peru		50300 (43076-57143)	310.13 (271.04-349.21)	191230 (167767-216000)	520.62 (457.53-587.32)	1.9 (1.79-2.01)		2971 (2572-3358)	14.82 (13.15-16.56)	9210 (8112-10311)	24.36 (21.56-27.12)	1.82 (1.72-1.92)		81 (58-103)	0.77 (0.55-0.98)	147 (110-193)	0.43 (0.33-0.58)	-2.7 (-3.17--2.23)		8254 (5950-11011)	53.62 (39.82-69.54)	28275 (19663-38124)	77.39 (54.14-103.87)	1.25 (1.15-1.36)
Philippines		40824 (34304-49169)	99.37 (84.8-117.56)	87788 (74088-105647)	89.54 (76.91-106.05)	-0.11 (-0.19--0.04)		2750 (2354-3221)	5.78 (5.05-6.67)	5448 (4765-6291)	5.33 (4.71-6.11)	-0.11 (-0.16--0.06)		89 (54-106)	0.46 (0.26-0.54)	207 (142-252)	0.33 (0.23-0.4)	-0.9 (-1.08--0.71)		7697 (5771-10213)	20.81 (15.93-26.87)	16171 (12139-21222)	17.74 (13.69-22.75)	-0.38 (-0.45--0.32)
Poland		117809 (102287-134773)	274.6 (237.32-314.54)	147074 (128945-166540)	255.76 (222.53-293.28)	-0.11 (-0.21--0.02)		5783 (5061-6623)	14.18 (12.4-16.14)	6209 (5455-7031)	13.36 (11.77-15.08)	-0.07 (-0.16-0.02)		487 (465-504)	1.1 (1.05-1.14)	270 (241-294)	0.37 (0.33-0.4)	-3.84 (-4.26--3.42)		27615 (22721-33744)	63.81 (52.33-78.38)	24813 (18740-32427)	41.88 (30.93-56.18)	-1.34 (-1.5--1.19)
Portugal		23322 (20381-26400)	186.19 (162.29-212.42)	47395 (42275-52931)	272.16 (237.24-310.07)	1.27 (1.14-1.39)		1232 (1117-1355)	10.52 (9.41-11.62)	2182 (1950-2411)	15.03 (13.35-16.58)	1.2 (1.08-1.31)		73 (67-80)	0.54 (0.49-0.58)	92 (76-103)	0.32 (0.27-0.36)	-1.62 (-2.07--1.17)		4578 (3571-5792)	35.66 (27.53-45.72)	7633 (5617-9952)	41.79 (29.77-55.71)	0.63 (0.57-0.68)
Puerto Rico		4972 (4245-5759)	138.04 (117.87-160.31)	11213 (9833-12764)	217.31 (185.64-256.22)	1.53 (1.45-1.62)		287 (254-323)	7.8 (6.94-8.81)	517 (461-591)	11.72 (10.32-13.39)	1.38 (1.31-1.46)		20 (18-22)	0.66 (0.59-0.72)	31 (25-36)	0.34 (0.28-0.41)	-1.91 (-2.11--1.71)		964 (732-1270)	27.67 (21.23-36.17)	1910 (1424-2518)	35.07 (25.33-47.63)	0.76 (0.67-0.85)
Qatar		251 (198-312)	67.83 (55.82-81.69)	3646 (2832-4530)	119.89 (98.42-144.84)	1.6 (1.43-1.77)		16 (12-19)	3.5 (2.94-4.09)	204 (159-248)	6.01 (5.03-7.02)	1.47 (1.3-1.63)		0 (0-0)	0.05 (0.03-0.07)	0 (0-0)	0.04 (0.02-0.06)	-0.69 (-1.31--0.06)		36 (23-54)	10.25 (6.93-14.31)	508 (321-764)	16.64 (11.04-24.06)	1.38 (1.23-1.52)
Republic of Korea		63676 (55903-71309)	167.54 (148.74-185.96)	200621 (179911-223929)	237.67 (211.31-264.37)	1.29 (1.14-1.43)		4135 (3688-4581)	9.77 (8.82-10.71)	10942 (9831-12139)	14.35 (12.97-15.86)	1.43 (1.26-1.6)		178 (139-230)	0.83 (0.62-1.06)	200 (146-278)	0.21 (0.16-0.29)	-4.9 (-5.16--4.65)		12756 (9836-16506)	37.53 (29.66-47.67)	30097 (21481-40114)	35.49 (25.2-47.56)	-0.12 (-0.16--0.08)
Republic of Moldova		4000 (3327-4735)	86.86 (72.2-102.86)	6432 (5530-7525)	124.72 (106.05-147.47)	1.23 (1.06-1.4)		196 (166-226)	4.28 (3.63-4.94)	263 (229-306)	6.08 (5.26-7.06)	1.18 (1.02-1.35)		6 (6-7)	0.14 (0.12-0.16)	12 (10-14)	0.2 (0.17-0.23)	-0.12 (-0.69-0.47)		722 (531-983)	15.65 (11.52-21.4)	1172 (879-1567)	22.25 (16.48-30.07)	0.82 (0.59-1.05)
Romania		23418 (19239-28493)	87.27 (71.17-106.43)	36841 (31181-43262)	130.57 (109.23-154.42)	1.44 (1.37-1.52)		1128 (945-1321)	4.48 (3.71-5.29)	1524 (1296-1769)	6.73 (5.71-7.83)	1.45 (1.38-1.52)		1 (1-1)	0 (0-0)	1 (1-1)	0 (0-0)	-1.25 (-1.43--1.07)		3149 (2066-4614)	11.79 (7.7-17.2)	4896 (3331-7143)	17.58 (11.71-25.91)	1.43 (1.36-1.51)
Russian Federation		298407 (257614-340037)	170.52 (146.59-195.06)	399005 (347815-451710)	199.97 (173.02-228.36)	0.58 (0.54-0.62)		12860 (11158-14508)	7.89 (6.83-8.93)	14831 (13023-16750)	9.32 (8.18-10.52)	0.59 (0.56-0.62)		772 (749-789)	0.42 (0.41-0.43)	1083 (983-1181)	0.46 (0.41-0.5)	-0.46 (-1.08-0.16)		61736 (48913-78215)	34.89 (27.51-44.27)	78330 (61649-99757)	37.9 (29.26-48.89)	0.11 (-0.01-0.23)
Rwanda		2912 (2483-3443)	78.8 (68.81-90.43)	8616 (7341-10090)	103.63 (90.82-118.42)	1.13 (1-1.27)		216 (188-248)	5.03 (4.53-5.59)	622 (550-707)	6.46 (5.77-7.17)	1.03 (0.91-1.14)		1 (0-12)	0.05 (0.02-0.5)	1 (0-14)	0.03 (0.01-0.29)	-3.13 (-3.45--2.81)		432 (283-767)	11.67 (7.73-21.88)	1195 (790-1715)	14.25 (9.75-20.4)	0.8 (0.68-0.92)
Saint Kitts and Nevis		42 (36-48)	121.19 (104.38-139.47)	125 (109-144)	174.32 (152.26-198.82)	1.17 (1.03-1.3)		3 (2-3)	7.28 (6.54-8.06)	7 (6-7)	10.16 (9.18-11.27)	1.09 (0.96-1.22)		0 (0-0)	0.88 (0.68-1.04)	0 (0-0)	0.88 (0.68-1.03)	0.02 (-0.33-0.37)		11 (8-13)	31.44 (25.21-38.4)	25 (19-32)	36.79 (28.64-46.63)	0.49 (0.33-0.66)
Saint Lucia		107 (92-125)	112.37 (98.12-128.96)	352 (304-401)	153.77 (133.06-175.78)	0.97 (0.82-1.11)		8 (7-9)	7.15 (6.43-7.9)	20 (18-22)	9.46 (8.53-10.37)	0.86 (0.74-0.99)		1 (0-1)	0.8 (0.71-0.88)	1 (1-2)	0.66 (0.54-0.78)	-1.74 (-2.19--1.29)		24 (19-30)	27.13 (21.86-33.27)	70 (54-89)	30.56 (23.61-39.23)	0.06 (-0.07-0.18)
Saint Vincent and the Grenadines		59 (49-71)	75.18 (63.02-89.17)	130 (109-153)	97.39 (82.36-114.92)	0.9 (0.86-0.94)		4 (3-5)	4.37 (3.81-5)	7 (6-8)	5.56 (4.87-6.37)	0.82 (0.79-0.85)		0 (0-0)	0.34 (0.3-0.37)	0 (0-0)	0.23 (0.19-0.27)	-0.88 (-1.5--0.25)		12 (9-15)	15.63 (12.12-19.98)	22 (16-30)	16.69 (12.03-22.62)	0.35 (0.16-0.55)
Samoa		70 (57-85)	61.47 (51.17-74.09)	133 (111-159)	77.02 (64.83-91.29)	0.64 (0.58-0.69)		4 (4-5)	3.07 (2.64-3.6)	7 (6-9)	3.87 (3.33-4.42)	0.65 (0.6-0.7)		0 (0-0)	0 (0-0)	0 (0-0)	0 (0-0)	-0.86 (-0.93--0.78)		10 (6-14)	8.48 (5.47-12.17)	18 (12-26)	10.5 (6.8-15.16)	0.6 (0.56-0.65)
San Marino		44 (37-52)	147.99 (122.79-178.32)	79 (67-93)	162.39 (136.57-192.21)	0.42 (0.34-0.51)		2 (2-3)	7.89 (6.77-9.25)	3 (3-4)	8.39 (7.11-9.72)	0.31 (0.21-0.41)		0 (0-0)	0.17 (0.13-0.23)	0 (0-0)	0.07 (0.05-0.11)	-1.89 (-2.21--1.57)		7 (5-10)	23.06 (16.1-32.29)	12 (8-16)	23.19 (15.87-32.59)	0.19 (0.09-0.29)
Sao Tome and Principe		42 (34-50)	55.95 (46.44-66.9)	115 (93-139)	73.76 (62.02-87.49)	0.96 (0.84-1.08)		3 (2-3)	3.19 (2.73-3.68)	8 (6-9)	4.16 (3.58-4.75)	0.91 (0.8-1.02)		0 (0-0)	0.01 (0-0.01)	0 (0-0)	0 (0-0.01)	-1.77 (-1.92--1.62)		6 (4-8)	7.73 (5.1-11.46)	16 (10-24)	10.03 (6.64-14.96)	0.9 (0.78-1.01)
Saudi Arabia		5984 (4867-7360)	54.5 (45.93-65.99)	39450 (31774-47913)	95.93 (79.9-114.11)	1.94 (1.82-2.07)		398 (327-478)	2.74 (2.33-3.23)	2035 (1662-2429)	4.68 (3.95-5.47)	1.85 (1.73-1.97)		3 (2-5)	0.06 (0.03-0.1)	13 (8-22)	0.07 (0.05-0.1)	0.68 (0.38-0.98)		936 (630-1323)	8.85 (6.21-12.12)	5807 (3884-8325)	14.55 (10.07-20.55)	1.72 (1.65-1.8)
Senegal		2238 (1807-2766)	51.74 (42.81-62.06)	6751 (5435-8226)	64.81 (53.86-77.51)	0.7 (0.62-0.78)		157 (132-187)	3.04 (2.6-3.5)	455 (382-541)	3.73 (3.2-4.28)	0.63 (0.56-0.7)		0 (0-0)	0.01 (0-0.02)	0 (0-1)	0.01 (0-0.01)	-1.69 (-1.82--1.56)		312 (198-459)	7.18 (4.65-10.43)	925 (595-1351)	8.78 (5.84-12.53)	0.62 (0.55-0.7)
Serbia		12749 (11684-13838)	109.89 (100.39-119.36)	22630 (19867-25517)	167.33 (143.69-191.04)	1.39 (1.24-1.54)		680 (616-752)	6.03 (5.48-6.64)	1005 (888-1136)	8.98 (7.93-10.22)	1.35 (1.23-1.47)		33 (24-44)	0.34 (0.25-0.45)	34 (25-48)	0.2 (0.15-0.28)	-1.97 (-2.11--1.83)		2447 (1853-3122)	21.6 (16.54-27.49)	3632 (2662-4885)	26.2 (18.72-36.05)	0.56 (0.41-0.71)
Seychelles		29 (24-36)	47.88 (39.13-58.33)	80 (66-95)	64.64 (53.49-77.14)	0.94 (0.9-0.98)		2 (1-2)	2.55 (2.16-3)	4 (3-5)	3.39 (2.9-3.94)	0.9 (0.85-0.94)		0 (0-0)	0.04 (0.03-0.05)	0 (0-0)	0.03 (0.02-0.04)	-0.44 (-0.64--0.25)		5 (3-6)	7.44 (5.07-10.82)	11 (8-16)	9.37 (6.28-13.39)	0.75 (0.71-0.79)
Sierra Leone		1267 (1025-1550)	48.01 (40.08-57.82)	3170 (2552-3903)	56.72 (47.49-68.42)	0.54 (0.42-0.66)		86 (72-103)	2.83 (2.41-3.28)	221 (184-266)	3.28 (2.85-3.77)	0.47 (0.35-0.58)		0 (0-0)	0.01 (0-0.01)	0 (0-0)	0 (0-0.01)	-1.71 (-1.93--1.48)		177 (112-265)	6.66 (4.3-9.85)	440 (279-642)	7.75 (5.01-11.21)	0.49 (0.37-0.61)
Singapore		3213 (2686-3839)	110.91 (94-130.45)	12176 (10406-14374)	148.08 (126.09-176.04)	1.03 (0.97-1.1)		196 (167-229)	6.18 (5.36-7.09)	614 (523-714)	8.25 (7.1-9.53)	1.06 (0.99-1.12)		3 (3-4)	0.17 (0.15-0.19)	4 (3-4)	0.05 (0.04-0.05)	-4.79 (-5.29--4.29)		510 (354-708)	18.33 (13.33-24.97)	1714 (1159-2408)	20.9 (13.94-29.74)	0.49 (0.45-0.53)
Slovakia		5730 (4856-6794)	99.56 (84.26-118.23)	10923 (9357-12523)	138.11 (117.07-159.53)	1.1 (1.05-1.15)		281 (241-324)	5.05 (4.32-5.84)	465 (406-531)	7.07 (6.13-8.05)	1.13 (1.08-1.18)		15 (11-18)	0.25 (0.19-0.3)	14 (10-19)	0.14 (0.11-0.2)	-1.88 (-2--1.76)		1112 (839-1453)	19.13 (14.42-25.08)	1730 (1247-2341)	21.47 (15.26-29.39)	0.39 (0.3-0.48)
Slovenia		5357 (4660-6044)	222.91 (193.87-252.81)	11292 (10018-12654)	314.57 (274.16-360.56)	1.31 (1.23-1.38)		277 (249-309)	12.01 (10.72-13.44)	495 (441-545)	17.37 (15.4-19.44)	1.4 (1.31-1.49)		20 (18-22)	0.8 (0.72-0.88)	17 (14-20)	0.35 (0.28-0.41)	-3.08 (-3.48--2.67)		1147 (909-1446)	47.5 (37.58-59.91)	1755 (1295-2354)	47.88 (34.02-65.39)	0 (-0.17-0.17)
Solomon Islands		105 (85-127)	49.78 (41.55-58.76)	351 (289-418)	67.35 (56.72-79.52)	0.88 (0.83-0.93)		7 (6-8)	2.59 (2.24-2.98)	21 (18-25)	3.41 (2.96-3.89)	0.79 (0.75-0.84)		0 (0-0)	0 (0-0)	0 (0-0)	0 (0-0)	0.17 (0.08-0.25)		15 (9-22)	6.95 (4.48-10.22)	49 (31-72)	9.25 (5.99-13.4)	0.84 (0.79-0.89)
Somalia		2919 (2436-3475)	78.49 (68.57-89.91)	7796 (6534-9327)	80.63 (71.18-92.04)	0.11 (0.08-0.13)		231 (200-266)	5.02 (4.51-5.57)	624 (541-720)	5.14 (4.64-5.66)	0.08 (0.05-0.11)		1 (0-9)	0.07 (0.02-0.48)	2 (1-19)	0.04 (0.01-0.4)	-1.41 (-1.5--1.33)		435 (280-714)	11.82 (7.85-20.53)	1122 (725-1758)	11.6 (7.75-19.55)	-0.06 (-0.08--0.04)
South Africa		94283 (81987-107683)	346.02 (303.11-391.8)	169310 (147974-192818)	300.25 (263.26-339.97)	-0.3 (-0.38--0.22)		5847 (5087-6617)	17.17 (15.2-19.27)	9168 (8067-10269)	15.26 (13.52-17.11)	-0.23 (-0.32--0.14)		219 (165-263)	1.06 (0.78-1.29)	320 (268-404)	0.76 (0.64-0.96)	-1.69 (-2.18--1.21)		19460 (15183-24835)	73.23 (57.43-92.32)	30573 (23107-39530)	56.39 (43.09-71.67)	-1 (-1.14--0.85)
South Sudan		2199 (1844-2632)	68.42 (59.15-80.33)	4435 (3705-5274)	80.76 (69.84-93.02)	0.6 (0.54-0.65)		162 (139-188)	4.34 (3.84-4.89)	322 (277-373)	5 (4.45-5.61)	0.52 (0.47-0.57)		1 (0-7)	0.04 (0.01-0.3)	1 (0-9)	0.03 (0.01-0.25)	-1.35 (-1.53--1.16)		318 (210-497)	9.84 (6.55-15.76)	621 (402-901)	11.18 (7.4-16.5)	0.47 (0.41-0.53)
Spain		94565 (87874-101407)	193.32 (178.57-206.75)	178523 (167971-189366)	233.58 (218.66-247.56)	0.55 (0.49-0.61)		5347 (4937-5790)	11.67 (10.8-12.56)	9381 (8795-10037)	14.01 (13.16-14.91)	0.52 (0.45-0.58)		240 (212-269)	0.43 (0.38-0.48)	266 (217-306)	0.23 (0.19-0.26)	-2.06 (-2.26--1.86)		17244 (13371-21736)	34.38 (26.26-44.05)	27326 (19900-36266)	34.91 (25.29-46.97)	0.01 (-0.03-0.04)
Sri Lanka		5719 (4618-7145)	40.46 (33.13-49.59)	14501 (11987-17414)	55.81 (46.35-67.11)	1.14 (1.02-1.25)		350 (292-423)	2.23 (1.89-2.64)	748 (642-881)	3.04 (2.59-3.54)	1.1 (0.98-1.23)		4 (3-5)	0.04 (0.03-0.06)	8 (5-11)	0.03 (0.02-0.05)	0.07 (-0.35-0.49)		893 (590-1283)	6.45 (4.35-9.14)	2121 (1391-3031)	8.2 (5.34-11.66)	0.91 (0.83-1)
Sudan		6711 (5487-8151)	49.73 (41.39-59.45)	25075 (20558-30006)	76.68 (64.36-90.36)	1.5 (1.35-1.66)		425 (351-506)	2.47 (2.08-2.88)	1539 (1283-1820)	3.73 (3.19-4.32)	1.43 (1.3-1.57)		8 (4-15)	0.09 (0.04-0.16)	23 (14-39)	0.11 (0.07-0.18)	1.24 (1.02-1.46)		1205 (815-1664)	9.14 (6.22-12.68)	4205 (2876-5839)	13.3 (9.29-18.11)	1.41 (1.31-1.51)
Suriname		204 (168-245)	66.33 (55.24-78.83)	539 (451-640)	85.31 (71.49-101.68)	0.92 (0.83-1)		13 (11-15)	3.84 (3.33-4.41)	29 (25-33)	4.78 (4.15-5.51)	0.81 (0.73-0.88)		0 (0-1)	0.17 (0.12-0.23)	1 (0-1)	0.13 (0.09-0.19)	-0.8 (-0.98--0.62)		36 (26-49)	12.04 (8.88-16.25)	86 (61-118)	13.66 (9.81-18.86)	0.48 (0.4-0.56)
Sweden		46872 (41730-52769)	364.45 (324.11-410.87)	56098 (50418-63196)	326.56 (290.46-371.83)	-0.34 (-0.36--0.31)		2716 (2388-3098)	23.21 (20.48-26.29)	3213 (2787-3649)	20.8 (18.45-23.46)	-0.32 (-0.34--0.3)		144 (128-155)	0.86 (0.77-0.93)	114 (95-131)	0.43 (0.36-0.5)	-2.39 (-2.7--2.07)		8604 (6673-10956)	64.22 (48.8-81.78)	8894 (6544-11575)	49.86 (35.57-66.81)	-0.88 (-0.93--0.82)
Switzerland		25695 (22662-29186)	272.62 (237.06-312.76)	44276 (39180-50073)	299.45 (259.51-345.15)	0.38 (0.32-0.44)		1542 (1375-1730)	17.49 (15.6-19.53)	2528 (2244-2832)	18.98 (16.84-21.32)	0.34 (0.26-0.41)		72 (63-82)	0.63 (0.55-0.71)	60 (47-70)	0.28 (0.22-0.32)	-2.71 (-2.96--2.46)		4569 (3464-5929)	47.18 (35.29-62.29)	6600 (4792-8771)	43.85 (30.92-59.39)	-0.18 (-0.22--0.15)
Syrian Arab Republic		5251 (4251-6440)	66.12 (54.78-79.78)	15167 (12569-18372)	105.67 (88.19-128.71)	1.61 (1.49-1.73)		344 (285-415)	3.22 (2.71-3.79)	740 (621-875)	5.21 (4.41-6.17)	1.66 (1.52-1.8)		4 (3-6)	0.07 (0.05-0.1)	11 (7-14)	0.1 (0.06-0.13)	1.38 (1.14-1.63)		872 (614-1194)	10.92 (7.69-14.84)	2342 (1639-3198)	16.4 (11.67-22.66)	1.45 (1.33-1.57)
Taiwan (Province of China)		29217 (25189-33737)	161.46 (139.57-184.52)	64776 (63482-66255)	167 (163.67-170.52)	0.61 (0.42-0.79)		1948 (1717-2182)	10.02 (8.89-11.17)	3740 (3503-3981)	10.47 (9.94-11.03)	0.55 (0.38-0.73)		84 (78-88)	0.63 (0.58-0.67)	155 (132-179)	0.36 (0.31-0.41)	-0.35 (-0.92-0.22)		5955 (4556-7751)	34.39 (26.78-43.93)	11327 (8649-14562)	28.91 (21.92-37.36)	0.23 (-0.04-0.51)
Tajikistan		3994 (3394-4652)	115.71 (99.68-132.56)	12028 (10251-14268)	149.27 (130.09-173.13)	0.71 (0.66-0.77)		254 (218-297)	6.07 (5.33-6.84)	708 (619-809)	7.96 (7.14-8.93)	0.78 (0.73-0.84)		1 (0-2)	0.03 (0.02-0.07)	5 (2-8)	0.11 (0.04-0.17)	4.33 (3.56-5.11)		561 (374-795)	16.16 (10.85-22.68)	1763 (1211-2493)	22.13 (15.35-30.86)	0.95 (0.91-0.99)
Thailand		30835 (25944-36574)	67.18 (57.63-78.14)	98809 (84065-114126)	100.26 (85.37-116.76)	1.38 (1.31-1.45)		1975 (1687-2267)	3.8 (3.3-4.34)	4858 (4188-5575)	5.54 (4.79-6.32)	1.31 (1.25-1.37)		91 (64-130)	0.29 (0.2-0.43)	220 (157-318)	0.2 (0.14-0.29)	-1.51 (-1.67--1.35)		6639 (4908-8903)	15.47 (11.65-20.27)	17599 (12920-23550)	17.64 (12.94-24.04)	0.39 (0.35-0.42)
Timor-Leste		211 (170-259)	45.26 (38.11-53.77)	644 (544-766)	64.69 (55.5-76.56)	1.21 (1.17-1.25)		15 (13-18)	2.67 (2.34-3.07)	43 (37-49)	3.9 (3.46-4.45)	1.24 (1.22-1.27)		0 (0-1)	0.25 (0.15-0.36)	2 (1-3)	0.26 (0.13-0.38)	0.25 (0.15-0.36)		42 (31-57)	10.85 (8.04-14.49)	125 (92-169)	13.28 (9.77-17.78)	0.74 (0.68-0.8)
Togo		956 (763-1188)	50.41 (41.92-60.29)	3529 (2862-4270)	62.85 (52.9-74.83)	0.74 (0.61-0.87)		70 (58-84)	2.96 (2.55-3.43)	236 (198-277)	3.59 (3.09-4.13)	0.64 (0.52-0.77)		0 (0-0)	0.01 (0-0.01)	0 (0-0)	0.01 (0-0.01)	-1.34 (-1.56--1.12)		133 (83-201)	6.95 (4.51-10.13)	486 (307-712)	8.54 (5.46-12.37)	0.7 (0.57-0.82)
Tokelau		1 (1-1)	50.78 (42.29-60.95)	1 (1-1)	72.22 (60.59-86.3)	1.15 (1.12-1.19)		0 (0-0)	2.6 (2.24-3.01)	0 (0-0)	3.61 (3.11-4.15)	1.05 (1.01-1.09)		0 (0-0)	0 (0-0)	0 (0-0)	0 (0-0)	-1.39 (-1.55--1.23)		0 (0-0)	7.09 (4.58-10.35)	0 (0-0)	9.83 (6.38-14.21)	1.1 (1.05-1.14)
Tonga		40 (33-48)	57.53 (47.55-68.95)	66 (53-80)	74.6 (60.69-89.81)	0.72 (0.67-0.77)		2 (2-3)	2.89 (2.47-3.37)	4 (3-4)	3.69 (3.15-4.28)	0.68 (0.64-0.73)		0 (0-0)	0 (0-0)	0 (0-0)	0 (0-0)	-0.97 (-1.14--0.79)		6 (4-8)	7.96 (5.12-11.56)	9 (6-13)	10.19 (6.51-15.1)	0.68 (0.63-0.73)
Trinidad and Tobago		1466 (1246-1693)	155.13 (134.73-177.15)	3739 (3321-4235)	209.21 (184.23-238.55)	1.13 (1.06-1.2)		97 (86-109)	9.36 (8.44-10.38)	201 (184-221)	12.17 (11.1-13.4)	1 (0.93-1.07)		7 (6-8)	1.22 (1.07-1.35)	14 (11-17)	0.76 (0.59-0.96)	-1.64 (-1.92--1.36)		355 (290-441)	41.45 (34.88-50.24)	757 (586-962)	42.18 (32.6-53.98)	0.03 (-0.07-0.12)
Tunisia		4261 (3492-5150)	65.12 (53.95-77.8)	13391 (11173-15840)	98.99 (82.28-117.36)	1.48 (1.37-1.59)		247 (206-293)	3.14 (2.64-3.69)	588 (503-684)	4.7 (4-5.47)	1.43 (1.32-1.54)		2 (1-3)	0.04 (0.03-0.06)	8 (4-13)	0.07 (0.03-0.1)	1.81 (1.52-2.11)		648 (440-906)	9.96 (6.81-13.62)	1996 (1327-2796)	14.81 (9.9-20.77)	1.46 (1.38-1.54)
Turkmenistan		61642 (54139-70346)	137.9 (122.04-155.73)	213717 (190547-237058)	221.59 (197.69-245.76)	1.69 (1.63-1.75)		3572 (3172-4045)	6.77 (6.06-7.61)	10101 (9023-11251)	10.88 (9.76-12.08)	1.72 (1.65-1.78)		173 (123-226)	0.52 (0.36-0.69)	245 (180-320)	0.28 (0.2-0.36)	-1.89 (-2.19--1.58)		13532 (10467-17343)	31.4 (24.55-40.51)	33976 (24801-45353)	35.46 (25.94-47.08)	0.53 (0.4-0.66)
Tuvalu		1677 (1377-2037)	65.37 (54.03-78.34)	4350 (3656-5219)	88.07 (74.38-104.84)	1.13 (0.99-1.28)		104 (85-124)	3.26 (2.72-3.84)	224 (193-262)	4.31 (3.71-5)	1.06 (0.91-1.21)		0 (0-0)	0 (0-0)	3 (2-4)	0.09 (0.06-0.12)	10.17 (8.43-11.93)		232 (147-343)	8.96 (5.73-13.37)	664 (453-936)	13.68 (9.44-19.03)	1.55 (1.33-1.76)
Türkiye		4 (3-5)	49.11 (40.56-59.03)	8 (7-9)	67.22 (56.75-79.67)	0.94 (0.9-0.97)		0 (0-0)	2.53 (2.16-2.91)	0 (0-0)	3.38 (2.92-3.87)	0.85 (0.82-0.88)		0 (0-0)	0 (0-0.01)	0 (0-0)	0 (0-0)	-1.34 (-1.39--1.29)		1 (0-1)	6.88 (4.46-10.36)	1 (1-2)	9.19 (5.96-13.59)	0.89 (0.87-0.92)
Uganda		6023 (5048-7223)	72.42 (63-84.24)	19133 (16115-22751)	91.94 (80.19-105.21)	0.86 (0.76-0.97)		455 (391-528)	4.66 (4.14-5.29)	1465 (1265-1689)	5.77 (5.16-6.52)	0.78 (0.68-0.88)		2 (1-14)	0.03 (0.01-0.26)	3 (1-32)	0.02 (0.01-0.26)	-1.45 (-1.7--1.19)		861 (563-1269)	10.3 (6.81-15.12)	2670 (1730-3906)	12.65 (8.37-18.35)	0.72 (0.63-0.8)
Ukraine		48012 (39607-57960)	74.7 (61.89-91.31)	59330 (49852-69373)	94.67 (78.57-111.85)	0.73 (0.7-0.76)		2073 (1736-2451)	3.63 (3.03-4.29)	2321 (1998-2711)	4.6 (3.93-5.31)	0.72 (0.69-0.75)		127 (89-151)	0.18 (0.13-0.21)	132 (93-181)	0.18 (0.13-0.25)	-0.38 (-0.7--0.06)		10320 (7841-13223)	15.82 (12.06-20.51)	11794 (8823-15246)	18.62 (13.87-24.29)	0.31 (0.19-0.44)
United Arab Emirates		976 (764-1207)	67.39 (56.51-80.29)	12159 (9840-14800)	100.45 (84.26-118.43)	1.37 (1.17-1.56)		65 (53-78)	3.45 (2.93-4)	595 (475-742)	5.63 (4.8-6.6)	1.54 (1.26-1.82)		1 (1-1)	0.18 (0.12-0.27)	4 (3-5)	0.15 (0.1-0.21)	1.2 (0.64-1.76)		172 (122-242)	13.72 (10.23-18.5)	1785 (1167-2557)	16.49 (11.58-22.62)	1 (0.85-1.15)
United Kingdom		321453 (289172-362145)	413.61 (368.87-469.34)	468285 (423198-523024)	450.37 (401.4-508.53)	0.28 (0.25-0.32)		18074 (16019-20333)	25.25 (22.57-28.19)	25538 (22734-28825)	27.37 (24.58-30.42)	0.27 (0.24-0.3)		1537 (1432-1591)	1.6 (1.49-1.65)	993 (876-1062)	0.67 (0.6-0.72)	-2 (-2.51--1.49)		70082 (56886-85451)	85.22 (68.25-105.19)	76554 (57875-98815)	70.99 (52.41-93.21)	-0.34 (-0.5--0.18)
United Republic of Tanzania		10492 (9028-12478)	77.07 (67.08-89.1)	32180 (27113-38207)	95.5 (82.7-110.2)	0.65 (0.59-0.71)		774 (676-893)	4.94 (4.39-5.57)	2354 (2048-2703)	5.99 (5.35-6.74)	0.58 (0.53-0.62)		4 (1-32)	0.04 (0.01-0.35)	5 (1-55)	0.02 (0.01-0.25)	-1.93 (-2.04--1.83)		1508 (1009-2326)	11.01 (7.47-17.5)	4470 (2972-6501)	13.11 (8.81-18.98)	0.52 (0.46-0.57)
United States of America		751904 (689984-817800)	254.34 (233.85-278.68)	1459692 (1346055-1594921)	296.68 (273.89-323.93)	0.77 (0.68-0.86)		43582 (39473-48167)	15.52 (14.08-17.13)	81505 (73805-90798)	18.27 (16.75-20.05)	0.73 (0.66-0.81)		1703 (1558-1782)	0.51 (0.47-0.53)	2260 (1961-2480)	0.37 (0.32-0.4)	-1.19 (-1.71--0.66)		131751 (100652-167293)	43.88 (33.22-56.06)	226826 (170238-291788)	45.35 (33.5-59.07)	0.28 (0.14-0.42)
United States Virgin Islands		98 (80-118)	99.43 (82.98-117.16)	173 (149-199)	130.97 (111.48-153.05)	0.89 (0.85-0.93)		6 (5-7)	5.84 (5.09-6.63)	9 (8-10)	7.45 (6.55-8.49)	0.77 (0.74-0.81)		0 (0-0)	0.29 (0.21-0.39)	0 (0-0)	0.16 (0.11-0.22)	-1.76 (-1.96--1.56)		17 (12-23)	18.01 (13.29-24.23)	26 (18-36)	19.82 (13.74-28.28)	0.34 (0.31-0.37)
Uruguay		5462 (4806-6213)	154.73 (134.43-177.87)	10001 (8825-11285)	219.03 (188.98-251.32)	1.13 (1.08-1.17)		328 (297-366)	9.46 (8.49-10.53)	542 (490-604)	12.75 (11.43-14.2)	0.97 (0.92-1.01)		24 (22-26)	0.63 (0.58-0.7)	44 (39-49)	0.72 (0.65-0.8)	0.67 (0.38-0.95)		1232 (985-1531)	34.41 (27.3-43.07)	2107 (1689-2621)	44.23 (34.61-56.48)	0.9 (0.78-1.01)
Uzbekistan		33310 (28678-38098)	238.79 (210.48-267.58)	98635 (85672-111586)	294.56 (259.4-330.71)	0.85 (0.75-0.95)		2012 (1727-2304)	11.4 (10.13-12.74)	5043 (4457-5634)	14.03 (12.48-15.6)	0.83 (0.72-0.93)		3 (2-5)	0.03 (0.02-0.06)	59 (49-71)	0.27 (0.22-0.33)	5.29 (3.8-6.8)		4537 (3020-6383)	32.4 (21.71-45.12)	14774 (10286-20331)	44.99 (31.69-61.11)	1.38 (1.19-1.57)
Vanuatu		47 (37-57)	47.57 (39.18-56.9)	149 (122-177)	60.47 (50.84-71.24)	0.75 (0.71-0.78)		3 (3-4)	2.48 (2.13-2.87)	9 (7-10)	3.1 (2.68-3.53)	0.68 (0.64-0.71)		0 (0-0)	0 (0-0)	0 (0-0)	0 (0-0)	-0.28 (-0.4--0.15)		7 (4-10)	6.64 (4.34-9.74)	21 (13-30)	8.3 (5.51-12.06)	0.7 (0.67-0.73)
Venezuela (Bolivarian Republic of)		26916 (23204-30849)	220.03 (193.96-247.45)	97444 (87319-109400)	318.11 (283.66-357.81)	1.17 (1.03-1.31)		1852 (1628-2068)	12.82 (11.61-14.1)	5297 (4796-5805)	17.99 (16.27-19.73)	1.07 (0.95-1.19)		90 (82-98)	1.03 (0.94-1.13)	250 (188-326)	0.87 (0.66-1.14)	-0.96 (-1.21--0.7)		5762 (4536-7259)	50.56 (40.86-62.12)	18474 (14019-23910)	60.85 (46.17-78.69)	0.46 (0.37-0.54)
Viet Nam		34788 (29112-41339)	73.52 (62.53-86.79)	131053 (110969-153400)	121.27 (103.49-140.66)	1.6 (1.56-1.63)		2222 (1914-2572)	4.13 (3.58-4.72)	7667 (6708-8792)	6.98 (6.12-7.93)	1.65 (1.61-1.69)		88 (47-126)	0.25 (0.13-0.36)	195 (112-272)	0.24 (0.14-0.34)	-0.05 (-0.14-0.03)		6549 (4750-8771)	14.49 (10.72-19.27)	21257 (15335-28993)	20.32 (15-27.3)	1.09 (1.07-1.11)
Yemen		3632 (2928-4400)	46.23 (38.44-55.14)	14376 (11750-17292)	60.4 (50.45-71.73)	1.02 (0.93-1.11)		240 (197-287)	2.3 (1.94-2.68)	901 (749-1056)	2.97 (2.56-3.43)	1 (0.91-1.09)		4 (2-6)	0.08 (0.04-0.13)	16 (10-27)	0.12 (0.07-0.19)	1.7 (1.49-1.9)		614 (431-847)	8.15 (5.81-11.23)	2472 (1747-3456)	11.02 (7.95-15.26)	1.18 (1.09-1.26)
Zambia		2955 (2497-3513)	74.47 (65.11-86.04)	10111 (8500-12075)	96.07 (84.11-110.08)	0.88 (0.72-1.03)		219 (191-252)	4.53 (4.04-5)	765 (661-878)	5.79 (5.18-6.45)	0.86 (0.71-1.01)		1 (0-9)	0.04 (0.01-0.36)	1 (0-13)	0.02 (0.01-0.24)	-2.21 (-2.44--1.98)		431 (280-702)	10.84 (7.18-18.23)	1404 (898-2059)	13.2 (8.74-18.88)	0.64 (0.5-0.78)
Zimbabwe		5901 (4922-7027)	101.04 (86.23-117.4)	10934 (9155-12866)	103.18 (88.88-118.88)	-0.25 (-0.41--0.09)		408 (345-476)	5.46 (4.73-6.12)	714 (608-822)	5.55 (4.91-6.25)	-0.23 (-0.39--0.08)		16 (8-22)	0.46 (0.23-0.61)	33 (15-47)	0.52 (0.24-0.72)	0.82 (0.42-1.22)		1269 (949-1656)	23.85 (17.81-30.25)	2477 (1821-3163)	26.08 (18.84-32.87)	0.34 (0.15-0.54)
Num_1990: numbers in 1990; ASR_1990: age-standardized rates in 1990; Num_2021: numbers in 2021; ASR_2021: age-standardized rates in 1990; EAPC_CI: estimated annual percentage change (95% CI).
