# Supplementary material for: Rheumatoid arthritis continues to increase in low-middle SDI and low SDI quintiles based on GBD 1990–2021
Source: Research Square preprint supplement (doi:10.21203/rs.3.rs-7036091/v1), 2025-07-15
Supplement: Supplementary file 3 [file 736cca9691993d8060f6ef42.xlsx]

## Sheet: age
measure_id	measure_name	location_id	location_name	sex_id	sex_name	age_id	age_name	cause_id	cause_name	metric_id	metric_name	year	val	upper	lower
1	Deaths	1	Global	3	Both	6	5-9 years	627	Rheumatoid arthritis	1	Number	1990	46.5865	59.436	39.3819
1	Deaths	1	Global	3	Both	6	5-9 years	627	Rheumatoid arthritis	2	Percent	1990	5.76738e-05	7.30574e-05	4.82655e-05
1	Deaths	1	Global	3	Both	6	5-9 years	627	Rheumatoid arthritis	3	Rate	1990	0.00798356	0.0101856	0.0067489
1	Deaths	1	Global	3	Both	7	10-14 years	627	Rheumatoid arthritis	1	Number	1990	56.9287	71.4023	47.7353
1	Deaths	1	Global	3	Both	7	10-14 years	627	Rheumatoid arthritis	2	Percent	1990	0.000123948	0.000155727	0.000103913
1	Deaths	1	Global	3	Both	7	10-14 years	627	Rheumatoid arthritis	3	Rate	1990	0.0106273	0.0133292	0.00891112
1	Deaths	1	Global	3	Both	8	15-19 years	627	Rheumatoid arthritis	1	Number	1990	84.4252	104.652	69.3355
1	Deaths	1	Global	3	Both	8	15-19 years	627	Rheumatoid arthritis	2	Percent	1990	0.000119531	0.000149543	9.91969e-05
1	Deaths	1	Global	3	Both	8	15-19 years	627	Rheumatoid arthritis	3	Rate	1990	0.0162536	0.0201478	0.0133485
1	Deaths	1	Global	3	Both	9	20-24 years	627	Rheumatoid arthritis	1	Number	1990	96.9289	120.437	78.0525
1	Deaths	1	Global	3	Both	9	20-24 years	627	Rheumatoid arthritis	2	Percent	1990	0.000115514	0.000142916	9.48197e-05
1	Deaths	1	Global	3	Both	9	20-24 years	627	Rheumatoid arthritis	3	Rate	1990	0.0196975	0.0244747	0.0158615
1	Deaths	1	Global	3	Both	10	25-29 years	627	Rheumatoid arthritis	1	Number	1990	117.873	143.619	98.2441
1	Deaths	1	Global	3	Both	10	25-29 years	627	Rheumatoid arthritis	2	Percent	1990	0.000141573	0.000170501	0.000119181
1	Deaths	1	Global	3	Both	10	25-29 years	627	Rheumatoid arthritis	3	Rate	1990	0.0266307	0.0324474	0.022196
1	Deaths	1	Global	3	Both	11	30-34 years	627	Rheumatoid arthritis	1	Number	1990	160.17	189.934	135.369
1	Deaths	1	Global	3	Both	11	30-34 years	627	Rheumatoid arthritis	2	Percent	1990	0.000183058	0.000216403	0.000154867
1	Deaths	1	Global	3	Both	11	30-34 years	627	Rheumatoid arthritis	3	Rate	1990	0.0415571	0.0492794	0.0351222
1	Deaths	1	Global	3	Both	12	35-39 years	627	Rheumatoid arthritis	1	Number	1990	248.454	290.655	210.23
1	Deaths	1	Global	3	Both	12	35-39 years	627	Rheumatoid arthritis	2	Percent	1990	0.000241672	0.000282348	0.00020514
1	Deaths	1	Global	3	Both	12	35-39 years	627	Rheumatoid arthritis	3	Rate	1990	0.0705346	0.0825152	0.0596831
1	Deaths	1	Global	3	Both	13	40-44 years	627	Rheumatoid arthritis	1	Number	1990	329.623	382.132	285.78
1	Deaths	1	Global	3	Both	13	40-44 years	627	Rheumatoid arthritis	2	Percent	1990	0.000287446	0.000338728	0.00025012
1	Deaths	1	Global	3	Both	13	40-44 years	627	Rheumatoid arthritis	3	Rate	1990	0.115059	0.133388	0.0997552
1	Deaths	1	Global	3	Both	14	45-49 years	627	Rheumatoid arthritis	1	Number	1990	471.066	548.422	410.545
1	Deaths	1	Global	3	Both	14	45-49 years	627	Rheumatoid arthritis	2	Percent	1990	0.000355719	0.000409905	0.000310424
1	Deaths	1	Global	3	Both	14	45-49 years	627	Rheumatoid arthritis	3	Rate	1990	0.202875	0.23619	0.17681
1	Deaths	1	Global	3	Both	15	50-54 years	627	Rheumatoid arthritis	1	Number	1990	817.438	925.527	725.687
1	Deaths	1	Global	3	Both	15	50-54 years	627	Rheumatoid arthritis	2	Percent	1990	0.000433524	0.000489802	0.000385075
1	Deaths	1	Global	3	Both	15	50-54 years	627	Rheumatoid arthritis	3	Rate	1990	0.384547	0.435395	0.341385
1	Deaths	1	Global	3	Both	16	55-59 years	627	Rheumatoid arthritis	1	Number	1990	1327.31	1489.26	1178.69
1	Deaths	1	Global	3	Both	16	55-59 years	627	Rheumatoid arthritis	2	Percent	1990	0.000545088	0.00060909	0.000482213
1	Deaths	1	Global	3	Both	16	55-59 years	627	Rheumatoid arthritis	3	Rate	1990	0.716693	0.804135	0.636442
1	Deaths	1	Global	3	Both	17	60-64 years	627	Rheumatoid arthritis	1	Number	1990	2217.19	2510.6	1972.72
1	Deaths	1	Global	3	Both	17	60-64 years	627	Rheumatoid arthritis	2	Percent	1990	0.000700947	0.000796079	0.000623022
1	Deaths	1	Global	3	Both	17	60-64 years	627	Rheumatoid arthritis	3	Rate	1990	1.38049	1.56317	1.22827
1	Deaths	1	Global	3	Both	18	65-69 years	627	Rheumatoid arthritis	1	Number	1990	3020.32	3408.46	2674.8
1	Deaths	1	Global	3	Both	18	65-69 years	627	Rheumatoid arthritis	2	Percent	1990	0.000837048	0.000947087	0.000740102
1	Deaths	1	Global	3	Both	18	65-69 years	627	Rheumatoid arthritis	3	Rate	1990	2.44344	2.75744	2.16391
1	Deaths	1	Global	3	Both	19	70-74 years	627	Rheumatoid arthritis	1	Number	1990	3373.24	3869.86	2952.19
1	Deaths	1	Global	3	Both	19	70-74 years	627	Rheumatoid arthritis	2	Percent	1990	0.00087529	0.00100064	0.00076403
1	Deaths	1	Global	3	Both	19	70-74 years	627	Rheumatoid arthritis	3	Rate	1990	3.9844	4.57099	3.48706
1	Deaths	1	Global	3	Both	20	75-79 years	627	Rheumatoid arthritis	1	Number	1990	3836	4262.73	3405.1
1	Deaths	1	Global	3	Both	20	75-79 years	627	Rheumatoid arthritis	2	Percent	1990	0.000904076	0.00100385	0.000801924
1	Deaths	1	Global	3	Both	20	75-79 years	627	Rheumatoid arthritis	3	Rate	1990	6.23178	6.92501	5.53176
1	Deaths	1	Global	3	Both	30	80-84 years	627	Rheumatoid arthritis	1	Number	1990	2814.85	3185.35	2388.2
1	Deaths	1	Global	3	Both	30	80-84 years	627	Rheumatoid arthritis	2	Percent	1990	0.000750966	0.000853321	0.000640562
1	Deaths	1	Global	3	Both	30	80-84 years	627	Rheumatoid arthritis	3	Rate	1990	7.95696	9.00428	6.75091
1	Deaths	1	Global	3	Both	31	85-89 years	627	Rheumatoid arthritis	1	Number	1990	1850.81	2128.8	1545.96
1	Deaths	1	Global	3	Both	31	85-89 years	627	Rheumatoid arthritis	2	Percent	1990	0.000742413	0.000852369	0.000622847
1	Deaths	1	Global	3	Both	31	85-89 years	627	Rheumatoid arthritis	3	Rate	1990	12.2481	14.0877	10.2307
1	Deaths	1	Global	3	Both	32	90-94 years	627	Rheumatoid arthritis	1	Number	1990	636.697	733.418	507.186
1	Deaths	1	Global	3	Both	32	90-94 years	627	Rheumatoid arthritis	2	Percent	1990	0.000611526	0.000704561	0.000489273
1	Deaths	1	Global	3	Both	32	90-94 years	627	Rheumatoid arthritis	3	Rate	1990	14.8581	17.1152	11.8358
1	Deaths	1	Global	3	Both	235	95+ years	627	Rheumatoid arthritis	1	Number	1990	165.219	190.831	127.256
1	Deaths	1	Global	3	Both	235	95+ years	627	Rheumatoid arthritis	2	Percent	1990	0.00050145	0.000579405	0.000386937
1	Deaths	1	Global	3	Both	235	95+ years	627	Rheumatoid arthritis	3	Rate	1990	16.2284	18.7441	12.4995
1	Deaths	1	Global	3	Both	6	5-9 years	627	Rheumatoid arthritis	1	Number	1997	33.3113	43.1417	28.2513
1	Deaths	1	Global	3	Both	6	5-9 years	627	Rheumatoid arthritis	2	Percent	1997	4.45785e-05	5.77568e-05	3.78606e-05
1	Deaths	1	Global	3	Both	6	5-9 years	627	Rheumatoid arthritis	3	Rate	1997	0.00543026	0.00703277	0.0046054
1	Deaths	1	Global	3	Both	7	10-14 years	627	Rheumatoid arthritis	1	Number	1997	44.9906	58.5833	37.9902
1	Deaths	1	Global	3	Both	7	10-14 years	627	Rheumatoid arthritis	2	Percent	1997	9.80914e-05	0.000130352	8.27279e-05
1	Deaths	1	Global	3	Both	7	10-14 years	627	Rheumatoid arthritis	3	Rate	1997	0.00747608	0.00973478	0.00631282
1	Deaths	1	Global	3	Both	8	15-19 years	627	Rheumatoid arthritis	1	Number	1997	61.5175	77.0559	51.7752
1	Deaths	1	Global	3	Both	8	15-19 years	627	Rheumatoid arthritis	2	Percent	1997	8.87483e-05	0.000111471	7.48876e-05
1	Deaths	1	Global	3	Both	8	15-19 years	627	Rheumatoid arthritis	3	Rate	1997	0.0114454	0.0143363	0.00963281
1	Deaths	1	Global	3	Both	9	20-24 years	627	Rheumatoid arthritis	1	Number	1997	69.5978	88.3888	59.8265
1	Deaths	1	Global	3	Both	9	20-24 years	627	Rheumatoid arthritis	2	Percent	1997	7.91286e-05	0.000101544	6.75979e-05
1	Deaths	1	Global	3	Both	9	20-24 years	627	Rheumatoid arthritis	3	Rate	1997	0.013831	0.0175652	0.0118891
1	Deaths	1	Global	3	Both	10	25-29 years	627	Rheumatoid arthritis	1	Number	1997	93.0229	117.427	80.4645
1	Deaths	1	Global	3	Both	10	25-29 years	627	Rheumatoid arthritis	2	Percent	1997	9.70637e-05	0.000122784	8.33656e-05
1	Deaths	1	Global	3	Both	10	25-29 years	627	Rheumatoid arthritis	3	Rate	1997	0.0188788	0.0238315	0.0163301
1	Deaths	1	Global	3	Both	11	30-34 years	627	Rheumatoid arthritis	1	Number	1997	141.368	172.953	123.231
1	Deaths	1	Global	3	Both	11	30-34 years	627	Rheumatoid arthritis	2	Percent	1997	0.000131231	0.000162473	0.000113088
1	Deaths	1	Global	3	Both	11	30-34 years	627	Rheumatoid arthritis	3	Rate	1997	0.0305809	0.0374134	0.0266576
1	Deaths	1	Global	3	Both	12	35-39 years	627	Rheumatoid arthritis	1	Number	1997	201.063	232.219	175.651
1	Deaths	1	Global	3	Both	12	35-39 years	627	Rheumatoid arthritis	2	Percent	1997	0.000169611	0.000196974	0.000147015
1	Deaths	1	Global	3	Both	12	35-39 years	627	Rheumatoid arthritis	3	Rate	1997	0.0511576	0.0590849	0.0446918
1	Deaths	1	Global	3	Both	13	40-44 years	627	Rheumatoid arthritis	1	Number	1997	330.648	380.176	291.906
1	Deaths	1	Global	3	Both	13	40-44 years	627	Rheumatoid arthritis	2	Percent	1997	0.000227888	0.000264186	0.000199475
1	Deaths	1	Global	3	Both	13	40-44 years	627	Rheumatoid arthritis	3	Rate	1997	0.0924851	0.106338	0.0816485
1	Deaths	1	Global	3	Both	14	45-49 years	627	Rheumatoid arthritis	1	Number	1997	504.753	578.259	446.371
1	Deaths	1	Global	3	Both	14	45-49 years	627	Rheumatoid arthritis	2	Percent	1997	0.000307364	0.000350841	0.000272143
1	Deaths	1	Global	3	Both	14	45-49 years	627	Rheumatoid arthritis	3	Rate	1997	0.169338	0.193999	0.149752
1	Deaths	1	Global	3	Both	15	50-54 years	627	Rheumatoid arthritis	1	Number	1997	740.737	823.314	663.721
1	Deaths	1	Global	3	Both	15	50-54 years	627	Rheumatoid arthritis	2	Percent	1997	0.000387037	0.000438305	0.000348148
1	Deaths	1	Global	3	Both	15	50-54 years	627	Rheumatoid arthritis	3	Rate	1997	0.322652	0.35862	0.289105
1	Deaths	1	Global	3	Both	16	55-59 years	627	Rheumatoid arthritis	1	Number	1997	1240.13	1393.17	1108.05
1	Deaths	1	Global	3	Both	16	55-59 years	627	Rheumatoid arthritis	2	Percent	1997	0.000492678	0.000552597	0.00043646
1	Deaths	1	Global	3	Both	16	55-59 years	627	Rheumatoid arthritis	3	Rate	1997	0.612679	0.688289	0.547427
1	Deaths	1	Global	3	Both	17	60-64 years	627	Rheumatoid arthritis	1	Number	1997	2157.61	2487.37	1899.46
1	Deaths	1	Global	3	Both	17	60-64 years	627	Rheumatoid arthritis	2	Percent	1997	0.000651005	0.000754861	0.000571022
1	Deaths	1	Global	3	Both	17	60-64 years	627	Rheumatoid arthritis	3	Rate	1997	1.2155	1.40127	1.07007
1	Deaths	1	Global	3	Both	18	65-69 years	627	Rheumatoid arthritis	1	Number	1997	3200.73	3708.27	2812.14
1	Deaths	1	Global	3	Both	18	65-69 years	627	Rheumatoid arthritis	2	Percent	1997	0.000774973	0.00089333	0.000681216
1	Deaths	1	Global	3	Both	18	65-69 years	627	Rheumatoid arthritis	3	Rate	1997	2.17774	2.52306	1.91334
1	Deaths	1	Global	3	Both	19	70-74 years	627	Rheumatoid arthritis	1	Number	1997	3887.99	4473.19	3404.95
1	Deaths	1	Global	3	Both	19	70-74 years	627	Rheumatoid arthritis	2	Percent	1997	0.000832179	0.000955425	0.000729682
1	Deaths	1	Global	3	Both	19	70-74 years	627	Rheumatoid arthritis	3	Rate	1997	3.55574	4.09093	3.11398
1	Deaths	1	Global	3	Both	20	75-79 years	627	Rheumatoid arthritis	1	Number	1997	3874.98	4333.25	3383.41
1	Deaths	1	Global	3	Both	20	75-79 years	627	Rheumatoid arthritis	2	Percent	1997	0.00087401	0.000974413	0.000763534
1	Deaths	1	Global	3	Both	20	75-79 years	627	Rheumatoid arthritis	3	Rate	1997	5.58738	6.24817	4.87858
1	Deaths	1	Global	3	Both	30	80-84 years	627	Rheumatoid arthritis	1	Number	1997	2967.34	3390.48	2479.11
1	Deaths	1	Global	3	Both	30	80-84 years	627	Rheumatoid arthritis	2	Percent	1997	0.000724514	0.000827623	0.000606852
1	Deaths	1	Global	3	Both	30	80-84 years	627	Rheumatoid arthritis	3	Rate	1997	7.35469	8.40346	6.14459
1	Deaths	1	Global	3	Both	31	85-89 years	627	Rheumatoid arthritis	1	Number	1997	2039.78	2342.25	1683.65
1	Deaths	1	Global	3	Both	31	85-89 years	627	Rheumatoid arthritis	2	Percent	1997	0.000660729	0.000758044	0.000545631
1	Deaths	1	Global	3	Both	31	85-89 years	627	Rheumatoid arthritis	3	Rate	1997	10.3792	11.9183	8.56709
1	Deaths	1	Global	3	Both	32	90-94 years	627	Rheumatoid arthritis	1	Number	1997	808.388	941.171	640.218
1	Deaths	1	Global	3	Both	32	90-94 years	627	Rheumatoid arthritis	2	Percent	1997	0.000540643	0.000630616	0.000428976
1	Deaths	1	Global	3	Both	32	90-94 years	627	Rheumatoid arthritis	3	Rate	1997	12.6157	14.6879	9.99124
1	Deaths	1	Global	3	Both	235	95+ years	627	Rheumatoid arthritis	1	Number	1997	213.516	245.37	164.397
1	Deaths	1	Global	3	Both	235	95+ years	627	Rheumatoid arthritis	2	Percent	1997	0.000463634	0.000531955	0.00035729
1	Deaths	1	Global	3	Both	235	95+ years	627	Rheumatoid arthritis	3	Rate	1997	14.6953	16.8877	11.3147
1	Deaths	1	Global	3	Both	6	5-9 years	627	Rheumatoid arthritis	1	Number	1992	43.8085	56.0864	37.0311
1	Deaths	1	Global	3	Both	6	5-9 years	627	Rheumatoid arthritis	2	Percent	1992	5.49141e-05	7.06605e-05	4.67154e-05
1	Deaths	1	Global	3	Both	6	5-9 years	627	Rheumatoid arthritis	3	Rate	1992	0.00728235	0.00932331	0.00615573
1	Deaths	1	Global	3	Both	7	10-14 years	627	Rheumatoid arthritis	1	Number	1992	52.0934	67.6472	43.5018
1	Deaths	1	Global	3	Both	7	10-14 years	627	Rheumatoid arthritis	2	Percent	1992	0.000114673	0.00014843	9.67751e-05
1	Deaths	1	Global	3	Both	7	10-14 years	627	Rheumatoid arthritis	3	Rate	1992	0.00947744	0.0123072	0.00791437
1	Deaths	1	Global	3	Both	8	15-19 years	627	Rheumatoid arthritis	1	Number	1992	75.7067	93.2673	63.2864
1	Deaths	1	Global	3	Both	8	15-19 years	627	Rheumatoid arthritis	2	Percent	1992	0.000112305	0.000138382	9.40321e-05
1	Deaths	1	Global	3	Both	8	15-19 years	627	Rheumatoid arthritis	3	Rate	1992	0.0146351	0.0180298	0.0122341
1	Deaths	1	Global	3	Both	9	20-24 years	627	Rheumatoid arthritis	1	Number	1992	90.4448	112.535	76.0819
1	Deaths	1	Global	3	Both	9	20-24 years	627	Rheumatoid arthritis	2	Percent	1992	0.000107265	0.000132052	9.06321e-05
1	Deaths	1	Global	3	Both	9	20-24 years	627	Rheumatoid arthritis	3	Rate	1992	0.0180656	0.0224778	0.0151967
1	Deaths	1	Global	3	Both	10	25-29 years	627	Rheumatoid arthritis	1	Number	1992	119.109	142.564	102.419
1	Deaths	1	Global	3	Both	10	25-29 years	627	Rheumatoid arthritis	2	Percent	1992	0.000135913	0.000162823	0.000116504
1	Deaths	1	Global	3	Both	10	25-29 years	627	Rheumatoid arthritis	3	Rate	1992	0.0255095	0.0305329	0.021935
1	Deaths	1	Global	3	Both	11	30-34 years	627	Rheumatoid arthritis	1	Number	1992	152.816	181.956	131.027
1	Deaths	1	Global	3	Both	11	30-34 years	627	Rheumatoid arthritis	2	Percent	1992	0.00016499	0.000194613	0.000141132
1	Deaths	1	Global	3	Both	11	30-34 years	627	Rheumatoid arthritis	3	Rate	1992	0.0383079	0.0456127	0.0328457
1	Deaths	1	Global	3	Both	12	35-39 years	627	Rheumatoid arthritis	1	Number	1992	243.899	288.466	208.365
1	Deaths	1	Global	3	Both	12	35-39 years	627	Rheumatoid arthritis	2	Percent	1992	0.000223627	0.000265885	0.000191841
1	Deaths	1	Global	3	Both	12	35-39 years	627	Rheumatoid arthritis	3	Rate	1992	0.0662059	0.0783034	0.0565604
1	Deaths	1	Global	3	Both	13	40-44 years	627	Rheumatoid arthritis	1	Number	1992	341.56	403.288	299.926
1	Deaths	1	Global	3	Both	13	40-44 years	627	Rheumatoid arthritis	2	Percent	1992	0.000270617	0.000316501	0.000238194
1	Deaths	1	Global	3	Both	13	40-44 years	627	Rheumatoid arthritis	3	Rate	1992	0.10993	0.129797	0.0965302
1	Deaths	1	Global	3	Both	14	45-49 years	627	Rheumatoid arthritis	1	Number	1992	467.908	542.519	410.116
1	Deaths	1	Global	3	Both	14	45-49 years	627	Rheumatoid arthritis	2	Percent	1992	0.000341736	0.00039018	0.000301162
1	Deaths	1	Global	3	Both	14	45-49 years	627	Rheumatoid arthritis	3	Rate	1992	0.192087	0.222717	0.168362
1	Deaths	1	Global	3	Both	15	50-54 years	627	Rheumatoid arthritis	1	Number	1992	783.755	887.103	695.096
1	Deaths	1	Global	3	Both	15	50-54 years	627	Rheumatoid arthritis	2	Percent	1992	0.000410589	0.000462797	0.000365671
1	Deaths	1	Global	3	Both	15	50-54 years	627	Rheumatoid arthritis	3	Rate	1992	0.362335	0.410114	0.321348
1	Deaths	1	Global	3	Both	16	55-59 years	627	Rheumatoid arthritis	1	Number	1992	1280.16	1459.66	1134.82
1	Deaths	1	Global	3	Both	16	55-59 years	627	Rheumatoid arthritis	2	Percent	1992	0.000517787	0.000583411	0.000463266
1	Deaths	1	Global	3	Both	16	55-59 years	627	Rheumatoid arthritis	3	Rate	1992	0.669879	0.763804	0.593825
1	Deaths	1	Global	3	Both	17	60-64 years	627	Rheumatoid arthritis	1	Number	1992	2200.96	2504.93	1951.45
1	Deaths	1	Global	3	Both	17	60-64 years	627	Rheumatoid arthritis	2	Percent	1992	0.000673995	0.000767982	0.000602489
1	Deaths	1	Global	3	Both	17	60-64 years	627	Rheumatoid arthritis	3	Rate	1992	1.32351	1.50629	1.17347
1	Deaths	1	Global	3	Both	18	65-69 years	627	Rheumatoid arthritis	1	Number	1992	3048.6	3462.16	2708.42
1	Deaths	1	Global	3	Both	18	65-69 years	627	Rheumatoid arthritis	2	Percent	1992	0.000807033	0.000915727	0.000717693
1	Deaths	1	Global	3	Both	18	65-69 years	627	Rheumatoid arthritis	3	Rate	1992	2.3221	2.63711	2.06299
1	Deaths	1	Global	3	Both	19	70-74 years	627	Rheumatoid arthritis	1	Number	1992	3512.28	4016.33	3072.49
1	Deaths	1	Global	3	Both	19	70-74 years	627	Rheumatoid arthritis	2	Percent	1992	0.000860057	0.000977452	0.000747956
1	Deaths	1	Global	3	Both	19	70-74 years	627	Rheumatoid arthritis	3	Rate	1992	3.84255	4.394	3.36141
1	Deaths	1	Global	3	Both	20	75-79 years	627	Rheumatoid arthritis	1	Number	1992	3747.99	4162.14	3312.61
1	Deaths	1	Global	3	Both	20	75-79 years	627	Rheumatoid arthritis	2	Percent	1992	0.000888212	0.000979969	0.000785383
1	Deaths	1	Global	3	Both	20	75-79 years	627	Rheumatoid arthritis	3	Rate	1992	6.06944	6.74011	5.36439
1	Deaths	1	Global	3	Both	30	80-84 years	627	Rheumatoid arthritis	1	Number	1992	2899.07	3296.86	2485
1	Deaths	1	Global	3	Both	30	80-84 years	627	Rheumatoid arthritis	2	Percent	1992	0.00074037	0.000840233	0.000631912
1	Deaths	1	Global	3	Both	30	80-84 years	627	Rheumatoid arthritis	3	Rate	1992	7.72941	8.78999	6.62543
1	Deaths	1	Global	3	Both	31	85-89 years	627	Rheumatoid arthritis	1	Number	1992	1933.49	2247.58	1607.13
1	Deaths	1	Global	3	Both	31	85-89 years	627	Rheumatoid arthritis	2	Percent	1992	0.000720209	0.000834491	0.000601305
1	Deaths	1	Global	3	Both	31	85-89 years	627	Rheumatoid arthritis	3	Rate	1992	11.6725	13.5686	9.70227
1	Deaths	1	Global	3	Both	32	90-94 years	627	Rheumatoid arthritis	1	Number	1992	680.248	790.122	540.239
1	Deaths	1	Global	3	Both	32	90-94 years	627	Rheumatoid arthritis	2	Percent	1992	0.000589262	0.000685381	0.000468674
1	Deaths	1	Global	3	Both	32	90-94 years	627	Rheumatoid arthritis	3	Rate	1992	14.0438	16.3122	11.1533
1	Deaths	1	Global	3	Both	235	95+ years	627	Rheumatoid arthritis	1	Number	1992	180.346	209.022	138.757
1	Deaths	1	Global	3	Both	235	95+ years	627	Rheumatoid arthritis	2	Percent	1992	0.000501909	0.000582253	0.000385617
1	Deaths	1	Global	3	Both	235	95+ years	627	Rheumatoid arthritis	3	Rate	1992	16.2742	18.862	12.5213
1	Deaths	1	Global	3	Both	6	5-9 years	627	Rheumatoid arthritis	1	Number	1994	39.0296	50.9263	32.993
1	Deaths	1	Global	3	Both	6	5-9 years	627	Rheumatoid arthritis	2	Percent	1994	4.69696e-05	6.06296e-05	3.99635e-05
1	Deaths	1	Global	3	Both	6	5-9 years	627	Rheumatoid arthritis	3	Rate	1994	0.00636351	0.00830317	0.00537928
1	Deaths	1	Global	3	Both	7	10-14 years	627	Rheumatoid arthritis	1	Number	1994	48.0692	63.4463	40.386
1	Deaths	1	Global	3	Both	7	10-14 years	627	Rheumatoid arthritis	2	Percent	1994	0.000100955	0.000132298	8.56824e-05
1	Deaths	1	Global	3	Both	7	10-14 years	627	Rheumatoid arthritis	3	Rate	1994	0.00845803	0.0111637	0.00710613
1	Deaths	1	Global	3	Both	8	15-19 years	627	Rheumatoid arthritis	1	Number	1994	67.8303	83.022	57.2658
1	Deaths	1	Global	3	Both	8	15-19 years	627	Rheumatoid arthritis	2	Percent	1994	7.6971e-05	0.000100304	6.16271e-05
1	Deaths	1	Global	3	Both	8	15-19 years	627	Rheumatoid arthritis	3	Rate	1994	0.0130634	0.0159892	0.0110288
1	Deaths	1	Global	3	Both	9	20-24 years	627	Rheumatoid arthritis	1	Number	1994	80.4792	99.327	68.9201
1	Deaths	1	Global	3	Both	9	20-24 years	627	Rheumatoid arthritis	2	Percent	1994	8.07221e-05	0.000100783	6.74076e-05
1	Deaths	1	Global	3	Both	9	20-24 years	627	Rheumatoid arthritis	3	Rate	1994	0.0159588	0.0196963	0.0136667
1	Deaths	1	Global	3	Both	10	25-29 years	627	Rheumatoid arthritis	1	Number	1994	108.643	134.864	93.9562
1	Deaths	1	Global	3	Both	10	25-29 years	627	Rheumatoid arthritis	2	Percent	1994	0.000114102	0.000143436	9.84077e-05
1	Deaths	1	Global	3	Both	10	25-29 years	627	Rheumatoid arthritis	3	Rate	1994	0.0226192	0.0280783	0.0195614
1	Deaths	1	Global	3	Both	11	30-34 years	627	Rheumatoid arthritis	1	Number	1994	150.539	180.836	133.235
1	Deaths	1	Global	3	Both	11	30-34 years	627	Rheumatoid arthritis	2	Percent	1994	0.000146482	0.000176785	0.000127354
1	Deaths	1	Global	3	Both	11	30-34 years	627	Rheumatoid arthritis	3	Rate	1994	0.0353666	0.0424845	0.0313015
1	Deaths	1	Global	3	Both	12	35-39 years	627	Rheumatoid arthritis	1	Number	1994	228.106	266.177	200.209
1	Deaths	1	Global	3	Both	12	35-39 years	627	Rheumatoid arthritis	2	Percent	1994	0.000195378	0.000224638	0.000171386
1	Deaths	1	Global	3	Both	12	35-39 years	627	Rheumatoid arthritis	3	Rate	1994	0.0605901	0.0707026	0.0531801
1	Deaths	1	Global	3	Both	13	40-44 years	627	Rheumatoid arthritis	1	Number	1994	345.173	405.183	305.313
1	Deaths	1	Global	3	Both	13	40-44 years	627	Rheumatoid arthritis	2	Percent	1994	0.00024755	0.000287493	0.00021998
1	Deaths	1	Global	3	Both	13	40-44 years	627	Rheumatoid arthritis	3	Rate	1994	0.104339	0.122479	0.0922902
1	Deaths	1	Global	3	Both	14	45-49 years	627	Rheumatoid arthritis	1	Number	1994	487.344	556.615	429.446
1	Deaths	1	Global	3	Both	14	45-49 years	627	Rheumatoid arthritis	2	Percent	1994	0.000323184	0.000369105	0.000285796
1	Deaths	1	Global	3	Both	14	45-49 years	627	Rheumatoid arthritis	3	Rate	1994	0.183743	0.209861	0.161914
1	Deaths	1	Global	3	Both	15	50-54 years	627	Rheumatoid arthritis	1	Number	1994	762.089	857.899	681.389
1	Deaths	1	Global	3	Both	15	50-54 years	627	Rheumatoid arthritis	2	Percent	1994	0.000394077	0.000445488	0.000352553
1	Deaths	1	Global	3	Both	15	50-54 years	627	Rheumatoid arthritis	3	Rate	1994	0.349343	0.393263	0.31235
1	Deaths	1	Global	3	Both	16	55-59 years	627	Rheumatoid arthritis	1	Number	1994	1301.23	1441.45	1161.2
1	Deaths	1	Global	3	Both	16	55-59 years	627	Rheumatoid arthritis	2	Percent	1994	0.00050351	0.000557522	0.000454141
1	Deaths	1	Global	3	Both	16	55-59 years	627	Rheumatoid arthritis	3	Rate	1994	0.660509	0.731688	0.589429
1	Deaths	1	Global	3	Both	17	60-64 years	627	Rheumatoid arthritis	1	Number	1994	2200.74	2487.34	1958.81
1	Deaths	1	Global	3	Both	17	60-64 years	627	Rheumatoid arthritis	2	Percent	1994	0.000657586	0.000749804	0.000583776
1	Deaths	1	Global	3	Both	17	60-64 years	627	Rheumatoid arthritis	3	Rate	1994	1.2952	1.46388	1.15282
1	Deaths	1	Global	3	Both	18	65-69 years	627	Rheumatoid arthritis	1	Number	1994	3142.54	3569.6	2775.28
1	Deaths	1	Global	3	Both	18	65-69 years	627	Rheumatoid arthritis	2	Percent	1994	0.000780013	0.000888204	0.00069245
1	Deaths	1	Global	3	Both	18	65-69 years	627	Rheumatoid arthritis	3	Rate	1994	2.26335	2.57093	1.99884
1	Deaths	1	Global	3	Both	19	70-74 years	627	Rheumatoid arthritis	1	Number	1994	3726.42	4229.67	3287.59
1	Deaths	1	Global	3	Both	19	70-74 years	627	Rheumatoid arthritis	2	Percent	1994	0.000845185	0.000959724	0.000741876
1	Deaths	1	Global	3	Both	19	70-74 years	627	Rheumatoid arthritis	3	Rate	1994	3.75618	4.26346	3.31385
1	Deaths	1	Global	3	Both	20	75-79 years	627	Rheumatoid arthritis	1	Number	1994	3647.73	4079.71	3201.79
1	Deaths	1	Global	3	Both	20	75-79 years	627	Rheumatoid arthritis	2	Percent	1994	0.000868597	0.000974515	0.000762512
1	Deaths	1	Global	3	Both	20	75-79 years	627	Rheumatoid arthritis	3	Rate	1994	5.86397	6.5584	5.1471
1	Deaths	1	Global	3	Both	30	80-84 years	627	Rheumatoid arthritis	1	Number	1994	2950.68	3374.94	2515.6
1	Deaths	1	Global	3	Both	30	80-84 years	627	Rheumatoid arthritis	2	Percent	1994	0.000716555	0.000816912	0.000610895
1	Deaths	1	Global	3	Both	30	80-84 years	627	Rheumatoid arthritis	3	Rate	1994	7.48038	8.55594	6.37739
1	Deaths	1	Global	3	Both	31	85-89 years	627	Rheumatoid arthritis	1	Number	1994	1969.58	2298.16	1627.99
1	Deaths	1	Global	3	Both	31	85-89 years	627	Rheumatoid arthritis	2	Percent	1994	0.000682668	0.000796446	0.000566338
1	Deaths	1	Global	3	Both	31	85-89 years	627	Rheumatoid arthritis	3	Rate	1994	11.0402	12.8821	9.12553
1	Deaths	1	Global	3	Both	32	90-94 years	627	Rheumatoid arthritis	1	Number	1994	722.992	850.214	573.769
1	Deaths	1	Global	3	Both	32	90-94 years	627	Rheumatoid arthritis	2	Percent	1994	0.000554576	0.000651349	0.000440672
1	Deaths	1	Global	3	Both	32	90-94 years	627	Rheumatoid arthritis	3	Rate	1994	13.2083	15.5325	10.4821
1	Deaths	1	Global	3	Both	235	95+ years	627	Rheumatoid arthritis	1	Number	1994	184.634	213.89	141.097
1	Deaths	1	Global	3	Both	235	95+ years	627	Rheumatoid arthritis	2	Percent	1994	0.000466654	0.000540251	0.000357103
1	Deaths	1	Global	3	Both	235	95+ years	627	Rheumatoid arthritis	3	Rate	1994	15.2461	17.6619	11.6511
1	Deaths	1	Global	3	Both	6	5-9 years	627	Rheumatoid arthritis	1	Number	1998	31.9798	41.9679	26.9262
1	Deaths	1	Global	3	Both	6	5-9 years	627	Rheumatoid arthritis	2	Percent	1998	4.33277e-05	5.61107e-05	3.63465e-05
1	Deaths	1	Global	3	Both	6	5-9 years	627	Rheumatoid arthritis	3	Rate	1998	0.00524242	0.00687978	0.004414
1	Deaths	1	Global	3	Both	7	10-14 years	627	Rheumatoid arthritis	1	Number	1998	44.2852	58.2638	37.0636
1	Deaths	1	Global	3	Both	7	10-14 years	627	Rheumatoid arthritis	2	Percent	1998	9.62023e-05	0.000128907	8.0254e-05
1	Deaths	1	Global	3	Both	7	10-14 years	627	Rheumatoid arthritis	3	Rate	1998	0.00724003	0.00952536	0.0060594
1	Deaths	1	Global	3	Both	8	15-19 years	627	Rheumatoid arthritis	1	Number	1998	61.0937	78.0021	50.6754
1	Deaths	1	Global	3	Both	8	15-19 years	627	Rheumatoid arthritis	2	Percent	1998	8.57511e-05	0.000109956	7.25361e-05
1	Deaths	1	Global	3	Both	8	15-19 years	627	Rheumatoid arthritis	3	Rate	1998	0.0111759	0.014269	0.00927011
1	Deaths	1	Global	3	Both	9	20-24 years	627	Rheumatoid arthritis	1	Number	1998	68.1202	88.1039	58.5873
1	Deaths	1	Global	3	Both	9	20-24 years	627	Rheumatoid arthritis	2	Percent	1998	7.64111e-05	9.82972e-05	6.54695e-05
1	Deaths	1	Global	3	Both	9	20-24 years	627	Rheumatoid arthritis	3	Rate	1998	0.0135258	0.0174938	0.011633
1	Deaths	1	Global	3	Both	10	25-29 years	627	Rheumatoid arthritis	1	Number	1998	92.3146	116.68	80.2947
1	Deaths	1	Global	3	Both	10	25-29 years	627	Rheumatoid arthritis	2	Percent	1998	9.44111e-05	0.000122294	8.06772e-05
1	Deaths	1	Global	3	Both	10	25-29 years	627	Rheumatoid arthritis	3	Rate	1998	0.0186223	0.0235373	0.0161976
1	Deaths	1	Global	3	Both	11	30-34 years	627	Rheumatoid arthritis	1	Number	1998	141.771	178.969	123.662
1	Deaths	1	Global	3	Both	11	30-34 years	627	Rheumatoid arthritis	2	Percent	1998	0.000128758	0.000162496	0.000109742
1	Deaths	1	Global	3	Both	11	30-34 years	627	Rheumatoid arthritis	3	Rate	1998	0.0302007	0.0381247	0.0263428
1	Deaths	1	Global	3	Both	12	35-39 years	627	Rheumatoid arthritis	1	Number	1998	207.502	244.198	179.162
1	Deaths	1	Global	3	Both	12	35-39 years	627	Rheumatoid arthritis	2	Percent	1998	0.000168692	0.00019969	0.000146004
1	Deaths	1	Global	3	Both	12	35-39 years	627	Rheumatoid arthritis	3	Rate	1998	0.0511616	0.0602094	0.0441742
1	Deaths	1	Global	3	Both	13	40-44 years	627	Rheumatoid arthritis	1	Number	1998	328.706	383.814	289.214
1	Deaths	1	Global	3	Both	13	40-44 years	627	Rheumatoid arthritis	2	Percent	1998	0.000224378	0.000262914	0.000196952
1	Deaths	1	Global	3	Both	13	40-44 years	627	Rheumatoid arthritis	3	Rate	1998	0.0908406	0.10607	0.0799266
1	Deaths	1	Global	3	Both	14	45-49 years	627	Rheumatoid arthritis	1	Number	1998	513.969	589.71	457.149
1	Deaths	1	Global	3	Both	14	45-49 years	627	Rheumatoid arthritis	2	Percent	1998	0.000305913	0.000351538	0.000269625
1	Deaths	1	Global	3	Both	14	45-49 years	627	Rheumatoid arthritis	3	Rate	1998	0.166603	0.191155	0.148185
1	Deaths	1	Global	3	Both	15	50-54 years	627	Rheumatoid arthritis	1	Number	1998	751.385	841.803	674.164
1	Deaths	1	Global	3	Both	15	50-54 years	627	Rheumatoid arthritis	2	Percent	1998	0.000387157	0.000435395	0.000348539
1	Deaths	1	Global	3	Both	15	50-54 years	627	Rheumatoid arthritis	3	Rate	1998	0.3153	0.353242	0.282896
1	Deaths	1	Global	3	Both	16	55-59 years	627	Rheumatoid arthritis	1	Number	1998	1233.39	1386.5	1093.29
1	Deaths	1	Global	3	Both	16	55-59 years	627	Rheumatoid arthritis	2	Percent	1998	0.000496611	0.000559765	0.000443184
1	Deaths	1	Global	3	Both	16	55-59 years	627	Rheumatoid arthritis	3	Rate	1998	0.606994	0.682347	0.538045
1	Deaths	1	Global	3	Both	17	60-64 years	627	Rheumatoid arthritis	1	Number	1998	2156.64	2489.6	1888.7
1	Deaths	1	Global	3	Both	17	60-64 years	627	Rheumatoid arthritis	2	Percent	1998	0.000648096	0.000745795	0.000567934
1	Deaths	1	Global	3	Both	17	60-64 years	627	Rheumatoid arthritis	3	Rate	1998	1.19362	1.3779	1.04532
1	Deaths	1	Global	3	Both	18	65-69 years	627	Rheumatoid arthritis	1	Number	1998	3231.09	3761.62	2822.47
1	Deaths	1	Global	3	Both	18	65-69 years	627	Rheumatoid arthritis	2	Percent	1998	0.000779893	0.00090241	0.000679048
1	Deaths	1	Global	3	Both	18	65-69 years	627	Rheumatoid arthritis	3	Rate	1998	2.17151	2.52807	1.89689
1	Deaths	1	Global	3	Both	19	70-74 years	627	Rheumatoid arthritis	1	Number	1998	3975.45	4578.34	3466.37
1	Deaths	1	Global	3	Both	19	70-74 years	627	Rheumatoid arthritis	2	Percent	1998	0.000829651	0.000951414	0.000720418
1	Deaths	1	Global	3	Both	19	70-74 years	627	Rheumatoid arthritis	3	Rate	1998	3.52527	4.0599	3.07384
1	Deaths	1	Global	3	Both	20	75-79 years	627	Rheumatoid arthritis	1	Number	1998	4007.77	4471.16	3504.24
1	Deaths	1	Global	3	Both	20	75-79 years	627	Rheumatoid arthritis	2	Percent	1998	0.000872477	0.000966302	0.000761024
1	Deaths	1	Global	3	Both	20	75-79 years	627	Rheumatoid arthritis	3	Rate	1998	5.51739	6.15534	4.8242
1	Deaths	1	Global	3	Both	30	80-84 years	627	Rheumatoid arthritis	1	Number	1998	2992.17	3411.49	2484.34
1	Deaths	1	Global	3	Both	30	80-84 years	627	Rheumatoid arthritis	2	Percent	1998	0.00073611	0.000837663	0.000611842
1	Deaths	1	Global	3	Both	30	80-84 years	627	Rheumatoid arthritis	3	Rate	1998	7.39664	8.43321	6.1413
1	Deaths	1	Global	3	Both	31	85-89 years	627	Rheumatoid arthritis	1	Number	1998	2076.52	2371.65	1703.33
1	Deaths	1	Global	3	Both	31	85-89 years	627	Rheumatoid arthritis	2	Percent	1998	0.000654737	0.000747042	0.000537567
1	Deaths	1	Global	3	Both	31	85-89 years	627	Rheumatoid arthritis	3	Rate	1998	10.2192	11.6716	8.3826
1	Deaths	1	Global	3	Both	32	90-94 years	627	Rheumatoid arthritis	1	Number	1998	844.125	981.313	665.943
1	Deaths	1	Global	3	Both	32	90-94 years	627	Rheumatoid arthritis	2	Percent	1998	0.000542994	0.000629985	0.000429447
1	Deaths	1	Global	3	Both	32	90-94 years	627	Rheumatoid arthritis	3	Rate	1998	12.5884	14.6343	9.93118
1	Deaths	1	Global	3	Both	235	95+ years	627	Rheumatoid arthritis	1	Number	1998	232.559	268.007	179.139
1	Deaths	1	Global	3	Both	235	95+ years	627	Rheumatoid arthritis	2	Percent	1998	0.000477197	0.000549476	0.000368079
1	Deaths	1	Global	3	Both	235	95+ years	627	Rheumatoid arthritis	3	Rate	1998	14.9689	17.2506	11.5305
1	Deaths	1	Global	3	Both	6	5-9 years	627	Rheumatoid arthritis	1	Number	1995	37.4947	48.936	31.7319
1	Deaths	1	Global	3	Both	6	5-9 years	627	Rheumatoid arthritis	2	Percent	1995	4.80401e-05	6.26529e-05	4.0895e-05
1	Deaths	1	Global	3	Both	6	5-9 years	627	Rheumatoid arthritis	3	Rate	1995	0.00609022	0.00794862	0.00515418
1	Deaths	1	Global	3	Both	7	10-14 years	627	Rheumatoid arthritis	1	Number	1995	47.421	62.8801	40.3057
1	Deaths	1	Global	3	Both	7	10-14 years	627	Rheumatoid arthritis	2	Percent	1995	0.00010227	0.000137035	8.77537e-05
1	Deaths	1	Global	3	Both	7	10-14 years	627	Rheumatoid arthritis	3	Rate	1995	0.00819149	0.0108619	0.00696239
1	Deaths	1	Global	3	Both	8	15-19 years	627	Rheumatoid arthritis	1	Number	1995	66.2234	81.8207	55.8704
1	Deaths	1	Global	3	Both	8	15-19 years	627	Rheumatoid arthritis	2	Percent	1995	9.80789e-05	0.000120561	8.28768e-05
1	Deaths	1	Global	3	Both	8	15-19 years	627	Rheumatoid arthritis	3	Rate	1995	0.0126478	0.0156267	0.0106705
1	Deaths	1	Global	3	Both	9	20-24 years	627	Rheumatoid arthritis	1	Number	1995	76.4762	97.0491	65.5832
1	Deaths	1	Global	3	Both	9	20-24 years	627	Rheumatoid arthritis	2	Percent	1995	8.79445e-05	0.000111079	7.46901e-05
1	Deaths	1	Global	3	Both	9	20-24 years	627	Rheumatoid arthritis	3	Rate	1995	0.0151604	0.0192388	0.013001
1	Deaths	1	Global	3	Both	10	25-29 years	627	Rheumatoid arthritis	1	Number	1995	101.771	133.033	88.4985
1	Deaths	1	Global	3	Both	10	25-29 years	627	Rheumatoid arthritis	2	Percent	1995	0.000108748	0.000140033	9.39911e-05
1	Deaths	1	Global	3	Both	10	25-29 years	627	Rheumatoid arthritis	3	Rate	1995	0.0209988	0.0274492	0.0182603
1	Deaths	1	Global	3	Both	11	30-34 years	627	Rheumatoid arthritis	1	Number	1995	146.975	176.563	128.191
1	Deaths	1	Global	3	Both	11	30-34 years	627	Rheumatoid arthritis	2	Percent	1995	0.000141342	0.000171605	0.000122625
1	Deaths	1	Global	3	Both	11	30-34 years	627	Rheumatoid arthritis	3	Rate	1995	0.0334227	0.0401511	0.0291511
1	Deaths	1	Global	3	Both	12	35-39 years	627	Rheumatoid arthritis	1	Number	1995	218.278	252.541	191.196
1	Deaths	1	Global	3	Both	12	35-39 years	627	Rheumatoid arthritis	2	Percent	1995	0.000186166	0.000216854	0.000162343
1	Deaths	1	Global	3	Both	12	35-39 years	627	Rheumatoid arthritis	3	Rate	1995	0.0575169	0.0665454	0.0503808
1	Deaths	1	Global	3	Both	13	40-44 years	627	Rheumatoid arthritis	1	Number	1995	350.79	405.288	310.131
1	Deaths	1	Global	3	Both	13	40-44 years	627	Rheumatoid arthritis	2	Percent	1995	0.000243438	0.000283199	0.00021601
1	Deaths	1	Global	3	Both	13	40-44 years	627	Rheumatoid arthritis	3	Rate	1995	0.102158	0.118029	0.0903176
1	Deaths	1	Global	3	Both	14	45-49 years	627	Rheumatoid arthritis	1	Number	1995	499.315	573.771	443.999
1	Deaths	1	Global	3	Both	14	45-49 years	627	Rheumatoid arthritis	2	Percent	1995	0.000319708	0.000366596	0.000283749
1	Deaths	1	Global	3	Both	14	45-49 years	627	Rheumatoid arthritis	3	Rate	1995	0.181179	0.208196	0.161107
1	Deaths	1	Global	3	Both	15	50-54 years	627	Rheumatoid arthritis	1	Number	1995	753.372	843.641	670.508
1	Deaths	1	Global	3	Both	15	50-54 years	627	Rheumatoid arthritis	2	Percent	1995	0.00039438	0.000441933	0.000352129
1	Deaths	1	Global	3	Both	15	50-54 years	627	Rheumatoid arthritis	3	Rate	1995	0.344371	0.385634	0.306493
1	Deaths	1	Global	3	Both	16	55-59 years	627	Rheumatoid arthritis	1	Number	1995	1313.12	1476.95	1172.05
1	Deaths	1	Global	3	Both	16	55-59 years	627	Rheumatoid arthritis	2	Percent	1995	0.000507333	0.00056634	0.00045335
1	Deaths	1	Global	3	Both	16	55-59 years	627	Rheumatoid arthritis	3	Rate	1995	0.658052	0.740154	0.58736
1	Deaths	1	Global	3	Both	17	60-64 years	627	Rheumatoid arthritis	1	Number	1995	2225.67	2561.55	1958.31
1	Deaths	1	Global	3	Both	17	60-64 years	627	Rheumatoid arthritis	2	Percent	1995	0.000666903	0.000764605	0.00058978
1	Deaths	1	Global	3	Both	17	60-64 years	627	Rheumatoid arthritis	3	Rate	1995	1.29557	1.49109	1.13994
1	Deaths	1	Global	3	Both	18	65-69 years	627	Rheumatoid arthritis	1	Number	1995	3193.84	3660.88	2820.76
1	Deaths	1	Global	3	Both	18	65-69 years	627	Rheumatoid arthritis	2	Percent	1995	0.000782702	0.000895569	0.000692869
1	Deaths	1	Global	3	Both	18	65-69 years	627	Rheumatoid arthritis	3	Rate	1995	2.24905	2.57793	1.98633
1	Deaths	1	Global	3	Both	19	70-74 years	627	Rheumatoid arthritis	1	Number	1995	3873.08	4412.45	3418.43
1	Deaths	1	Global	3	Both	19	70-74 years	627	Rheumatoid arthritis	2	Percent	1995	0.000854285	0.000975253	0.00075097
1	Deaths	1	Global	3	Both	19	70-74 years	627	Rheumatoid arthritis	3	Rate	1995	3.77149	4.29672	3.32877
1	Deaths	1	Global	3	Both	20	75-79 years	627	Rheumatoid arthritis	1	Number	1995	3754.44	4229.93	3275.1
1	Deaths	1	Global	3	Both	20	75-79 years	627	Rheumatoid arthritis	2	Percent	1995	0.000881294	0.000989915	0.000772404
1	Deaths	1	Global	3	Both	20	75-79 years	627	Rheumatoid arthritis	3	Rate	1995	5.88412	6.62934	5.13288
1	Deaths	1	Global	3	Both	30	80-84 years	627	Rheumatoid arthritis	1	Number	1995	3055.42	3527.51	2582.81
1	Deaths	1	Global	3	Both	30	80-84 years	627	Rheumatoid arthritis	2	Percent	1995	0.000728547	0.000836444	0.000616596
1	Deaths	1	Global	3	Both	30	80-84 years	627	Rheumatoid arthritis	3	Rate	1995	7.62324	8.80111	6.4441
1	Deaths	1	Global	3	Both	31	85-89 years	627	Rheumatoid arthritis	1	Number	1995	2032.54	2373.09	1685.98
1	Deaths	1	Global	3	Both	31	85-89 years	627	Rheumatoid arthritis	2	Percent	1995	0.000681179	0.000793432	0.000563723
1	Deaths	1	Global	3	Both	31	85-89 years	627	Rheumatoid arthritis	3	Rate	1995	11.0326	12.8811	9.15145
1	Deaths	1	Global	3	Both	32	90-94 years	627	Rheumatoid arthritis	1	Number	1995	761.313	901.597	607.54
1	Deaths	1	Global	3	Both	32	90-94 years	627	Rheumatoid arthritis	2	Percent	1995	0.000550729	0.000654517	0.000438541
1	Deaths	1	Global	3	Both	32	90-94 years	627	Rheumatoid arthritis	3	Rate	1995	13.1544	15.5783	10.4974
1	Deaths	1	Global	3	Both	235	95+ years	627	Rheumatoid arthritis	1	Number	1995	196.273	229.44	151.053
1	Deaths	1	Global	3	Both	235	95+ years	627	Rheumatoid arthritis	2	Percent	1995	0.0004691	0.000548675	0.000361177
1	Deaths	1	Global	3	Both	235	95+ years	627	Rheumatoid arthritis	3	Rate	1995	15.3307	17.9213	11.7986
1	Deaths	1	Global	3	Both	6	5-9 years	627	Rheumatoid arthritis	1	Number	1991	46.5921	59.207	39.2744
1	Deaths	1	Global	3	Both	6	5-9 years	627	Rheumatoid arthritis	2	Percent	1991	5.72066e-05	7.25464e-05	4.8046e-05
1	Deaths	1	Global	3	Both	6	5-9 years	627	Rheumatoid arthritis	3	Rate	1991	0.00785839	0.00998607	0.00662416
1	Deaths	1	Global	3	Both	7	10-14 years	627	Rheumatoid arthritis	1	Number	1991	55.5888	69.5348	46.1816
1	Deaths	1	Global	3	Both	7	10-14 years	627	Rheumatoid arthritis	2	Percent	1991	0.000118698	0.000148456	9.98572e-05
1	Deaths	1	Global	3	Both	7	10-14 years	627	Rheumatoid arthritis	3	Rate	1991	0.0102555	0.0128284	0.00852001
1	Deaths	1	Global	3	Both	8	15-19 years	627	Rheumatoid arthritis	1	Number	1991	82.2092	100.12	68.4295
1	Deaths	1	Global	3	Both	8	15-19 years	627	Rheumatoid arthritis	2	Percent	1991	0.000117941	0.000145261	9.78711e-05
1	Deaths	1	Global	3	Both	8	15-19 years	627	Rheumatoid arthritis	3	Rate	1991	0.0158598	0.0193152	0.0132014
1	Deaths	1	Global	3	Both	9	20-24 years	627	Rheumatoid arthritis	1	Number	1991	96.1809	115.782	79.4194
1	Deaths	1	Global	3	Both	9	20-24 years	627	Rheumatoid arthritis	2	Percent	1991	0.00011395	0.000137599	9.40138e-05
1	Deaths	1	Global	3	Both	9	20-24 years	627	Rheumatoid arthritis	3	Rate	1991	0.0193515	0.0232951	0.0159791
1	Deaths	1	Global	3	Both	10	25-29 years	627	Rheumatoid arthritis	1	Number	1991	121.404	146.1	103.019
1	Deaths	1	Global	3	Both	10	25-29 years	627	Rheumatoid arthritis	2	Percent	1991	0.000141465	0.000168181	0.000120298
1	Deaths	1	Global	3	Both	10	25-29 years	627	Rheumatoid arthritis	3	Rate	1991	0.0266387	0.0320576	0.0226047
1	Deaths	1	Global	3	Both	11	30-34 years	627	Rheumatoid arthritis	1	Number	1991	157.72	186.553	135.642
1	Deaths	1	Global	3	Both	11	30-34 years	627	Rheumatoid arthritis	2	Percent	1991	0.000175416	0.000206884	0.000150622
1	Deaths	1	Global	3	Both	11	30-34 years	627	Rheumatoid arthritis	3	Rate	1991	0.040383	0.0477654	0.03473
1	Deaths	1	Global	3	Both	12	35-39 years	627	Rheumatoid arthritis	1	Number	1991	252.15	291.87	216.833
1	Deaths	1	Global	3	Both	12	35-39 years	627	Rheumatoid arthritis	2	Percent	1991	0.000237996	0.000276774	0.0002053
1	Deaths	1	Global	3	Both	12	35-39 years	627	Rheumatoid arthritis	3	Rate	1991	0.06983	0.0808299	0.0600493
1	Deaths	1	Global	3	Both	13	40-44 years	627	Rheumatoid arthritis	1	Number	1991	346.63	402.745	300.603
1	Deaths	1	Global	3	Both	13	40-44 years	627	Rheumatoid arthritis	2	Percent	1991	0.000287487	0.000330811	0.000250885
1	Deaths	1	Global	3	Both	13	40-44 years	627	Rheumatoid arthritis	3	Rate	1991	0.11534	0.134012	0.100024
1	Deaths	1	Global	3	Both	14	45-49 years	627	Rheumatoid arthritis	1	Number	1991	475.609	548.424	416.519
1	Deaths	1	Global	3	Both	14	45-49 years	627	Rheumatoid arthritis	2	Percent	1991	0.000356326	0.000406823	0.000313046
1	Deaths	1	Global	3	Both	14	45-49 years	627	Rheumatoid arthritis	3	Rate	1991	0.202053	0.232987	0.17695
1	Deaths	1	Global	3	Both	15	50-54 years	627	Rheumatoid arthritis	1	Number	1991	813.186	914.127	726.584
1	Deaths	1	Global	3	Both	15	50-54 years	627	Rheumatoid arthritis	2	Percent	1991	0.000429744	0.000482487	0.000384925
1	Deaths	1	Global	3	Both	15	50-54 years	627	Rheumatoid arthritis	3	Rate	1991	0.378436	0.425411	0.338133
1	Deaths	1	Global	3	Both	16	55-59 years	627	Rheumatoid arthritis	1	Number	1991	1321.84	1476.81	1165.28
1	Deaths	1	Global	3	Both	16	55-59 years	627	Rheumatoid arthritis	2	Percent	1991	0.000540515	0.000603683	0.000481451
1	Deaths	1	Global	3	Both	16	55-59 years	627	Rheumatoid arthritis	3	Rate	1991	0.703702	0.786204	0.620353
1	Deaths	1	Global	3	Both	17	60-64 years	627	Rheumatoid arthritis	1	Number	1991	2234.62	2533.74	1984.72
1	Deaths	1	Global	3	Both	17	60-64 years	627	Rheumatoid arthritis	2	Percent	1991	0.000695385	0.000785059	0.00062166
1	Deaths	1	Global	3	Both	17	60-64 years	627	Rheumatoid arthritis	3	Rate	1991	1.36328	1.54577	1.21082
1	Deaths	1	Global	3	Both	18	65-69 years	627	Rheumatoid arthritis	1	Number	1991	3060.87	3457.23	2698.8
1	Deaths	1	Global	3	Both	18	65-69 years	627	Rheumatoid arthritis	2	Percent	1991	0.000829985	0.000934839	0.000736929
1	Deaths	1	Global	3	Both	18	65-69 years	627	Rheumatoid arthritis	3	Rate	1991	2.40201	2.71306	2.11788
1	Deaths	1	Global	3	Both	19	70-74 years	627	Rheumatoid arthritis	1	Number	1991	3445.67	3884.34	2998.44
1	Deaths	1	Global	3	Both	19	70-74 years	627	Rheumatoid arthritis	2	Percent	1991	0.000873095	0.000997583	0.000759836
1	Deaths	1	Global	3	Both	19	70-74 years	627	Rheumatoid arthritis	3	Rate	1991	3.92761	4.42764	3.41783
1	Deaths	1	Global	3	Both	20	75-79 years	627	Rheumatoid arthritis	1	Number	1991	3823.47	4190.36	3374.01
1	Deaths	1	Global	3	Both	20	75-79 years	627	Rheumatoid arthritis	2	Percent	1991	0.000902807	0.00100073	0.000798955
1	Deaths	1	Global	3	Both	20	75-79 years	627	Rheumatoid arthritis	3	Rate	1991	6.18972	6.78365	5.46209
1	Deaths	1	Global	3	Both	30	80-84 years	627	Rheumatoid arthritis	1	Number	1991	2858.89	3232.85	2442.02
1	Deaths	1	Global	3	Both	30	80-84 years	627	Rheumatoid arthritis	2	Percent	1991	0.000746591	0.000847117	0.000636977
1	Deaths	1	Global	3	Both	30	80-84 years	627	Rheumatoid arthritis	3	Rate	1991	7.83441	8.8592	6.69203
1	Deaths	1	Global	3	Both	31	85-89 years	627	Rheumatoid arthritis	1	Number	1991	1887.1	2161.44	1579.2
1	Deaths	1	Global	3	Both	31	85-89 years	627	Rheumatoid arthritis	2	Percent	1991	0.000731779	0.000843963	0.000611457
1	Deaths	1	Global	3	Both	31	85-89 years	627	Rheumatoid arthritis	3	Rate	1991	11.9392	13.6749	9.99122
1	Deaths	1	Global	3	Both	32	90-94 years	627	Rheumatoid arthritis	1	Number	1991	656.432	755.598	524.342
1	Deaths	1	Global	3	Both	32	90-94 years	627	Rheumatoid arthritis	2	Percent	1991	0.000598608	0.000687998	0.000476863
1	Deaths	1	Global	3	Both	32	90-94 years	627	Rheumatoid arthritis	3	Rate	1991	14.3425	16.5092	11.4564
1	Deaths	1	Global	3	Both	235	95+ years	627	Rheumatoid arthritis	1	Number	1991	172.46	199.385	132.608
1	Deaths	1	Global	3	Both	235	95+ years	627	Rheumatoid arthritis	2	Percent	1991	0.000503154	0.000581823	0.000386023
1	Deaths	1	Global	3	Both	235	95+ years	627	Rheumatoid arthritis	3	Rate	1991	16.2737	18.8144	12.5132
1	Deaths	1	Global	3	Both	6	5-9 years	627	Rheumatoid arthritis	1	Number	2003	27.3664	34.2313	22.2913
1	Deaths	1	Global	3	Both	6	5-9 years	627	Rheumatoid arthritis	2	Percent	2003	4.47586e-05	5.63878e-05	3.62749e-05
1	Deaths	1	Global	3	Both	6	5-9 years	627	Rheumatoid arthritis	3	Rate	2003	0.00458418	0.00573411	0.00373404
1	Deaths	1	Global	3	Both	7	10-14 years	627	Rheumatoid arthritis	1	Number	2003	42.8741	52.107	34.1163
1	Deaths	1	Global	3	Both	7	10-14 years	627	Rheumatoid arthritis	2	Percent	2003	0.000101096	0.000124363	8.03675e-05
1	Deaths	1	Global	3	Both	7	10-14 years	627	Rheumatoid arthritis	3	Rate	2003	0.00692897	0.00842112	0.00551359
1	Deaths	1	Global	3	Both	8	15-19 years	627	Rheumatoid arthritis	1	Number	2003	69.0392	88.237	57.2221
1	Deaths	1	Global	3	Both	8	15-19 years	627	Rheumatoid arthritis	2	Percent	2003	9.8176e-05	0.000124741	8.19325e-05
1	Deaths	1	Global	3	Both	8	15-19 years	627	Rheumatoid arthritis	3	Rate	2003	0.0113798	0.0145442	0.00943198
1	Deaths	1	Global	3	Both	9	20-24 years	627	Rheumatoid arthritis	1	Number	2003	75.3295	94.9799	63.5789
1	Deaths	1	Global	3	Both	9	20-24 years	627	Rheumatoid arthritis	2	Percent	2003	8.63853e-05	0.000108025	7.32658e-05
1	Deaths	1	Global	3	Both	9	20-24 years	627	Rheumatoid arthritis	3	Rate	2003	0.0140864	0.017761	0.0118891
1	Deaths	1	Global	3	Both	10	25-29 years	627	Rheumatoid arthritis	1	Number	2003	109.13	131.476	91.3082
1	Deaths	1	Global	3	Both	10	25-29 years	627	Rheumatoid arthritis	2	Percent	2003	0.000109285	0.000131585	9.16719e-05
1	Deaths	1	Global	3	Both	10	25-29 years	627	Rheumatoid arthritis	3	Rate	2003	0.0218603	0.0263366	0.0182904
1	Deaths	1	Global	3	Both	11	30-34 years	627	Rheumatoid arthritis	1	Number	2003	174.481	206.417	148.23
1	Deaths	1	Global	3	Both	11	30-34 years	627	Rheumatoid arthritis	2	Percent	2003	0.000147503	0.000174065	0.000125222
1	Deaths	1	Global	3	Both	11	30-34 years	627	Rheumatoid arthritis	3	Rate	2003	0.0354399	0.0419266	0.0301078
1	Deaths	1	Global	3	Both	12	35-39 years	627	Rheumatoid arthritis	1	Number	2003	277.447	325.059	225.676
1	Deaths	1	Global	3	Both	12	35-39 years	627	Rheumatoid arthritis	2	Percent	2003	0.000198305	0.000233976	0.000161676
1	Deaths	1	Global	3	Both	12	35-39 years	627	Rheumatoid arthritis	3	Rate	2003	0.0597528	0.0700069	0.048603
1	Deaths	1	Global	3	Both	13	40-44 years	627	Rheumatoid arthritis	1	Number	2003	374.29	433.09	318.572
1	Deaths	1	Global	3	Both	13	40-44 years	627	Rheumatoid arthritis	2	Percent	2003	0.000235331	0.000271463	0.000200864
1	Deaths	1	Global	3	Both	13	40-44 years	627	Rheumatoid arthritis	3	Rate	2003	0.0949704	0.10989	0.0808326
1	Deaths	1	Global	3	Both	14	45-49 years	627	Rheumatoid arthritis	1	Number	2003	619.593	710.063	526.434
1	Deaths	1	Global	3	Both	14	45-49 years	627	Rheumatoid arthritis	2	Percent	2003	0.000328288	0.000374858	0.00027844
1	Deaths	1	Global	3	Both	14	45-49 years	627	Rheumatoid arthritis	3	Rate	2003	0.178132	0.204142	0.151349
1	Deaths	1	Global	3	Both	15	50-54 years	627	Rheumatoid arthritis	1	Number	2003	1009.1	1123.01	886.004
1	Deaths	1	Global	3	Both	15	50-54 years	627	Rheumatoid arthritis	2	Percent	2003	0.000435146	0.000481094	0.000382516
1	Deaths	1	Global	3	Both	15	50-54 years	627	Rheumatoid arthritis	3	Rate	2003	0.343439	0.382208	0.301544
1	Deaths	1	Global	3	Both	16	55-59 years	627	Rheumatoid arthritis	1	Number	2003	1363.24	1517.79	1186.09
1	Deaths	1	Global	3	Both	16	55-59 years	627	Rheumatoid arthritis	2	Percent	2003	0.000536512	0.000599075	0.000467711
1	Deaths	1	Global	3	Both	16	55-59 years	627	Rheumatoid arthritis	3	Rate	2003	0.604661	0.673209	0.526087
1	Deaths	1	Global	3	Both	17	60-64 years	627	Rheumatoid arthritis	1	Number	2003	2296.18	2652.07	1946.95
1	Deaths	1	Global	3	Both	17	60-64 years	627	Rheumatoid arthritis	2	Percent	2003	0.000694043	0.000795931	0.00058685
1	Deaths	1	Global	3	Both	17	60-64 years	627	Rheumatoid arthritis	3	Rate	2003	1.2014	1.38761	1.01868
1	Deaths	1	Global	3	Both	18	65-69 years	627	Rheumatoid arthritis	1	Number	2003	3535.62	4130.7	2984.84
1	Deaths	1	Global	3	Both	18	65-69 years	627	Rheumatoid arthritis	2	Percent	2003	0.000834387	0.000974929	0.000703033
1	Deaths	1	Global	3	Both	18	65-69 years	627	Rheumatoid arthritis	3	Rate	2003	2.18434	2.55199	1.84406
1	Deaths	1	Global	3	Both	19	70-74 years	627	Rheumatoid arthritis	1	Number	2003	4519.26	5222.11	3750.66
1	Deaths	1	Global	3	Both	19	70-74 years	627	Rheumatoid arthritis	2	Percent	2003	0.000880057	0.00101862	0.000733902
1	Deaths	1	Global	3	Both	19	70-74 years	627	Rheumatoid arthritis	3	Rate	2003	3.58929	4.1475	2.97885
1	Deaths	1	Global	3	Both	20	75-79 years	627	Rheumatoid arthritis	1	Number	2003	4906.23	5497.95	4174.77
1	Deaths	1	Global	3	Both	20	75-79 years	627	Rheumatoid arthritis	2	Percent	2003	0.000921841	0.00103822	0.000779635
1	Deaths	1	Global	3	Both	20	75-79 years	627	Rheumatoid arthritis	3	Rate	2003	5.61681	6.29423	4.77941
1	Deaths	1	Global	3	Both	30	80-84 years	627	Rheumatoid arthritis	1	Number	2003	3818.43	4373.81	3128.18
1	Deaths	1	Global	3	Both	30	80-84 years	627	Rheumatoid arthritis	2	Percent	2003	0.000823043	0.000935489	0.000669146
1	Deaths	1	Global	3	Both	30	80-84 years	627	Rheumatoid arthritis	3	Rate	2003	7.76316	8.89228	6.35982
1	Deaths	1	Global	3	Both	31	85-89 years	627	Rheumatoid arthritis	1	Number	2003	2591.42	2933.82	2105.08
1	Deaths	1	Global	3	Both	31	85-89 years	627	Rheumatoid arthritis	2	Percent	2003	0.000751068	0.000852876	0.000611206
1	Deaths	1	Global	3	Both	31	85-89 years	627	Rheumatoid arthritis	3	Rate	2003	11.7881	13.3456	9.5758
1	Deaths	1	Global	3	Both	32	90-94 years	627	Rheumatoid arthritis	1	Number	2003	1126.89	1293.35	895.451
1	Deaths	1	Global	3	Both	32	90-94 years	627	Rheumatoid arthritis	2	Percent	2003	0.000606218	0.000694296	0.000479842
1	Deaths	1	Global	3	Both	32	90-94 years	627	Rheumatoid arthritis	3	Rate	2003	13.7961	15.8341	10.9627
1	Deaths	1	Global	3	Both	235	95+ years	627	Rheumatoid arthritis	1	Number	2003	352.242	406.766	270.669
1	Deaths	1	Global	3	Both	235	95+ years	627	Rheumatoid arthritis	2	Percent	2003	0.000548829	0.000632984	0.000421145
1	Deaths	1	Global	3	Both	235	95+ years	627	Rheumatoid arthritis	3	Rate	2003	16.2946	18.8168	12.521
1	Deaths	1	Global	3	Both	6	5-9 years	627	Rheumatoid arthritis	1	Number	2000	29.7496	38.5672	24.7483
1	Deaths	1	Global	3	Both	6	5-9 years	627	Rheumatoid arthritis	2	Percent	2000	4.36013e-05	5.55518e-05	3.67445e-05
1	Deaths	1	Global	3	Both	6	5-9 years	627	Rheumatoid arthritis	3	Rate	2000	0.00494427	0.00640973	0.00411308
1	Deaths	1	Global	3	Both	7	10-14 years	627	Rheumatoid arthritis	1	Number	2000	44.5235	57.8253	36.7278
1	Deaths	1	Global	3	Both	7	10-14 years	627	Rheumatoid arthritis	2	Percent	2000	9.53842e-05	0.000125216	7.91536e-05
1	Deaths	1	Global	3	Both	7	10-14 years	627	Rheumatoid arthritis	3	Rate	2000	0.00713987	0.00927299	0.00588975
1	Deaths	1	Global	3	Both	8	15-19 years	627	Rheumatoid arthritis	1	Number	2000	64.2712	81.5509	53.15
1	Deaths	1	Global	3	Both	8	15-19 years	627	Rheumatoid arthritis	2	Percent	2000	8.78222e-05	0.000112067	7.33777e-05
1	Deaths	1	Global	3	Both	8	15-19 years	627	Rheumatoid arthritis	3	Rate	2000	0.0112995	0.0143374	0.00934428
1	Deaths	1	Global	3	Both	9	20-24 years	627	Rheumatoid arthritis	1	Number	2000	70.9649	90.988	61.438
1	Deaths	1	Global	3	Both	9	20-24 years	627	Rheumatoid arthritis	2	Percent	2000	7.85517e-05	0.000100215	6.75069e-05
1	Deaths	1	Global	3	Both	9	20-24 years	627	Rheumatoid arthritis	3	Rate	2000	0.0138868	0.017805	0.0120225
1	Deaths	1	Global	3	Both	10	25-29 years	627	Rheumatoid arthritis	1	Number	2000	99.1525	124.191	86.4272
1	Deaths	1	Global	3	Both	10	25-29 years	627	Rheumatoid arthritis	2	Percent	2000	9.73545e-05	0.000124564	8.37492e-05
1	Deaths	1	Global	3	Both	10	25-29 years	627	Rheumatoid arthritis	3	Rate	2000	0.0198803	0.0249006	0.0173289
1	Deaths	1	Global	3	Both	11	30-34 years	627	Rheumatoid arthritis	1	Number	2000	151.76	187.348	134.216
1	Deaths	1	Global	3	Both	11	30-34 years	627	Rheumatoid arthritis	2	Percent	2000	0.000131485	0.000163149	0.000113704
1	Deaths	1	Global	3	Both	11	30-34 years	627	Rheumatoid arthritis	3	Rate	2000	0.0316761	0.039104	0.0280142
1	Deaths	1	Global	3	Both	12	35-39 years	627	Rheumatoid arthritis	1	Number	2000	235.922	276.136	202.814
1	Deaths	1	Global	3	Both	12	35-39 years	627	Rheumatoid arthritis	2	Percent	2000	0.000176948	0.000207656	0.000152117
1	Deaths	1	Global	3	Both	12	35-39 years	627	Rheumatoid arthritis	3	Rate	2000	0.0543151	0.0635735	0.046693
1	Deaths	1	Global	3	Both	13	40-44 years	627	Rheumatoid arthritis	1	Number	2000	335.562	393.041	294.529
1	Deaths	1	Global	3	Both	13	40-44 years	627	Rheumatoid arthritis	2	Percent	2000	0.000223325	0.00026222	0.00019604
1	Deaths	1	Global	3	Both	13	40-44 years	627	Rheumatoid arthritis	3	Rate	2000	0.091227	0.106853	0.0800715
1	Deaths	1	Global	3	Both	14	45-49 years	627	Rheumatoid arthritis	1	Number	2000	565.906	652.262	497.965
1	Deaths	1	Global	3	Both	14	45-49 years	627	Rheumatoid arthritis	2	Percent	2000	0.000312695	0.000358988	0.00027537
1	Deaths	1	Global	3	Both	14	45-49 years	627	Rheumatoid arthritis	3	Rate	2000	0.172026	0.198276	0.151373
1	Deaths	1	Global	3	Both	15	50-54 years	627	Rheumatoid arthritis	1	Number	2000	857.983	954.12	767.288
1	Deaths	1	Global	3	Both	15	50-54 years	627	Rheumatoid arthritis	2	Percent	2000	0.000411611	0.000455641	0.000370016
1	Deaths	1	Global	3	Both	15	50-54 years	627	Rheumatoid arthritis	3	Rate	2000	0.328578	0.365394	0.293844
1	Deaths	1	Global	3	Both	16	55-59 years	627	Rheumatoid arthritis	1	Number	2000	1254.43	1408.98	1105.57
1	Deaths	1	Global	3	Both	16	55-59 years	627	Rheumatoid arthritis	2	Percent	2000	0.000511965	0.000575371	0.000454144
1	Deaths	1	Global	3	Both	16	55-59 years	627	Rheumatoid arthritis	3	Rate	2000	0.611774	0.68715	0.539178
1	Deaths	1	Global	3	Both	17	60-64 years	627	Rheumatoid arthritis	1	Number	2000	2200.38	2535.74	1924.07
1	Deaths	1	Global	3	Both	17	60-64 years	627	Rheumatoid arthritis	2	Percent	2000	0.000660413	0.000763595	0.000575979
1	Deaths	1	Global	3	Both	17	60-64 years	627	Rheumatoid arthritis	3	Rate	2000	1.1809	1.36088	1.03261
1	Deaths	1	Global	3	Both	18	65-69 years	627	Rheumatoid arthritis	1	Number	2000	3334.22	3913.28	2891.62
1	Deaths	1	Global	3	Both	18	65-69 years	627	Rheumatoid arthritis	2	Percent	2000	0.000806197	0.000941433	0.000693135
1	Deaths	1	Global	3	Both	18	65-69 years	627	Rheumatoid arthritis	3	Rate	2000	2.18557	2.56514	1.89544
1	Deaths	1	Global	3	Both	19	70-74 years	627	Rheumatoid arthritis	1	Number	2000	4108.73	4724.61	3549.3
1	Deaths	1	Global	3	Both	19	70-74 years	627	Rheumatoid arthritis	2	Percent	2000	0.000831489	0.000950795	0.000722888
1	Deaths	1	Global	3	Both	19	70-74 years	627	Rheumatoid arthritis	3	Rate	2000	3.4493	3.96633	2.97965
1	Deaths	1	Global	3	Both	20	75-79 years	627	Rheumatoid arthritis	1	Number	2000	4469.75	5006.72	3884.42
1	Deaths	1	Global	3	Both	20	75-79 years	627	Rheumatoid arthritis	2	Percent	2000	0.000911437	0.00101271	0.000793707
1	Deaths	1	Global	3	Both	20	75-79 years	627	Rheumatoid arthritis	3	Rate	2000	5.67368	6.35527	4.93069
1	Deaths	1	Global	3	Both	30	80-84 years	627	Rheumatoid arthritis	1	Number	2000	3196.4	3655.53	2643.36
1	Deaths	1	Global	3	Both	30	80-84 years	627	Rheumatoid arthritis	2	Percent	2000	0.000779986	0.000886937	0.000644933
1	Deaths	1	Global	3	Both	30	80-84 years	627	Rheumatoid arthritis	3	Rate	2000	7.53135	8.61316	6.22829
1	Deaths	1	Global	3	Both	31	85-89 years	627	Rheumatoid arthritis	1	Number	2000	2268.84	2548.92	1857.78
1	Deaths	1	Global	3	Both	31	85-89 years	627	Rheumatoid arthritis	2	Percent	2000	0.000680713	0.000762412	0.000557016
1	Deaths	1	Global	3	Both	31	85-89 years	627	Rheumatoid arthritis	3	Rate	2000	10.6052	11.9144	8.68381
1	Deaths	1	Global	3	Both	32	90-94 years	627	Rheumatoid arthritis	1	Number	2000	943.381	1079.91	745.672
1	Deaths	1	Global	3	Both	32	90-94 years	627	Rheumatoid arthritis	2	Percent	2000	0.000566179	0.000646027	0.00044738
1	Deaths	1	Global	3	Both	32	90-94 years	627	Rheumatoid arthritis	3	Rate	2000	12.9412	14.814	10.229
1	Deaths	1	Global	3	Both	235	95+ years	627	Rheumatoid arthritis	1	Number	2000	270.778	311.952	207.553
1	Deaths	1	Global	3	Both	235	95+ years	627	Rheumatoid arthritis	2	Percent	2000	0.000499752	0.000575889	0.000382765
1	Deaths	1	Global	3	Both	235	95+ years	627	Rheumatoid arthritis	3	Rate	2000	15.1862	17.4954	11.6403
1	Deaths	1	Global	3	Both	6	5-9 years	627	Rheumatoid arthritis	1	Number	1999	30.844	39.7562	25.9553
1	Deaths	1	Global	3	Both	6	5-9 years	627	Rheumatoid arthritis	2	Percent	1999	4.36038e-05	5.50505e-05	3.67945e-05
1	Deaths	1	Global	3	Both	6	5-9 years	627	Rheumatoid arthritis	3	Rate	1999	0.005091	0.00656199	0.00428408
1	Deaths	1	Global	3	Both	7	10-14 years	627	Rheumatoid arthritis	1	Number	1999	44.4248	58.8108	37.1661
1	Deaths	1	Global	3	Both	7	10-14 years	627	Rheumatoid arthritis	2	Percent	1999	9.48723e-05	0.000127374	7.94507e-05
1	Deaths	1	Global	3	Both	7	10-14 years	627	Rheumatoid arthritis	3	Rate	1999	0.00717524	0.00949879	0.00600285
1	Deaths	1	Global	3	Both	8	15-19 years	627	Rheumatoid arthritis	1	Number	1999	62.1165	78.6316	51.7005
1	Deaths	1	Global	3	Both	8	15-19 years	627	Rheumatoid arthritis	2	Percent	1999	8.48877e-05	0.000108594	6.86386e-05
1	Deaths	1	Global	3	Both	8	15-19 years	627	Rheumatoid arthritis	3	Rate	1999	0.0111495	0.0141139	0.00927991
1	Deaths	1	Global	3	Both	9	20-24 years	627	Rheumatoid arthritis	1	Number	1999	68.4582	89.1996	58.1848
1	Deaths	1	Global	3	Both	9	20-24 years	627	Rheumatoid arthritis	2	Percent	1999	7.55607e-05	9.89107e-05	6.30327e-05
1	Deaths	1	Global	3	Both	9	20-24 years	627	Rheumatoid arthritis	3	Rate	1999	0.0135247	0.0176224	0.011495
1	Deaths	1	Global	3	Both	10	25-29 years	627	Rheumatoid arthritis	1	Number	1999	94.5704	117.484	82.9018
1	Deaths	1	Global	3	Both	10	25-29 years	627	Rheumatoid arthritis	2	Percent	1999	9.40339e-05	0.000120592	8.06683e-05
1	Deaths	1	Global	3	Both	10	25-29 years	627	Rheumatoid arthritis	3	Rate	1999	0.0189987	0.0236021	0.0166546
1	Deaths	1	Global	3	Both	11	30-34 years	627	Rheumatoid arthritis	1	Number	1999	145.88	182.39	127.495
1	Deaths	1	Global	3	Both	11	30-34 years	627	Rheumatoid arthritis	2	Percent	1999	0.000128866	0.000160729	0.000111441
1	Deaths	1	Global	3	Both	11	30-34 years	627	Rheumatoid arthritis	3	Rate	1999	0.0307324	0.0384237	0.0268591
1	Deaths	1	Global	3	Both	12	35-39 years	627	Rheumatoid arthritis	1	Number	1999	220.625	260.856	191.48
1	Deaths	1	Global	3	Both	12	35-39 years	627	Rheumatoid arthritis	2	Percent	1999	0.000171185	0.000203655	0.000146985
1	Deaths	1	Global	3	Both	12	35-39 years	627	Rheumatoid arthritis	3	Rate	1999	0.0525203	0.0620973	0.0455821
1	Deaths	1	Global	3	Both	13	40-44 years	627	Rheumatoid arthritis	1	Number	1999	331.754	385.596	290.894
1	Deaths	1	Global	3	Both	13	40-44 years	627	Rheumatoid arthritis	2	Percent	1999	0.000222408	0.000258932	0.000193676
1	Deaths	1	Global	3	Both	13	40-44 years	627	Rheumatoid arthritis	3	Rate	1999	0.0909464	0.105707	0.0797451
1	Deaths	1	Global	3	Both	14	45-49 years	627	Rheumatoid arthritis	1	Number	1999	530.263	619.89	467.713
1	Deaths	1	Global	3	Both	14	45-49 years	627	Rheumatoid arthritis	2	Percent	1999	0.000304825	0.000353942	0.000268106
1	Deaths	1	Global	3	Both	14	45-49 years	627	Rheumatoid arthritis	3	Rate	1999	0.167333	0.195617	0.147595
1	Deaths	1	Global	3	Both	15	50-54 years	627	Rheumatoid arthritis	1	Number	1999	794.223	892.706	712.688
1	Deaths	1	Global	3	Both	15	50-54 years	627	Rheumatoid arthritis	2	Percent	1999	0.000395292	0.000443329	0.000354345
1	Deaths	1	Global	3	Both	15	50-54 years	627	Rheumatoid arthritis	3	Rate	1999	0.3167	0.35597	0.284188
1	Deaths	1	Global	3	Both	16	55-59 years	627	Rheumatoid arthritis	1	Number	1999	1246.64	1391.39	1111.95
1	Deaths	1	Global	3	Both	16	55-59 years	627	Rheumatoid arthritis	2	Percent	1999	0.000504808	0.00056643	0.000447148
1	Deaths	1	Global	3	Both	16	55-59 years	627	Rheumatoid arthritis	3	Rate	1999	0.610606	0.681504	0.544634
1	Deaths	1	Global	3	Both	17	60-64 years	627	Rheumatoid arthritis	1	Number	1999	2174.76	2507.52	1896.99
1	Deaths	1	Global	3	Both	17	60-64 years	627	Rheumatoid arthritis	2	Percent	1999	0.000654856	0.00076299	0.000575943
1	Deaths	1	Global	3	Both	17	60-64 years	627	Rheumatoid arthritis	3	Rate	1999	1.18466	1.36592	1.03334
1	Deaths	1	Global	3	Both	18	65-69 years	627	Rheumatoid arthritis	1	Number	1999	3260.43	3838.04	2821.02
1	Deaths	1	Global	3	Both	18	65-69 years	627	Rheumatoid arthritis	2	Percent	1999	0.000790649	0.000927052	0.000686157
1	Deaths	1	Global	3	Both	18	65-69 years	627	Rheumatoid arthritis	3	Rate	1999	2.16634	2.55013	1.87439
1	Deaths	1	Global	3	Both	19	70-74 years	627	Rheumatoid arthritis	1	Number	1999	4054.81	4699.01	3523.35
1	Deaths	1	Global	3	Both	19	70-74 years	627	Rheumatoid arthritis	2	Percent	1999	0.000830195	0.000955635	0.000722373
1	Deaths	1	Global	3	Both	19	70-74 years	627	Rheumatoid arthritis	3	Rate	1999	3.4915	4.04621	3.03388
1	Deaths	1	Global	3	Both	20	75-79 years	627	Rheumatoid arthritis	1	Number	1999	4270.11	4762.55	3752.21
1	Deaths	1	Global	3	Both	20	75-79 years	627	Rheumatoid arthritis	2	Percent	1999	0.000896713	0.000994261	0.000782184
1	Deaths	1	Global	3	Both	20	75-79 years	627	Rheumatoid arthritis	3	Rate	1999	5.6315	6.28095	4.94849
1	Deaths	1	Global	3	Both	30	80-84 years	627	Rheumatoid arthritis	1	Number	1999	3086.31	3525.54	2549.88
1	Deaths	1	Global	3	Both	30	80-84 years	627	Rheumatoid arthritis	2	Percent	1999	0.000760617	0.000866871	0.000628362
1	Deaths	1	Global	3	Both	30	80-84 years	627	Rheumatoid arthritis	3	Rate	1999	7.52	8.59022	6.21294
1	Deaths	1	Global	3	Both	31	85-89 years	627	Rheumatoid arthritis	1	Number	1999	2167.96	2454.34	1779.8
1	Deaths	1	Global	3	Both	31	85-89 years	627	Rheumatoid arthritis	2	Percent	1999	0.000666575	0.000753293	0.000545623
1	Deaths	1	Global	3	Both	31	85-89 years	627	Rheumatoid arthritis	3	Rate	1999	10.3658	11.735	8.50982
1	Deaths	1	Global	3	Both	32	90-94 years	627	Rheumatoid arthritis	1	Number	1999	891.8	1020.14	709.133
1	Deaths	1	Global	3	Both	32	90-94 years	627	Rheumatoid arthritis	2	Percent	1999	0.00055239	0.000631317	0.000437483
1	Deaths	1	Global	3	Both	32	90-94 years	627	Rheumatoid arthritis	3	Rate	1999	12.7323	14.5647	10.1243
1	Deaths	1	Global	3	Both	235	95+ years	627	Rheumatoid arthritis	1	Number	1999	255.017	293.279	196.206
1	Deaths	1	Global	3	Both	235	95+ years	627	Rheumatoid arthritis	2	Percent	1999	0.000492752	0.000566951	0.00037945
1	Deaths	1	Global	3	Both	235	95+ years	627	Rheumatoid arthritis	3	Rate	1999	15.339	17.6405	11.8016
1	Deaths	1	Global	3	Both	6	5-9 years	627	Rheumatoid arthritis	1	Number	2004	26.4533	33.3847	21.4902
1	Deaths	1	Global	3	Both	6	5-9 years	627	Rheumatoid arthritis	2	Percent	2004	4.22161e-05	5.30158e-05	3.39744e-05
1	Deaths	1	Global	3	Both	6	5-9 years	627	Rheumatoid arthritis	3	Rate	2004	0.00443131	0.00559242	0.00359991
1	Deaths	1	Global	3	Both	7	10-14 years	627	Rheumatoid arthritis	1	Number	2004	41.0318	50.0153	32.5556
1	Deaths	1	Global	3	Both	7	10-14 years	627	Rheumatoid arthritis	2	Percent	2004	9.35187e-05	0.000114041	7.43327e-05
1	Deaths	1	Global	3	Both	7	10-14 years	627	Rheumatoid arthritis	3	Rate	2004	0.00667909	0.0081414	0.00529934
1	Deaths	1	Global	3	Both	8	15-19 years	627	Rheumatoid arthritis	1	Number	2004	69.852	87.9202	57.2369
1	Deaths	1	Global	3	Both	8	15-19 years	627	Rheumatoid arthritis	2	Percent	2004	9.6366e-05	0.000120548	7.9718e-05
1	Deaths	1	Global	3	Both	8	15-19 years	627	Rheumatoid arthritis	3	Rate	2004	0.0113418	0.0142755	0.00929347
1	Deaths	1	Global	3	Both	9	20-24 years	627	Rheumatoid arthritis	1	Number	2004	75.687	95.821	63.9047
1	Deaths	1	Global	3	Both	9	20-24 years	627	Rheumatoid arthritis	2	Percent	2004	8.5158e-05	0.000106305	7.2202e-05
1	Deaths	1	Global	3	Both	9	20-24 years	627	Rheumatoid arthritis	3	Rate	2004	0.0138731	0.0175635	0.0117134
1	Deaths	1	Global	3	Both	10	25-29 years	627	Rheumatoid arthritis	1	Number	2004	106.346	126.82	89.5058
1	Deaths	1	Global	3	Both	10	25-29 years	627	Rheumatoid arthritis	2	Percent	2004	0.000106033	0.000127942	8.89606e-05
1	Deaths	1	Global	3	Both	10	25-29 years	627	Rheumatoid arthritis	3	Rate	2004	0.021184	0.0252623	0.0178294
1	Deaths	1	Global	3	Both	11	30-34 years	627	Rheumatoid arthritis	1	Number	2004	172.655	203.937	149.002
1	Deaths	1	Global	3	Both	11	30-34 years	627	Rheumatoid arthritis	2	Percent	2004	0.000143895	0.000170638	0.00012352
1	Deaths	1	Global	3	Both	11	30-34 years	627	Rheumatoid arthritis	3	Rate	2004	0.0348608	0.0411771	0.0300851
1	Deaths	1	Global	3	Both	12	35-39 years	627	Rheumatoid arthritis	1	Number	2004	277.538	325.386	226.183
1	Deaths	1	Global	3	Both	12	35-39 years	627	Rheumatoid arthritis	2	Percent	2004	0.000198207	0.000237089	0.000163924
1	Deaths	1	Global	3	Both	12	35-39 years	627	Rheumatoid arthritis	3	Rate	2004	0.0590564	0.0692378	0.0481286
1	Deaths	1	Global	3	Both	13	40-44 years	627	Rheumatoid arthritis	1	Number	2004	390.65	447.653	335.101
1	Deaths	1	Global	3	Both	13	40-44 years	627	Rheumatoid arthritis	2	Percent	2004	0.00024035	0.000275486	0.00020541
1	Deaths	1	Global	3	Both	13	40-44 years	627	Rheumatoid arthritis	3	Rate	2004	0.0955951	0.109544	0.0820019
1	Deaths	1	Global	3	Both	14	45-49 years	627	Rheumatoid arthritis	1	Number	2004	617.223	702.632	527.238
1	Deaths	1	Global	3	Both	14	45-49 years	627	Rheumatoid arthritis	2	Percent	2004	0.000325354	0.000369337	0.000276487
1	Deaths	1	Global	3	Both	14	45-49 years	627	Rheumatoid arthritis	3	Rate	2004	0.175762	0.200083	0.150137
1	Deaths	1	Global	3	Both	15	50-54 years	627	Rheumatoid arthritis	1	Number	2004	1031.59	1144.93	900.982
1	Deaths	1	Global	3	Both	15	50-54 years	627	Rheumatoid arthritis	2	Percent	2004	0.000437426	0.000481846	0.000382117
1	Deaths	1	Global	3	Both	15	50-54 years	627	Rheumatoid arthritis	3	Rate	2004	0.341173	0.378656	0.297977
1	Deaths	1	Global	3	Both	16	55-59 years	627	Rheumatoid arthritis	1	Number	2004	1437.42	1601.75	1247.78
1	Deaths	1	Global	3	Both	16	55-59 years	627	Rheumatoid arthritis	2	Percent	2004	0.000546118	0.000605699	0.000474608
1	Deaths	1	Global	3	Both	16	55-59 years	627	Rheumatoid arthritis	3	Rate	2004	0.603672	0.672685	0.524028
1	Deaths	1	Global	3	Both	17	60-64 years	627	Rheumatoid arthritis	1	Number	2004	2286.91	2648.5	1934.05
1	Deaths	1	Global	3	Both	17	60-64 years	627	Rheumatoid arthritis	2	Percent	2004	0.000701688	0.000809114	0.000596597
1	Deaths	1	Global	3	Both	17	60-64 years	627	Rheumatoid arthritis	3	Rate	2004	1.1868	1.37445	1.00368
1	Deaths	1	Global	3	Both	18	65-69 years	627	Rheumatoid arthritis	1	Number	2004	3517.72	4150.22	2930.17
1	Deaths	1	Global	3	Both	18	65-69 years	627	Rheumatoid arthritis	2	Percent	2004	0.000832126	0.000975078	0.000704703
1	Deaths	1	Global	3	Both	18	65-69 years	627	Rheumatoid arthritis	3	Rate	2004	2.13333	2.51691	1.77701
1	Deaths	1	Global	3	Both	19	70-74 years	627	Rheumatoid arthritis	1	Number	2004	4564.63	5391.54	3735.95
1	Deaths	1	Global	3	Both	19	70-74 years	627	Rheumatoid arthritis	2	Percent	2004	0.000889361	0.00104362	0.000732347
1	Deaths	1	Global	3	Both	19	70-74 years	627	Rheumatoid arthritis	3	Rate	2004	3.57203	4.21912	2.92355
1	Deaths	1	Global	3	Both	20	75-79 years	627	Rheumatoid arthritis	1	Number	2004	4985.46	5666.49	4213.6
1	Deaths	1	Global	3	Both	20	75-79 years	627	Rheumatoid arthritis	2	Percent	2004	0.000917584	0.00103874	0.000779626
1	Deaths	1	Global	3	Both	20	75-79 years	627	Rheumatoid arthritis	3	Rate	2004	5.52501	6.27974	4.66962
1	Deaths	1	Global	3	Both	30	80-84 years	627	Rheumatoid arthritis	1	Number	2004	3957.49	4553.57	3227.03
1	Deaths	1	Global	3	Both	30	80-84 years	627	Rheumatoid arthritis	2	Percent	2004	0.000819899	0.000943962	0.000667994
1	Deaths	1	Global	3	Both	30	80-84 years	627	Rheumatoid arthritis	3	Rate	2004	7.68113	8.83807	6.26337
1	Deaths	1	Global	3	Both	31	85-89 years	627	Rheumatoid arthritis	1	Number	2004	2624.57	3050.02	2107.95
1	Deaths	1	Global	3	Both	31	85-89 years	627	Rheumatoid arthritis	2	Percent	2004	0.000757016	0.00087662	0.000608415
1	Deaths	1	Global	3	Both	31	85-89 years	627	Rheumatoid arthritis	3	Rate	2004	11.6993	13.5958	9.39641
1	Deaths	1	Global	3	Both	32	90-94 years	627	Rheumatoid arthritis	1	Number	2004	1154.84	1337.51	908.657
1	Deaths	1	Global	3	Both	32	90-94 years	627	Rheumatoid arthritis	2	Percent	2004	0.000612191	0.000710405	0.000482748
1	Deaths	1	Global	3	Both	32	90-94 years	627	Rheumatoid arthritis	3	Rate	2004	13.6607	15.8215	10.7486
1	Deaths	1	Global	3	Both	235	95+ years	627	Rheumatoid arthritis	1	Number	2004	360.194	420.621	273.614
1	Deaths	1	Global	3	Both	235	95+ years	627	Rheumatoid arthritis	2	Percent	2004	0.000542592	0.000631613	0.000412715
1	Deaths	1	Global	3	Both	235	95+ years	627	Rheumatoid arthritis	3	Rate	2004	15.7599	18.4038	11.9717
1	Deaths	1	Global	3	Both	6	5-9 years	627	Rheumatoid arthritis	1	Number	2006	24.3912	30.5736	19.7397
1	Deaths	1	Global	3	Both	6	5-9 years	627	Rheumatoid arthritis	2	Percent	2006	4.1535e-05	5.21273e-05	3.32866e-05
1	Deaths	1	Global	3	Both	6	5-9 years	627	Rheumatoid arthritis	3	Rate	2006	0.00407162	0.00510366	0.00329514
1	Deaths	1	Global	3	Both	7	10-14 years	627	Rheumatoid arthritis	1	Number	2006	37.6252	47.113	30.1437
1	Deaths	1	Global	3	Both	7	10-14 years	627	Rheumatoid arthritis	2	Percent	2006	9.25636e-05	0.000115282	7.45213e-05
1	Deaths	1	Global	3	Both	7	10-14 years	627	Rheumatoid arthritis	3	Rate	2006	0.00620089	0.00776455	0.00496789
1	Deaths	1	Global	3	Both	8	15-19 years	627	Rheumatoid arthritis	1	Number	2006	65.1405	81.007	52.6035
1	Deaths	1	Global	3	Both	8	15-19 years	627	Rheumatoid arthritis	2	Percent	2006	9.45584e-05	0.000117026	7.65867e-05
1	Deaths	1	Global	3	Both	8	15-19 years	627	Rheumatoid arthritis	3	Rate	2006	0.0104465	0.012991	0.00843594
1	Deaths	1	Global	3	Both	9	20-24 years	627	Rheumatoid arthritis	1	Number	2006	75.0414	94.5474	61.7648
1	Deaths	1	Global	3	Both	9	20-24 years	627	Rheumatoid arthritis	2	Percent	2006	8.58441e-05	0.0001072	7.14848e-05
1	Deaths	1	Global	3	Both	9	20-24 years	627	Rheumatoid arthritis	3	Rate	2006	0.0131315	0.0165448	0.0108082
1	Deaths	1	Global	3	Both	10	25-29 years	627	Rheumatoid arthritis	1	Number	2006	95.9756	114.137	81.1254
1	Deaths	1	Global	3	Both	10	25-29 years	627	Rheumatoid arthritis	2	Percent	2006	0.000100317	0.000120956	8.49019e-05
1	Deaths	1	Global	3	Both	10	25-29 years	627	Rheumatoid arthritis	3	Rate	2006	0.0186817	0.0222168	0.0157911
1	Deaths	1	Global	3	Both	11	30-34 years	627	Rheumatoid arthritis	1	Number	2006	157.414	186.846	134.521
1	Deaths	1	Global	3	Both	11	30-34 years	627	Rheumatoid arthritis	2	Percent	2006	0.000139037	0.000163735	0.000117331
1	Deaths	1	Global	3	Both	11	30-34 years	627	Rheumatoid arthritis	3	Rate	2006	0.0316202	0.0375322	0.0270217
1	Deaths	1	Global	3	Both	12	35-39 years	627	Rheumatoid arthritis	1	Number	2006	263.941	309.452	217.436
1	Deaths	1	Global	3	Both	12	35-39 years	627	Rheumatoid arthritis	2	Percent	2006	0.000193116	0.000228978	0.000162391
1	Deaths	1	Global	3	Both	12	35-39 years	627	Rheumatoid arthritis	3	Rate	2006	0.0549582	0.0644344	0.0452747
1	Deaths	1	Global	3	Both	13	40-44 years	627	Rheumatoid arthritis	1	Number	2006	421.145	484.448	352.548
1	Deaths	1	Global	3	Both	13	40-44 years	627	Rheumatoid arthritis	2	Percent	2006	0.000256031	0.000296141	0.000214669
1	Deaths	1	Global	3	Both	13	40-44 years	627	Rheumatoid arthritis	3	Rate	2006	0.096707	0.111243	0.0809552
1	Deaths	1	Global	3	Both	14	45-49 years	627	Rheumatoid arthritis	1	Number	2006	581.53	667.785	496.259
1	Deaths	1	Global	3	Both	14	45-49 years	627	Rheumatoid arthritis	2	Percent	2006	0.000314987	0.000359928	0.000267725
1	Deaths	1	Global	3	Both	14	45-49 years	627	Rheumatoid arthritis	3	Rate	2006	0.161486	0.185438	0.137807
1	Deaths	1	Global	3	Both	15	50-54 years	627	Rheumatoid arthritis	1	Number	2006	1059.21	1175.65	899.245
1	Deaths	1	Global	3	Both	15	50-54 years	627	Rheumatoid arthritis	2	Percent	2006	0.000441415	0.000487869	0.00038065
1	Deaths	1	Global	3	Both	15	50-54 years	627	Rheumatoid arthritis	3	Rate	2006	0.328386	0.364485	0.278793
1	Deaths	1	Global	3	Both	16	55-59 years	627	Rheumatoid arthritis	1	Number	2006	1542.17	1706.41	1331.24
1	Deaths	1	Global	3	Both	16	55-59 years	627	Rheumatoid arthritis	2	Percent	2006	0.000554458	0.000617823	0.00048305
1	Deaths	1	Global	3	Both	16	55-59 years	627	Rheumatoid arthritis	3	Rate	2006	0.589567	0.652357	0.50893
1	Deaths	1	Global	3	Both	17	60-64 years	627	Rheumatoid arthritis	1	Number	2006	2263.62	2622.74	1856.38
1	Deaths	1	Global	3	Both	17	60-64 years	627	Rheumatoid arthritis	2	Percent	2006	0.000716892	0.000825328	0.000591969
1	Deaths	1	Global	3	Both	17	60-64 years	627	Rheumatoid arthritis	3	Rate	2006	1.14356	1.32499	0.937825
1	Deaths	1	Global	3	Both	18	65-69 years	627	Rheumatoid arthritis	1	Number	2006	3478.27	4118.8	2892.35
1	Deaths	1	Global	3	Both	18	65-69 years	627	Rheumatoid arthritis	2	Percent	2006	0.000841921	0.000993434	0.000701332
1	Deaths	1	Global	3	Both	18	65-69 years	627	Rheumatoid arthritis	3	Rate	2006	2.04319	2.41945	1.69901
1	Deaths	1	Global	3	Both	19	70-74 years	627	Rheumatoid arthritis	1	Number	2006	4552.53	5406.25	3699.05
1	Deaths	1	Global	3	Both	19	70-74 years	627	Rheumatoid arthritis	2	Percent	2006	0.000908783	0.00107412	0.000736498
1	Deaths	1	Global	3	Both	19	70-74 years	627	Rheumatoid arthritis	3	Rate	2006	3.42667	4.06926	2.78426
1	Deaths	1	Global	3	Both	20	75-79 years	627	Rheumatoid arthritis	1	Number	2006	5096.79	5778.26	4278.08
1	Deaths	1	Global	3	Both	20	75-79 years	627	Rheumatoid arthritis	2	Percent	2006	0.000926354	0.00104988	0.000773015
1	Deaths	1	Global	3	Both	20	75-79 years	627	Rheumatoid arthritis	3	Rate	2006	5.34354	6.05801	4.48519
1	Deaths	1	Global	3	Both	30	80-84 years	627	Rheumatoid arthritis	1	Number	2006	4095.86	4703.17	3279.77
1	Deaths	1	Global	3	Both	30	80-84 years	627	Rheumatoid arthritis	2	Percent	2006	0.00081803	0.000938294	0.000655685
1	Deaths	1	Global	3	Both	30	80-84 years	627	Rheumatoid arthritis	3	Rate	2006	7.32887	8.41555	5.8686
1	Deaths	1	Global	3	Both	31	85-89 years	627	Rheumatoid arthritis	1	Number	2006	2769.22	3183.45	2190.8
1	Deaths	1	Global	3	Both	31	85-89 years	627	Rheumatoid arthritis	2	Percent	2006	0.000777246	0.000894156	0.000615547
1	Deaths	1	Global	3	Both	31	85-89 years	627	Rheumatoid arthritis	3	Rate	2006	11.1881	12.8616	8.85116
1	Deaths	1	Global	3	Both	32	90-94 years	627	Rheumatoid arthritis	1	Number	2006	1203.13	1411.22	930.703
1	Deaths	1	Global	3	Both	32	90-94 years	627	Rheumatoid arthritis	2	Percent	2006	0.000624963	0.000729829	0.00048677
1	Deaths	1	Global	3	Both	32	90-94 years	627	Rheumatoid arthritis	3	Rate	2006	13.5219	15.8606	10.4601
1	Deaths	1	Global	3	Both	235	95+ years	627	Rheumatoid arthritis	1	Number	2006	393.527	459.058	298.137
1	Deaths	1	Global	3	Both	235	95+ years	627	Rheumatoid arthritis	2	Percent	2006	0.000543391	0.000634286	0.000412907
1	Deaths	1	Global	3	Both	235	95+ years	627	Rheumatoid arthritis	3	Rate	2006	15.4651	18.0404	11.7164
1	Deaths	1	Global	3	Both	6	5-9 years	627	Rheumatoid arthritis	1	Number	2001	29.2623	37.4744	23.9435
1	Deaths	1	Global	3	Both	6	5-9 years	627	Rheumatoid arthritis	2	Percent	2001	4.37571e-05	5.51834e-05	3.6482e-05
1	Deaths	1	Global	3	Both	6	5-9 years	627	Rheumatoid arthritis	3	Rate	2001	0.00488554	0.00625661	0.00399753
1	Deaths	1	Global	3	Both	7	10-14 years	627	Rheumatoid arthritis	1	Number	2001	44.4168	57.9448	36.4487
1	Deaths	1	Global	3	Both	7	10-14 years	627	Rheumatoid arthritis	2	Percent	2001	9.65702e-05	0.000126477	7.90731e-05
1	Deaths	1	Global	3	Both	7	10-14 years	627	Rheumatoid arthritis	3	Rate	2001	0.00711456	0.00928143	0.00583824
1	Deaths	1	Global	3	Both	8	15-19 years	627	Rheumatoid arthritis	1	Number	2001	66.0888	83.6805	54.6578
1	Deaths	1	Global	3	Both	8	15-19 years	627	Rheumatoid arthritis	2	Percent	2001	9.41819e-05	0.000118937	7.85909e-05
1	Deaths	1	Global	3	Both	8	15-19 years	627	Rheumatoid arthritis	3	Rate	2001	0.0113585	0.0143819	0.00939386
1	Deaths	1	Global	3	Both	9	20-24 years	627	Rheumatoid arthritis	1	Number	2001	71.237	91.8185	61.4785
1	Deaths	1	Global	3	Both	9	20-24 years	627	Rheumatoid arthritis	2	Percent	2001	8.09102e-05	0.000103904	6.98741e-05
1	Deaths	1	Global	3	Both	9	20-24 years	627	Rheumatoid arthritis	3	Rate	2001	0.0137662	0.0177435	0.0118804
1	Deaths	1	Global	3	Both	10	25-29 years	627	Rheumatoid arthritis	1	Number	2001	102.013	128.533	87.8133
1	Deaths	1	Global	3	Both	10	25-29 years	627	Rheumatoid arthritis	2	Percent	2001	0.000100553	0.000125065	8.62037e-05
1	Deaths	1	Global	3	Both	10	25-29 years	627	Rheumatoid arthritis	3	Rate	2001	0.0204561	0.0257741	0.0176088
1	Deaths	1	Global	3	Both	11	30-34 years	627	Rheumatoid arthritis	1	Number	2001	156.854	192.184	137.651
1	Deaths	1	Global	3	Both	11	30-34 years	627	Rheumatoid arthritis	2	Percent	2001	0.000134967	0.000165742	0.000116244
1	Deaths	1	Global	3	Both	11	30-34 years	627	Rheumatoid arthritis	3	Rate	2001	0.0324046	0.0397036	0.0284374
1	Deaths	1	Global	3	Both	12	35-39 years	627	Rheumatoid arthritis	1	Number	2001	250.492	293.47	209.759
1	Deaths	1	Global	3	Both	12	35-39 years	627	Rheumatoid arthritis	2	Percent	2001	0.000183281	0.00021624	0.000156394
1	Deaths	1	Global	3	Both	12	35-39 years	627	Rheumatoid arthritis	3	Rate	2001	0.0560823	0.0657048	0.0469626
1	Deaths	1	Global	3	Both	13	40-44 years	627	Rheumatoid arthritis	1	Number	2001	342.576	393.547	299.687
1	Deaths	1	Global	3	Both	13	40-44 years	627	Rheumatoid arthritis	2	Percent	2001	0.000225954	0.000261354	0.00019613
1	Deaths	1	Global	3	Both	13	40-44 years	627	Rheumatoid arthritis	3	Rate	2001	0.0918361	0.1055	0.0803387
1	Deaths	1	Global	3	Both	14	45-49 years	627	Rheumatoid arthritis	1	Number	2001	586.762	674.437	516.258
1	Deaths	1	Global	3	Both	14	45-49 years	627	Rheumatoid arthritis	2	Percent	2001	0.000320231	0.000367102	0.000281745
1	Deaths	1	Global	3	Both	14	45-49 years	627	Rheumatoid arthritis	3	Rate	2001	0.174285	0.200327	0.153343
1	Deaths	1	Global	3	Both	15	50-54 years	627	Rheumatoid arthritis	1	Number	2001	923.191	1025.83	825.502
1	Deaths	1	Global	3	Both	15	50-54 years	627	Rheumatoid arthritis	2	Percent	2001	0.000424288	0.000471925	0.000379482
1	Deaths	1	Global	3	Both	15	50-54 years	627	Rheumatoid arthritis	3	Rate	2001	0.336892	0.374346	0.301243
1	Deaths	1	Global	3	Both	16	55-59 years	627	Rheumatoid arthritis	1	Number	2001	1283.26	1437.3	1127.02
1	Deaths	1	Global	3	Both	16	55-59 years	627	Rheumatoid arthritis	2	Percent	2001	0.00052496	0.000588068	0.000461261
1	Deaths	1	Global	3	Both	16	55-59 years	627	Rheumatoid arthritis	3	Rate	2001	0.616321	0.690305	0.541285
1	Deaths	1	Global	3	Both	17	60-64 years	627	Rheumatoid arthritis	1	Number	2001	2243.12	2584.72	1948.4
1	Deaths	1	Global	3	Both	17	60-64 years	627	Rheumatoid arthritis	2	Percent	2001	0.000674758	0.000775912	0.000588215
1	Deaths	1	Global	3	Both	17	60-64 years	627	Rheumatoid arthritis	3	Rate	2001	1.19044	1.37173	1.03403
1	Deaths	1	Global	3	Both	18	65-69 years	627	Rheumatoid arthritis	1	Number	2001	3425.76	4021.84	2890.35
1	Deaths	1	Global	3	Both	18	65-69 years	627	Rheumatoid arthritis	2	Percent	2001	0.000823433	0.000963974	0.000699298
1	Deaths	1	Global	3	Both	18	65-69 years	627	Rheumatoid arthritis	3	Rate	2001	2.20666	2.59061	1.86178
1	Deaths	1	Global	3	Both	19	70-74 years	627	Rheumatoid arthritis	1	Number	2001	4260.41	4880.47	3648.15
1	Deaths	1	Global	3	Both	19	70-74 years	627	Rheumatoid arthritis	2	Percent	2001	0.000849665	0.000969128	0.000727964
1	Deaths	1	Global	3	Both	19	70-74 years	627	Rheumatoid arthritis	3	Rate	2001	3.49571	4.00448	2.99335
1	Deaths	1	Global	3	Both	20	75-79 years	627	Rheumatoid arthritis	1	Number	2001	4671.74	5188.61	4018.7
1	Deaths	1	Global	3	Both	20	75-79 years	627	Rheumatoid arthritis	2	Percent	2001	0.000928996	0.00103835	0.000798836
1	Deaths	1	Global	3	Both	20	75-79 years	627	Rheumatoid arthritis	3	Rate	2001	5.72717	6.36081	4.9266
1	Deaths	1	Global	3	Both	30	80-84 years	627	Rheumatoid arthritis	1	Number	2001	3408.37	3845.41	2802.42
1	Deaths	1	Global	3	Both	30	80-84 years	627	Rheumatoid arthritis	2	Percent	2001	0.000806206	0.000913878	0.00066558
1	Deaths	1	Global	3	Both	30	80-84 years	627	Rheumatoid arthritis	3	Rate	2001	7.66429	8.64705	6.30171
1	Deaths	1	Global	3	Both	31	85-89 years	627	Rheumatoid arthritis	1	Number	2001	2413.49	2720.02	1974.73
1	Deaths	1	Global	3	Both	31	85-89 years	627	Rheumatoid arthritis	2	Percent	2001	0.000713248	0.000800658	0.000583511
1	Deaths	1	Global	3	Both	31	85-89 years	627	Rheumatoid arthritis	3	Rate	2001	11.1516	12.568	9.12433
1	Deaths	1	Global	3	Both	32	90-94 years	627	Rheumatoid arthritis	1	Number	2001	1013.2	1151.22	798.467
1	Deaths	1	Global	3	Both	32	90-94 years	627	Rheumatoid arthritis	2	Percent	2001	0.000587083	0.000668696	0.000462471
1	Deaths	1	Global	3	Both	32	90-94 years	627	Rheumatoid arthritis	3	Rate	2001	13.3532	15.1722	10.5232
1	Deaths	1	Global	3	Both	235	95+ years	627	Rheumatoid arthritis	1	Number	2001	301.398	346.71	231.001
1	Deaths	1	Global	3	Both	235	95+ years	627	Rheumatoid arthritis	2	Percent	2001	0.000529335	0.00060835	0.000406699
1	Deaths	1	Global	3	Both	235	95+ years	627	Rheumatoid arthritis	3	Rate	2001	15.7901	18.164	12.102
1	Deaths	1	Global	3	Both	6	5-9 years	627	Rheumatoid arthritis	1	Number	2005	25.7561	32.4371	20.7758
1	Deaths	1	Global	3	Both	6	5-9 years	627	Rheumatoid arthritis	2	Percent	2005	4.20713e-05	5.3127e-05	3.34751e-05
1	Deaths	1	Global	3	Both	6	5-9 years	627	Rheumatoid arthritis	3	Rate	2005	0.00430949	0.00542736	0.00347619
1	Deaths	1	Global	3	Both	7	10-14 years	627	Rheumatoid arthritis	1	Number	2005	39.5371	48.994	31.4883
1	Deaths	1	Global	3	Both	7	10-14 years	627	Rheumatoid arthritis	2	Percent	2005	9.29565e-05	0.000114763	7.41482e-05
1	Deaths	1	Global	3	Both	7	10-14 years	627	Rheumatoid arthritis	3	Rate	2005	0.006483	0.00803368	0.00516322
1	Deaths	1	Global	3	Both	8	15-19 years	627	Rheumatoid arthritis	1	Number	2005	68.6242	86.7737	55.48
1	Deaths	1	Global	3	Both	8	15-19 years	627	Rheumatoid arthritis	2	Percent	2005	9.68694e-05	0.000119965	7.83266e-05
1	Deaths	1	Global	3	Both	8	15-19 years	627	Rheumatoid arthritis	3	Rate	2005	0.0110369	0.0139559	0.00892289
1	Deaths	1	Global	3	Both	9	20-24 years	627	Rheumatoid arthritis	1	Number	2005	75.1156	95.67	61.9408
1	Deaths	1	Global	3	Both	9	20-24 years	627	Rheumatoid arthritis	2	Percent	2005	8.55754e-05	0.000106673	7.23962e-05
1	Deaths	1	Global	3	Both	9	20-24 years	627	Rheumatoid arthritis	3	Rate	2005	0.013468	0.0171533	0.0111058
1	Deaths	1	Global	3	Both	10	25-29 years	627	Rheumatoid arthritis	1	Number	2005	101.704	122.19	85.7285
1	Deaths	1	Global	3	Both	10	25-29 years	627	Rheumatoid arthritis	2	Percent	2005	0.000103635	0.000125566	8.72147e-05
1	Deaths	1	Global	3	Both	10	25-29 years	627	Rheumatoid arthritis	3	Rate	2005	0.0200557	0.0240953	0.0169053
1	Deaths	1	Global	3	Both	11	30-34 years	627	Rheumatoid arthritis	1	Number	2005	166.781	196.558	144.725
1	Deaths	1	Global	3	Both	11	30-34 years	627	Rheumatoid arthritis	2	Percent	2005	0.000142844	0.000169568	0.00012217
1	Deaths	1	Global	3	Both	11	30-34 years	627	Rheumatoid arthritis	3	Rate	2005	0.0335524	0.0395428	0.0291153
1	Deaths	1	Global	3	Both	12	35-39 years	627	Rheumatoid arthritis	1	Number	2005	273.513	321.952	231.197
1	Deaths	1	Global	3	Both	12	35-39 years	627	Rheumatoid arthritis	2	Percent	2005	0.000196837	0.000232333	0.000167575
1	Deaths	1	Global	3	Both	12	35-39 years	627	Rheumatoid arthritis	3	Rate	2005	0.0576016	0.0678026	0.0486898
1	Deaths	1	Global	3	Both	13	40-44 years	627	Rheumatoid arthritis	1	Number	2005	406.195	464.751	339.484
1	Deaths	1	Global	3	Both	13	40-44 years	627	Rheumatoid arthritis	2	Percent	2005	0.000247587	0.000281878	0.000208449
1	Deaths	1	Global	3	Both	13	40-44 years	627	Rheumatoid arthritis	3	Rate	2005	0.0960165	0.109858	0.0802474
1	Deaths	1	Global	3	Both	14	45-49 years	627	Rheumatoid arthritis	1	Number	2005	606.418	683.407	518.482
1	Deaths	1	Global	3	Both	14	45-49 years	627	Rheumatoid arthritis	2	Percent	2005	0.000320741	0.0003622	0.00027422
1	Deaths	1	Global	3	Both	14	45-49 years	627	Rheumatoid arthritis	3	Rate	2005	0.171007	0.192717	0.146209
1	Deaths	1	Global	3	Both	15	50-54 years	627	Rheumatoid arthritis	1	Number	2005	1069.19	1178.09	930.243
1	Deaths	1	Global	3	Both	15	50-54 years	627	Rheumatoid arthritis	2	Percent	2005	0.000442487	0.000489576	0.000384275
1	Deaths	1	Global	3	Both	15	50-54 years	627	Rheumatoid arthritis	3	Rate	2005	0.339926	0.374546	0.295749
1	Deaths	1	Global	3	Both	16	55-59 years	627	Rheumatoid arthritis	1	Number	2005	1502.69	1674.41	1310.05
1	Deaths	1	Global	3	Both	16	55-59 years	627	Rheumatoid arthritis	2	Percent	2005	0.000552657	0.000611277	0.000484049
1	Deaths	1	Global	3	Both	16	55-59 years	627	Rheumatoid arthritis	3	Rate	2005	0.604333	0.673393	0.526859
1	Deaths	1	Global	3	Both	17	60-64 years	627	Rheumatoid arthritis	1	Number	2005	2265.91	2625.34	1889
1	Deaths	1	Global	3	Both	17	60-64 years	627	Rheumatoid arthritis	2	Percent	2005	0.000708581	0.000816782	0.000590705
1	Deaths	1	Global	3	Both	17	60-64 years	627	Rheumatoid arthritis	3	Rate	2005	1.16641	1.35144	0.972395
1	Deaths	1	Global	3	Both	18	65-69 years	627	Rheumatoid arthritis	1	Number	2005	3521.67	4134.61	2958.77
1	Deaths	1	Global	3	Both	18	65-69 years	627	Rheumatoid arthritis	2	Percent	2005	0.000834085	0.000973448	0.000699786
1	Deaths	1	Global	3	Both	18	65-69 years	627	Rheumatoid arthritis	3	Rate	2005	2.09864	2.4639	1.76319
1	Deaths	1	Global	3	Both	19	70-74 years	627	Rheumatoid arthritis	1	Number	2005	4583.38	5365.05	3747.32
1	Deaths	1	Global	3	Both	19	70-74 years	627	Rheumatoid arthritis	2	Percent	2005	0.000897925	0.00105197	0.000736609
1	Deaths	1	Global	3	Both	19	70-74 years	627	Rheumatoid arthritis	3	Rate	2005	3.52521	4.12642	2.88217
1	Deaths	1	Global	3	Both	20	75-79 years	627	Rheumatoid arthritis	1	Number	2005	5065.18	5744.87	4270.51
1	Deaths	1	Global	3	Both	20	75-79 years	627	Rheumatoid arthritis	2	Percent	2005	0.000915949	0.00103151	0.000769574
1	Deaths	1	Global	3	Both	20	75-79 years	627	Rheumatoid arthritis	3	Rate	2005	5.45562	6.18771	4.5997
1	Deaths	1	Global	3	Both	30	80-84 years	627	Rheumatoid arthritis	1	Number	2005	4070.91	4658.56	3323.04
1	Deaths	1	Global	3	Both	30	80-84 years	627	Rheumatoid arthritis	2	Percent	2005	0.000819647	0.000934042	0.000662936
1	Deaths	1	Global	3	Both	30	80-84 years	627	Rheumatoid arthritis	3	Rate	2005	7.57565	8.66923	6.18393
1	Deaths	1	Global	3	Both	31	85-89 years	627	Rheumatoid arthritis	1	Number	2005	2709.29	3088.48	2153.06
1	Deaths	1	Global	3	Both	31	85-89 years	627	Rheumatoid arthritis	2	Percent	2005	0.000769946	0.000881988	0.000616426
1	Deaths	1	Global	3	Both	31	85-89 years	627	Rheumatoid arthritis	3	Rate	2005	11.5792	13.1999	9.20198
1	Deaths	1	Global	3	Both	32	90-94 years	627	Rheumatoid arthritis	1	Number	2005	1192.2	1366.02	933.228
1	Deaths	1	Global	3	Both	32	90-94 years	627	Rheumatoid arthritis	2	Percent	2005	0.000620999	0.000712341	0.00048678
1	Deaths	1	Global	3	Both	32	90-94 years	627	Rheumatoid arthritis	3	Rate	2005	13.6887	15.6845	10.7153
1	Deaths	1	Global	3	Both	235	95+ years	627	Rheumatoid arthritis	1	Number	2005	375.852	438.029	287.289
1	Deaths	1	Global	3	Both	235	95+ years	627	Rheumatoid arthritis	2	Percent	2005	0.000543185	0.000630325	0.000413806
1	Deaths	1	Global	3	Both	235	95+ years	627	Rheumatoid arthritis	3	Rate	2005	15.584	18.1621	11.9119
1	Deaths	1	Global	3	Both	6	5-9 years	627	Rheumatoid arthritis	1	Number	2008	23.3519	29.3151	18.9285
1	Deaths	1	Global	3	Both	6	5-9 years	627	Rheumatoid arthritis	2	Percent	2008	4.08877e-05	5.18616e-05	3.31669e-05
1	Deaths	1	Global	3	Both	6	5-9 years	627	Rheumatoid arthritis	3	Rate	2008	0.00386319	0.0048497	0.00313141
1	Deaths	1	Global	3	Both	7	10-14 years	627	Rheumatoid arthritis	1	Number	2008	34.9946	43.9638	28.3805
1	Deaths	1	Global	3	Both	7	10-14 years	627	Rheumatoid arthritis	2	Percent	2008	8.69666e-05	0.000108406	7.11179e-05
1	Deaths	1	Global	3	Both	7	10-14 years	627	Rheumatoid arthritis	3	Rate	2008	0.00579434	0.00727945	0.00469919
1	Deaths	1	Global	3	Both	8	15-19 years	627	Rheumatoid arthritis	1	Number	2008	59.7213	74.1885	48.5342
1	Deaths	1	Global	3	Both	8	15-19 years	627	Rheumatoid arthritis	2	Percent	2008	8.90979e-05	0.000109852	7.25444e-05
1	Deaths	1	Global	3	Both	8	15-19 years	627	Rheumatoid arthritis	3	Rate	2008	0.00964763	0.0119847	0.00784042
1	Deaths	1	Global	3	Both	9	20-24 years	627	Rheumatoid arthritis	1	Number	2008	75.3759	94.3093	62.1795
1	Deaths	1	Global	3	Both	9	20-24 years	627	Rheumatoid arthritis	2	Percent	2008	8.59136e-05	0.000107088	7.10018e-05
1	Deaths	1	Global	3	Both	9	20-24 years	627	Rheumatoid arthritis	3	Rate	2008	0.0125985	0.0157631	0.0103928
1	Deaths	1	Global	3	Both	10	25-29 years	627	Rheumatoid arthritis	1	Number	2008	93.716	112.88	80.1806
1	Deaths	1	Global	3	Both	10	25-29 years	627	Rheumatoid arthritis	2	Percent	2008	9.9913e-05	0.000120152	8.40542e-05
1	Deaths	1	Global	3	Both	10	25-29 years	627	Rheumatoid arthritis	3	Rate	2008	0.0176352	0.0212415	0.0150882
1	Deaths	1	Global	3	Both	11	30-34 years	627	Rheumatoid arthritis	1	Number	2008	145.454	173.593	121.487
1	Deaths	1	Global	3	Both	11	30-34 years	627	Rheumatoid arthritis	2	Percent	2008	0.000132689	0.000157957	0.000109599
1	Deaths	1	Global	3	Both	11	30-34 years	627	Rheumatoid arthritis	3	Rate	2008	0.0291069	0.0347377	0.0243109
1	Deaths	1	Global	3	Both	12	35-39 years	627	Rheumatoid arthritis	1	Number	2008	246.473	284.224	201.614
1	Deaths	1	Global	3	Both	12	35-39 years	627	Rheumatoid arthritis	2	Percent	2008	0.000184562	0.000217218	0.000152918
1	Deaths	1	Global	3	Both	12	35-39 years	627	Rheumatoid arthritis	3	Rate	2008	0.0503573	0.0580703	0.0411921
1	Deaths	1	Global	3	Both	13	40-44 years	627	Rheumatoid arthritis	1	Number	2008	422.196	484.723	346.55
1	Deaths	1	Global	3	Both	13	40-44 years	627	Rheumatoid arthritis	2	Percent	2008	0.000260645	0.000299126	0.000213174
1	Deaths	1	Global	3	Both	13	40-44 years	627	Rheumatoid arthritis	3	Rate	2008	0.0930446	0.106824	0.0763735
1	Deaths	1	Global	3	Both	14	45-49 years	627	Rheumatoid arthritis	1	Number	2008	602.373	686.272	518.702
1	Deaths	1	Global	3	Both	14	45-49 years	627	Rheumatoid arthritis	2	Percent	2008	0.000323041	0.000368837	0.000276142
1	Deaths	1	Global	3	Both	14	45-49 years	627	Rheumatoid arthritis	3	Rate	2008	0.157832	0.179815	0.135909
1	Deaths	1	Global	3	Both	15	50-54 years	627	Rheumatoid arthritis	1	Number	2008	1031.74	1145.85	894.439
1	Deaths	1	Global	3	Both	15	50-54 years	627	Rheumatoid arthritis	2	Percent	2008	0.00043251	0.000480943	0.000373328
1	Deaths	1	Global	3	Both	15	50-54 years	627	Rheumatoid arthritis	3	Rate	2008	0.308581	0.342708	0.267515
1	Deaths	1	Global	3	Both	16	55-59 years	627	Rheumatoid arthritis	1	Number	2008	1573.79	1745.37	1370.61
1	Deaths	1	Global	3	Both	16	55-59 years	627	Rheumatoid arthritis	2	Percent	2008	0.000547334	0.000608662	0.000475405
1	Deaths	1	Global	3	Both	16	55-59 years	627	Rheumatoid arthritis	3	Rate	2008	0.559289	0.620264	0.487083
1	Deaths	1	Global	3	Both	17	60-64 years	627	Rheumatoid arthritis	1	Number	2008	2403.95	2764.03	1992.53
1	Deaths	1	Global	3	Both	17	60-64 years	627	Rheumatoid arthritis	2	Percent	2008	0.000725518	0.000833916	0.000598371
1	Deaths	1	Global	3	Both	17	60-64 years	627	Rheumatoid arthritis	3	Rate	2008	1.11447	1.2814	0.923734
1	Deaths	1	Global	3	Both	18	65-69 years	627	Rheumatoid arthritis	1	Number	2008	3441.12	4080.82	2824.51
1	Deaths	1	Global	3	Both	18	65-69 years	627	Rheumatoid arthritis	2	Percent	2008	0.000846151	0.00100336	0.000695259
1	Deaths	1	Global	3	Both	18	65-69 years	627	Rheumatoid arthritis	3	Rate	2008	1.97813	2.34587	1.62368
1	Deaths	1	Global	3	Both	19	70-74 years	627	Rheumatoid arthritis	1	Number	2008	4680.57	5588.72	3756.06
1	Deaths	1	Global	3	Both	19	70-74 years	627	Rheumatoid arthritis	2	Percent	2008	0.000910955	0.00108948	0.000733829
1	Deaths	1	Global	3	Both	19	70-74 years	627	Rheumatoid arthritis	3	Rate	2008	3.35226	4.00268	2.69012
1	Deaths	1	Global	3	Both	20	75-79 years	627	Rheumatoid arthritis	1	Number	2008	5305.68	6003.89	4416.28
1	Deaths	1	Global	3	Both	20	75-79 years	627	Rheumatoid arthritis	2	Percent	2008	0.000945518	0.0010763	0.000787806
1	Deaths	1	Global	3	Both	20	75-79 years	627	Rheumatoid arthritis	3	Rate	2008	5.32747	6.02855	4.43442
1	Deaths	1	Global	3	Both	30	80-84 years	627	Rheumatoid arthritis	1	Number	2008	4386.15	5121.89	3504.87
1	Deaths	1	Global	3	Both	30	80-84 years	627	Rheumatoid arthritis	2	Percent	2008	0.00081778	0.00095065	0.000658727
1	Deaths	1	Global	3	Both	30	80-84 years	627	Rheumatoid arthritis	3	Rate	2008	7.25416	8.47098	5.79662
1	Deaths	1	Global	3	Both	31	85-89 years	627	Rheumatoid arthritis	1	Number	2008	3085.67	3512.03	2442.37
1	Deaths	1	Global	3	Both	31	85-89 years	627	Rheumatoid arthritis	2	Percent	2008	0.000782503	0.000893796	0.000621419
1	Deaths	1	Global	3	Both	31	85-89 years	627	Rheumatoid arthritis	3	Rate	2008	11.0664	12.5955	8.75927
1	Deaths	1	Global	3	Both	32	90-94 years	627	Rheumatoid arthritis	1	Number	2008	1298.33	1512.79	1006.96
1	Deaths	1	Global	3	Both	32	90-94 years	627	Rheumatoid arthritis	2	Percent	2008	0.00065225	0.000758771	0.000503038
1	Deaths	1	Global	3	Both	32	90-94 years	627	Rheumatoid arthritis	3	Rate	2008	14.012	16.3265	10.8674
1	Deaths	1	Global	3	Both	235	95+ years	627	Rheumatoid arthritis	1	Number	2008	449.243	518.723	339.236
1	Deaths	1	Global	3	Both	235	95+ years	627	Rheumatoid arthritis	2	Percent	2008	0.000558321	0.000645341	0.000422372
1	Deaths	1	Global	3	Both	235	95+ years	627	Rheumatoid arthritis	3	Rate	2008	15.9019	18.3613	12.008
1	Deaths	1	Global	3	Both	6	5-9 years	627	Rheumatoid arthritis	1	Number	2007	22.8513	29.0436	18.4635
1	Deaths	1	Global	3	Both	6	5-9 years	627	Rheumatoid arthritis	2	Percent	2007	4.02776e-05	5.10439e-05	3.24065e-05
1	Deaths	1	Global	3	Both	6	5-9 years	627	Rheumatoid arthritis	3	Rate	2007	0.00380067	0.0048306	0.00307089
1	Deaths	1	Global	3	Both	7	10-14 years	627	Rheumatoid arthritis	1	Number	2007	35.6724	44.6792	28.8596
1	Deaths	1	Global	3	Both	7	10-14 years	627	Rheumatoid arthritis	2	Percent	2007	9.03971e-05	0.000112769	7.323e-05
1	Deaths	1	Global	3	Both	7	10-14 years	627	Rheumatoid arthritis	3	Rate	2007	0.00589657	0.00738539	0.00477043
1	Deaths	1	Global	3	Both	8	15-19 years	627	Rheumatoid arthritis	1	Number	2007	62.1124	77.0688	50.1944
1	Deaths	1	Global	3	Both	8	15-19 years	627	Rheumatoid arthritis	2	Percent	2007	9.29833e-05	0.000115326	7.5152e-05
1	Deaths	1	Global	3	Both	8	15-19 years	627	Rheumatoid arthritis	3	Rate	2007	0.00998159	0.0123851	0.00806635
1	Deaths	1	Global	3	Both	9	20-24 years	627	Rheumatoid arthritis	1	Number	2007	75.2573	94.1217	62.5667
1	Deaths	1	Global	3	Both	9	20-24 years	627	Rheumatoid arthritis	2	Percent	2007	8.64939e-05	0.000107099	7.16406e-05
1	Deaths	1	Global	3	Both	9	20-24 years	627	Rheumatoid arthritis	3	Rate	2007	0.0128552	0.0160776	0.0106874
1	Deaths	1	Global	3	Both	10	25-29 years	627	Rheumatoid arthritis	1	Number	2007	92.5781	110.758	78.8448
1	Deaths	1	Global	3	Both	10	25-29 years	627	Rheumatoid arthritis	2	Percent	2007	9.91429e-05	0.000119224	8.35534e-05
1	Deaths	1	Global	3	Both	10	25-29 years	627	Rheumatoid arthritis	3	Rate	2007	0.0177444	0.0212289	0.0151121
1	Deaths	1	Global	3	Both	11	30-34 years	627	Rheumatoid arthritis	1	Number	2007	149.17	176.995	125.895
1	Deaths	1	Global	3	Both	11	30-34 years	627	Rheumatoid arthritis	2	Percent	2007	0.000135546	0.000161625	0.000113669
1	Deaths	1	Global	3	Both	11	30-34 years	627	Rheumatoid arthritis	3	Rate	2007	0.0299368	0.035521	0.0252658
1	Deaths	1	Global	3	Both	12	35-39 years	627	Rheumatoid arthritis	1	Number	2007	252.091	294.334	207.217
1	Deaths	1	Global	3	Both	12	35-39 years	627	Rheumatoid arthritis	2	Percent	2007	0.000187736	0.00022102	0.000155836
1	Deaths	1	Global	3	Both	12	35-39 years	627	Rheumatoid arthritis	3	Rate	2007	0.0519635	0.0606711	0.0427136
1	Deaths	1	Global	3	Both	13	40-44 years	627	Rheumatoid arthritis	1	Number	2007	427.7	486.361	355.284
1	Deaths	1	Global	3	Both	13	40-44 years	627	Rheumatoid arthritis	2	Percent	2007	0.000259849	0.000297751	0.000215702
1	Deaths	1	Global	3	Both	13	40-44 years	627	Rheumatoid arthritis	3	Rate	2007	0.0958856	0.109037	0.0796509
1	Deaths	1	Global	3	Both	14	45-49 years	627	Rheumatoid arthritis	1	Number	2007	574.197	655.776	494.817
1	Deaths	1	Global	3	Both	14	45-49 years	627	Rheumatoid arthritis	2	Percent	2007	0.000313528	0.000359361	0.000269076
1	Deaths	1	Global	3	Both	14	45-49 years	627	Rheumatoid arthritis	3	Rate	2007	0.155661	0.177776	0.134141
1	Deaths	1	Global	3	Both	15	50-54 years	627	Rheumatoid arthritis	1	Number	2007	1048.31	1154.11	886.594
1	Deaths	1	Global	3	Both	15	50-54 years	627	Rheumatoid arthritis	2	Percent	2007	0.000438455	0.000484077	0.000373973
1	Deaths	1	Global	3	Both	15	50-54 years	627	Rheumatoid arthritis	3	Rate	2007	0.318257	0.350378	0.269162
1	Deaths	1	Global	3	Both	16	55-59 years	627	Rheumatoid arthritis	1	Number	2007	1539.33	1704.9	1340.32
1	Deaths	1	Global	3	Both	16	55-59 years	627	Rheumatoid arthritis	2	Percent	2007	0.000547049	0.000604428	0.000478728
1	Deaths	1	Global	3	Both	16	55-59 years	627	Rheumatoid arthritis	3	Rate	2007	0.568106	0.629208	0.494656
1	Deaths	1	Global	3	Both	17	60-64 years	627	Rheumatoid arthritis	1	Number	2007	2317.69	2672.27	1920.82
1	Deaths	1	Global	3	Both	17	60-64 years	627	Rheumatoid arthritis	2	Percent	2007	0.000720716	0.000826941	0.000592912
1	Deaths	1	Global	3	Both	17	60-64 years	627	Rheumatoid arthritis	3	Rate	2007	1.12226	1.29396	0.930094
1	Deaths	1	Global	3	Both	18	65-69 years	627	Rheumatoid arthritis	1	Number	2007	3428.02	4089.23	2832.94
1	Deaths	1	Global	3	Both	18	65-69 years	627	Rheumatoid arthritis	2	Percent	2007	0.000843296	0.000997389	0.000706138
1	Deaths	1	Global	3	Both	18	65-69 years	627	Rheumatoid arthritis	3	Rate	2007	1.99156	2.3757	1.64584
1	Deaths	1	Global	3	Both	19	70-74 years	627	Rheumatoid arthritis	1	Number	2007	4635.18	5555.34	3760.8
1	Deaths	1	Global	3	Both	19	70-74 years	627	Rheumatoid arthritis	2	Percent	2007	0.000915087	0.00109636	0.000740068
1	Deaths	1	Global	3	Both	19	70-74 years	627	Rheumatoid arthritis	3	Rate	2007	3.40156	4.07681	2.75989
1	Deaths	1	Global	3	Both	20	75-79 years	627	Rheumatoid arthritis	1	Number	2007	5149.29	5871.08	4296.96
1	Deaths	1	Global	3	Both	20	75-79 years	627	Rheumatoid arthritis	2	Percent	2007	0.000933434	0.00106163	0.000776913
1	Deaths	1	Global	3	Both	20	75-79 years	627	Rheumatoid arthritis	3	Rate	2007	5.27874	6.01867	4.40498
1	Deaths	1	Global	3	Both	30	80-84 years	627	Rheumatoid arthritis	1	Number	2007	4195.64	4904.33	3381.58
1	Deaths	1	Global	3	Both	30	80-84 years	627	Rheumatoid arthritis	2	Percent	2007	0.00081517	0.000946	0.00065476
1	Deaths	1	Global	3	Both	30	80-84 years	627	Rheumatoid arthritis	3	Rate	2007	7.21479	8.43345	5.81495
1	Deaths	1	Global	3	Both	31	85-89 years	627	Rheumatoid arthritis	1	Number	2007	2898.73	3357.8	2319.73
1	Deaths	1	Global	3	Both	31	85-89 years	627	Rheumatoid arthritis	2	Percent	2007	0.000777545	0.000896041	0.000615191
1	Deaths	1	Global	3	Both	31	85-89 years	627	Rheumatoid arthritis	3	Rate	2007	11.0251	12.7712	8.82293
1	Deaths	1	Global	3	Both	32	90-94 years	627	Rheumatoid arthritis	1	Number	2007	1247.31	1460.09	966.636
1	Deaths	1	Global	3	Both	32	90-94 years	627	Rheumatoid arthritis	2	Percent	2007	0.000635488	0.000744713	0.000493036
1	Deaths	1	Global	3	Both	32	90-94 years	627	Rheumatoid arthritis	3	Rate	2007	13.7497	16.0952	10.6557
1	Deaths	1	Global	3	Both	235	95+ years	627	Rheumatoid arthritis	1	Number	2007	418.961	487.827	317.571
1	Deaths	1	Global	3	Both	235	95+ years	627	Rheumatoid arthritis	2	Percent	2007	0.000548064	0.000639236	0.000415218
1	Deaths	1	Global	3	Both	235	95+ years	627	Rheumatoid arthritis	3	Rate	2007	15.6298	18.199	11.8474
1	Deaths	1	Global	3	Both	6	5-9 years	627	Rheumatoid arthritis	1	Number	2013	18.9164	24.0622	15.7893
1	Deaths	1	Global	3	Both	6	5-9 years	627	Rheumatoid arthritis	2	Percent	2013	3.83614e-05	4.83647e-05	3.1832e-05
1	Deaths	1	Global	3	Both	6	5-9 years	627	Rheumatoid arthritis	3	Rate	2013	0.00296658	0.00377358	0.00247618
1	Deaths	1	Global	3	Both	7	10-14 years	627	Rheumatoid arthritis	1	Number	2013	29.5685	38.0926	23.7676
1	Deaths	1	Global	3	Both	7	10-14 years	627	Rheumatoid arthritis	2	Percent	2013	8.44637e-05	0.000106252	6.88608e-05
1	Deaths	1	Global	3	Both	7	10-14 years	627	Rheumatoid arthritis	3	Rate	2013	0.00485006	0.00624824	0.00389855
1	Deaths	1	Global	3	Both	8	15-19 years	627	Rheumatoid arthritis	1	Number	2013	46.7738	59.2144	38.2661
1	Deaths	1	Global	3	Both	8	15-19 years	627	Rheumatoid arthritis	2	Percent	2013	7.68902e-05	9.69932e-05	6.37356e-05
1	Deaths	1	Global	3	Both	8	15-19 years	627	Rheumatoid arthritis	3	Rate	2013	0.00775587	0.00981871	0.00634515
1	Deaths	1	Global	3	Both	9	20-24 years	627	Rheumatoid arthritis	1	Number	2013	60.1057	78.5071	50.08
1	Deaths	1	Global	3	Both	9	20-24 years	627	Rheumatoid arthritis	2	Percent	2013	7.60777e-05	9.8715e-05	6.37442e-05
1	Deaths	1	Global	3	Both	9	20-24 years	627	Rheumatoid arthritis	3	Rate	2013	0.00985825	0.0128763	0.00821388
1	Deaths	1	Global	3	Both	10	25-29 years	627	Rheumatoid arthritis	1	Number	2013	88.3842	109.127	73.4913
1	Deaths	1	Global	3	Both	10	25-29 years	627	Rheumatoid arthritis	2	Percent	2013	0.00010172	0.00012612	8.48986e-05
1	Deaths	1	Global	3	Both	10	25-29 years	627	Rheumatoid arthritis	3	Rate	2013	0.0149188	0.0184201	0.0124049
1	Deaths	1	Global	3	Both	11	30-34 years	627	Rheumatoid arthritis	1	Number	2013	124.288	151.259	106.275
1	Deaths	1	Global	3	Both	11	30-34 years	627	Rheumatoid arthritis	2	Percent	2013	0.000127719	0.000154329	0.000110247
1	Deaths	1	Global	3	Both	11	30-34 years	627	Rheumatoid arthritis	3	Rate	2013	0.0234129	0.0284937	0.0200197
1	Deaths	1	Global	3	Both	12	35-39 years	627	Rheumatoid arthritis	1	Number	2013	207.169	245.777	172.415
1	Deaths	1	Global	3	Both	12	35-39 years	627	Rheumatoid arthritis	2	Percent	2013	0.000177826	0.000211025	0.000150709
1	Deaths	1	Global	3	Both	12	35-39 years	627	Rheumatoid arthritis	3	Rate	2013	0.041723	0.0494984	0.0347237
1	Deaths	1	Global	3	Both	13	40-44 years	627	Rheumatoid arthritis	1	Number	2013	353.948	413.93	297.513
1	Deaths	1	Global	3	Both	13	40-44 years	627	Rheumatoid arthritis	2	Percent	2013	0.000240469	0.000281162	0.000201021
1	Deaths	1	Global	3	Both	13	40-44 years	627	Rheumatoid arthritis	3	Rate	2013	0.0738315	0.0863433	0.0620594
1	Deaths	1	Global	3	Both	14	45-49 years	627	Rheumatoid arthritis	1	Number	2013	648.243	744.268	542.17
1	Deaths	1	Global	3	Both	14	45-49 years	627	Rheumatoid arthritis	2	Percent	2013	0.000340593	0.000391631	0.00028832
1	Deaths	1	Global	3	Both	14	45-49 years	627	Rheumatoid arthritis	3	Rate	2013	0.146733	0.168469	0.122723
1	Deaths	1	Global	3	Both	15	50-54 years	627	Rheumatoid arthritis	1	Number	2013	944.405	1076.94	818.621
1	Deaths	1	Global	3	Both	15	50-54 years	627	Rheumatoid arthritis	2	Percent	2013	0.000404015	0.000456636	0.000351804
1	Deaths	1	Global	3	Both	15	50-54 years	627	Rheumatoid arthritis	3	Rate	2013	0.255902	0.291816	0.221819
1	Deaths	1	Global	3	Both	16	55-59 years	627	Rheumatoid arthritis	1	Number	2013	1558.99	1760.5	1343.1
1	Deaths	1	Global	3	Both	16	55-59 years	627	Rheumatoid arthritis	2	Percent	2013	0.000519555	0.00058643	0.000451452
1	Deaths	1	Global	3	Both	16	55-59 years	627	Rheumatoid arthritis	3	Rate	2013	0.484375	0.546984	0.417298
1	Deaths	1	Global	3	Both	17	60-64 years	627	Rheumatoid arthritis	1	Number	2013	2646.42	3054.72	2226.36
1	Deaths	1	Global	3	Both	17	60-64 years	627	Rheumatoid arthritis	2	Percent	2013	0.000696591	0.000808674	0.000585986
1	Deaths	1	Global	3	Both	17	60-64 years	627	Rheumatoid arthritis	3	Rate	2013	0.978081	1.12898	0.822831
1	Deaths	1	Global	3	Both	18	65-69 years	627	Rheumatoid arthritis	1	Number	2013	3560.82	4263.43	2949.63
1	Deaths	1	Global	3	Both	18	65-69 years	627	Rheumatoid arthritis	2	Percent	2013	0.000852985	0.00101984	0.00071271
1	Deaths	1	Global	3	Both	18	65-69 years	627	Rheumatoid arthritis	3	Rate	2013	1.78835	2.14123	1.48139
1	Deaths	1	Global	3	Both	19	70-74 years	627	Rheumatoid arthritis	1	Number	2013	4643.94	5510.89	3804.79
1	Deaths	1	Global	3	Both	19	70-74 years	627	Rheumatoid arthritis	2	Percent	2013	0.000914965	0.00107962	0.00075376
1	Deaths	1	Global	3	Both	19	70-74 years	627	Rheumatoid arthritis	3	Rate	2013	3.04783	3.61681	2.49709
1	Deaths	1	Global	3	Both	20	75-79 years	627	Rheumatoid arthritis	1	Number	2013	5587.14	6338.99	4696.9
1	Deaths	1	Global	3	Both	20	75-79 years	627	Rheumatoid arthritis	2	Percent	2013	0.000957193	0.00108834	0.000796865
1	Deaths	1	Global	3	Both	20	75-79 years	627	Rheumatoid arthritis	3	Rate	2013	4.94154	5.60651	4.15416
1	Deaths	1	Global	3	Both	30	80-84 years	627	Rheumatoid arthritis	1	Number	2013	4973.95	5959.83	3967.39
1	Deaths	1	Global	3	Both	30	80-84 years	627	Rheumatoid arthritis	2	Percent	2013	0.000834779	0.000996012	0.000663173
1	Deaths	1	Global	3	Both	30	80-84 years	627	Rheumatoid arthritis	3	Rate	2013	7.06077	8.46028	5.63191
1	Deaths	1	Global	3	Both	31	85-89 years	627	Rheumatoid arthritis	1	Number	2013	3691.53	4291.25	2899.74
1	Deaths	1	Global	3	Both	31	85-89 years	627	Rheumatoid arthritis	2	Percent	2013	0.000770173	0.000891532	0.000605719
1	Deaths	1	Global	3	Both	31	85-89 years	627	Rheumatoid arthritis	3	Rate	2013	10.4587	12.1578	8.21546
1	Deaths	1	Global	3	Both	32	90-94 years	627	Rheumatoid arthritis	1	Number	2013	1678.25	1965.09	1285.52
1	Deaths	1	Global	3	Both	32	90-94 years	627	Rheumatoid arthritis	2	Percent	2013	0.000648196	0.00075881	0.000493516
1	Deaths	1	Global	3	Both	32	90-94 years	627	Rheumatoid arthritis	3	Rate	2013	13.4343	15.7304	10.2905
1	Deaths	1	Global	3	Both	235	95+ years	627	Rheumatoid arthritis	1	Number	2013	565.007	663.548	418.417
1	Deaths	1	Global	3	Both	235	95+ years	627	Rheumatoid arthritis	2	Percent	2013	0.00058029	0.000679027	0.000430367
1	Deaths	1	Global	3	Both	235	95+ years	627	Rheumatoid arthritis	3	Rate	2013	16.153	18.9702	11.9621
1	Deaths	1	Global	3	Both	6	5-9 years	627	Rheumatoid arthritis	1	Number	2011	20.2251	25.8903	16.7252
1	Deaths	1	Global	3	Both	6	5-9 years	627	Rheumatoid arthritis	2	Percent	2011	3.7716e-05	4.77942e-05	3.12727e-05
1	Deaths	1	Global	3	Both	6	5-9 years	627	Rheumatoid arthritis	3	Rate	2011	0.00325829	0.00417095	0.00269446
1	Deaths	1	Global	3	Both	7	10-14 years	627	Rheumatoid arthritis	1	Number	2011	32.0374	40.6723	25.8528
1	Deaths	1	Global	3	Both	7	10-14 years	627	Rheumatoid arthritis	2	Percent	2011	8.41519e-05	0.000107026	6.89493e-05
1	Deaths	1	Global	3	Both	7	10-14 years	627	Rheumatoid arthritis	3	Rate	2011	0.00529653	0.00672408	0.00427407
1	Deaths	1	Global	3	Both	8	15-19 years	627	Rheumatoid arthritis	1	Number	2011	50.494	63.5077	41.0815
1	Deaths	1	Global	3	Both	8	15-19 years	627	Rheumatoid arthritis	2	Percent	2011	8.06088e-05	0.000101434	6.61977e-05
1	Deaths	1	Global	3	Both	8	15-19 years	627	Rheumatoid arthritis	3	Rate	2011	0.00832739	0.0104736	0.0067751
1	Deaths	1	Global	3	Both	9	20-24 years	627	Rheumatoid arthritis	1	Number	2011	67.7274	86.6847	56.5639
1	Deaths	1	Global	3	Both	9	20-24 years	627	Rheumatoid arthritis	2	Percent	2011	8.22096e-05	0.000104712	6.82434e-05
1	Deaths	1	Global	3	Both	9	20-24 years	627	Rheumatoid arthritis	3	Rate	2011	0.0109996	0.0140784	0.00918654
1	Deaths	1	Global	3	Both	10	25-29 years	627	Rheumatoid arthritis	1	Number	2011	90.5237	108.528	75.8345
1	Deaths	1	Global	3	Both	10	25-29 years	627	Rheumatoid arthritis	2	Percent	2011	0.00010074	0.000122198	8.43107e-05
1	Deaths	1	Global	3	Both	10	25-29 years	627	Rheumatoid arthritis	3	Rate	2011	0.0159499	0.0191221	0.0133618
1	Deaths	1	Global	3	Both	11	30-34 years	627	Rheumatoid arthritis	1	Number	2011	131.469	157.189	111.38
1	Deaths	1	Global	3	Both	11	30-34 years	627	Rheumatoid arthritis	2	Percent	2011	0.000128849	0.000153708	0.000109887
1	Deaths	1	Global	3	Both	11	30-34 years	627	Rheumatoid arthritis	3	Rate	2011	0.0255545	0.0305538	0.0216497
1	Deaths	1	Global	3	Both	12	35-39 years	627	Rheumatoid arthritis	1	Number	2011	217.879	253.782	178.312
1	Deaths	1	Global	3	Both	12	35-39 years	627	Rheumatoid arthritis	2	Percent	2011	0.000179694	0.000209879	0.000149461
1	Deaths	1	Global	3	Both	12	35-39 years	627	Rheumatoid arthritis	3	Rate	2011	0.0439849	0.0512331	0.0359973
1	Deaths	1	Global	3	Both	13	40-44 years	627	Rheumatoid arthritis	1	Number	2011	365.843	424.168	299.35
1	Deaths	1	Global	3	Both	13	40-44 years	627	Rheumatoid arthritis	2	Percent	2011	0.00024157	0.000280127	0.00019582
1	Deaths	1	Global	3	Both	13	40-44 years	627	Rheumatoid arthritis	3	Rate	2011	0.0777883	0.0901899	0.0636502
1	Deaths	1	Global	3	Both	14	45-49 years	627	Rheumatoid arthritis	1	Number	2011	640.475	737.968	538.524
1	Deaths	1	Global	3	Both	14	45-49 years	627	Rheumatoid arthritis	2	Percent	2011	0.000334481	0.000382662	0.000283551
1	Deaths	1	Global	3	Both	14	45-49 years	627	Rheumatoid arthritis	3	Rate	2011	0.151276	0.174304	0.127196
1	Deaths	1	Global	3	Both	15	50-54 years	627	Rheumatoid arthritis	1	Number	2011	919.868	1026.45	796.471
1	Deaths	1	Global	3	Both	15	50-54 years	627	Rheumatoid arthritis	2	Percent	2011	0.000399725	0.000445654	0.00034337
1	Deaths	1	Global	3	Both	15	50-54 years	627	Rheumatoid arthritis	3	Rate	2011	0.26475	0.295426	0.229235
1	Deaths	1	Global	3	Both	16	55-59 years	627	Rheumatoid arthritis	1	Number	2011	1579.77	1777.35	1359.8
1	Deaths	1	Global	3	Both	16	55-59 years	627	Rheumatoid arthritis	2	Percent	2011	0.000530047	0.000594671	0.00045741
1	Deaths	1	Global	3	Both	16	55-59 years	627	Rheumatoid arthritis	3	Rate	2011	0.509398	0.573107	0.438468
1	Deaths	1	Global	3	Both	17	60-64 years	627	Rheumatoid arthritis	1	Number	2011	2588.99	2989.69	2167.37
1	Deaths	1	Global	3	Both	17	60-64 years	627	Rheumatoid arthritis	2	Percent	2011	0.000705776	0.00081194	0.000588982
1	Deaths	1	Global	3	Both	17	60-64 years	627	Rheumatoid arthritis	3	Rate	2011	1.0303	1.18976	0.862514
1	Deaths	1	Global	3	Both	18	65-69 years	627	Rheumatoid arthritis	1	Number	2011	3490.28	4138.9	2888.85
1	Deaths	1	Global	3	Both	18	65-69 years	627	Rheumatoid arthritis	2	Percent	2011	0.000856555	0.001015	0.000716046
1	Deaths	1	Global	3	Both	18	65-69 years	627	Rheumatoid arthritis	3	Rate	2011	1.91927	2.27594	1.58855
1	Deaths	1	Global	3	Both	19	70-74 years	627	Rheumatoid arthritis	1	Number	2011	4668.01	5552.37	3782.94
1	Deaths	1	Global	3	Both	19	70-74 years	627	Rheumatoid arthritis	2	Percent	2011	0.000905555	0.00107546	0.00073434
1	Deaths	1	Global	3	Both	19	70-74 years	627	Rheumatoid arthritis	3	Rate	2011	3.14767	3.744	2.55086
1	Deaths	1	Global	3	Both	20	75-79 years	627	Rheumatoid arthritis	1	Number	2011	5472.17	6190.61	4569.18
1	Deaths	1	Global	3	Both	20	75-79 years	627	Rheumatoid arthritis	2	Percent	2011	0.000957499	0.00108976	0.000802282
1	Deaths	1	Global	3	Both	20	75-79 years	627	Rheumatoid arthritis	3	Rate	2011	5.12464	5.79744	4.279
1	Deaths	1	Global	3	Both	30	80-84 years	627	Rheumatoid arthritis	1	Number	2011	4713.98	5470.65	3736.35
1	Deaths	1	Global	3	Both	30	80-84 years	627	Rheumatoid arthritis	2	Percent	2011	0.000816025	0.000958157	0.000653338
1	Deaths	1	Global	3	Both	30	80-84 years	627	Rheumatoid arthritis	3	Rate	2011	7.04735	8.17857	5.5858
1	Deaths	1	Global	3	Both	31	85-89 years	627	Rheumatoid arthritis	1	Number	2011	3367.02	3826.94	2684
1	Deaths	1	Global	3	Both	31	85-89 years	627	Rheumatoid arthritis	2	Percent	2011	0.00076481	0.000868112	0.000605721
1	Deaths	1	Global	3	Both	31	85-89 years	627	Rheumatoid arthritis	3	Rate	2011	10.4188	11.842	8.3053
1	Deaths	1	Global	3	Both	32	90-94 years	627	Rheumatoid arthritis	1	Number	2011	1450.67	1652.05	1113.62
1	Deaths	1	Global	3	Both	32	90-94 years	627	Rheumatoid arthritis	2	Percent	2011	0.000647243	0.000737556	0.000496348
1	Deaths	1	Global	3	Both	32	90-94 years	627	Rheumatoid arthritis	3	Rate	2011	13.2641	15.1054	10.1823
1	Deaths	1	Global	3	Both	235	95+ years	627	Rheumatoid arthritis	1	Number	2011	507.193	583.336	379.359
1	Deaths	1	Global	3	Both	235	95+ years	627	Rheumatoid arthritis	2	Percent	2011	0.000561705	0.000645907	0.000421137
1	Deaths	1	Global	3	Both	235	95+ years	627	Rheumatoid arthritis	3	Rate	2011	15.5834	17.9229	11.6557
1	Deaths	1	Global	3	Both	6	5-9 years	627	Rheumatoid arthritis	1	Number	2009	22.8207	28.3966	18.3659
1	Deaths	1	Global	3	Both	6	5-9 years	627	Rheumatoid arthritis	2	Percent	2009	4.22064e-05	5.31354e-05	3.45068e-05
1	Deaths	1	Global	3	Both	6	5-9 years	627	Rheumatoid arthritis	3	Rate	2009	0.00374819	0.00466401	0.00301652
1	Deaths	1	Global	3	Both	7	10-14 years	627	Rheumatoid arthritis	1	Number	2009	35.0166	43.9821	28.2781
1	Deaths	1	Global	3	Both	7	10-14 years	627	Rheumatoid arthritis	2	Percent	2009	9.10762e-05	0.000113668	7.47338e-05
1	Deaths	1	Global	3	Both	7	10-14 years	627	Rheumatoid arthritis	3	Rate	2009	0.00580154	0.00728693	0.0046851
1	Deaths	1	Global	3	Both	8	15-19 years	627	Rheumatoid arthritis	1	Number	2009	56.9188	71.0421	45.8865
1	Deaths	1	Global	3	Both	8	15-19 years	627	Rheumatoid arthritis	2	Percent	2009	8.8426e-05	0.000110555	7.15775e-05
1	Deaths	1	Global	3	Both	8	15-19 years	627	Rheumatoid arthritis	3	Rate	2009	0.00925942	0.011557	0.00746471
1	Deaths	1	Global	3	Both	9	20-24 years	627	Rheumatoid arthritis	1	Number	2009	75.1437	93.294	60.4864
1	Deaths	1	Global	3	Both	9	20-24 years	627	Rheumatoid arthritis	2	Percent	2009	8.81983e-05	0.000109378	7.21382e-05
1	Deaths	1	Global	3	Both	9	20-24 years	627	Rheumatoid arthritis	3	Rate	2009	0.0123462	0.0153283	0.00993799
1	Deaths	1	Global	3	Both	10	25-29 years	627	Rheumatoid arthritis	1	Number	2009	96.6581	117.243	81.9563
1	Deaths	1	Global	3	Both	10	25-29 years	627	Rheumatoid arthritis	2	Percent	2009	0.00010459	0.000126111	8.84845e-05
1	Deaths	1	Global	3	Both	10	25-29 years	627	Rheumatoid arthritis	3	Rate	2009	0.0178166	0.0216109	0.0151067
1	Deaths	1	Global	3	Both	11	30-34 years	627	Rheumatoid arthritis	1	Number	2009	144.12	171.731	120.528
1	Deaths	1	Global	3	Both	11	30-34 years	627	Rheumatoid arthritis	2	Percent	2009	0.000135023	0.00016122	0.000113484
1	Deaths	1	Global	3	Both	11	30-34 years	627	Rheumatoid arthritis	3	Rate	2009	0.0286465	0.0341346	0.0239572
1	Deaths	1	Global	3	Both	12	35-39 years	627	Rheumatoid arthritis	1	Number	2009	240.284	273.419	196.036
1	Deaths	1	Global	3	Both	12	35-39 years	627	Rheumatoid arthritis	2	Percent	2009	0.0001851	0.000214802	0.000151826
1	Deaths	1	Global	3	Both	12	35-39 years	627	Rheumatoid arthritis	3	Rate	2009	0.0487588	0.0554826	0.0397799
1	Deaths	1	Global	3	Both	13	40-44 years	627	Rheumatoid arthritis	1	Number	2009	400.736	458.233	325.878
1	Deaths	1	Global	3	Both	13	40-44 years	627	Rheumatoid arthritis	2	Percent	2009	0.000256909	0.00029512	0.00020875
1	Deaths	1	Global	3	Both	13	40-44 years	627	Rheumatoid arthritis	3	Rate	2009	0.0871668	0.0996734	0.0708839
1	Deaths	1	Global	3	Both	14	45-49 years	627	Rheumatoid arthritis	1	Number	2009	628.402	711.251	527.727
1	Deaths	1	Global	3	Both	14	45-49 years	627	Rheumatoid arthritis	2	Percent	2009	0.000332648	0.000375933	0.000281074
1	Deaths	1	Global	3	Both	14	45-49 years	627	Rheumatoid arthritis	3	Rate	2009	0.158535	0.179436	0.133137
1	Deaths	1	Global	3	Both	15	50-54 years	627	Rheumatoid arthritis	1	Number	2009	988.641	1098.93	835.126
1	Deaths	1	Global	3	Both	15	50-54 years	627	Rheumatoid arthritis	2	Percent	2009	0.000424036	0.000472122	0.000359653
1	Deaths	1	Global	3	Both	15	50-54 years	627	Rheumatoid arthritis	3	Rate	2009	0.292475	0.325103	0.24706
1	Deaths	1	Global	3	Both	16	55-59 years	627	Rheumatoid arthritis	1	Number	2009	1554.59	1744.22	1324.79
1	Deaths	1	Global	3	Both	16	55-59 years	627	Rheumatoid arthritis	2	Percent	2009	0.000541296	0.000603785	0.000467421
1	Deaths	1	Global	3	Both	16	55-59 years	627	Rheumatoid arthritis	3	Rate	2009	0.536084	0.601475	0.456839
1	Deaths	1	Global	3	Both	17	60-64 years	627	Rheumatoid arthritis	1	Number	2009	2455.04	2802.08	2020.99
1	Deaths	1	Global	3	Both	17	60-64 years	627	Rheumatoid arthritis	2	Percent	2009	0.000717765	0.0008188	0.000591982
1	Deaths	1	Global	3	Both	17	60-64 years	627	Rheumatoid arthritis	3	Rate	2009	1.07554	1.22757	0.885382
1	Deaths	1	Global	3	Both	18	65-69 years	627	Rheumatoid arthritis	1	Number	2009	3444.89	4079.84	2817.88
1	Deaths	1	Global	3	Both	18	65-69 years	627	Rheumatoid arthritis	2	Percent	2009	0.000852279	0.00100469	0.000709352
1	Deaths	1	Global	3	Both	18	65-69 years	627	Rheumatoid arthritis	3	Rate	2009	1.95678	2.31745	1.60062
1	Deaths	1	Global	3	Both	19	70-74 years	627	Rheumatoid arthritis	1	Number	2009	4639.32	5524.3	3746.54
1	Deaths	1	Global	3	Both	19	70-74 years	627	Rheumatoid arthritis	2	Percent	2009	0.000904881	0.00107536	0.000730912
1	Deaths	1	Global	3	Both	19	70-74 years	627	Rheumatoid arthritis	3	Rate	2009	3.25045	3.87049	2.62494
1	Deaths	1	Global	3	Both	20	75-79 years	627	Rheumatoid arthritis	1	Number	2009	5337.39	6051.57	4419.64
1	Deaths	1	Global	3	Both	20	75-79 years	627	Rheumatoid arthritis	2	Percent	2009	0.000948183	0.0010779	0.000788631
1	Deaths	1	Global	3	Both	20	75-79 years	627	Rheumatoid arthritis	3	Rate	2009	5.25018	5.95268	4.34742
1	Deaths	1	Global	3	Both	30	80-84 years	627	Rheumatoid arthritis	1	Number	2009	4483.02	5249.21	3578.98
1	Deaths	1	Global	3	Both	30	80-84 years	627	Rheumatoid arthritis	2	Percent	2009	0.000812623	0.000950764	0.000648664
1	Deaths	1	Global	3	Both	30	80-84 years	627	Rheumatoid arthritis	3	Rate	2009	7.14532	8.36652	5.7044
1	Deaths	1	Global	3	Both	31	85-89 years	627	Rheumatoid arthritis	1	Number	2009	3165.14	3597.4	2509.95
1	Deaths	1	Global	3	Both	31	85-89 years	627	Rheumatoid arthritis	2	Percent	2009	0.000770478	0.000875974	0.000611954
1	Deaths	1	Global	3	Both	31	85-89 years	627	Rheumatoid arthritis	3	Rate	2009	10.7497	12.2178	8.52449
1	Deaths	1	Global	3	Both	32	90-94 years	627	Rheumatoid arthritis	1	Number	2009	1306.06	1504.46	1000.2
1	Deaths	1	Global	3	Both	32	90-94 years	627	Rheumatoid arthritis	2	Percent	2009	0.000647184	0.000742669	0.000496294
1	Deaths	1	Global	3	Both	32	90-94 years	627	Rheumatoid arthritis	3	Rate	2009	13.5986	15.6642	10.414
1	Deaths	1	Global	3	Both	235	95+ years	627	Rheumatoid arthritis	1	Number	2009	464.429	534.656	350.902
1	Deaths	1	Global	3	Both	235	95+ years	627	Rheumatoid arthritis	2	Percent	2009	0.000555192	0.000638605	0.000420316
1	Deaths	1	Global	3	Both	235	95+ years	627	Rheumatoid arthritis	3	Rate	2009	15.5939	17.9519	11.7821
1	Deaths	1	Global	3	Both	6	5-9 years	627	Rheumatoid arthritis	1	Number	2012	19.3988	24.7972	15.9807
1	Deaths	1	Global	3	Both	6	5-9 years	627	Rheumatoid arthritis	2	Percent	2012	3.75554e-05	4.76377e-05	3.09564e-05
1	Deaths	1	Global	3	Both	6	5-9 years	627	Rheumatoid arthritis	3	Rate	2012	0.0030854	0.00394403	0.00254174
1	Deaths	1	Global	3	Both	7	10-14 years	627	Rheumatoid arthritis	1	Number	2012	30.7664	39.4811	24.8329
1	Deaths	1	Global	3	Both	7	10-14 years	627	Rheumatoid arthritis	2	Percent	2012	8.51181e-05	0.000108167	6.93747e-05
1	Deaths	1	Global	3	Both	7	10-14 years	627	Rheumatoid arthritis	3	Rate	2012	0.00507103	0.00650743	0.00409306
1	Deaths	1	Global	3	Both	8	15-19 years	627	Rheumatoid arthritis	1	Number	2012	48.269	61.2143	39.3135
1	Deaths	1	Global	3	Both	8	15-19 years	627	Rheumatoid arthritis	2	Percent	2012	7.77096e-05	9.73731e-05	6.4022e-05
1	Deaths	1	Global	3	Both	8	15-19 years	627	Rheumatoid arthritis	3	Rate	2012	0.00798804	0.0101303	0.00650598
1	Deaths	1	Global	3	Both	9	20-24 years	627	Rheumatoid arthritis	1	Number	2012	62.411	81.7029	52.0346
1	Deaths	1	Global	3	Both	9	20-24 years	627	Rheumatoid arthritis	2	Percent	2012	7.66908e-05	9.91127e-05	6.3393e-05
1	Deaths	1	Global	3	Both	9	20-24 years	627	Rheumatoid arthritis	3	Rate	2012	0.0101701	0.0133137	0.00847919
1	Deaths	1	Global	3	Both	10	25-29 years	627	Rheumatoid arthritis	1	Number	2012	87.6113	107.937	72.5912
1	Deaths	1	Global	3	Both	10	25-29 years	627	Rheumatoid arthritis	2	Percent	2012	9.94534e-05	0.000121931	8.30223e-05
1	Deaths	1	Global	3	Both	10	25-29 years	627	Rheumatoid arthritis	3	Rate	2012	0.0150852	0.018585	0.012499
1	Deaths	1	Global	3	Both	11	30-34 years	627	Rheumatoid arthritis	1	Number	2012	125.208	150.476	106.548
1	Deaths	1	Global	3	Both	11	30-34 years	627	Rheumatoid arthritis	2	Percent	2012	0.000126548	0.000152083	0.000108729
1	Deaths	1	Global	3	Both	11	30-34 years	627	Rheumatoid arthritis	3	Rate	2012	0.0239897	0.028831	0.0204144
1	Deaths	1	Global	3	Both	12	35-39 years	627	Rheumatoid arthritis	1	Number	2012	210.892	249.795	176.274
1	Deaths	1	Global	3	Both	12	35-39 years	627	Rheumatoid arthritis	2	Percent	2012	0.000178587	0.000210726	0.000150887
1	Deaths	1	Global	3	Both	12	35-39 years	627	Rheumatoid arthritis	3	Rate	2012	0.0425569	0.0504073	0.0355712
1	Deaths	1	Global	3	Both	13	40-44 years	627	Rheumatoid arthritis	1	Number	2012	356.084	416.801	294.938
1	Deaths	1	Global	3	Both	13	40-44 years	627	Rheumatoid arthritis	2	Percent	2012	0.000239689	0.000279901	0.000198682
1	Deaths	1	Global	3	Both	13	40-44 years	627	Rheumatoid arthritis	3	Rate	2012	0.0749359	0.0877134	0.062068
1	Deaths	1	Global	3	Both	14	45-49 years	627	Rheumatoid arthritis	1	Number	2012	648.249	748.522	536.46
1	Deaths	1	Global	3	Both	14	45-49 years	627	Rheumatoid arthritis	2	Percent	2012	0.000338422	0.000386611	0.000281925
1	Deaths	1	Global	3	Both	14	45-49 years	627	Rheumatoid arthritis	3	Rate	2012	0.149358	0.172461	0.123602
1	Deaths	1	Global	3	Both	15	50-54 years	627	Rheumatoid arthritis	1	Number	2012	921.073	1039.16	791.371
1	Deaths	1	Global	3	Both	15	50-54 years	627	Rheumatoid arthritis	2	Percent	2012	0.00040096	0.000448228	0.000347408
1	Deaths	1	Global	3	Both	15	50-54 years	627	Rheumatoid arthritis	3	Rate	2012	0.258513	0.291657	0.22211
1	Deaths	1	Global	3	Both	16	55-59 years	627	Rheumatoid arthritis	1	Number	2012	1584.18	1789.39	1341.78
1	Deaths	1	Global	3	Both	16	55-59 years	627	Rheumatoid arthritis	2	Percent	2012	0.000526182	0.000590842	0.000449548
1	Deaths	1	Global	3	Both	16	55-59 years	627	Rheumatoid arthritis	3	Rate	2012	0.499856	0.564606	0.42337
1	Deaths	1	Global	3	Both	17	60-64 years	627	Rheumatoid arthritis	1	Number	2012	2617.08	3015.51	2201.9
1	Deaths	1	Global	3	Both	17	60-64 years	627	Rheumatoid arthritis	2	Percent	2012	0.000697987	0.000798649	0.000587135
1	Deaths	1	Global	3	Both	17	60-64 years	627	Rheumatoid arthritis	3	Rate	2012	1.00483	1.1578	0.845416
1	Deaths	1	Global	3	Both	18	65-69 years	627	Rheumatoid arthritis	1	Number	2012	3555.49	4256.1	2932.03
1	Deaths	1	Global	3	Both	18	65-69 years	627	Rheumatoid arthritis	2	Percent	2012	0.000859748	0.00101623	0.000719226
1	Deaths	1	Global	3	Both	18	65-69 years	627	Rheumatoid arthritis	3	Rate	2012	1.8689	2.23717	1.54119
1	Deaths	1	Global	3	Both	19	70-74 years	627	Rheumatoid arthritis	1	Number	2012	4669.88	5530.16	3799.79
1	Deaths	1	Global	3	Both	19	70-74 years	627	Rheumatoid arthritis	2	Percent	2012	0.000910411	0.00107705	0.000742722
1	Deaths	1	Global	3	Both	19	70-74 years	627	Rheumatoid arthritis	3	Rate	2012	3.10613	3.67834	2.5274
1	Deaths	1	Global	3	Both	20	75-79 years	627	Rheumatoid arthritis	1	Number	2012	5491.86	6278.21	4596.14
1	Deaths	1	Global	3	Both	20	75-79 years	627	Rheumatoid arthritis	2	Percent	2012	0.000953926	0.00108372	0.000799202
1	Deaths	1	Global	3	Both	20	75-79 years	627	Rheumatoid arthritis	3	Rate	2012	4.99522	5.71046	4.1805
1	Deaths	1	Global	3	Both	30	80-84 years	627	Rheumatoid arthritis	1	Number	2012	4761	5663.01	3792.03
1	Deaths	1	Global	3	Both	30	80-84 years	627	Rheumatoid arthritis	2	Percent	2012	0.000819723	0.000970116	0.00065347
1	Deaths	1	Global	3	Both	30	80-84 years	627	Rheumatoid arthritis	3	Rate	2012	6.93117	8.24433	5.52052
1	Deaths	1	Global	3	Both	31	85-89 years	627	Rheumatoid arthritis	1	Number	2012	3443.23	3963.78	2711.67
1	Deaths	1	Global	3	Both	31	85-89 years	627	Rheumatoid arthritis	2	Percent	2012	0.000758316	0.000872024	0.000595542
1	Deaths	1	Global	3	Both	31	85-89 years	627	Rheumatoid arthritis	3	Rate	2012	10.1894	11.7298	8.02451
1	Deaths	1	Global	3	Both	32	90-94 years	627	Rheumatoid arthritis	1	Number	2012	1518.56	1761.53	1163.52
1	Deaths	1	Global	3	Both	32	90-94 years	627	Rheumatoid arthritis	2	Percent	2012	0.000636863	0.000735641	0.000487414
1	Deaths	1	Global	3	Both	32	90-94 years	627	Rheumatoid arthritis	3	Rate	2012	12.9558	15.0287	9.92671
1	Deaths	1	Global	3	Both	235	95+ years	627	Rheumatoid arthritis	1	Number	2012	520.137	603.8	388.646
1	Deaths	1	Global	3	Both	235	95+ years	627	Rheumatoid arthritis	2	Percent	2012	0.000560177	0.000648733	0.000419359
1	Deaths	1	Global	3	Both	235	95+ years	627	Rheumatoid arthritis	3	Rate	2012	15.4085	17.887	11.5132
1	Deaths	1	Global	3	Both	6	5-9 years	627	Rheumatoid arthritis	1	Number	2015	18.1209	22.8413	15.0138
1	Deaths	1	Global	3	Both	6	5-9 years	627	Rheumatoid arthritis	2	Percent	2015	3.91313e-05	4.89302e-05	3.22446e-05
1	Deaths	1	Global	3	Both	6	5-9 years	627	Rheumatoid arthritis	3	Rate	2015	0.00276925	0.00349061	0.00229442
1	Deaths	1	Global	3	Both	7	10-14 years	627	Rheumatoid arthritis	1	Number	2015	28.02	35.7937	22.4212
1	Deaths	1	Global	3	Both	7	10-14 years	627	Rheumatoid arthritis	2	Percent	2015	8.09373e-05	0.000103354	6.56992e-05
1	Deaths	1	Global	3	Both	7	10-14 years	627	Rheumatoid arthritis	3	Rate	2015	0.00452709	0.00578306	0.00362252
1	Deaths	1	Global	3	Both	8	15-19 years	627	Rheumatoid arthritis	1	Number	2015	43.6855	54.7843	35.7471
1	Deaths	1	Global	3	Both	8	15-19 years	627	Rheumatoid arthritis	2	Percent	2015	7.26164e-05	9.01626e-05	6.0166e-05
1	Deaths	1	Global	3	Both	8	15-19 years	627	Rheumatoid arthritis	3	Rate	2015	0.00724783	0.00908923	0.00593077
1	Deaths	1	Global	3	Both	9	20-24 years	627	Rheumatoid arthritis	1	Number	2015	55.8216	71.5123	46.7055
1	Deaths	1	Global	3	Both	9	20-24 years	627	Rheumatoid arthritis	2	Percent	2015	7.39384e-05	9.33809e-05	6.15726e-05
1	Deaths	1	Global	3	Both	9	20-24 years	627	Rheumatoid arthritis	3	Rate	2015	0.00930129	0.0119157	0.00778232
1	Deaths	1	Global	3	Both	10	25-29 years	627	Rheumatoid arthritis	1	Number	2015	86.4951	105.603	70.6675
1	Deaths	1	Global	3	Both	10	25-29 years	627	Rheumatoid arthritis	2	Percent	2015	0.000104607	0.00012848	8.61621e-05
1	Deaths	1	Global	3	Both	10	25-29 years	627	Rheumatoid arthritis	3	Rate	2015	0.0142626	0.0174135	0.0116527
1	Deaths	1	Global	3	Both	11	30-34 years	627	Rheumatoid arthritis	1	Number	2015	123.235	147.975	105.565
1	Deaths	1	Global	3	Both	11	30-34 years	627	Rheumatoid arthritis	2	Percent	2015	0.000129336	0.000153758	0.000109683
1	Deaths	1	Global	3	Both	11	30-34 years	627	Rheumatoid arthritis	3	Rate	2015	0.0222989	0.0267756	0.0191015
1	Deaths	1	Global	3	Both	12	35-39 years	627	Rheumatoid arthritis	1	Number	2015	198.669	232.058	168.394
1	Deaths	1	Global	3	Both	12	35-39 years	627	Rheumatoid arthritis	2	Percent	2015	0.000174524	0.000204544	0.000149297
1	Deaths	1	Global	3	Both	12	35-39 years	627	Rheumatoid arthritis	3	Rate	2015	0.0393992	0.0460207	0.0333952
1	Deaths	1	Global	3	Both	13	40-44 years	627	Rheumatoid arthritis	1	Number	2015	345.306	397.91	291.571
1	Deaths	1	Global	3	Both	13	40-44 years	627	Rheumatoid arthritis	2	Percent	2015	0.000240158	0.000276042	0.00020195
1	Deaths	1	Global	3	Both	13	40-44 years	627	Rheumatoid arthritis	3	Rate	2015	0.0712763	0.0821346	0.0601846
1	Deaths	1	Global	3	Both	14	45-49 years	627	Rheumatoid arthritis	1	Number	2015	611.749	715.415	517.463
1	Deaths	1	Global	3	Both	14	45-49 years	627	Rheumatoid arthritis	2	Percent	2015	0.000330704	0.000383596	0.000280224
1	Deaths	1	Global	3	Both	14	45-49 years	627	Rheumatoid arthritis	3	Rate	2015	0.135063	0.15795	0.114246
1	Deaths	1	Global	3	Both	15	50-54 years	627	Rheumatoid arthritis	1	Number	2015	1010.85	1158.53	875.619
1	Deaths	1	Global	3	Both	15	50-54 years	627	Rheumatoid arthritis	2	Percent	2015	0.000410617	0.000468793	0.000352526
1	Deaths	1	Global	3	Both	15	50-54 years	627	Rheumatoid arthritis	3	Rate	2015	0.253957	0.291058	0.219982
1	Deaths	1	Global	3	Both	16	55-59 years	627	Rheumatoid arthritis	1	Number	2015	1532.44	1714.92	1336.08
1	Deaths	1	Global	3	Both	16	55-59 years	627	Rheumatoid arthritis	2	Percent	2015	0.000501627	0.000562119	0.000440061
1	Deaths	1	Global	3	Both	16	55-59 years	627	Rheumatoid arthritis	3	Rate	2015	0.465494	0.520924	0.405848
1	Deaths	1	Global	3	Both	17	60-64 years	627	Rheumatoid arthritis	1	Number	2015	2780.73	3229.03	2356.77
1	Deaths	1	Global	3	Both	17	60-64 years	627	Rheumatoid arthritis	2	Percent	2015	0.000695235	0.000807175	0.000586427
1	Deaths	1	Global	3	Both	17	60-64 years	627	Rheumatoid arthritis	3	Rate	2015	0.957104	1.11141	0.811183
1	Deaths	1	Global	3	Both	18	65-69 years	627	Rheumatoid arthritis	1	Number	2015	3751.23	4487.96	3137.58
1	Deaths	1	Global	3	Both	18	65-69 years	627	Rheumatoid arthritis	2	Percent	2015	0.000840504	0.00100426	0.000705007
1	Deaths	1	Global	3	Both	18	65-69 years	627	Rheumatoid arthritis	3	Rate	2015	1.69761	2.03101	1.4199
1	Deaths	1	Global	3	Both	19	70-74 years	627	Rheumatoid arthritis	1	Number	2015	4610.48	5547.39	3819.3
1	Deaths	1	Global	3	Both	19	70-74 years	627	Rheumatoid arthritis	2	Percent	2015	0.000921305	0.00109486	0.00076659
1	Deaths	1	Global	3	Both	19	70-74 years	627	Rheumatoid arthritis	3	Rate	2015	2.9392	3.53649	2.43482
1	Deaths	1	Global	3	Both	20	75-79 years	627	Rheumatoid arthritis	1	Number	2015	5748	6610.65	4814.6
1	Deaths	1	Global	3	Both	20	75-79 years	627	Rheumatoid arthritis	2	Percent	2015	0.00096489	0.00110142	0.000806742
1	Deaths	1	Global	3	Both	20	75-79 years	627	Rheumatoid arthritis	3	Rate	2015	4.8392	5.56546	4.05338
1	Deaths	1	Global	3	Both	30	80-84 years	627	Rheumatoid arthritis	1	Number	2015	5276.37	6305.05	4244.13
1	Deaths	1	Global	3	Both	30	80-84 years	627	Rheumatoid arthritis	2	Percent	2015	0.000857492	0.00102002	0.000683015
1	Deaths	1	Global	3	Both	30	80-84 years	627	Rheumatoid arthritis	3	Rate	2015	7.10799	8.49376	5.71742
1	Deaths	1	Global	3	Both	31	85-89 years	627	Rheumatoid arthritis	1	Number	2015	3971.03	4718.5	3088
1	Deaths	1	Global	3	Both	31	85-89 years	627	Rheumatoid arthritis	2	Percent	2015	0.000772863	0.000920301	0.000605559
1	Deaths	1	Global	3	Both	31	85-89 years	627	Rheumatoid arthritis	3	Rate	2015	10.43	12.3932	8.11069
1	Deaths	1	Global	3	Both	32	90-94 years	627	Rheumatoid arthritis	1	Number	2015	1835.06	2151.37	1391.54
1	Deaths	1	Global	3	Both	32	90-94 years	627	Rheumatoid arthritis	2	Percent	2015	0.000640783	0.000755481	0.000486301
1	Deaths	1	Global	3	Both	32	90-94 years	627	Rheumatoid arthritis	3	Rate	2015	13.2101	15.4872	10.0174
1	Deaths	1	Global	3	Both	235	95+ years	627	Rheumatoid arthritis	1	Number	2015	629.94	737.427	464.595
1	Deaths	1	Global	3	Both	235	95+ years	627	Rheumatoid arthritis	2	Percent	2015	0.000585672	0.000683936	0.000431609
1	Deaths	1	Global	3	Both	235	95+ years	627	Rheumatoid arthritis	3	Rate	2015	16.257	19.0309	11.9899
1	Deaths	1	Global	3	Both	6	5-9 years	627	Rheumatoid arthritis	1	Number	2010	21.3181	26.8198	17.4631
1	Deaths	1	Global	3	Both	6	5-9 years	627	Rheumatoid arthritis	2	Percent	2010	3.89266e-05	4.89182e-05	3.2241e-05
1	Deaths	1	Global	3	Both	6	5-9 years	627	Rheumatoid arthritis	3	Rate	2010	0.00347114	0.00436696	0.00284344
1	Deaths	1	Global	3	Both	7	10-14 years	627	Rheumatoid arthritis	1	Number	2010	34.2586	43.6349	27.6765
1	Deaths	1	Global	3	Both	7	10-14 years	627	Rheumatoid arthritis	2	Percent	2010	8.38206e-05	0.000106418	6.88364e-05
1	Deaths	1	Global	3	Both	7	10-14 years	627	Rheumatoid arthritis	3	Rate	2010	0.00567279	0.00722538	0.00458288
1	Deaths	1	Global	3	Both	8	15-19 years	627	Rheumatoid arthritis	1	Number	2010	53.6757	67.4755	43.5295
1	Deaths	1	Global	3	Both	8	15-19 years	627	Rheumatoid arthritis	2	Percent	2010	8.31461e-05	0.000104168	6.82732e-05
1	Deaths	1	Global	3	Both	8	15-19 years	627	Rheumatoid arthritis	3	Rate	2010	0.00880002	0.0110625	0.00713656
1	Deaths	1	Global	3	Both	9	20-24 years	627	Rheumatoid arthritis	1	Number	2010	73.4249	92.6261	60.8218
1	Deaths	1	Global	3	Both	9	20-24 years	627	Rheumatoid arthritis	2	Percent	2010	8.59976e-05	0.000106969	7.16412e-05
1	Deaths	1	Global	3	Both	9	20-24 years	627	Rheumatoid arthritis	3	Rate	2010	0.0119464	0.0150704	0.00989582
1	Deaths	1	Global	3	Both	10	25-29 years	627	Rheumatoid arthritis	1	Number	2010	95.9261	115.044	81.9188
1	Deaths	1	Global	3	Both	10	25-29 years	627	Rheumatoid arthritis	2	Percent	2010	0.000102969	0.000124516	8.8028e-05
1	Deaths	1	Global	3	Both	10	25-29 years	627	Rheumatoid arthritis	3	Rate	2010	0.0173008	0.0207487	0.0147745
1	Deaths	1	Global	3	Both	11	30-34 years	627	Rheumatoid arthritis	1	Number	2010	139.926	168.248	118.727
1	Deaths	1	Global	3	Both	11	30-34 years	627	Rheumatoid arthritis	2	Percent	2010	0.000132394	0.000157858	0.0001124
1	Deaths	1	Global	3	Both	11	30-34 years	627	Rheumatoid arthritis	3	Rate	2010	0.0275303	0.0331027	0.0233595
1	Deaths	1	Global	3	Both	12	35-39 years	627	Rheumatoid arthritis	1	Number	2010	229.007	267.533	186.352
1	Deaths	1	Global	3	Both	12	35-39 years	627	Rheumatoid arthritis	2	Percent	2010	0.000181075	0.000211752	0.000150683
1	Deaths	1	Global	3	Both	12	35-39 years	627	Rheumatoid arthritis	3	Rate	2010	0.0462872	0.0540742	0.0376657
1	Deaths	1	Global	3	Both	13	40-44 years	627	Rheumatoid arthritis	1	Number	2010	382.271	441.412	315.16
1	Deaths	1	Global	3	Both	13	40-44 years	627	Rheumatoid arthritis	2	Percent	2010	0.00024858	0.000286041	0.000202202
1	Deaths	1	Global	3	Both	13	40-44 years	627	Rheumatoid arthritis	3	Rate	2010	0.0822403	0.0949636	0.0678024
1	Deaths	1	Global	3	Both	14	45-49 years	627	Rheumatoid arthritis	1	Number	2010	638.534	727.716	539.618
1	Deaths	1	Global	3	Both	14	45-49 years	627	Rheumatoid arthritis	2	Percent	2010	0.000333408	0.000377886	0.000284265
1	Deaths	1	Global	3	Both	14	45-49 years	627	Rheumatoid arthritis	3	Rate	2010	0.155398	0.177101	0.131325
1	Deaths	1	Global	3	Both	15	50-54 years	627	Rheumatoid arthritis	1	Number	2010	946.399	1062.99	816.738
1	Deaths	1	Global	3	Both	15	50-54 years	627	Rheumatoid arthritis	2	Percent	2010	0.000408335	0.000456905	0.000352549
1	Deaths	1	Global	3	Both	15	50-54 years	627	Rheumatoid arthritis	3	Rate	2010	0.276916	0.311032	0.238978
1	Deaths	1	Global	3	Both	16	55-59 years	627	Rheumatoid arthritis	1	Number	2010	1575.52	1772.28	1345.35
1	Deaths	1	Global	3	Both	16	55-59 years	627	Rheumatoid arthritis	2	Percent	2010	0.000533099	0.00060033	0.000463823
1	Deaths	1	Global	3	Both	16	55-59 years	627	Rheumatoid arthritis	3	Rate	2010	0.521475	0.5866	0.445293
1	Deaths	1	Global	3	Both	17	60-64 years	627	Rheumatoid arthritis	1	Number	2010	2499.97	2884.85	2105.46
1	Deaths	1	Global	3	Both	17	60-64 years	627	Rheumatoid arthritis	2	Percent	2010	0.000707134	0.000813614	0.000591457
1	Deaths	1	Global	3	Both	17	60-64 years	627	Rheumatoid arthritis	3	Rate	2010	1.04769	1.20899	0.882362
1	Deaths	1	Global	3	Both	18	65-69 years	627	Rheumatoid arthritis	1	Number	2010	3460.94	4099.9	2858.83
1	Deaths	1	Global	3	Both	18	65-69 years	627	Rheumatoid arthritis	2	Percent	2010	0.000852002	0.00100317	0.000710331
1	Deaths	1	Global	3	Both	18	65-69 years	627	Rheumatoid arthritis	3	Rate	2010	1.94391	2.30279	1.60572
1	Deaths	1	Global	3	Both	19	70-74 years	627	Rheumatoid arthritis	1	Number	2010	4645.21	5516.49	3757.54
1	Deaths	1	Global	3	Both	19	70-74 years	627	Rheumatoid arthritis	2	Percent	2010	0.00090032	0.00106552	0.000731701
1	Deaths	1	Global	3	Both	19	70-74 years	627	Rheumatoid arthritis	3	Rate	2010	3.18761	3.7855	2.57848
1	Deaths	1	Global	3	Both	20	75-79 years	627	Rheumatoid arthritis	1	Number	2010	5411.66	6218.86	4513.23
1	Deaths	1	Global	3	Both	20	75-79 years	627	Rheumatoid arthritis	2	Percent	2010	0.00095352	0.00108785	0.000795905
1	Deaths	1	Global	3	Both	20	75-79 years	627	Rheumatoid arthritis	3	Rate	2010	5.20243	5.97843	4.33874
1	Deaths	1	Global	3	Both	30	80-84 years	627	Rheumatoid arthritis	1	Number	2010	4613.51	5444.26	3691.99
1	Deaths	1	Global	3	Both	30	80-84 years	627	Rheumatoid arthritis	2	Percent	2010	0.000811273	0.000952831	0.000649235
1	Deaths	1	Global	3	Both	30	80-84 years	627	Rheumatoid arthritis	3	Rate	2010	7.11631	8.39774	5.69488
1	Deaths	1	Global	3	Both	31	85-89 years	627	Rheumatoid arthritis	1	Number	2010	3272.05	3723.54	2605.88
1	Deaths	1	Global	3	Both	31	85-89 years	627	Rheumatoid arthritis	2	Percent	2010	0.000764976	0.000872808	0.000607604
1	Deaths	1	Global	3	Both	31	85-89 years	627	Rheumatoid arthritis	3	Rate	2010	10.5774	12.0369	8.4239
1	Deaths	1	Global	3	Both	32	90-94 years	627	Rheumatoid arthritis	1	Number	2010	1374.1	1569.61	1059.6
1	Deaths	1	Global	3	Both	32	90-94 years	627	Rheumatoid arthritis	2	Percent	2010	0.000649672	0.000744982	0.000499552
1	Deaths	1	Global	3	Both	32	90-94 years	627	Rheumatoid arthritis	3	Rate	2010	13.4657	15.3816	10.3837
1	Deaths	1	Global	3	Both	235	95+ years	627	Rheumatoid arthritis	1	Number	2010	490.175	563.082	372.49
1	Deaths	1	Global	3	Both	235	95+ years	627	Rheumatoid arthritis	2	Percent	2010	0.000560684	0.000644054	0.00042422
1	Deaths	1	Global	3	Both	235	95+ years	627	Rheumatoid arthritis	3	Rate	2010	15.6737	18.0049	11.9106
1	Deaths	1	Global	3	Both	6	5-9 years	627	Rheumatoid arthritis	1	Number	2014	18.6772	23.7812	15.5621
1	Deaths	1	Global	3	Both	6	5-9 years	627	Rheumatoid arthritis	2	Percent	2014	3.94496e-05	4.95653e-05	3.27143e-05
1	Deaths	1	Global	3	Both	6	5-9 years	627	Rheumatoid arthritis	3	Rate	2014	0.00288842	0.00367776	0.00240668
1	Deaths	1	Global	3	Both	7	10-14 years	627	Rheumatoid arthritis	1	Number	2014	28.9529	36.9287	23.366
1	Deaths	1	Global	3	Both	7	10-14 years	627	Rheumatoid arthritis	2	Percent	2014	8.26791e-05	0.000104619	6.69485e-05
1	Deaths	1	Global	3	Both	7	10-14 years	627	Rheumatoid arthritis	3	Rate	2014	0.00471737	0.00601689	0.00380709
1	Deaths	1	Global	3	Both	8	15-19 years	627	Rheumatoid arthritis	1	Number	2014	45.2583	56.5111	37.1619
1	Deaths	1	Global	3	Both	8	15-19 years	627	Rheumatoid arthritis	2	Percent	2014	7.24151e-05	9.07053e-05	5.93949e-05
1	Deaths	1	Global	3	Both	8	15-19 years	627	Rheumatoid arthritis	3	Rate	2014	0.00751171	0.00937939	0.00616793
1	Deaths	1	Global	3	Both	9	20-24 years	627	Rheumatoid arthritis	1	Number	2014	58.337	74.3923	48.2687
1	Deaths	1	Global	3	Both	9	20-24 years	627	Rheumatoid arthritis	2	Percent	2014	7.47687e-05	9.56009e-05	6.23209e-05
1	Deaths	1	Global	3	Both	9	20-24 years	627	Rheumatoid arthritis	3	Rate	2014	0.00964497	0.0122994	0.00798036
1	Deaths	1	Global	3	Both	10	25-29 years	627	Rheumatoid arthritis	1	Number	2014	88.5089	106.091	72.1023
1	Deaths	1	Global	3	Both	10	25-29 years	627	Rheumatoid arthritis	2	Percent	2014	0.000104228	0.000126041	8.59056e-05
1	Deaths	1	Global	3	Both	10	25-29 years	627	Rheumatoid arthritis	3	Rate	2014	0.0147203	0.0176445	0.0119917
1	Deaths	1	Global	3	Both	11	30-34 years	627	Rheumatoid arthritis	1	Number	2014	123.181	147.797	104.94
1	Deaths	1	Global	3	Both	11	30-34 years	627	Rheumatoid arthritis	2	Percent	2014	0.000127716	0.000152399	0.000107694
1	Deaths	1	Global	3	Both	11	30-34 years	627	Rheumatoid arthritis	3	Rate	2014	0.0227654	0.0273147	0.0193943
1	Deaths	1	Global	3	Both	12	35-39 years	627	Rheumatoid arthritis	1	Number	2014	201.569	236.376	170.168
1	Deaths	1	Global	3	Both	12	35-39 years	627	Rheumatoid arthritis	2	Percent	2014	0.000174992	0.000203353	0.000147708
1	Deaths	1	Global	3	Both	12	35-39 years	627	Rheumatoid arthritis	3	Rate	2014	0.0403679	0.0473386	0.0340793
1	Deaths	1	Global	3	Both	13	40-44 years	627	Rheumatoid arthritis	1	Number	2014	352.171	409.396	289.718
1	Deaths	1	Global	3	Both	13	40-44 years	627	Rheumatoid arthritis	2	Percent	2014	0.00024079	0.000277546	0.000200081
1	Deaths	1	Global	3	Both	13	40-44 years	627	Rheumatoid arthritis	3	Rate	2014	0.0729791	0.0848375	0.0600372
1	Deaths	1	Global	3	Both	14	45-49 years	627	Rheumatoid arthritis	1	Number	2014	628.911	720.808	526.954
1	Deaths	1	Global	3	Both	14	45-49 years	627	Rheumatoid arthritis	2	Percent	2014	0.000337049	0.000385421	0.000281688
1	Deaths	1	Global	3	Both	14	45-49 years	627	Rheumatoid arthritis	3	Rate	2014	0.140454	0.160978	0.117685
1	Deaths	1	Global	3	Both	15	50-54 years	627	Rheumatoid arthritis	1	Number	2014	980.838	1118.43	841.127
1	Deaths	1	Global	3	Both	15	50-54 years	627	Rheumatoid arthritis	2	Percent	2014	0.000407573	0.000460243	0.000345452
1	Deaths	1	Global	3	Both	15	50-54 years	627	Rheumatoid arthritis	3	Rate	2014	0.255659	0.291523	0.219243
1	Deaths	1	Global	3	Both	16	55-59 years	627	Rheumatoid arthritis	1	Number	2014	1547.84	1736.51	1336.68
1	Deaths	1	Global	3	Both	16	55-59 years	627	Rheumatoid arthritis	2	Percent	2014	0.000513788	0.000574854	0.000446432
1	Deaths	1	Global	3	Both	16	55-59 years	627	Rheumatoid arthritis	3	Rate	2014	0.475521	0.533483	0.410648
1	Deaths	1	Global	3	Both	17	60-64 years	627	Rheumatoid arthritis	1	Number	2014	2680.77	3109.09	2224.15
1	Deaths	1	Global	3	Both	17	60-64 years	627	Rheumatoid arthritis	2	Percent	2014	0.000695911	0.000805784	0.000581825
1	Deaths	1	Global	3	Both	17	60-64 years	627	Rheumatoid arthritis	3	Rate	2014	0.961186	1.11476	0.797466
1	Deaths	1	Global	3	Both	18	65-69 years	627	Rheumatoid arthritis	1	Number	2014	3606.32	4349.79	2976.54
1	Deaths	1	Global	3	Both	18	65-69 years	627	Rheumatoid arthritis	2	Percent	2014	0.000840275	0.00100851	0.000698708
1	Deaths	1	Global	3	Both	18	65-69 years	627	Rheumatoid arthritis	3	Rate	2014	1.70809	2.06023	1.40981
1	Deaths	1	Global	3	Both	19	70-74 years	627	Rheumatoid arthritis	1	Number	2014	4561.98	5491.82	3730.89
1	Deaths	1	Global	3	Both	19	70-74 years	627	Rheumatoid arthritis	2	Percent	2014	0.000911611	0.00108363	0.000744995
1	Deaths	1	Global	3	Both	19	70-74 years	627	Rheumatoid arthritis	3	Rate	2014	2.94956	3.55075	2.41221
1	Deaths	1	Global	3	Both	20	75-79 years	627	Rheumatoid arthritis	1	Number	2014	5666.75	6428.1	4694.41
1	Deaths	1	Global	3	Both	20	75-79 years	627	Rheumatoid arthritis	2	Percent	2014	0.000958884	0.00108902	0.000800689
1	Deaths	1	Global	3	Both	20	75-79 years	627	Rheumatoid arthritis	3	Rate	2014	4.88709	5.54369	4.04853
1	Deaths	1	Global	3	Both	30	80-84 years	627	Rheumatoid arthritis	1	Number	2014	5184.16	6100.09	4124.04
1	Deaths	1	Global	3	Both	30	80-84 years	627	Rheumatoid arthritis	2	Percent	2014	0.000846857	0.000997079	0.000673641
1	Deaths	1	Global	3	Both	30	80-84 years	627	Rheumatoid arthritis	3	Rate	2014	7.17868	8.44701	5.71071
1	Deaths	1	Global	3	Both	31	85-89 years	627	Rheumatoid arthritis	1	Number	2014	3913.3	4630.59	3033.71
1	Deaths	1	Global	3	Both	31	85-89 years	627	Rheumatoid arthritis	2	Percent	2014	0.000779896	0.000921307	0.000608329
1	Deaths	1	Global	3	Both	31	85-89 years	627	Rheumatoid arthritis	3	Rate	2014	10.6517	12.6041	8.25753
1	Deaths	1	Global	3	Both	32	90-94 years	627	Rheumatoid arthritis	1	Number	2014	1796.84	2119.73	1378.35
1	Deaths	1	Global	3	Both	32	90-94 years	627	Rheumatoid arthritis	2	Percent	2014	0.000651265	0.000768548	0.000495904
1	Deaths	1	Global	3	Both	32	90-94 years	627	Rheumatoid arthritis	3	Rate	2014	13.6045	16.0492	10.436
1	Deaths	1	Global	3	Both	235	95+ years	627	Rheumatoid arthritis	1	Number	2014	603.77	712.705	440.304
1	Deaths	1	Global	3	Both	235	95+ years	627	Rheumatoid arthritis	2	Percent	2014	0.000590696	0.000695657	0.000432499
1	Deaths	1	Global	3	Both	235	95+ years	627	Rheumatoid arthritis	3	Rate	2014	16.5593	19.547	12.076
1	Deaths	1	Global	3	Both	6	5-9 years	627	Rheumatoid arthritis	1	Number	2019	15.8192	19.9698	13.0599
1	Deaths	1	Global	3	Both	6	5-9 years	627	Rheumatoid arthritis	2	Percent	2019	4.07406e-05	5.14314e-05	3.3713e-05
1	Deaths	1	Global	3	Both	6	5-9 years	627	Rheumatoid arthritis	3	Rate	2019	0.00234238	0.00295698	0.00193381
1	Deaths	1	Global	3	Both	7	10-14 years	627	Rheumatoid arthritis	1	Number	2019	25.5695	31.8846	20.4695
1	Deaths	1	Global	3	Both	7	10-14 years	627	Rheumatoid arthritis	2	Percent	2019	8.24027e-05	0.000105328	6.70704e-05
1	Deaths	1	Global	3	Both	7	10-14 years	627	Rheumatoid arthritis	3	Rate	2019	0.00391898	0.00488688	0.00313732
1	Deaths	1	Global	3	Both	8	15-19 years	627	Rheumatoid arthritis	1	Number	2019	39.4151	49.2849	32.2616
1	Deaths	1	Global	3	Both	8	15-19 years	627	Rheumatoid arthritis	2	Percent	2019	7.35075e-05	9.21267e-05	6.03213e-05
1	Deaths	1	Global	3	Both	8	15-19 years	627	Rheumatoid arthritis	3	Rate	2019	0.00644074	0.00805355	0.0052718
1	Deaths	1	Global	3	Both	9	20-24 years	627	Rheumatoid arthritis	1	Number	2019	48.9692	63.5696	39.6821
1	Deaths	1	Global	3	Both	9	20-24 years	627	Rheumatoid arthritis	2	Percent	2019	7.03363e-05	9.06089e-05	5.78873e-05
1	Deaths	1	Global	3	Both	9	20-24 years	627	Rheumatoid arthritis	3	Rate	2019	0.00823117	0.0106853	0.00667012
1	Deaths	1	Global	3	Both	10	25-29 years	627	Rheumatoid arthritis	1	Number	2019	76.0236	93.3045	61.0979
1	Deaths	1	Global	3	Both	10	25-29 years	627	Rheumatoid arthritis	2	Percent	2019	9.87007e-05	0.000121795	8.07533e-05
1	Deaths	1	Global	3	Both	10	25-29 years	627	Rheumatoid arthritis	3	Rate	2019	0.012764	0.0156654	0.010258
1	Deaths	1	Global	3	Both	11	30-34 years	627	Rheumatoid arthritis	1	Number	2019	125.776	152.618	104.857
1	Deaths	1	Global	3	Both	11	30-34 years	627	Rheumatoid arthritis	2	Percent	2019	0.000133714	0.000160871	0.00011329
1	Deaths	1	Global	3	Both	11	30-34 years	627	Rheumatoid arthritis	3	Rate	2019	0.0209955	0.0254762	0.0175035
1	Deaths	1	Global	3	Both	12	35-39 years	627	Rheumatoid arthritis	1	Number	2019	189.972	224.723	157.552
1	Deaths	1	Global	3	Both	12	35-39 years	627	Rheumatoid arthritis	2	Percent	2019	0.000169441	0.000197978	0.000142528
1	Deaths	1	Global	3	Both	12	35-39 years	627	Rheumatoid arthritis	3	Rate	2019	0.0353968	0.0418719	0.0293562
1	Deaths	1	Global	3	Both	13	40-44 years	627	Rheumatoid arthritis	1	Number	2019	314.97	372.924	262.606
1	Deaths	1	Global	3	Both	13	40-44 years	627	Rheumatoid arthritis	2	Percent	2019	0.000223828	0.000263519	0.000187557
1	Deaths	1	Global	3	Both	13	40-44 years	627	Rheumatoid arthritis	3	Rate	2019	0.0643785	0.0762241	0.0536756
1	Deaths	1	Global	3	Both	14	45-49 years	627	Rheumatoid arthritis	1	Number	2019	575.262	673.163	479.441
1	Deaths	1	Global	3	Both	14	45-49 years	627	Rheumatoid arthritis	2	Percent	2019	0.000315996	0.000366433	0.000265648
1	Deaths	1	Global	3	Both	14	45-49 years	627	Rheumatoid arthritis	3	Rate	2019	0.122077	0.142852	0.101742
1	Deaths	1	Global	3	Both	15	50-54 years	627	Rheumatoid arthritis	1	Number	2019	1000.64	1140.37	852.846
1	Deaths	1	Global	3	Both	15	50-54 years	627	Rheumatoid arthritis	2	Percent	2019	0.00040555	0.00045823	0.000346643
1	Deaths	1	Global	3	Both	15	50-54 years	627	Rheumatoid arthritis	3	Rate	2019	0.230217	0.262366	0.196215
1	Deaths	1	Global	3	Both	16	55-59 years	627	Rheumatoid arthritis	1	Number	2019	1650.29	1894.42	1446.26
1	Deaths	1	Global	3	Both	16	55-59 years	627	Rheumatoid arthritis	2	Percent	2019	0.000506845	0.000577617	0.000444915
1	Deaths	1	Global	3	Both	16	55-59 years	627	Rheumatoid arthritis	3	Rate	2019	0.445793	0.511739	0.390678
1	Deaths	1	Global	3	Both	17	60-64 years	627	Rheumatoid arthritis	1	Number	2019	2828.55	3297.64	2397.61
1	Deaths	1	Global	3	Both	17	60-64 years	627	Rheumatoid arthritis	2	Percent	2019	0.000682063	0.000799017	0.000582376
1	Deaths	1	Global	3	Both	17	60-64 years	627	Rheumatoid arthritis	3	Rate	2019	0.905691	1.05589	0.767707
1	Deaths	1	Global	3	Both	18	65-69 years	627	Rheumatoid arthritis	1	Number	2019	4374.24	5184.1	3629.41
1	Deaths	1	Global	3	Both	18	65-69 years	627	Rheumatoid arthritis	2	Percent	2019	0.000846686	0.000999789	0.000719227
1	Deaths	1	Global	3	Both	18	65-69 years	627	Rheumatoid arthritis	3	Rate	2019	1.68864	2.00128	1.40111
1	Deaths	1	Global	3	Both	19	70-74 years	627	Rheumatoid arthritis	1	Number	2019	5394.77	6454.19	4446.3
1	Deaths	1	Global	3	Both	19	70-74 years	627	Rheumatoid arthritis	2	Percent	2019	0.000941657	0.00111144	0.000781553
1	Deaths	1	Global	3	Both	19	70-74 years	627	Rheumatoid arthritis	3	Rate	2019	2.87615	3.44096	2.37048
1	Deaths	1	Global	3	Both	20	75-79 years	627	Rheumatoid arthritis	1	Number	2019	6349.88	7256.74	5300.83
1	Deaths	1	Global	3	Both	20	75-79 years	627	Rheumatoid arthritis	2	Percent	2019	0.00102947	0.00118079	0.000861022
1	Deaths	1	Global	3	Both	20	75-79 years	627	Rheumatoid arthritis	3	Rate	2019	4.97367	5.68399	4.15198
1	Deaths	1	Global	3	Both	30	80-84 years	627	Rheumatoid arthritis	1	Number	2019	5806.27	6850.91	4584.41
1	Deaths	1	Global	3	Both	30	80-84 years	627	Rheumatoid arthritis	2	Percent	2019	0.000877461	0.00103711	0.000695483
1	Deaths	1	Global	3	Both	30	80-84 years	627	Rheumatoid arthritis	3	Rate	2019	6.89605	8.13675	5.44486
1	Deaths	1	Global	3	Both	31	85-89 years	627	Rheumatoid arthritis	1	Number	2019	4471.07	5307.83	3477.51
1	Deaths	1	Global	3	Both	31	85-89 years	627	Rheumatoid arthritis	2	Percent	2019	0.000802298	0.000955784	0.000624297
1	Deaths	1	Global	3	Both	31	85-89 years	627	Rheumatoid arthritis	3	Rate	2019	10.3311	12.2646	8.03532
1	Deaths	1	Global	3	Both	32	90-94 years	627	Rheumatoid arthritis	1	Number	2019	2176.69	2528.92	1655.03
1	Deaths	1	Global	3	Both	32	90-94 years	627	Rheumatoid arthritis	2	Percent	2019	0.000659588	0.000767431	0.000501268
1	Deaths	1	Global	3	Both	32	90-94 years	627	Rheumatoid arthritis	3	Rate	2019	12.9409	15.035	9.8395
1	Deaths	1	Global	3	Both	235	95+ years	627	Rheumatoid arthritis	1	Number	2019	785.803	904.474	576.898
1	Deaths	1	Global	3	Both	235	95+ years	627	Rheumatoid arthritis	2	Percent	2019	0.000579847	0.000667444	0.000426408
1	Deaths	1	Global	3	Both	235	95+ years	627	Rheumatoid arthritis	3	Rate	2019	15.8683	18.2647	11.6497
1	Deaths	1	Global	3	Both	6	5-9 years	627	Rheumatoid arthritis	1	Number	2018	16.4262	20.5279	13.6184
1	Deaths	1	Global	3	Both	6	5-9 years	627	Rheumatoid arthritis	2	Percent	2018	4.03017e-05	5.03823e-05	3.35979e-05
1	Deaths	1	Global	3	Both	6	5-9 years	627	Rheumatoid arthritis	3	Rate	2018	0.00244955	0.00306121	0.00203084
1	Deaths	1	Global	3	Both	7	10-14 years	627	Rheumatoid arthritis	1	Number	2018	26.25	32.6415	20.8635
1	Deaths	1	Global	3	Both	7	10-14 years	627	Rheumatoid arthritis	2	Percent	2018	8.242e-05	0.000104313	6.69742e-05
1	Deaths	1	Global	3	Both	7	10-14 years	627	Rheumatoid arthritis	3	Rate	2018	0.00408179	0.00507565	0.00324421
1	Deaths	1	Global	3	Both	8	15-19 years	627	Rheumatoid arthritis	1	Number	2018	40.6545	50.3832	33.3939
1	Deaths	1	Global	3	Both	8	15-19 years	627	Rheumatoid arthritis	2	Percent	2018	7.28899e-05	9.06071e-05	5.97229e-05
1	Deaths	1	Global	3	Both	8	15-19 years	627	Rheumatoid arthritis	3	Rate	2018	0.00668731	0.0082876	0.00549301
1	Deaths	1	Global	3	Both	9	20-24 years	627	Rheumatoid arthritis	1	Number	2018	50.671	66.0385	41.6205
1	Deaths	1	Global	3	Both	9	20-24 years	627	Rheumatoid arthritis	2	Percent	2018	7.09524e-05	9.20698e-05	5.85327e-05
1	Deaths	1	Global	3	Both	9	20-24 years	627	Rheumatoid arthritis	3	Rate	2018	0.00851846	0.0111019	0.00699696
1	Deaths	1	Global	3	Both	10	25-29 years	627	Rheumatoid arthritis	1	Number	2018	78.9734	96.7859	63.7979
1	Deaths	1	Global	3	Both	10	25-29 years	627	Rheumatoid arthritis	2	Percent	2018	0.0001001	0.000122358	8.09143e-05
1	Deaths	1	Global	3	Both	10	25-29 years	627	Rheumatoid arthritis	3	Rate	2018	0.0131513	0.0161176	0.0106242
1	Deaths	1	Global	3	Both	11	30-34 years	627	Rheumatoid arthritis	1	Number	2018	125.85	150.247	106.07
1	Deaths	1	Global	3	Both	11	30-34 years	627	Rheumatoid arthritis	2	Percent	2018	0.000133218	0.000159162	0.000111655
1	Deaths	1	Global	3	Both	11	30-34 years	627	Rheumatoid arthritis	3	Rate	2018	0.0213182	0.0254509	0.0179675
1	Deaths	1	Global	3	Both	12	35-39 years	627	Rheumatoid arthritis	1	Number	2018	191.951	226.462	160.32
1	Deaths	1	Global	3	Both	12	35-39 years	627	Rheumatoid arthritis	2	Percent	2018	0.000170378	0.000199738	0.000143382
1	Deaths	1	Global	3	Both	12	35-39 years	627	Rheumatoid arthritis	3	Rate	2018	0.0364535	0.0430072	0.0304464
1	Deaths	1	Global	3	Both	13	40-44 years	627	Rheumatoid arthritis	1	Number	2018	321.605	376.469	271.937
1	Deaths	1	Global	3	Both	13	40-44 years	627	Rheumatoid arthritis	2	Percent	2018	0.000226388	0.00026511	0.000188961
1	Deaths	1	Global	3	Both	13	40-44 years	627	Rheumatoid arthritis	3	Rate	2018	0.0661217	0.0774017	0.05591
1	Deaths	1	Global	3	Both	14	45-49 years	627	Rheumatoid arthritis	1	Number	2018	581.909	680.241	484.892
1	Deaths	1	Global	3	Both	14	45-49 years	627	Rheumatoid arthritis	2	Percent	2018	0.000318898	0.000370668	0.000265935
1	Deaths	1	Global	3	Both	14	45-49 years	627	Rheumatoid arthritis	3	Rate	2018	0.12435	0.145363	0.103618
1	Deaths	1	Global	3	Both	15	50-54 years	627	Rheumatoid arthritis	1	Number	2018	1018.15	1143.61	865.68
1	Deaths	1	Global	3	Both	15	50-54 years	627	Rheumatoid arthritis	2	Percent	2018	0.000412159	0.000460894	0.000352894
1	Deaths	1	Global	3	Both	15	50-54 years	627	Rheumatoid arthritis	3	Rate	2018	0.237509	0.266774	0.201941
1	Deaths	1	Global	3	Both	16	55-59 years	627	Rheumatoid arthritis	1	Number	2018	1598.98	1828.04	1376.88
1	Deaths	1	Global	3	Both	16	55-59 years	627	Rheumatoid arthritis	2	Percent	2018	0.000502748	0.000571862	0.000438142
1	Deaths	1	Global	3	Both	16	55-59 years	627	Rheumatoid arthritis	3	Rate	2018	0.449248	0.513604	0.386846
1	Deaths	1	Global	3	Both	17	60-64 years	627	Rheumatoid arthritis	1	Number	2018	2850.11	3339.27	2426.33
1	Deaths	1	Global	3	Both	17	60-64 years	627	Rheumatoid arthritis	2	Percent	2018	0.000690291	0.000803329	0.000587076
1	Deaths	1	Global	3	Both	17	60-64 years	627	Rheumatoid arthritis	3	Rate	2018	0.922306	1.0806	0.78517
1	Deaths	1	Global	3	Both	18	65-69 years	627	Rheumatoid arthritis	1	Number	2018	4303.03	5159.07	3661.91
1	Deaths	1	Global	3	Both	18	65-69 years	627	Rheumatoid arthritis	2	Percent	2018	0.000852535	0.00101659	0.000727273
1	Deaths	1	Global	3	Both	18	65-69 years	627	Rheumatoid arthritis	3	Rate	2018	1.7127	2.05342	1.45752
1	Deaths	1	Global	3	Both	19	70-74 years	627	Rheumatoid arthritis	1	Number	2018	5207.16	6207.07	4296.26
1	Deaths	1	Global	3	Both	19	70-74 years	627	Rheumatoid arthritis	2	Percent	2018	0.000947418	0.00112264	0.000780377
1	Deaths	1	Global	3	Both	19	70-74 years	627	Rheumatoid arthritis	3	Rate	2018	2.94763	3.51365	2.43199
1	Deaths	1	Global	3	Both	20	75-79 years	627	Rheumatoid arthritis	1	Number	2018	6198.59	7097.02	5180.79
1	Deaths	1	Global	3	Both	20	75-79 years	627	Rheumatoid arthritis	2	Percent	2018	0.00101536	0.00115794	0.000853227
1	Deaths	1	Global	3	Both	20	75-79 years	627	Rheumatoid arthritis	3	Rate	2018	4.94018	5.65622	4.12901
1	Deaths	1	Global	3	Both	30	80-84 years	627	Rheumatoid arthritis	1	Number	2018	5745.01	6881.27	4542.91
1	Deaths	1	Global	3	Both	30	80-84 years	627	Rheumatoid arthritis	2	Percent	2018	0.000883692	0.00105329	0.000706138
1	Deaths	1	Global	3	Both	30	80-84 years	627	Rheumatoid arthritis	3	Rate	2018	7.02368	8.41283	5.55402
1	Deaths	1	Global	3	Both	31	85-89 years	627	Rheumatoid arthritis	1	Number	2018	4384.08	5234.29	3441.76
1	Deaths	1	Global	3	Both	31	85-89 years	627	Rheumatoid arthritis	2	Percent	2018	0.000805083	0.00095552	0.000635887
1	Deaths	1	Global	3	Both	31	85-89 years	627	Rheumatoid arthritis	3	Rate	2018	10.4575	12.4855	8.20976
1	Deaths	1	Global	3	Both	32	90-94 years	627	Rheumatoid arthritis	1	Number	2018	2094.82	2418.79	1578.88
1	Deaths	1	Global	3	Both	32	90-94 years	627	Rheumatoid arthritis	2	Percent	2018	0.000660775	0.000759955	0.000501315
1	Deaths	1	Global	3	Both	32	90-94 years	627	Rheumatoid arthritis	3	Rate	2018	13.0569	15.0761	9.84108
1	Deaths	1	Global	3	Both	235	95+ years	627	Rheumatoid arthritis	1	Number	2018	745.298	857.777	556.667
1	Deaths	1	Global	3	Both	235	95+ years	627	Rheumatoid arthritis	2	Percent	2018	0.000578115	0.000662347	0.00042892
1	Deaths	1	Global	3	Both	235	95+ years	627	Rheumatoid arthritis	3	Rate	2018	15.9722	18.3827	11.9297
1	Deaths	1	Global	3	Both	6	5-9 years	627	Rheumatoid arthritis	1	Number	2016	17.7608	22.3708	14.721
1	Deaths	1	Global	3	Both	6	5-9 years	627	Rheumatoid arthritis	2	Percent	2016	3.94372e-05	4.98399e-05	3.28385e-05
1	Deaths	1	Global	3	Both	6	5-9 years	627	Rheumatoid arthritis	3	Rate	2016	0.00268992	0.00338813	0.00222953
1	Deaths	1	Global	3	Both	7	10-14 years	627	Rheumatoid arthritis	1	Number	2016	27.3754	34.0882	21.7885
1	Deaths	1	Global	3	Both	7	10-14 years	627	Rheumatoid arthritis	2	Percent	2016	8.19613e-05	0.000103735	6.67896e-05
1	Deaths	1	Global	3	Both	7	10-14 years	627	Rheumatoid arthritis	3	Rate	2016	0.00437564	0.00544859	0.00348263
1	Deaths	1	Global	3	Both	8	15-19 years	627	Rheumatoid arthritis	1	Number	2016	43.0857	53.8466	35.5291
1	Deaths	1	Global	3	Both	8	15-19 years	627	Rheumatoid arthritis	2	Percent	2016	7.3422e-05	9.26008e-05	6.0653e-05
1	Deaths	1	Global	3	Both	8	15-19 years	627	Rheumatoid arthritis	3	Rate	2016	0.00713835	0.00892121	0.00588639
1	Deaths	1	Global	3	Both	9	20-24 years	627	Rheumatoid arthritis	1	Number	2016	54.5572	70.7911	44.6766
1	Deaths	1	Global	3	Both	9	20-24 years	627	Rheumatoid arthritis	2	Percent	2016	7.30782e-05	9.40104e-05	6.09025e-05
1	Deaths	1	Global	3	Both	9	20-24 years	627	Rheumatoid arthritis	3	Rate	2016	0.00913776	0.0118568	0.00748287
1	Deaths	1	Global	3	Both	10	25-29 years	627	Rheumatoid arthritis	1	Number	2016	85.4493	105.653	68.6434
1	Deaths	1	Global	3	Both	10	25-29 years	627	Rheumatoid arthritis	2	Percent	2016	0.00010448	0.000129175	8.60998e-05
1	Deaths	1	Global	3	Both	10	25-29 years	627	Rheumatoid arthritis	3	Rate	2016	0.0140736	0.0174011	0.0113056
1	Deaths	1	Global	3	Both	11	30-34 years	627	Rheumatoid arthritis	1	Number	2016	126.064	152.149	106.359
1	Deaths	1	Global	3	Both	11	30-34 years	627	Rheumatoid arthritis	2	Percent	2016	0.000132385	0.000158569	0.000112053
1	Deaths	1	Global	3	Both	11	30-34 years	627	Rheumatoid arthritis	3	Rate	2016	0.0222845	0.0268955	0.0188012
1	Deaths	1	Global	3	Both	12	35-39 years	627	Rheumatoid arthritis	1	Number	2016	195.835	232.458	166.673
1	Deaths	1	Global	3	Both	12	35-39 years	627	Rheumatoid arthritis	2	Percent	2016	0.000172344	0.000203837	0.000147347
1	Deaths	1	Global	3	Both	12	35-39 years	627	Rheumatoid arthritis	3	Rate	2016	0.0383668	0.0455418	0.0326536
1	Deaths	1	Global	3	Both	13	40-44 years	627	Rheumatoid arthritis	1	Number	2016	339.787	398.383	282.184
1	Deaths	1	Global	3	Both	13	40-44 years	627	Rheumatoid arthritis	2	Percent	2016	0.000236309	0.000278477	0.000196947
1	Deaths	1	Global	3	Both	13	40-44 years	627	Rheumatoid arthritis	3	Rate	2016	0.0700419	0.0821204	0.058168
1	Deaths	1	Global	3	Both	14	45-49 years	627	Rheumatoid arthritis	1	Number	2016	603.517	701.637	502.531
1	Deaths	1	Global	3	Both	14	45-49 years	627	Rheumatoid arthritis	2	Percent	2016	0.000325832	0.000378958	0.000270374
1	Deaths	1	Global	3	Both	14	45-49 years	627	Rheumatoid arthritis	3	Rate	2016	0.131597	0.152992	0.109577
1	Deaths	1	Global	3	Both	15	50-54 years	627	Rheumatoid arthritis	1	Number	2016	1028.34	1165.69	871.391
1	Deaths	1	Global	3	Both	15	50-54 years	627	Rheumatoid arthritis	2	Percent	2016	0.000415452	0.000466775	0.000355556
1	Deaths	1	Global	3	Both	15	50-54 years	627	Rheumatoid arthritis	3	Rate	2016	0.250568	0.284033	0.212324
1	Deaths	1	Global	3	Both	16	55-59 years	627	Rheumatoid arthritis	1	Number	2016	1541.66	1735.08	1353.3
1	Deaths	1	Global	3	Both	16	55-59 years	627	Rheumatoid arthritis	2	Percent	2016	0.000499953	0.000558312	0.000435877
1	Deaths	1	Global	3	Both	16	55-59 years	627	Rheumatoid arthritis	3	Rate	2016	0.460451	0.518222	0.404192
1	Deaths	1	Global	3	Both	17	60-64 years	627	Rheumatoid arthritis	1	Number	2016	2828.54	3297.45	2363.35
1	Deaths	1	Global	3	Both	17	60-64 years	627	Rheumatoid arthritis	2	Percent	2016	0.000698042	0.000812542	0.000586316
1	Deaths	1	Global	3	Both	17	60-64 years	627	Rheumatoid arthritis	3	Rate	2016	0.948834	1.10613	0.792785
1	Deaths	1	Global	3	Both	18	65-69 years	627	Rheumatoid arthritis	1	Number	2016	3975.12	4782.6	3349.12
1	Deaths	1	Global	3	Both	18	65-69 years	627	Rheumatoid arthritis	2	Percent	2016	0.000847527	0.00100865	0.000719363
1	Deaths	1	Global	3	Both	18	65-69 years	627	Rheumatoid arthritis	3	Rate	2016	1.70594	2.05247	1.43729
1	Deaths	1	Global	3	Both	19	70-74 years	627	Rheumatoid arthritis	1	Number	2016	4780.59	5701.16	3915.08
1	Deaths	1	Global	3	Both	19	70-74 years	627	Rheumatoid arthritis	2	Percent	2016	0.000935293	0.00110853	0.000773325
1	Deaths	1	Global	3	Both	19	70-74 years	627	Rheumatoid arthritis	3	Rate	2016	2.97616	3.54927	2.43734
1	Deaths	1	Global	3	Both	20	75-79 years	627	Rheumatoid arthritis	1	Number	2016	5881.84	6757.52	4946.74
1	Deaths	1	Global	3	Both	20	75-79 years	627	Rheumatoid arthritis	2	Percent	2016	0.000977656	0.00111648	0.000819352
1	Deaths	1	Global	3	Both	20	75-79 years	627	Rheumatoid arthritis	3	Rate	2016	4.84818	5.56997	4.07741
1	Deaths	1	Global	3	Both	30	80-84 years	627	Rheumatoid arthritis	1	Number	2016	5421.38	6533.26	4310.24
1	Deaths	1	Global	3	Both	30	80-84 years	627	Rheumatoid arthritis	2	Percent	2016	0.000868514	0.00103152	0.000691277
1	Deaths	1	Global	3	Both	30	80-84 years	627	Rheumatoid arthritis	3	Rate	2016	7.07965	8.53162	5.62863
1	Deaths	1	Global	3	Both	31	85-89 years	627	Rheumatoid arthritis	1	Number	2016	4114.51	4881.56	3207.14
1	Deaths	1	Global	3	Both	31	85-89 years	627	Rheumatoid arthritis	2	Percent	2016	0.00078031	0.00092531	0.000611371
1	Deaths	1	Global	3	Both	31	85-89 years	627	Rheumatoid arthritis	3	Rate	2016	10.43	12.3744	8.12988
1	Deaths	1	Global	3	Both	32	90-94 years	627	Rheumatoid arthritis	1	Number	2016	1934.77	2280.28	1470.98
1	Deaths	1	Global	3	Both	32	90-94 years	627	Rheumatoid arthritis	2	Percent	2016	0.000653147	0.00076486	0.000495696
1	Deaths	1	Global	3	Both	32	90-94 years	627	Rheumatoid arthritis	3	Rate	2016	13.2807	15.6523	10.0972
1	Deaths	1	Global	3	Both	235	95+ years	627	Rheumatoid arthritis	1	Number	2016	676.229	785.381	505.118
1	Deaths	1	Global	3	Both	235	95+ years	627	Rheumatoid arthritis	2	Percent	2016	0.00059228	0.000688991	0.000442175
1	Deaths	1	Global	3	Both	235	95+ years	627	Rheumatoid arthritis	3	Rate	2016	16.3676	19.0095	12.226
1	Deaths	1	Global	3	Both	6	5-9 years	627	Rheumatoid arthritis	1	Number	1996	35.2013	45.4277	29.8649
1	Deaths	1	Global	3	Both	6	5-9 years	627	Rheumatoid arthritis	2	Percent	1996	4.59895e-05	5.96567e-05	3.89671e-05
1	Deaths	1	Global	3	Both	6	5-9 years	627	Rheumatoid arthritis	3	Rate	1996	0.00571909	0.00738054	0.00485209
1	Deaths	1	Global	3	Both	7	10-14 years	627	Rheumatoid arthritis	1	Number	1996	46.111	60.6242	39.0056
1	Deaths	1	Global	3	Both	7	10-14 years	627	Rheumatoid arthritis	2	Percent	1996	9.93993e-05	0.000131843	8.4427e-05
1	Deaths	1	Global	3	Both	7	10-14 years	627	Rheumatoid arthritis	3	Rate	1996	0.00780979	0.0102679	0.00660636
1	Deaths	1	Global	3	Both	8	15-19 years	627	Rheumatoid arthritis	1	Number	1996	63.7919	79.5964	53.6976
1	Deaths	1	Global	3	Both	8	15-19 years	627	Rheumatoid arthritis	2	Percent	1996	9.30827e-05	0.000115406	7.83086e-05
1	Deaths	1	Global	3	Both	8	15-19 years	627	Rheumatoid arthritis	3	Rate	1996	0.0120402	0.0150232	0.010135
1	Deaths	1	Global	3	Both	9	20-24 years	627	Rheumatoid arthritis	1	Number	1996	72.4284	91.3609	62.4473
1	Deaths	1	Global	3	Both	9	20-24 years	627	Rheumatoid arthritis	2	Percent	1996	8.26551e-05	0.000104278	7.09144e-05
1	Deaths	1	Global	3	Both	9	20-24 years	627	Rheumatoid arthritis	3	Rate	1996	0.0143744	0.0181318	0.0123935
1	Deaths	1	Global	3	Both	10	25-29 years	627	Rheumatoid arthritis	1	Number	1996	96.4858	122.694	83.94
1	Deaths	1	Global	3	Both	10	25-29 years	627	Rheumatoid arthritis	2	Percent	1996	0.000101789	0.000128561	8.77218e-05
1	Deaths	1	Global	3	Both	10	25-29 years	627	Rheumatoid arthritis	3	Rate	1996	0.0197273	0.0250858	0.0171622
1	Deaths	1	Global	3	Both	11	30-34 years	627	Rheumatoid arthritis	1	Number	1996	142.95	174.753	125.083
1	Deaths	1	Global	3	Both	11	30-34 years	627	Rheumatoid arthritis	2	Percent	1996	0.000134986	0.000167145	0.000117305
1	Deaths	1	Global	3	Both	11	30-34 years	627	Rheumatoid arthritis	3	Rate	1996	0.0316251	0.0386611	0.0276725
1	Deaths	1	Global	3	Both	12	35-39 years	627	Rheumatoid arthritis	1	Number	1996	205.808	239.18	181.458
1	Deaths	1	Global	3	Both	12	35-39 years	627	Rheumatoid arthritis	2	Percent	1996	0.000175211	0.000205591	0.000153856
1	Deaths	1	Global	3	Both	12	35-39 years	627	Rheumatoid arthritis	3	Rate	1996	0.0535143	0.0621917	0.0471828
1	Deaths	1	Global	3	Both	13	40-44 years	627	Rheumatoid arthritis	1	Number	1996	339.537	395.855	301.425
1	Deaths	1	Global	3	Both	13	40-44 years	627	Rheumatoid arthritis	2	Percent	1996	0.000234585	0.000274128	0.000207273
1	Deaths	1	Global	3	Both	13	40-44 years	627	Rheumatoid arthritis	3	Rate	1996	0.0967039	0.112744	0.0858493
1	Deaths	1	Global	3	Both	14	45-49 years	627	Rheumatoid arthritis	1	Number	1996	504.069	579.294	451.157
1	Deaths	1	Global	3	Both	14	45-49 years	627	Rheumatoid arthritis	2	Percent	1996	0.000312223	0.000355705	0.00027696
1	Deaths	1	Global	3	Both	14	45-49 years	627	Rheumatoid arthritis	3	Rate	1996	0.174597	0.200653	0.15627
1	Deaths	1	Global	3	Both	15	50-54 years	627	Rheumatoid arthritis	1	Number	1996	737.575	827.841	662.197
1	Deaths	1	Global	3	Both	15	50-54 years	627	Rheumatoid arthritis	2	Percent	1996	0.000389348	0.000437508	0.000347116
1	Deaths	1	Global	3	Both	15	50-54 years	627	Rheumatoid arthritis	3	Rate	1996	0.332798	0.373526	0.298787
1	Deaths	1	Global	3	Both	16	55-59 years	627	Rheumatoid arthritis	1	Number	1996	1277.66	1429.27	1144.48
1	Deaths	1	Global	3	Both	16	55-59 years	627	Rheumatoid arthritis	2	Percent	1996	0.000499677	0.000556712	0.000446353
1	Deaths	1	Global	3	Both	16	55-59 years	627	Rheumatoid arthritis	3	Rate	1996	0.634559	0.709858	0.568414
1	Deaths	1	Global	3	Both	17	60-64 years	627	Rheumatoid arthritis	1	Number	1996	2191.91	2531.48	1937.49
1	Deaths	1	Global	3	Both	17	60-64 years	627	Rheumatoid arthritis	2	Percent	1996	0.000661314	0.000765108	0.000584937
1	Deaths	1	Global	3	Both	17	60-64 years	627	Rheumatoid arthritis	3	Rate	1996	1.25755	1.45237	1.11158
1	Deaths	1	Global	3	Both	18	65-69 years	627	Rheumatoid arthritis	1	Number	1996	3195.17	3674.2	2834.08
1	Deaths	1	Global	3	Both	18	65-69 years	627	Rheumatoid arthritis	2	Percent	1996	0.000777493	0.000894312	0.00068777
1	Deaths	1	Global	3	Both	18	65-69 years	627	Rheumatoid arthritis	3	Rate	1996	2.20564	2.53631	1.95637
1	Deaths	1	Global	3	Both	19	70-74 years	627	Rheumatoid arthritis	1	Number	1996	3877.9	4433.52	3417.5
1	Deaths	1	Global	3	Both	19	70-74 years	627	Rheumatoid arthritis	2	Percent	1996	0.000843475	0.000966082	0.000740311
1	Deaths	1	Global	3	Both	19	70-74 years	627	Rheumatoid arthritis	3	Rate	1996	3.65942	4.18374	3.22496
1	Deaths	1	Global	3	Both	20	75-79 years	627	Rheumatoid arthritis	1	Number	1996	3811.02	4261.89	3340.87
1	Deaths	1	Global	3	Both	20	75-79 years	627	Rheumatoid arthritis	2	Percent	1996	0.000879553	0.000989012	0.000768492
1	Deaths	1	Global	3	Both	20	75-79 years	627	Rheumatoid arthritis	3	Rate	1996	5.74568	6.42543	5.03686
1	Deaths	1	Global	3	Both	30	80-84 years	627	Rheumatoid arthritis	1	Number	1996	3013.96	3468.71	2544.01
1	Deaths	1	Global	3	Both	30	80-84 years	627	Rheumatoid arthritis	2	Percent	1996	0.000724604	0.000832986	0.000611214
1	Deaths	1	Global	3	Both	30	80-84 years	627	Rheumatoid arthritis	3	Rate	1996	7.48503	8.61438	6.31794
1	Deaths	1	Global	3	Both	31	85-89 years	627	Rheumatoid arthritis	1	Number	1996	2031.93	2358.62	1683.08
1	Deaths	1	Global	3	Both	31	85-89 years	627	Rheumatoid arthritis	2	Percent	1996	0.000668135	0.000777557	0.000552729
1	Deaths	1	Global	3	Both	31	85-89 years	627	Rheumatoid arthritis	3	Rate	1996	10.6698	12.3853	8.83796
1	Deaths	1	Global	3	Both	32	90-94 years	627	Rheumatoid arthritis	1	Number	1996	783.802	925.545	624.705
1	Deaths	1	Global	3	Both	32	90-94 years	627	Rheumatoid arthritis	2	Percent	1996	0.000546251	0.00064492	0.000434657
1	Deaths	1	Global	3	Both	32	90-94 years	627	Rheumatoid arthritis	3	Rate	1996	12.8884	15.2192	10.2723
1	Deaths	1	Global	3	Both	235	95+ years	627	Rheumatoid arthritis	1	Number	1996	201.676	233.472	155.319
1	Deaths	1	Global	3	Both	235	95+ years	627	Rheumatoid arthritis	2	Percent	1996	0.000456481	0.000528713	0.000350877
1	Deaths	1	Global	3	Both	235	95+ years	627	Rheumatoid arthritis	3	Rate	1996	14.73	17.0524	11.3442
1	Deaths	1	Global	3	Both	6	5-9 years	627	Rheumatoid arthritis	1	Number	2021	14.2576	18.3664	11.5838
1	Deaths	1	Global	3	Both	6	5-9 years	627	Rheumatoid arthritis	2	Percent	2021	4.00764e-05	5.1381e-05	3.23663e-05
1	Deaths	1	Global	3	Both	6	5-9 years	627	Rheumatoid arthritis	3	Rate	2021	0.00207518	0.00267321	0.00168601
1	Deaths	1	Global	3	Both	7	10-14 years	627	Rheumatoid arthritis	1	Number	2021	23.8315	30.1338	18.6211
1	Deaths	1	Global	3	Both	7	10-14 years	627	Rheumatoid arthritis	2	Percent	2021	7.85242e-05	0.000101059	6.24918e-05
1	Deaths	1	Global	3	Both	7	10-14 years	627	Rheumatoid arthritis	3	Rate	2021	0.00357489	0.00452028	0.00279329
1	Deaths	1	Global	3	Both	8	15-19 years	627	Rheumatoid arthritis	1	Number	2021	37.9552	47.6149	30.4586
1	Deaths	1	Global	3	Both	8	15-19 years	627	Rheumatoid arthritis	2	Percent	2021	6.72153e-05	8.45847e-05	5.4779e-05
1	Deaths	1	Global	3	Both	8	15-19 years	627	Rheumatoid arthritis	3	Rate	2021	0.00608276	0.00763085	0.00488134
1	Deaths	1	Global	3	Both	9	20-24 years	627	Rheumatoid arthritis	1	Number	2021	47.1203	61.8799	37.7967
1	Deaths	1	Global	3	Both	9	20-24 years	627	Rheumatoid arthritis	2	Percent	2021	6.38441e-05	8.40481e-05	5.0584e-05
1	Deaths	1	Global	3	Both	9	20-24 years	627	Rheumatoid arthritis	3	Rate	2021	0.00789075	0.0103624	0.00632943
1	Deaths	1	Global	3	Both	10	25-29 years	627	Rheumatoid arthritis	1	Number	2021	71.7031	88.704	58.1636
1	Deaths	1	Global	3	Both	10	25-29 years	627	Rheumatoid arthritis	2	Percent	2021	8.39281e-05	0.000103303	6.7347e-05
1	Deaths	1	Global	3	Both	10	25-29 years	627	Rheumatoid arthritis	3	Rate	2021	0.0121873	0.0150769	0.009886
1	Deaths	1	Global	3	Both	11	30-34 years	627	Rheumatoid arthritis	1	Number	2021	123.576	151.542	101.881
1	Deaths	1	Global	3	Both	11	30-34 years	627	Rheumatoid arthritis	2	Percent	2021	0.000110507	0.000134442	9.20833e-05
1	Deaths	1	Global	3	Both	11	30-34 years	627	Rheumatoid arthritis	3	Rate	2021	0.0204434	0.0250698	0.0168543
1	Deaths	1	Global	3	Both	12	35-39 years	627	Rheumatoid arthritis	1	Number	2021	194.07	228.817	158.521
1	Deaths	1	Global	3	Both	12	35-39 years	627	Rheumatoid arthritis	2	Percent	2021	0.000140236	0.000163895	0.000114753
1	Deaths	1	Global	3	Both	12	35-39 years	627	Rheumatoid arthritis	3	Rate	2021	0.0346018	0.0407971	0.0282636
1	Deaths	1	Global	3	Both	13	40-44 years	627	Rheumatoid arthritis	1	Number	2021	310.359	362.978	260.579
1	Deaths	1	Global	3	Both	13	40-44 years	627	Rheumatoid arthritis	2	Percent	2021	0.000172942	0.00020154	0.000143525
1	Deaths	1	Global	3	Both	13	40-44 years	627	Rheumatoid arthritis	3	Rate	2021	0.0620407	0.0725592	0.0520896
1	Deaths	1	Global	3	Both	14	45-49 years	627	Rheumatoid arthritis	1	Number	2021	565.181	653.983	475.168
1	Deaths	1	Global	3	Both	14	45-49 years	627	Rheumatoid arthritis	2	Percent	2021	0.000248948	0.000287275	0.000208443
1	Deaths	1	Global	3	Both	14	45-49 years	627	Rheumatoid arthritis	3	Rate	2021	0.119361	0.138116	0.100351
1	Deaths	1	Global	3	Both	15	50-54 years	627	Rheumatoid arthritis	1	Number	2021	996.071	1128.23	850.825
1	Deaths	1	Global	3	Both	15	50-54 years	627	Rheumatoid arthritis	2	Percent	2021	0.00032641	0.00036957	0.000280171
1	Deaths	1	Global	3	Both	15	50-54 years	627	Rheumatoid arthritis	3	Rate	2021	0.223875	0.25358	0.19123
1	Deaths	1	Global	3	Both	16	55-59 years	627	Rheumatoid arthritis	1	Number	2021	1745.94	1987.31	1481.52
1	Deaths	1	Global	3	Both	16	55-59 years	627	Rheumatoid arthritis	2	Percent	2021	0.000425812	0.000478775	0.000367202
1	Deaths	1	Global	3	Both	16	55-59 years	627	Rheumatoid arthritis	3	Rate	2021	0.441197	0.50219	0.374379
1	Deaths	1	Global	3	Both	17	60-64 years	627	Rheumatoid arthritis	1	Number	2021	2781.74	3245.8	2375.34
1	Deaths	1	Global	3	Both	17	60-64 years	627	Rheumatoid arthritis	2	Percent	2021	0.0005396	0.000629153	0.000457829
1	Deaths	1	Global	3	Both	17	60-64 years	627	Rheumatoid arthritis	3	Rate	2021	0.869165	1.01416	0.742184
1	Deaths	1	Global	3	Both	18	65-69 years	627	Rheumatoid arthritis	1	Number	2021	4485.81	5260	3752.9
1	Deaths	1	Global	3	Both	18	65-69 years	627	Rheumatoid arthritis	2	Percent	2021	0.000679197	0.00080999	0.000578735
1	Deaths	1	Global	3	Both	18	65-69 years	627	Rheumatoid arthritis	3	Rate	2021	1.62622	1.90689	1.36052
1	Deaths	1	Global	3	Both	19	70-74 years	627	Rheumatoid arthritis	1	Number	2021	5857.04	6759.83	4828.2
1	Deaths	1	Global	3	Both	19	70-74 years	627	Rheumatoid arthritis	2	Percent	2021	0.000779725	0.000907271	0.000641512
1	Deaths	1	Global	3	Both	19	70-74 years	627	Rheumatoid arthritis	3	Rate	2021	2.84545	3.28403	2.34562
1	Deaths	1	Global	3	Both	20	75-79 years	627	Rheumatoid arthritis	1	Number	2021	6399.73	7238.53	5348.91
1	Deaths	1	Global	3	Both	20	75-79 years	627	Rheumatoid arthritis	2	Percent	2021	0.000872665	0.000977949	0.000722653
1	Deaths	1	Global	3	Both	20	75-79 years	627	Rheumatoid arthritis	3	Rate	2021	4.85253	5.48854	4.05576
1	Deaths	1	Global	3	Both	30	80-84 years	627	Rheumatoid arthritis	1	Number	2021	5934.17	6928.14	4661.79
1	Deaths	1	Global	3	Both	30	80-84 years	627	Rheumatoid arthritis	2	Percent	2021	0.000752132	0.000875781	0.000589848
1	Deaths	1	Global	3	Both	30	80-84 years	627	Rheumatoid arthritis	3	Rate	2021	6.77547	7.91037	5.3227
1	Deaths	1	Global	3	Both	31	85-89 years	627	Rheumatoid arthritis	1	Number	2021	4645.68	5545.26	3590.45
1	Deaths	1	Global	3	Both	31	85-89 years	627	Rheumatoid arthritis	2	Percent	2021	0.000705217	0.000833413	0.000549565
1	Deaths	1	Global	3	Both	31	85-89 years	627	Rheumatoid arthritis	3	Rate	2021	10.1608	12.1283	7.85281
1	Deaths	1	Global	3	Both	32	90-94 years	627	Rheumatoid arthritis	1	Number	2021	2278.65	2648.03	1716.2
1	Deaths	1	Global	3	Both	32	90-94 years	627	Rheumatoid arthritis	2	Percent	2021	0.000575475	0.000672892	0.000431357
1	Deaths	1	Global	3	Both	32	90-94 years	627	Rheumatoid arthritis	3	Rate	2021	12.7374	14.8022	9.59338
1	Deaths	1	Global	3	Both	235	95+ years	627	Rheumatoid arthritis	1	Number	2021	817.462	946.968	588.229
1	Deaths	1	Global	3	Both	235	95+ years	627	Rheumatoid arthritis	2	Percent	2021	0.000500982	0.000575442	0.000363023
1	Deaths	1	Global	3	Both	235	95+ years	627	Rheumatoid arthritis	3	Rate	2021	14.9985	17.3746	10.7926
1	Deaths	1	Global	3	Both	6	5-9 years	627	Rheumatoid arthritis	1	Number	2017	17.0571	21.4096	14.2316
1	Deaths	1	Global	3	Both	6	5-9 years	627	Rheumatoid arthritis	2	Percent	2017	3.94167e-05	4.94077e-05	3.30312e-05
1	Deaths	1	Global	3	Both	6	5-9 years	627	Rheumatoid arthritis	3	Rate	2017	0.00256308	0.00321711	0.00213851
1	Deaths	1	Global	3	Both	7	10-14 years	627	Rheumatoid arthritis	1	Number	2017	26.7917	33.8892	21.5
1	Deaths	1	Global	3	Both	7	10-14 years	627	Rheumatoid arthritis	2	Percent	2017	8.14799e-05	0.000102712	6.6441e-05
1	Deaths	1	Global	3	Both	7	10-14 years	627	Rheumatoid arthritis	3	Rate	2017	0.00422669	0.00534641	0.00339188
1	Deaths	1	Global	3	Both	8	15-19 years	627	Rheumatoid arthritis	1	Number	2017	42.1345	52.7389	35.0532
1	Deaths	1	Global	3	Both	8	15-19 years	627	Rheumatoid arthritis	2	Percent	2017	7.22295e-05	9.03044e-05	6.00108e-05
1	Deaths	1	Global	3	Both	8	15-19 years	627	Rheumatoid arthritis	3	Rate	2017	0.00696215	0.00871438	0.00579206
1	Deaths	1	Global	3	Both	9	20-24 years	627	Rheumatoid arthritis	1	Number	2017	52.7605	69.0245	43.7354
1	Deaths	1	Global	3	Both	9	20-24 years	627	Rheumatoid arthritis	2	Percent	2017	7.14729e-05	9.19993e-05	5.9618e-05
1	Deaths	1	Global	3	Both	9	20-24 years	627	Rheumatoid arthritis	3	Rate	2017	0.00886014	0.0115914	0.00734456
1	Deaths	1	Global	3	Both	10	25-29 years	627	Rheumatoid arthritis	1	Number	2017	82.397	101.044	66.8625
1	Deaths	1	Global	3	Both	10	25-29 years	627	Rheumatoid arthritis	2	Percent	2017	0.000101448	0.000125381	8.3579e-05
1	Deaths	1	Global	3	Both	10	25-29 years	627	Rheumatoid arthritis	3	Rate	2017	0.0136254	0.0167089	0.0110566
1	Deaths	1	Global	3	Both	11	30-34 years	627	Rheumatoid arthritis	1	Number	2017	126.655	153.461	108.168
1	Deaths	1	Global	3	Both	11	30-34 years	627	Rheumatoid arthritis	2	Percent	2017	0.000133339	0.000160193	0.000113077
1	Deaths	1	Global	3	Both	11	30-34 years	627	Rheumatoid arthritis	3	Rate	2017	0.0218817	0.0265128	0.0186877
1	Deaths	1	Global	3	Both	12	35-39 years	627	Rheumatoid arthritis	1	Number	2017	194.327	230.436	164.971
1	Deaths	1	Global	3	Both	12	35-39 years	627	Rheumatoid arthritis	2	Percent	2017	0.000170803	0.000202849	0.000145967
1	Deaths	1	Global	3	Both	12	35-39 years	627	Rheumatoid arthritis	3	Rate	2017	0.0375307	0.0445045	0.0318611
1	Deaths	1	Global	3	Both	13	40-44 years	627	Rheumatoid arthritis	1	Number	2017	330.772	390.228	277.92
1	Deaths	1	Global	3	Both	13	40-44 years	627	Rheumatoid arthritis	2	Percent	2017	0.000230627	0.000274012	0.00019264
1	Deaths	1	Global	3	Both	13	40-44 years	627	Rheumatoid arthritis	3	Rate	2017	0.068148	0.0803977	0.0572591
1	Deaths	1	Global	3	Both	14	45-49 years	627	Rheumatoid arthritis	1	Number	2017	590.275	689.521	496.829
1	Deaths	1	Global	3	Both	14	45-49 years	627	Rheumatoid arthritis	2	Percent	2017	0.000321582	0.000372915	0.000270578
1	Deaths	1	Global	3	Both	14	45-49 years	627	Rheumatoid arthritis	3	Rate	2017	0.127316	0.148722	0.10716
1	Deaths	1	Global	3	Both	15	50-54 years	627	Rheumatoid arthritis	1	Number	2017	1024.27	1165.19	885.036
1	Deaths	1	Global	3	Both	15	50-54 years	627	Rheumatoid arthritis	2	Percent	2017	0.000415791	0.000467488	0.000359186
1	Deaths	1	Global	3	Both	15	50-54 years	627	Rheumatoid arthritis	3	Rate	2017	0.243316	0.276794	0.210242
1	Deaths	1	Global	3	Both	16	55-59 years	627	Rheumatoid arthritis	1	Number	2017	1557.68	1765.55	1351.22
1	Deaths	1	Global	3	Both	16	55-59 years	627	Rheumatoid arthritis	2	Percent	2017	0.000501849	0.000571609	0.00043697
1	Deaths	1	Global	3	Both	16	55-59 years	627	Rheumatoid arthritis	3	Rate	2017	0.453513	0.514034	0.393404
1	Deaths	1	Global	3	Both	17	60-64 years	627	Rheumatoid arthritis	1	Number	2017	2841.97	3305.69	2387.33
1	Deaths	1	Global	3	Both	17	60-64 years	627	Rheumatoid arthritis	2	Percent	2017	0.000698431	0.000815673	0.000593508
1	Deaths	1	Global	3	Both	17	60-64 years	627	Rheumatoid arthritis	3	Rate	2017	0.933366	1.08566	0.784054
1	Deaths	1	Global	3	Both	18	65-69 years	627	Rheumatoid arthritis	1	Number	2017	4119.68	4949.32	3442.78
1	Deaths	1	Global	3	Both	18	65-69 years	627	Rheumatoid arthritis	2	Percent	2017	0.000851377	0.00101526	0.000715368
1	Deaths	1	Global	3	Both	18	65-69 years	627	Rheumatoid arthritis	3	Rate	2017	1.70427	2.04748	1.42424
1	Deaths	1	Global	3	Both	19	70-74 years	627	Rheumatoid arthritis	1	Number	2017	5020.73	6008.86	4080.14
1	Deaths	1	Global	3	Both	19	70-74 years	627	Rheumatoid arthritis	2	Percent	2017	0.000948192	0.00112033	0.000783006
1	Deaths	1	Global	3	Both	19	70-74 years	627	Rheumatoid arthritis	3	Rate	2017	2.97956	3.56596	2.42136
1	Deaths	1	Global	3	Both	20	75-79 years	627	Rheumatoid arthritis	1	Number	2017	6073.14	6883.97	5101.1
1	Deaths	1	Global	3	Both	20	75-79 years	627	Rheumatoid arthritis	2	Percent	2017	0.00100396	0.00114345	0.000844281
1	Deaths	1	Global	3	Both	20	75-79 years	627	Rheumatoid arthritis	3	Rate	2017	4.92085	5.57784	4.13324
1	Deaths	1	Global	3	Both	30	80-84 years	627	Rheumatoid arthritis	1	Number	2017	5642.26	6725.42	4493.31
1	Deaths	1	Global	3	Both	30	80-84 years	627	Rheumatoid arthritis	2	Percent	2017	0.000885955	0.00105501	0.000706631
1	Deaths	1	Global	3	Both	30	80-84 years	627	Rheumatoid arthritis	3	Rate	2017	7.12354	8.49107	5.67296
1	Deaths	1	Global	3	Both	31	85-89 years	627	Rheumatoid arthritis	1	Number	2017	4311.18	5144.67	3383.09
1	Deaths	1	Global	3	Both	31	85-89 years	627	Rheumatoid arthritis	2	Percent	2017	0.000802926	0.00095738	0.000630141
1	Deaths	1	Global	3	Both	31	85-89 years	627	Rheumatoid arthritis	3	Rate	2017	10.5996	12.6489	8.31777
1	Deaths	1	Global	3	Both	32	90-94 years	627	Rheumatoid arthritis	1	Number	2017	2025.03	2362.06	1534.87
1	Deaths	1	Global	3	Both	32	90-94 years	627	Rheumatoid arthritis	2	Percent	2017	0.00066072	0.000761835	0.00050168
1	Deaths	1	Global	3	Both	32	90-94 years	627	Rheumatoid arthritis	3	Rate	2017	13.2483	15.4533	10.0415
1	Deaths	1	Global	3	Both	235	95+ years	627	Rheumatoid arthritis	1	Number	2017	713.035	824.505	530.073
1	Deaths	1	Global	3	Both	235	95+ years	627	Rheumatoid arthritis	2	Percent	2017	0.000584351	0.000670499	0.00043497
1	Deaths	1	Global	3	Both	235	95+ years	627	Rheumatoid arthritis	3	Rate	2017	16.2167	18.7519	12.0556
1	Deaths	1	Global	3	Both	6	5-9 years	627	Rheumatoid arthritis	1	Number	1993	41.9558	53.508	35.6709
1	Deaths	1	Global	3	Both	6	5-9 years	627	Rheumatoid arthritis	2	Percent	1993	5.29519e-05	6.79951e-05	4.49469e-05
1	Deaths	1	Global	3	Both	6	5-9 years	627	Rheumatoid arthritis	3	Rate	1993	0.00689368	0.00879181	0.00586102
1	Deaths	1	Global	3	Both	7	10-14 years	627	Rheumatoid arthritis	1	Number	1993	50.5835	65.2253	42.6668
1	Deaths	1	Global	3	Both	7	10-14 years	627	Rheumatoid arthritis	2	Percent	1993	0.000111074	0.000143076	9.3589e-05
1	Deaths	1	Global	3	Both	7	10-14 years	627	Rheumatoid arthritis	3	Rate	1993	0.00905647	0.0116779	0.00763907
1	Deaths	1	Global	3	Both	8	15-19 years	627	Rheumatoid arthritis	1	Number	1993	71.9654	89.7406	60.391
1	Deaths	1	Global	3	Both	8	15-19 years	627	Rheumatoid arthritis	2	Percent	1993	0.000106829	0.000133701	8.9273e-05
1	Deaths	1	Global	3	Both	8	15-19 years	627	Rheumatoid arthritis	3	Rate	1993	0.0139115	0.0173476	0.0116741
1	Deaths	1	Global	3	Both	9	20-24 years	627	Rheumatoid arthritis	1	Number	1993	87.0518	107.118	73.2083
1	Deaths	1	Global	3	Both	9	20-24 years	627	Rheumatoid arthritis	2	Percent	1993	0.00010201	0.000125954	8.67311e-05
1	Deaths	1	Global	3	Both	9	20-24 years	627	Rheumatoid arthritis	3	Rate	1993	0.0173016	0.0212897	0.0145502
1	Deaths	1	Global	3	Both	10	25-29 years	627	Rheumatoid arthritis	1	Number	1993	117.362	142.372	100.051
1	Deaths	1	Global	3	Both	10	25-29 years	627	Rheumatoid arthritis	2	Percent	1993	0.000130629	0.000159697	0.00011206
1	Deaths	1	Global	3	Both	10	25-29 years	627	Rheumatoid arthritis	3	Rate	1993	0.0247193	0.0299871	0.0210733
1	Deaths	1	Global	3	Both	11	30-34 years	627	Rheumatoid arthritis	1	Number	1993	153.258	180.58	133.516
1	Deaths	1	Global	3	Both	11	30-34 years	627	Rheumatoid arthritis	2	Percent	1993	0.000158293	0.000184984	0.000135893
1	Deaths	1	Global	3	Both	11	30-34 years	627	Rheumatoid arthritis	3	Rate	1993	0.0372584	0.0439007	0.0324589
1	Deaths	1	Global	3	Both	12	35-39 years	627	Rheumatoid arthritis	1	Number	1993	236.403	274.386	205.568
1	Deaths	1	Global	3	Both	12	35-39 years	627	Rheumatoid arthritis	2	Percent	1993	0.000210077	0.000243551	0.000183055
1	Deaths	1	Global	3	Both	12	35-39 years	627	Rheumatoid arthritis	3	Rate	1993	0.0633263	0.0735008	0.0550664
1	Deaths	1	Global	3	Both	13	40-44 years	627	Rheumatoid arthritis	1	Number	1993	346.389	402.675	303.833
1	Deaths	1	Global	3	Both	13	40-44 years	627	Rheumatoid arthritis	2	Percent	1993	0.000259959	0.000306281	0.000230223
1	Deaths	1	Global	3	Both	13	40-44 years	627	Rheumatoid arthritis	3	Rate	1993	0.107619	0.125106	0.0943975
1	Deaths	1	Global	3	Both	14	45-49 years	627	Rheumatoid arthritis	1	Number	1993	474.226	545.024	418.174
1	Deaths	1	Global	3	Both	14	45-49 years	627	Rheumatoid arthritis	2	Percent	1993	0.000332378	0.000380976	0.000294922
1	Deaths	1	Global	3	Both	14	45-49 years	627	Rheumatoid arthritis	3	Rate	1993	0.187772	0.215805	0.165578
1	Deaths	1	Global	3	Both	15	50-54 years	627	Rheumatoid arthritis	1	Number	1993	773.697	876.801	686.978
1	Deaths	1	Global	3	Both	15	50-54 years	627	Rheumatoid arthritis	2	Percent	1993	0.000400446	0.000452757	0.000358332
1	Deaths	1	Global	3	Both	15	50-54 years	627	Rheumatoid arthritis	3	Rate	1993	0.356147	0.403607	0.316229
1	Deaths	1	Global	3	Both	16	55-59 years	627	Rheumatoid arthritis	1	Number	1993	1287.23	1445.19	1143.22
1	Deaths	1	Global	3	Both	16	55-59 years	627	Rheumatoid arthritis	2	Percent	1993	0.000509089	0.000565399	0.00045603
1	Deaths	1	Global	3	Both	16	55-59 years	627	Rheumatoid arthritis	3	Rate	1993	0.66268	0.744002	0.588541
1	Deaths	1	Global	3	Both	17	60-64 years	627	Rheumatoid arthritis	1	Number	1993	2196.41	2486.34	1936.83
1	Deaths	1	Global	3	Both	17	60-64 years	627	Rheumatoid arthritis	2	Percent	1993	0.00066157	0.000749116	0.00058793
1	Deaths	1	Global	3	Both	17	60-64 years	627	Rheumatoid arthritis	3	Rate	1993	1.3054	1.47771	1.15112
1	Deaths	1	Global	3	Both	18	65-69 years	627	Rheumatoid arthritis	1	Number	1993	3078.39	3482.13	2715.89
1	Deaths	1	Global	3	Both	18	65-69 years	627	Rheumatoid arthritis	2	Percent	1993	0.000787208	0.000889774	0.000703361
1	Deaths	1	Global	3	Both	18	65-69 years	627	Rheumatoid arthritis	3	Rate	1993	2.27789	2.57665	2.00966
1	Deaths	1	Global	3	Both	19	70-74 years	627	Rheumatoid arthritis	1	Number	1993	3582.17	4069.86	3139.56
1	Deaths	1	Global	3	Both	19	70-74 years	627	Rheumatoid arthritis	2	Percent	1993	0.000842004	0.000960303	0.000742373
1	Deaths	1	Global	3	Both	19	70-74 years	627	Rheumatoid arthritis	3	Rate	1993	3.75529	4.26655	3.29129
1	Deaths	1	Global	3	Both	20	75-79 years	627	Rheumatoid arthritis	1	Number	1993	3656.39	4062.59	3229.88
1	Deaths	1	Global	3	Both	20	75-79 years	627	Rheumatoid arthritis	2	Percent	1993	0.000868707	0.000962142	0.000767725
1	Deaths	1	Global	3	Both	20	75-79 years	627	Rheumatoid arthritis	3	Rate	1993	5.92973	6.58848	5.23803
1	Deaths	1	Global	3	Both	30	80-84 years	627	Rheumatoid arthritis	1	Number	1993	2891.83	3292.23	2458.56
1	Deaths	1	Global	3	Both	30	80-84 years	627	Rheumatoid arthritis	2	Percent	1993	0.000716884	0.000814998	0.000614276
1	Deaths	1	Global	3	Both	30	80-84 years	627	Rheumatoid arthritis	3	Rate	1993	7.49747	8.53556	6.37417
1	Deaths	1	Global	3	Both	31	85-89 years	627	Rheumatoid arthritis	1	Number	1993	1939.04	2255.67	1605.67
1	Deaths	1	Global	3	Both	31	85-89 years	627	Rheumatoid arthritis	2	Percent	1993	0.000693058	0.000805726	0.000577364
1	Deaths	1	Global	3	Both	31	85-89 years	627	Rheumatoid arthritis	3	Rate	1993	11.2672	13.107	9.33006
1	Deaths	1	Global	3	Both	32	90-94 years	627	Rheumatoid arthritis	1	Number	1993	693.164	804.077	549.335
1	Deaths	1	Global	3	Both	32	90-94 years	627	Rheumatoid arthritis	2	Percent	1993	0.000561697	0.000651715	0.000446126
1	Deaths	1	Global	3	Both	32	90-94 years	627	Rheumatoid arthritis	3	Rate	1993	13.4476	15.5994	10.6573
1	Deaths	1	Global	3	Both	235	95+ years	627	Rheumatoid arthritis	1	Number	1993	181.287	209.826	139.09
1	Deaths	1	Global	3	Both	235	95+ years	627	Rheumatoid arthritis	2	Percent	1993	0.000477857	0.000553104	0.000366306
1	Deaths	1	Global	3	Both	235	95+ years	627	Rheumatoid arthritis	3	Rate	1993	15.6707	18.1376	12.0231
1	Deaths	1	Global	3	Both	6	5-9 years	627	Rheumatoid arthritis	1	Number	2002	28.2942	36.0137	22.9351
1	Deaths	1	Global	3	Both	6	5-9 years	627	Rheumatoid arthritis	2	Percent	2002	4.45564e-05	5.62633e-05	3.63054e-05
1	Deaths	1	Global	3	Both	6	5-9 years	627	Rheumatoid arthritis	3	Rate	2002	0.00473494	0.00602677	0.0038381
1	Deaths	1	Global	3	Both	7	10-14 years	627	Rheumatoid arthritis	1	Number	2002	43.667	54.4362	35.3337
1	Deaths	1	Global	3	Both	7	10-14 years	627	Rheumatoid arthritis	2	Percent	2002	9.97568e-05	0.000126762	8.07587e-05
1	Deaths	1	Global	3	Both	7	10-14 years	627	Rheumatoid arthritis	3	Rate	2002	0.00701635	0.00874673	0.00567737
1	Deaths	1	Global	3	Both	8	15-19 years	627	Rheumatoid arthritis	1	Number	2002	67.3568	85.9638	55.2886
1	Deaths	1	Global	3	Both	8	15-19 years	627	Rheumatoid arthritis	2	Percent	2002	9.66289e-05	0.000123697	8.01568e-05
1	Deaths	1	Global	3	Both	8	15-19 years	627	Rheumatoid arthritis	3	Rate	2002	0.0113209	0.0144482	0.00929254
1	Deaths	1	Global	3	Both	9	20-24 years	627	Rheumatoid arthritis	1	Number	2002	72.7675	93.0485	62.3856
1	Deaths	1	Global	3	Both	9	20-24 years	627	Rheumatoid arthritis	2	Percent	2002	8.29742e-05	0.000105208	7.0705e-05
1	Deaths	1	Global	3	Both	9	20-24 years	627	Rheumatoid arthritis	3	Rate	2002	0.0138507	0.017711	0.0118746
1	Deaths	1	Global	3	Both	10	25-29 years	627	Rheumatoid arthritis	1	Number	2002	104.593	128.562	89.0077
1	Deaths	1	Global	3	Both	10	25-29 years	627	Rheumatoid arthritis	2	Percent	2002	0.000103731	0.000127194	8.78896e-05
1	Deaths	1	Global	3	Both	10	25-29 years	627	Rheumatoid arthritis	3	Rate	2002	0.0209833	0.0257918	0.0178566
1	Deaths	1	Global	3	Both	11	30-34 years	627	Rheumatoid arthritis	1	Number	2002	164.817	196.525	142.237
1	Deaths	1	Global	3	Both	11	30-34 years	627	Rheumatoid arthritis	2	Percent	2002	0.000140913	0.000170334	0.000120964
1	Deaths	1	Global	3	Both	11	30-34 years	627	Rheumatoid arthritis	3	Rate	2002	0.0337411	0.0402323	0.0291185
1	Deaths	1	Global	3	Both	12	35-39 years	627	Rheumatoid arthritis	1	Number	2002	265.27	309.927	222.205
1	Deaths	1	Global	3	Both	12	35-39 years	627	Rheumatoid arthritis	2	Percent	2002	0.000189401	0.000223185	0.000159604
1	Deaths	1	Global	3	Both	12	35-39 years	627	Rheumatoid arthritis	3	Rate	2002	0.05805	0.0678225	0.0486259
1	Deaths	1	Global	3	Both	13	40-44 years	627	Rheumatoid arthritis	1	Number	2002	357.322	413.364	310.448
1	Deaths	1	Global	3	Both	13	40-44 years	627	Rheumatoid arthritis	2	Percent	2002	0.000230237	0.000265221	0.000200339
1	Deaths	1	Global	3	Both	13	40-44 years	627	Rheumatoid arthritis	3	Rate	2002	0.0936488	0.108336	0.0813637
1	Deaths	1	Global	3	Both	14	45-49 years	627	Rheumatoid arthritis	1	Number	2002	608.281	700.008	525.433
1	Deaths	1	Global	3	Both	14	45-49 years	627	Rheumatoid arthritis	2	Percent	2002	0.000325914	0.000372524	0.000281039
1	Deaths	1	Global	3	Both	14	45-49 years	627	Rheumatoid arthritis	3	Rate	2002	0.177239	0.203966	0.153099
1	Deaths	1	Global	3	Both	15	50-54 years	627	Rheumatoid arthritis	1	Number	2002	962.872	1078.11	853.228
1	Deaths	1	Global	3	Both	15	50-54 years	627	Rheumatoid arthritis	2	Percent	2002	0.000428561	0.000478932	0.000380668
1	Deaths	1	Global	3	Both	15	50-54 years	627	Rheumatoid arthritis	3	Rate	2002	0.339783	0.380449	0.301091
1	Deaths	1	Global	3	Both	16	55-59 years	627	Rheumatoid arthritis	1	Number	2002	1319.62	1485.16	1142.47
1	Deaths	1	Global	3	Both	16	55-59 years	627	Rheumatoid arthritis	2	Percent	2002	0.000530829	0.000595388	0.000465733
1	Deaths	1	Global	3	Both	16	55-59 years	627	Rheumatoid arthritis	3	Rate	2002	0.6097	0.686185	0.527852
1	Deaths	1	Global	3	Both	17	60-64 years	627	Rheumatoid arthritis	1	Number	2002	2267.6	2617.88	1951.4
1	Deaths	1	Global	3	Both	17	60-64 years	627	Rheumatoid arthritis	2	Percent	2002	0.000683103	0.000787343	0.000584494
1	Deaths	1	Global	3	Both	17	60-64 years	627	Rheumatoid arthritis	3	Rate	2002	1.19443	1.37894	1.02787
1	Deaths	1	Global	3	Both	18	65-69 years	627	Rheumatoid arthritis	1	Number	2002	3491.52	4109.07	2932.64
1	Deaths	1	Global	3	Both	18	65-69 years	627	Rheumatoid arthritis	2	Percent	2002	0.000831469	0.000974286	0.000708208
1	Deaths	1	Global	3	Both	18	65-69 years	627	Rheumatoid arthritis	3	Rate	2002	2.20185	2.59129	1.8494
1	Deaths	1	Global	3	Both	19	70-74 years	627	Rheumatoid arthritis	1	Number	2002	4383.6	5005.46	3705.38
1	Deaths	1	Global	3	Both	19	70-74 years	627	Rheumatoid arthritis	2	Percent	2002	0.000863181	0.000990672	0.000734132
1	Deaths	1	Global	3	Both	19	70-74 years	627	Rheumatoid arthritis	3	Rate	2002	3.53507	4.03656	2.98814
1	Deaths	1	Global	3	Both	20	75-79 years	627	Rheumatoid arthritis	1	Number	2002	4784.76	5336.31	4110.56
1	Deaths	1	Global	3	Both	20	75-79 years	627	Rheumatoid arthritis	2	Percent	2002	0.000926542	0.0010331	0.000796438
1	Deaths	1	Global	3	Both	20	75-79 years	627	Rheumatoid arthritis	3	Rate	2002	5.66688	6.3201	4.86837
1	Deaths	1	Global	3	Both	30	80-84 years	627	Rheumatoid arthritis	1	Number	2002	3600.62	4049.15	2973.33
1	Deaths	1	Global	3	Both	30	80-84 years	627	Rheumatoid arthritis	2	Percent	2002	0.000816562	0.000921021	0.000669128
1	Deaths	1	Global	3	Both	30	80-84 years	627	Rheumatoid arthritis	3	Rate	2002	7.69782	8.65675	6.35673
1	Deaths	1	Global	3	Both	31	85-89 years	627	Rheumatoid arthritis	1	Number	2002	2502.87	2807.71	2045.55
1	Deaths	1	Global	3	Both	31	85-89 years	627	Rheumatoid arthritis	2	Percent	2002	0.000735709	0.000827702	0.000600648
1	Deaths	1	Global	3	Both	31	85-89 years	627	Rheumatoid arthritis	3	Rate	2002	11.475	12.8726	9.37832
1	Deaths	1	Global	3	Both	32	90-94 years	627	Rheumatoid arthritis	1	Number	2002	1068.91	1213.34	838.169
1	Deaths	1	Global	3	Both	32	90-94 years	627	Rheumatoid arthritis	2	Percent	2002	0.000598569	0.000680222	0.000471534
1	Deaths	1	Global	3	Both	32	90-94 years	627	Rheumatoid arthritis	3	Rate	2002	13.5824	15.4177	10.6505
1	Deaths	1	Global	3	Both	235	95+ years	627	Rheumatoid arthritis	1	Number	2002	326.405	376.124	250.66
1	Deaths	1	Global	3	Both	235	95+ years	627	Rheumatoid arthritis	2	Percent	2002	0.000539056	0.000621414	0.000414155
1	Deaths	1	Global	3	Both	235	95+ years	627	Rheumatoid arthritis	3	Rate	2002	15.9981	18.4349	12.2856
1	Deaths	1	Global	3	Both	6	5-9 years	627	Rheumatoid arthritis	1	Number	2020	14.7765	18.8735	12.0711
1	Deaths	1	Global	3	Both	6	5-9 years	627	Rheumatoid arthritis	2	Percent	2020	4.04139e-05	5.14774e-05	3.2951e-05
1	Deaths	1	Global	3	Both	6	5-9 years	627	Rheumatoid arthritis	3	Rate	2020	0.0021701	0.0027718	0.00177278
1	Deaths	1	Global	3	Both	7	10-14 years	627	Rheumatoid arthritis	1	Number	2020	24.421	30.811	19.4157
1	Deaths	1	Global	3	Both	7	10-14 years	627	Rheumatoid arthritis	2	Percent	2020	7.98879e-05	0.000103693	6.43934e-05
1	Deaths	1	Global	3	Both	7	10-14 years	627	Rheumatoid arthritis	3	Rate	2020	0.00369724	0.00466466	0.00293945
1	Deaths	1	Global	3	Both	8	15-19 years	627	Rheumatoid arthritis	1	Number	2020	38.3148	48.3335	31.2545
1	Deaths	1	Global	3	Both	8	15-19 years	627	Rheumatoid arthritis	2	Percent	2020	7.03945e-05	8.81671e-05	5.73089e-05
1	Deaths	1	Global	3	Both	8	15-19 years	627	Rheumatoid arthritis	3	Rate	2020	0.00620802	0.00783131	0.00506406
1	Deaths	1	Global	3	Both	9	20-24 years	627	Rheumatoid arthritis	1	Number	2020	47.4105	61.15	38.8796
1	Deaths	1	Global	3	Both	9	20-24 years	627	Rheumatoid arthritis	2	Percent	2020	6.65681e-05	8.60625e-05	5.46876e-05
1	Deaths	1	Global	3	Both	9	20-24 years	627	Rheumatoid arthritis	3	Rate	2020	0.00795692	0.0102628	0.00652519
1	Deaths	1	Global	3	Both	10	25-29 years	627	Rheumatoid arthritis	1	Number	2020	72.6519	90.9318	58.5874
1	Deaths	1	Global	3	Both	10	25-29 years	627	Rheumatoid arthritis	2	Percent	2020	8.95214e-05	0.000110166	7.24577e-05
1	Deaths	1	Global	3	Both	10	25-29 years	627	Rheumatoid arthritis	3	Rate	2020	0.012292	0.0153847	0.0099124
1	Deaths	1	Global	3	Both	11	30-34 years	627	Rheumatoid arthritis	1	Number	2020	123.72	151.829	103.141
1	Deaths	1	Global	3	Both	11	30-34 years	627	Rheumatoid arthritis	2	Percent	2020	0.000119693	0.000145717	9.99519e-05
1	Deaths	1	Global	3	Both	11	30-34 years	627	Rheumatoid arthritis	3	Rate	2020	0.0204822	0.0251358	0.0170753
1	Deaths	1	Global	3	Both	12	35-39 years	627	Rheumatoid arthritis	1	Number	2020	189.457	223.35	157.555
1	Deaths	1	Global	3	Both	12	35-39 years	627	Rheumatoid arthritis	2	Percent	2020	0.000151202	0.000176598	0.000127152
1	Deaths	1	Global	3	Both	12	35-39 years	627	Rheumatoid arthritis	3	Rate	2020	0.0345675	0.0407515	0.0287468
1	Deaths	1	Global	3	Both	13	40-44 years	627	Rheumatoid arthritis	1	Number	2020	309.774	367.192	259.968
1	Deaths	1	Global	3	Both	13	40-44 years	627	Rheumatoid arthritis	2	Percent	2020	0.000192276	0.000227265	0.000161467
1	Deaths	1	Global	3	Both	13	40-44 years	627	Rheumatoid arthritis	3	Rate	2020	0.062683	0.0743014	0.0526046
1	Deaths	1	Global	3	Both	14	45-49 years	627	Rheumatoid arthritis	1	Number	2020	569.332	663.431	482.933
1	Deaths	1	Global	3	Both	14	45-49 years	627	Rheumatoid arthritis	2	Percent	2020	0.000275488	0.000319169	0.000234948
1	Deaths	1	Global	3	Both	14	45-49 years	627	Rheumatoid arthritis	3	Rate	2020	0.120344	0.140235	0.102082
1	Deaths	1	Global	3	Both	15	50-54 years	627	Rheumatoid arthritis	1	Number	2020	989.696	1121.97	834.802
1	Deaths	1	Global	3	Both	15	50-54 years	627	Rheumatoid arthritis	2	Percent	2020	0.000355212	0.000397433	0.000304029
1	Deaths	1	Global	3	Both	15	50-54 years	627	Rheumatoid arthritis	3	Rate	2020	0.225108	0.255195	0.189877
1	Deaths	1	Global	3	Both	16	55-59 years	627	Rheumatoid arthritis	1	Number	2020	1691.85	1929.26	1469.34
1	Deaths	1	Global	3	Both	16	55-59 years	627	Rheumatoid arthritis	2	Percent	2020	0.0004541	0.000516568	0.000398055
1	Deaths	1	Global	3	Both	16	55-59 years	627	Rheumatoid arthritis	3	Rate	2020	0.440462	0.50227	0.382533
1	Deaths	1	Global	3	Both	17	60-64 years	627	Rheumatoid arthritis	1	Number	2020	2773.41	3207.97	2362.02
1	Deaths	1	Global	3	Both	17	60-64 years	627	Rheumatoid arthritis	2	Percent	2020	0.000590172	0.000685819	0.000503872
1	Deaths	1	Global	3	Both	17	60-64 years	627	Rheumatoid arthritis	3	Rate	2020	0.879216	1.01698	0.748799
1	Deaths	1	Global	3	Both	18	65-69 years	627	Rheumatoid arthritis	1	Number	2020	4442.47	5318.45	3718.68
1	Deaths	1	Global	3	Both	18	65-69 years	627	Rheumatoid arthritis	2	Percent	2020	0.000740701	0.000886748	0.000626085
1	Deaths	1	Global	3	Both	18	65-69 years	627	Rheumatoid arthritis	3	Rate	2020	1.64806	1.97303	1.37955
1	Deaths	1	Global	3	Both	19	70-74 years	627	Rheumatoid arthritis	1	Number	2020	5567.66	6565.2	4592.98
1	Deaths	1	Global	3	Both	19	70-74 years	627	Rheumatoid arthritis	2	Percent	2020	0.000835122	0.000981264	0.000689866
1	Deaths	1	Global	3	Both	19	70-74 years	627	Rheumatoid arthritis	3	Rate	2020	2.83997	3.3488	2.34281
1	Deaths	1	Global	3	Both	20	75-79 years	627	Rheumatoid arthritis	1	Number	2020	6332.02	7224.88	5331.72
1	Deaths	1	Global	3	Both	20	75-79 years	627	Rheumatoid arthritis	2	Percent	2020	0.000928556	0.0010545	0.000778585
1	Deaths	1	Global	3	Both	20	75-79 years	627	Rheumatoid arthritis	3	Rate	2020	4.89486	5.58508	4.1216
1	Deaths	1	Global	3	Both	30	80-84 years	627	Rheumatoid arthritis	1	Number	2020	5858.23	6894.23	4610.02
1	Deaths	1	Global	3	Both	30	80-84 years	627	Rheumatoid arthritis	2	Percent	2020	0.000794475	0.000932907	0.000628699
1	Deaths	1	Global	3	Both	30	80-84 years	627	Rheumatoid arthritis	3	Rate	2020	6.79269	7.99395	5.34539
1	Deaths	1	Global	3	Both	31	85-89 years	627	Rheumatoid arthritis	1	Number	2020	4550.56	5488.88	3558.74
1	Deaths	1	Global	3	Both	31	85-89 years	627	Rheumatoid arthritis	2	Percent	2020	0.000734097	0.000873698	0.000573249
1	Deaths	1	Global	3	Both	31	85-89 years	627	Rheumatoid arthritis	3	Rate	2020	10.2047	12.3088	7.98049
1	Deaths	1	Global	3	Both	32	90-94 years	627	Rheumatoid arthritis	1	Number	2020	2223.98	2614.97	1691.81
1	Deaths	1	Global	3	Both	32	90-94 years	627	Rheumatoid arthritis	2	Percent	2020	0.000597272	0.000695991	0.000452062
1	Deaths	1	Global	3	Both	32	90-94 years	627	Rheumatoid arthritis	3	Rate	2020	12.7512	14.993	9.7
1	Deaths	1	Global	3	Both	235	95+ years	627	Rheumatoid arthritis	1	Number	2020	799.414	926.834	578.688
1	Deaths	1	Global	3	Both	235	95+ years	627	Rheumatoid arthritis	2	Percent	2020	0.000520683	0.000600701	0.000379031
1	Deaths	1	Global	3	Both	235	95+ years	627	Rheumatoid arthritis	3	Rate	2020	15.2909	17.7282	11.069
2	DALYs (Disability-Adjusted Life Years)	1	Global	3	Both	1	<5 years	627	Rheumatoid arthritis	1	Number	1996	0	0	0
2	DALYs (Disability-Adjusted Life Years)	1	Global	3	Both	1	<5 years	627	Rheumatoid arthritis	2	Percent	1996	0	0	0
2	DALYs (Disability-Adjusted Life Years)	1	Global	3	Both	1	<5 years	627	Rheumatoid arthritis	3	Rate	1996	0	0	0
2	DALYs (Disability-Adjusted Life Years)	1	Global	3	Both	6	5-9 years	627	Rheumatoid arthritis	1	Number	1996	3998.92	5128.96	3153.05
2	DALYs (Disability-Adjusted Life Years)	1	Global	3	Both	6	5-9 years	627	Rheumatoid arthritis	2	Percent	1996	4.38896e-05	5.71011e-05	3.50831e-05
2	DALYs (Disability-Adjusted Life Years)	1	Global	3	Both	6	5-9 years	627	Rheumatoid arthritis	3	Rate	1996	0.649696	0.833292	0.51227
2	DALYs (Disability-Adjusted Life Years)	1	Global	3	Both	7	10-14 years	627	Rheumatoid arthritis	1	Number	1996	11122.1	17001.6	7367.43
2	DALYs (Disability-Adjusted Life Years)	1	Global	3	Both	7	10-14 years	627	Rheumatoid arthritis	2	Percent	1996	0.000159398	0.000223925	0.000109126
2	DALYs (Disability-Adjusted Life Years)	1	Global	3	Both	7	10-14 years	627	Rheumatoid arthritis	3	Rate	1996	1.88374	2.87956	1.24782
2	DALYs (Disability-Adjusted Life Years)	1	Global	3	Both	8	15-19 years	627	Rheumatoid arthritis	1	Number	1996	24418	36535.2	15897.9
2	DALYs (Disability-Adjusted Life Years)	1	Global	3	Both	8	15-19 years	627	Rheumatoid arthritis	2	Percent	1996	0.000276595	0.000387266	0.000190422
2	DALYs (Disability-Adjusted Life Years)	1	Global	3	Both	8	15-19 years	627	Rheumatoid arthritis	3	Rate	1996	4.60871	6.89574	3.00061
2	DALYs (Disability-Adjusted Life Years)	1	Global	3	Both	9	20-24 years	627	Rheumatoid arthritis	1	Number	1996	42806.1	64762.2	26196.4
2	DALYs (Disability-Adjusted Life Years)	1	Global	3	Both	9	20-24 years	627	Rheumatoid arthritis	2	Percent	1996	0.000416556	0.000616255	0.000277246
2	DALYs (Disability-Adjusted Life Years)	1	Global	3	Both	9	20-24 years	627	Rheumatoid arthritis	3	Rate	1996	8.49546	12.8529	5.19903
2	DALYs (Disability-Adjusted Life Years)	1	Global	3	Both	10	25-29 years	627	Rheumatoid arthritis	1	Number	1996	65964.8	98922.3	42333.3
2	DALYs (Disability-Adjusted Life Years)	1	Global	3	Both	10	25-29 years	627	Rheumatoid arthritis	2	Percent	1996	0.00061501	0.000901595	0.00042631
2	DALYs (Disability-Adjusted Life Years)	1	Global	3	Both	10	25-29 years	627	Rheumatoid arthritis	3	Rate	1996	13.4871	20.2255	8.65539
2	DALYs (Disability-Adjusted Life Years)	1	Global	3	Both	11	30-34 years	627	Rheumatoid arthritis	1	Number	1996	89345.4	131905	61272.8
2	DALYs (Disability-Adjusted Life Years)	1	Global	3	Both	11	30-34 years	627	Rheumatoid arthritis	2	Percent	1996	0.0008139	0.00118914	0.00058295
2	DALYs (Disability-Adjusted Life Years)	1	Global	3	Both	11	30-34 years	627	Rheumatoid arthritis	3	Rate	1996	19.7661	29.1817	13.5555
2	DALYs (Disability-Adjusted Life Years)	1	Global	3	Both	12	35-39 years	627	Rheumatoid arthritis	1	Number	1996	103909	151101	69935.1
2	DALYs (Disability-Adjusted Life Years)	1	Global	3	Both	12	35-39 years	627	Rheumatoid arthritis	2	Percent	1996	0.00096588	0.00136075	0.000697653
2	DALYs (Disability-Adjusted Life Years)	1	Global	3	Both	12	35-39 years	627	Rheumatoid arthritis	3	Rate	1996	27.0185	39.2894	18.1846
2	DALYs (Disability-Adjusted Life Years)	1	Global	3	Both	13	40-44 years	627	Rheumatoid arthritis	1	Number	1996	128860	186163	85013.4
2	DALYs (Disability-Adjusted Life Years)	1	Global	3	Both	13	40-44 years	627	Rheumatoid arthritis	2	Percent	1996	0.00112857	0.0015608	0.000796066
2	DALYs (Disability-Adjusted Life Years)	1	Global	3	Both	13	40-44 years	627	Rheumatoid arthritis	3	Rate	1996	36.7008	53.0212	24.2128
2	DALYs (Disability-Adjusted Life Years)	1	Global	3	Both	14	45-49 years	627	Rheumatoid arthritis	1	Number	1996	139044	194211	97264.9
2	DALYs (Disability-Adjusted Life Years)	1	Global	3	Both	14	45-49 years	627	Rheumatoid arthritis	2	Percent	1996	0.00126765	0.00169426	0.000942137
2	DALYs (Disability-Adjusted Life Years)	1	Global	3	Both	14	45-49 years	627	Rheumatoid arthritis	3	Rate	1996	48.1613	67.2699	33.6902
2	DALYs (Disability-Adjusted Life Years)	1	Global	3	Both	15	50-54 years	627	Rheumatoid arthritis	1	Number	1996	137186	185906	99681.6
2	DALYs (Disability-Adjusted Life Years)	1	Global	3	Both	15	50-54 years	627	Rheumatoid arthritis	2	Percent	1996	0.00129317	0.00166563	0.000991382
2	DALYs (Disability-Adjusted Life Years)	1	Global	3	Both	15	50-54 years	627	Rheumatoid arthritis	3	Rate	1996	61.8992	83.8818	44.9769
2	DALYs (Disability-Adjusted Life Years)	1	Global	3	Both	16	55-59 years	627	Rheumatoid arthritis	1	Number	1996	161602	210447	121705
2	DALYs (Disability-Adjusted Life Years)	1	Global	3	Both	16	55-59 years	627	Rheumatoid arthritis	2	Percent	1996	0.00135007	0.00169141	0.00106429
2	DALYs (Disability-Adjusted Life Years)	1	Global	3	Both	16	55-59 years	627	Rheumatoid arthritis	3	Rate	1996	80.2611	104.52	60.4458
2	DALYs (Disability-Adjusted Life Years)	1	Global	3	Both	17	60-64 years	627	Rheumatoid arthritis	1	Number	1996	186260	234709	146857
2	DALYs (Disability-Adjusted Life Years)	1	Global	3	Both	17	60-64 years	627	Rheumatoid arthritis	2	Percent	1996	0.00144926	0.00176392	0.00118601
2	DALYs (Disability-Adjusted Life Years)	1	Global	3	Both	17	60-64 years	627	Rheumatoid arthritis	3	Rate	1996	106.862	134.658	84.2552
2	DALYs (Disability-Adjusted Life Years)	1	Global	3	Both	18	65-69 years	627	Rheumatoid arthritis	1	Number	1996	194820	241180	157863
2	DALYs (Disability-Adjusted Life Years)	1	Global	3	Both	18	65-69 years	627	Rheumatoid arthritis	2	Percent	1996	0.00148826	0.00176964	0.001243
2	DALYs (Disability-Adjusted Life Years)	1	Global	3	Both	18	65-69 years	627	Rheumatoid arthritis	3	Rate	1996	134.485	166.487	108.973
2	DALYs (Disability-Adjusted Life Years)	1	Global	3	Both	19	70-74 years	627	Rheumatoid arthritis	1	Number	1996	170521	206291	139634
2	DALYs (Disability-Adjusted Life Years)	1	Global	3	Both	19	70-74 years	627	Rheumatoid arthritis	2	Percent	1996	0.00144823	0.00170399	0.00122364
2	DALYs (Disability-Adjusted Life Years)	1	Global	3	Both	19	70-74 years	627	Rheumatoid arthritis	3	Rate	1996	160.914	194.669	131.767
2	DALYs (Disability-Adjusted Life Years)	1	Global	3	Both	20	75-79 years	627	Rheumatoid arthritis	1	Number	1996	120429	142272	99568.1
2	DALYs (Disability-Adjusted Life Years)	1	Global	3	Both	20	75-79 years	627	Rheumatoid arthritis	2	Percent	1996	0.00137519	0.00157828	0.00117829
2	DALYs (Disability-Adjusted Life Years)	1	Global	3	Both	20	75-79 years	627	Rheumatoid arthritis	3	Rate	1996	181.564	214.496	150.114
2	DALYs (Disability-Adjusted Life Years)	1	Global	3	Both	30	80-84 years	627	Rheumatoid arthritis	1	Number	1996	72564.9	84893.8	60580.1
2	DALYs (Disability-Adjusted Life Years)	1	Global	3	Both	30	80-84 years	627	Rheumatoid arthritis	2	Percent	1996	0.00112898	0.00129803	0.00096236
2	DALYs (Disability-Adjusted Life Years)	1	Global	3	Both	30	80-84 years	627	Rheumatoid arthritis	3	Rate	1996	180.212	210.83	150.448
2	DALYs (Disability-Adjusted Life Years)	1	Global	3	Both	31	85-89 years	627	Rheumatoid arthritis	1	Number	1996	35258.4	41254.4	29848.2
2	DALYs (Disability-Adjusted Life Years)	1	Global	3	Both	31	85-89 years	627	Rheumatoid arthritis	2	Percent	1996	0.000960197	0.00110635	0.000835133
2	DALYs (Disability-Adjusted Life Years)	1	Global	3	Both	31	85-89 years	627	Rheumatoid arthritis	3	Rate	1996	185.144	216.63	156.735
2	DALYs (Disability-Adjusted Life Years)	1	Global	3	Both	32	90-94 years	627	Rheumatoid arthritis	1	Number	1996	10900.2	12631.5	9245.43
2	DALYs (Disability-Adjusted Life Years)	1	Global	3	Both	32	90-94 years	627	Rheumatoid arthritis	2	Percent	1996	0.000742724	0.000847557	0.000639951
2	DALYs (Disability-Adjusted Life Years)	1	Global	3	Both	32	90-94 years	627	Rheumatoid arthritis	3	Rate	1996	179.237	207.705	152.027
2	DALYs (Disability-Adjusted Life Years)	1	Global	3	Both	235	95+ years	627	Rheumatoid arthritis	1	Number	1996	2384.48	2736.26	1972
2	DALYs (Disability-Adjusted Life Years)	1	Global	3	Both	235	95+ years	627	Rheumatoid arthritis	2	Percent	1996	0.0005731	0.000650507	0.000481459
2	DALYs (Disability-Adjusted Life Years)	1	Global	3	Both	235	95+ years	627	Rheumatoid arthritis	3	Rate	1996	174.158	199.852	144.031
2	DALYs (Disability-Adjusted Life Years)	1	Global	3	Both	1	<5 years	627	Rheumatoid arthritis	1	Number	1995	0	0	0
2	DALYs (Disability-Adjusted Life Years)	1	Global	3	Both	1	<5 years	627	Rheumatoid arthritis	2	Percent	1995	0	0	0
2	DALYs (Disability-Adjusted Life Years)	1	Global	3	Both	1	<5 years	627	Rheumatoid arthritis	3	Rate	1995	0	0	0
2	DALYs (Disability-Adjusted Life Years)	1	Global	3	Both	6	5-9 years	627	Rheumatoid arthritis	1	Number	1995	4181.59	5363.35	3309.6
2	DALYs (Disability-Adjusted Life Years)	1	Global	3	Both	6	5-9 years	627	Rheumatoid arthritis	2	Percent	1995	4.52522e-05	5.88789e-05	3.64241e-05
2	DALYs (Disability-Adjusted Life Years)	1	Global	3	Both	6	5-9 years	627	Rheumatoid arthritis	3	Rate	1995	0.679211	0.871163	0.537574
2	DALYs (Disability-Adjusted Life Years)	1	Global	3	Both	7	10-14 years	627	Rheumatoid arthritis	1	Number	1995	11042.5	16739.1	7387.9
2	DALYs (Disability-Adjusted Life Years)	1	Global	3	Both	7	10-14 years	627	Rheumatoid arthritis	2	Percent	1995	0.000159501	0.000222627	0.000110078
2	DALYs (Disability-Adjusted Life Years)	1	Global	3	Both	7	10-14 years	627	Rheumatoid arthritis	3	Rate	1995	1.90747	2.89151	1.27618
2	DALYs (Disability-Adjusted Life Years)	1	Global	3	Both	8	15-19 years	627	Rheumatoid arthritis	1	Number	1995	24282.2	35678.1	15752.5
2	DALYs (Disability-Adjusted Life Years)	1	Global	3	Both	8	15-19 years	627	Rheumatoid arthritis	2	Percent	1995	0.000278887	0.000389135	0.000191391
2	DALYs (Disability-Adjusted Life Years)	1	Global	3	Both	8	15-19 years	627	Rheumatoid arthritis	3	Rate	1995	4.6376	6.81406	3.00853
2	DALYs (Disability-Adjusted Life Years)	1	Global	3	Both	9	20-24 years	627	Rheumatoid arthritis	1	Number	1995	43058.8	65490.7	26562.5
2	DALYs (Disability-Adjusted Life Years)	1	Global	3	Both	9	20-24 years	627	Rheumatoid arthritis	2	Percent	1995	0.000420752	0.000626733	0.000280555
2	DALYs (Disability-Adjusted Life Years)	1	Global	3	Both	9	20-24 years	627	Rheumatoid arthritis	3	Rate	1995	8.53586	12.9827	5.26569
2	DALYs (Disability-Adjusted Life Years)	1	Global	3	Both	10	25-29 years	627	Rheumatoid arthritis	1	Number	1995	65698	98578.3	43028.6
2	DALYs (Disability-Adjusted Life Years)	1	Global	3	Both	10	25-29 years	627	Rheumatoid arthritis	2	Percent	1995	0.00061924	0.000905965	0.000436263
2	DALYs (Disability-Adjusted Life Years)	1	Global	3	Both	10	25-29 years	627	Rheumatoid arthritis	3	Rate	1995	13.5558	20.3401	8.87828
2	DALYs (Disability-Adjusted Life Years)	1	Global	3	Both	11	30-34 years	627	Rheumatoid arthritis	1	Number	1995	86813.4	128642	58348.3
2	DALYs (Disability-Adjusted Life Years)	1	Global	3	Both	11	30-34 years	627	Rheumatoid arthritis	2	Percent	1995	0.000807383	0.00116406	0.000572338
2	DALYs (Disability-Adjusted Life Years)	1	Global	3	Both	11	30-34 years	627	Rheumatoid arthritis	3	Rate	1995	19.7417	29.2536	13.2686
2	DALYs (Disability-Adjusted Life Years)	1	Global	3	Both	12	35-39 years	627	Rheumatoid arthritis	1	Number	1995	103271	148983	69368.2
2	DALYs (Disability-Adjusted Life Years)	1	Global	3	Both	12	35-39 years	627	Rheumatoid arthritis	2	Percent	1995	0.000967287	0.00136028	0.00069734
2	DALYs (Disability-Adjusted Life Years)	1	Global	3	Both	12	35-39 years	627	Rheumatoid arthritis	3	Rate	1995	27.2123	39.2574	18.2787
2	DALYs (Disability-Adjusted Life Years)	1	Global	3	Both	13	40-44 years	627	Rheumatoid arthritis	1	Number	1995	126670	181319	85323
2	DALYs (Disability-Adjusted Life Years)	1	Global	3	Both	13	40-44 years	627	Rheumatoid arthritis	2	Percent	1995	0.00112173	0.00155508	0.000795415
2	DALYs (Disability-Adjusted Life Years)	1	Global	3	Both	13	40-44 years	627	Rheumatoid arthritis	3	Rate	1995	36.8893	52.8043	24.8481
2	DALYs (Disability-Adjusted Life Years)	1	Global	3	Both	14	45-49 years	627	Rheumatoid arthritis	1	Number	1995	133127	184758	94175.4
2	DALYs (Disability-Adjusted Life Years)	1	Global	3	Both	14	45-49 years	627	Rheumatoid arthritis	2	Percent	1995	0.0012606	0.00168968	0.000934694
2	DALYs (Disability-Adjusted Life Years)	1	Global	3	Both	14	45-49 years	627	Rheumatoid arthritis	3	Rate	1995	48.3057	67.0402	34.172
2	DALYs (Disability-Adjusted Life Years)	1	Global	3	Both	15	50-54 years	627	Rheumatoid arthritis	1	Number	1995	136004	185444	98641.5
2	DALYs (Disability-Adjusted Life Years)	1	Global	3	Both	15	50-54 years	627	Rheumatoid arthritis	2	Percent	1995	0.00128025	0.00165398	0.000975667
2	DALYs (Disability-Adjusted Life Years)	1	Global	3	Both	15	50-54 years	627	Rheumatoid arthritis	3	Rate	1995	62.1685	84.7677	45.0896
2	DALYs (Disability-Adjusted Life Years)	1	Global	3	Both	16	55-59 years	627	Rheumatoid arthritis	1	Number	1995	161421	210508	123222
2	DALYs (Disability-Adjusted Life Years)	1	Global	3	Both	16	55-59 years	627	Rheumatoid arthritis	2	Percent	1995	0.00134014	0.00168224	0.00105744
2	DALYs (Disability-Adjusted Life Years)	1	Global	3	Both	16	55-59 years	627	Rheumatoid arthritis	3	Rate	1995	80.8942	105.493	61.7511
2	DALYs (Disability-Adjusted Life Years)	1	Global	3	Both	17	60-64 years	627	Rheumatoid arthritis	1	Number	1995	185361	234544	144911
2	DALYs (Disability-Adjusted Life Years)	1	Global	3	Both	17	60-64 years	627	Rheumatoid arthritis	2	Percent	1995	0.00144061	0.00175118	0.00117709
2	DALYs (Disability-Adjusted Life Years)	1	Global	3	Both	17	60-64 years	627	Rheumatoid arthritis	3	Rate	1995	107.899	136.529	84.3533
2	DALYs (Disability-Adjusted Life Years)	1	Global	3	Both	18	65-69 years	627	Rheumatoid arthritis	1	Number	1995	192571	238315	156157
2	DALYs (Disability-Adjusted Life Years)	1	Global	3	Both	18	65-69 years	627	Rheumatoid arthritis	2	Percent	1995	0.00148576	0.00177782	0.00124794
2	DALYs (Disability-Adjusted Life Years)	1	Global	3	Both	18	65-69 years	627	Rheumatoid arthritis	3	Rate	1995	135.605	167.818	109.963
2	DALYs (Disability-Adjusted Life Years)	1	Global	3	Both	19	70-74 years	627	Rheumatoid arthritis	1	Number	1995	167783	202783	137409
2	DALYs (Disability-Adjusted Life Years)	1	Global	3	Both	19	70-74 years	627	Rheumatoid arthritis	2	Percent	1995	0.00145089	0.00170072	0.00122861
2	DALYs (Disability-Adjusted Life Years)	1	Global	3	Both	19	70-74 years	627	Rheumatoid arthritis	3	Rate	1995	163.382	197.464	133.805
2	DALYs (Disability-Adjusted Life Years)	1	Global	3	Both	20	75-79 years	627	Rheumatoid arthritis	1	Number	1995	116975	138281	96278.9
2	DALYs (Disability-Adjusted Life Years)	1	Global	3	Both	20	75-79 years	627	Rheumatoid arthritis	2	Percent	1995	0.00136612	0.00156608	0.00116621
2	DALYs (Disability-Adjusted Life Years)	1	Global	3	Both	20	75-79 years	627	Rheumatoid arthritis	3	Rate	1995	183.329	216.72	150.893
2	DALYs (Disability-Adjusted Life Years)	1	Global	3	Both	30	80-84 years	627	Rheumatoid arthritis	1	Number	1995	72628.6	84833.9	60415.5
2	DALYs (Disability-Adjusted Life Years)	1	Global	3	Both	30	80-84 years	627	Rheumatoid arthritis	2	Percent	1995	0.00112275	0.00128847	0.000957733
2	DALYs (Disability-Adjusted Life Years)	1	Global	3	Both	30	80-84 years	627	Rheumatoid arthritis	3	Rate	1995	181.208	211.66	150.736
2	DALYs (Disability-Adjusted Life Years)	1	Global	3	Both	31	85-89 years	627	Rheumatoid arthritis	1	Number	1995	34663	40276.5	29305.6
2	DALYs (Disability-Adjusted Life Years)	1	Global	3	Both	31	85-89 years	627	Rheumatoid arthritis	2	Percent	1995	0.000964545	0.00111017	0.000837462
2	DALYs (Disability-Adjusted Life Years)	1	Global	3	Both	31	85-89 years	627	Rheumatoid arthritis	3	Rate	1995	188.15	218.62	159.07
2	DALYs (Disability-Adjusted Life Years)	1	Global	3	Both	32	90-94 years	627	Rheumatoid arthritis	1	Number	1995	10470.5	12102.8	8892.52
2	DALYs (Disability-Adjusted Life Years)	1	Global	3	Both	32	90-94 years	627	Rheumatoid arthritis	2	Percent	1995	0.000742061	0.000848619	0.000638367
2	DALYs (Disability-Adjusted Life Years)	1	Global	3	Both	32	90-94 years	627	Rheumatoid arthritis	3	Rate	1995	180.914	209.118	153.65
2	DALYs (Disability-Adjusted Life Years)	1	Global	3	Both	235	95+ years	627	Rheumatoid arthritis	1	Number	1995	2286.34	2627.76	1893.07
2	DALYs (Disability-Adjusted Life Years)	1	Global	3	Both	235	95+ years	627	Rheumatoid arthritis	2	Percent	1995	0.000580903	0.000663047	0.00048822
2	DALYs (Disability-Adjusted Life Years)	1	Global	3	Both	235	95+ years	627	Rheumatoid arthritis	3	Rate	1995	178.584	205.252	147.866
2	DALYs (Disability-Adjusted Life Years)	1	Global	3	Both	1	<5 years	627	Rheumatoid arthritis	1	Number	1993	0	0	0
2	DALYs (Disability-Adjusted Life Years)	1	Global	3	Both	1	<5 years	627	Rheumatoid arthritis	2	Percent	1993	0	0	0
2	DALYs (Disability-Adjusted Life Years)	1	Global	3	Both	1	<5 years	627	Rheumatoid arthritis	3	Rate	1993	0	0	0
2	DALYs (Disability-Adjusted Life Years)	1	Global	3	Both	6	5-9 years	627	Rheumatoid arthritis	1	Number	1993	4536.72	5772.75	3688.4
2	DALYs (Disability-Adjusted Life Years)	1	Global	3	Both	6	5-9 years	627	Rheumatoid arthritis	2	Percent	1993	4.86142e-05	6.10383e-05	3.97818e-05
2	DALYs (Disability-Adjusted Life Years)	1	Global	3	Both	6	5-9 years	627	Rheumatoid arthritis	3	Rate	1993	0.74542	0.948511	0.606035
2	DALYs (Disability-Adjusted Life Years)	1	Global	3	Both	7	10-14 years	627	Rheumatoid arthritis	1	Number	1993	11030.2	16481.8	7475.83
2	DALYs (Disability-Adjusted Life Years)	1	Global	3	Both	7	10-14 years	627	Rheumatoid arthritis	2	Percent	1993	0.000163154	0.00022454	0.000113593
2	DALYs (Disability-Adjusted Life Years)	1	Global	3	Both	7	10-14 years	627	Rheumatoid arthritis	3	Rate	1993	1.97485	2.95091	1.33847
2	DALYs (Disability-Adjusted Life Years)	1	Global	3	Both	8	15-19 years	627	Rheumatoid arthritis	1	Number	1993	24429.1	36248.3	16053.9
2	DALYs (Disability-Adjusted Life Years)	1	Global	3	Both	8	15-19 years	627	Rheumatoid arthritis	2	Percent	1993	0.000282729	0.000393603	0.000196429
2	DALYs (Disability-Adjusted Life Years)	1	Global	3	Both	8	15-19 years	627	Rheumatoid arthritis	3	Rate	1993	4.72235	7.00711	3.10335
2	DALYs (Disability-Adjusted Life Years)	1	Global	3	Both	9	20-24 years	627	Rheumatoid arthritis	1	Number	1993	43555.1	65264.9	26871.6
2	DALYs (Disability-Adjusted Life Years)	1	Global	3	Both	9	20-24 years	627	Rheumatoid arthritis	2	Percent	1993	0.000430783	0.000629209	0.00028275
2	DALYs (Disability-Adjusted Life Years)	1	Global	3	Both	9	20-24 years	627	Rheumatoid arthritis	3	Rate	1993	8.65657	12.9714	5.34073
2	DALYs (Disability-Adjusted Life Years)	1	Global	3	Both	10	25-29 years	627	Rheumatoid arthritis	1	Number	1993	65419.5	97012.3	42592.9
2	DALYs (Disability-Adjusted Life Years)	1	Global	3	Both	10	25-29 years	627	Rheumatoid arthritis	2	Percent	1993	0.000635903	0.000915746	0.000443905
2	DALYs (Disability-Adjusted Life Years)	1	Global	3	Both	10	25-29 years	627	Rheumatoid arthritis	3	Rate	1993	13.779	20.4332	8.97113
2	DALYs (Disability-Adjusted Life Years)	1	Global	3	Both	11	30-34 years	627	Rheumatoid arthritis	1	Number	1993	81108.4	119760	54851.3
2	DALYs (Disability-Adjusted Life Years)	1	Global	3	Both	11	30-34 years	627	Rheumatoid arthritis	2	Percent	1993	0.000805735	0.00115136	0.000570729
2	DALYs (Disability-Adjusted Life Years)	1	Global	3	Both	11	30-34 years	627	Rheumatoid arthritis	3	Rate	1993	19.7182	29.1147	13.3348
2	DALYs (Disability-Adjusted Life Years)	1	Global	3	Both	12	35-39 years	627	Rheumatoid arthritis	1	Number	1993	102991	148772	69951.8
2	DALYs (Disability-Adjusted Life Years)	1	Global	3	Both	12	35-39 years	627	Rheumatoid arthritis	2	Percent	1993	0.000996695	0.00139151	0.000723586
2	DALYs (Disability-Adjusted Life Years)	1	Global	3	Both	12	35-39 years	627	Rheumatoid arthritis	3	Rate	1993	27.5886	39.8523	18.7383
2	DALYs (Disability-Adjusted Life Years)	1	Global	3	Both	13	40-44 years	627	Rheumatoid arthritis	1	Number	1993	119248	170594	79249.8
2	DALYs (Disability-Adjusted Life Years)	1	Global	3	Both	13	40-44 years	627	Rheumatoid arthritis	2	Percent	1993	0.00113404	0.00156492	0.000805176
2	DALYs (Disability-Adjusted Life Years)	1	Global	3	Both	13	40-44 years	627	Rheumatoid arthritis	3	Rate	1993	37.0491	53.0015	24.622
2	DALYs (Disability-Adjusted Life Years)	1	Global	3	Both	14	45-49 years	627	Rheumatoid arthritis	1	Number	1993	121453	168884	85793.1
2	DALYs (Disability-Adjusted Life Years)	1	Global	3	Both	14	45-49 years	627	Rheumatoid arthritis	2	Percent	1993	0.00125536	0.00167929	0.000931204
2	DALYs (Disability-Adjusted Life Years)	1	Global	3	Both	14	45-49 years	627	Rheumatoid arthritis	3	Rate	1993	48.0899	66.8705	33.9703
2	DALYs (Disability-Adjusted Life Years)	1	Global	3	Both	15	50-54 years	627	Rheumatoid arthritis	1	Number	1993	135441	182236	98775.6
2	DALYs (Disability-Adjusted Life Years)	1	Global	3	Both	15	50-54 years	627	Rheumatoid arthritis	2	Percent	1993	0.00126622	0.00163572	0.000966918
2	DALYs (Disability-Adjusted Life Years)	1	Global	3	Both	15	50-54 years	627	Rheumatoid arthritis	3	Rate	1993	62.346	83.8864	45.4682
2	DALYs (Disability-Adjusted Life Years)	1	Global	3	Both	16	55-59 years	627	Rheumatoid arthritis	1	Number	1993	157399	204269	120041
2	DALYs (Disability-Adjusted Life Years)	1	Global	3	Both	16	55-59 years	627	Rheumatoid arthritis	2	Percent	1993	0.00133891	0.00167666	0.00106124
2	DALYs (Disability-Adjusted Life Years)	1	Global	3	Both	16	55-59 years	627	Rheumatoid arthritis	3	Rate	1993	81.0306	105.16	61.7984
2	DALYs (Disability-Adjusted Life Years)	1	Global	3	Both	17	60-64 years	627	Rheumatoid arthritis	1	Number	1993	181587	227729	142930
2	DALYs (Disability-Adjusted Life Years)	1	Global	3	Both	17	60-64 years	627	Rheumatoid arthritis	2	Percent	1993	0.00142355	0.00172551	0.00115999
2	DALYs (Disability-Adjusted Life Years)	1	Global	3	Both	17	60-64 years	627	Rheumatoid arthritis	3	Rate	1993	107.923	135.347	84.9482
2	DALYs (Disability-Adjusted Life Years)	1	Global	3	Both	18	65-69 years	627	Rheumatoid arthritis	1	Number	1993	185164	229947	149797
2	DALYs (Disability-Adjusted Life Years)	1	Global	3	Both	18	65-69 years	627	Rheumatoid arthritis	2	Percent	1993	0.0014924	0.00177709	0.00124647
2	DALYs (Disability-Adjusted Life Years)	1	Global	3	Both	18	65-69 years	627	Rheumatoid arthritis	3	Rate	1993	137.015	170.153	110.844
2	DALYs (Disability-Adjusted Life Years)	1	Global	3	Both	19	70-74 years	627	Rheumatoid arthritis	1	Number	1993	155679	188193	127744
2	DALYs (Disability-Adjusted Life Years)	1	Global	3	Both	19	70-74 years	627	Rheumatoid arthritis	2	Percent	1993	0.00143707	0.00169154	0.00121129
2	DALYs (Disability-Adjusted Life Years)	1	Global	3	Both	19	70-74 years	627	Rheumatoid arthritis	3	Rate	1993	163.203	197.288	133.918
2	DALYs (Disability-Adjusted Life Years)	1	Global	3	Both	20	75-79 years	627	Rheumatoid arthritis	1	Number	1993	113048	133291	93781.9
2	DALYs (Disability-Adjusted Life Years)	1	Global	3	Both	20	75-79 years	627	Rheumatoid arthritis	2	Percent	1993	0.00134559	0.00155707	0.00115119
2	DALYs (Disability-Adjusted Life Years)	1	Global	3	Both	20	75-79 years	627	Rheumatoid arthritis	3	Rate	1993	183.335	216.163	152.09
2	DALYs (Disability-Adjusted Life Years)	1	Global	3	Both	30	80-84 years	627	Rheumatoid arthritis	1	Number	1993	68903.2	80449.4	57847.5
2	DALYs (Disability-Adjusted Life Years)	1	Global	3	Both	30	80-84 years	627	Rheumatoid arthritis	2	Percent	1993	0.00110573	0.00126477	0.000941616
2	DALYs (Disability-Adjusted Life Years)	1	Global	3	Both	30	80-84 years	627	Rheumatoid arthritis	3	Rate	1993	178.641	208.576	149.978
2	DALYs (Disability-Adjusted Life Years)	1	Global	3	Both	31	85-89 years	627	Rheumatoid arthritis	1	Number	1993	32546.5	37717.8	27759.3
2	DALYs (Disability-Adjusted Life Years)	1	Global	3	Both	31	85-89 years	627	Rheumatoid arthritis	2	Percent	1993	0.000966073	0.00110039	0.000842496
2	DALYs (Disability-Adjusted Life Years)	1	Global	3	Both	31	85-89 years	627	Rheumatoid arthritis	3	Rate	1993	189.118	219.166	161.301
2	DALYs (Disability-Adjusted Life Years)	1	Global	3	Both	32	90-94 years	627	Rheumatoid arthritis	1	Number	1993	9408.55	10828.7	7952.38
[truncated: 5,585 more rows]

## Sheet: country
measure_id	measure_name	location_id	location_name	sex_id	sex_name	age_id	age_name	cause_id	cause_name	metric_id	metric_name	year	val	upper	lower
1	Deaths	178	Eritrea	3	Both	22	All ages	627	Rheumatoid arthritis	1	Number	1990	0.379655	3.31972	0.110897
1	Deaths	178	Eritrea	3	Both	22	All ages	627	Rheumatoid arthritis	2	Percent	1990	6.82024e-06	5.99538e-05	2.02169e-06
1	Deaths	178	Eritrea	3	Both	22	All ages	627	Rheumatoid arthritis	3	Rate	1990	0.0111469	0.0974685	0.00325599
1	Deaths	178	Eritrea	3	Both	27	Age-standardized	627	Rheumatoid arthritis	3	Rate	1990	0.0441429	0.397251	0.01253
1	Deaths	15	Myanmar	3	Both	22	All ages	627	Rheumatoid arthritis	1	Number	1990	58.0315	79.1412	34.9666
1	Deaths	15	Myanmar	3	Both	22	All ages	627	Rheumatoid arthritis	2	Percent	1990	0.000116394	0.00015446	7.4319e-05
1	Deaths	15	Myanmar	3	Both	22	All ages	627	Rheumatoid arthritis	3	Rate	1990	0.143506	0.195708	0.0864687
1	Deaths	15	Myanmar	3	Both	27	Age-standardized	627	Rheumatoid arthritis	3	Rate	1990	0.322763	0.434285	0.182795
1	Deaths	113	Guyana	3	Both	22	All ages	627	Rheumatoid arthritis	1	Number	1990	0.0673062	0.0773352	0.0584755
1	Deaths	113	Guyana	3	Both	22	All ages	627	Rheumatoid arthritis	2	Percent	1990	1.06717e-05	1.21485e-05	9.4236e-06
1	Deaths	113	Guyana	3	Both	22	All ages	627	Rheumatoid arthritis	3	Rate	1990	0.00863271	0.00991904	0.00750008
1	Deaths	113	Guyana	3	Both	27	Age-standardized	627	Rheumatoid arthritis	3	Rate	1990	0.0217918	0.0252124	0.0188989
1	Deaths	16	Philippines	3	Both	22	All ages	627	Rheumatoid arthritis	1	Number	1990	89.1361	106.138	54.0449
1	Deaths	16	Philippines	3	Both	22	All ages	627	Rheumatoid arthritis	2	Percent	1990	0.000247305	0.000292669	0.000151502
1	Deaths	16	Philippines	3	Both	22	All ages	627	Rheumatoid arthritis	3	Rate	1990	0.141467	0.16845	0.085774
1	Deaths	16	Philippines	3	Both	27	Age-standardized	627	Rheumatoid arthritis	3	Rate	1990	0.455584	0.538685	0.257095
1	Deaths	196	South Africa	3	Both	22	All ages	627	Rheumatoid arthritis	1	Number	1990	219.483	263.354	165.031
1	Deaths	196	South Africa	3	Both	22	All ages	627	Rheumatoid arthritis	2	Percent	1990	0.000750372	0.000887023	0.000567408
1	Deaths	196	South Africa	3	Both	22	All ages	627	Rheumatoid arthritis	3	Rate	1990	0.592987	0.711515	0.445871
1	Deaths	196	South Africa	3	Both	27	Age-standardized	627	Rheumatoid arthritis	3	Rate	1990	1.05798	1.28957	0.78475
1	Deaths	81	Germany	3	Both	22	All ages	627	Rheumatoid arthritis	1	Number	1990	684.74	766.578	592.163
1	Deaths	81	Germany	3	Both	22	All ages	627	Rheumatoid arthritis	2	Percent	1990	0.000747484	0.000837184	0.000646472
1	Deaths	81	Germany	3	Both	22	All ages	627	Rheumatoid arthritis	3	Rate	1990	0.856559	0.958933	0.740752
1	Deaths	81	Germany	3	Both	27	Age-standardized	627	Rheumatoid arthritis	3	Rate	1990	0.518704	0.575607	0.449224
1	Deaths	162	Bhutan	3	Both	22	All ages	627	Rheumatoid arthritis	1	Number	1990	1.6658	2.36519	0.874823
1	Deaths	162	Bhutan	3	Both	22	All ages	627	Rheumatoid arthritis	2	Percent	1990	0.000297554	0.000420471	0.000162828
1	Deaths	162	Bhutan	3	Both	22	All ages	627	Rheumatoid arthritis	3	Rate	1990	0.26439	0.375394	0.138849
1	Deaths	162	Bhutan	3	Both	27	Age-standardized	627	Rheumatoid arthritis	3	Rate	1990	1.00743	1.46031	0.5466
1	Deaths	48	Hungary	3	Both	22	All ages	627	Rheumatoid arthritis	1	Number	1990	92.4929	103.965	83.3828
1	Deaths	48	Hungary	3	Both	22	All ages	627	Rheumatoid arthritis	2	Percent	1990	0.000637619	0.000718386	0.000575067
1	Deaths	48	Hungary	3	Both	22	All ages	627	Rheumatoid arthritis	3	Rate	1990	0.889787	1.00015	0.802148
1	Deaths	48	Hungary	3	Both	27	Age-standardized	627	Rheumatoid arthritis	3	Rate	1990	0.628212	0.700497	0.568004
1	Deaths	114	Haiti	3	Both	27	Age-standardized	627	Rheumatoid arthritis	3	Rate	1990	0.819481	1.30961	0.488012
1	Deaths	97	Argentina	3	Both	22	All ages	627	Rheumatoid arthritis	1	Number	1990	120.973	132.1	111.143
1	Deaths	97	Argentina	3	Both	22	All ages	627	Rheumatoid arthritis	2	Percent	1990	0.000477213	0.00052134	0.000438284
1	Deaths	97	Argentina	3	Both	22	All ages	627	Rheumatoid arthritis	3	Rate	1990	0.365354	0.398961	0.335668
1	Deaths	97	Argentina	3	Both	27	Age-standardized	627	Rheumatoid arthritis	3	Rate	1990	0.387553	0.423568	0.355104
1	Deaths	416	Tuvalu	3	Both	22	All ages	627	Rheumatoid arthritis	1	Number	1990	0.000136052	0.000470142	6.16209e-05
1	Deaths	416	Tuvalu	3	Both	22	All ages	627	Rheumatoid arthritis	2	Percent	1990	1.19083e-06	4.16216e-06	5.68055e-07
1	Deaths	416	Tuvalu	3	Both	22	All ages	627	Rheumatoid arthritis	3	Rate	1990	0.00143029	0.00494254	0.000647812
1	Deaths	416	Tuvalu	3	Both	27	Age-standardized	627	Rheumatoid arthritis	3	Rate	1990	0.00201579	0.00718786	0.000898823
1	Deaths	90	Norway	3	Both	22	All ages	627	Rheumatoid arthritis	1	Number	1991	106.819	113.699	96.1009
1	Deaths	90	Norway	3	Both	22	All ages	627	Rheumatoid arthritis	2	Percent	1991	0.00236342	0.002517	0.00212518
1	Deaths	90	Norway	3	Both	22	All ages	627	Rheumatoid arthritis	3	Rate	1991	2.50415	2.66543	2.25289
1	Deaths	90	Norway	3	Both	27	Age-standardized	627	Rheumatoid arthritis	3	Rate	1991	1.40655	1.49406	1.27419
1	Deaths	298	American Samoa	3	Both	22	All ages	627	Rheumatoid arthritis	1	Number	1990	0.00072906	0.00102171	0.00047394
1	Deaths	298	American Samoa	3	Both	22	All ages	627	Rheumatoid arthritis	2	Percent	1990	3.23436e-06	4.58443e-06	2.10066e-06
1	Deaths	298	American Samoa	3	Both	22	All ages	627	Rheumatoid arthritis	3	Rate	1990	0.00150312	0.00210649	0.000977132
1	Deaths	298	American Samoa	3	Both	27	Age-standardized	627	Rheumatoid arthritis	3	Rate	1990	0.00337505	0.00471574	0.00220383
1	Deaths	41	Uzbekistan	3	Both	22	All ages	627	Rheumatoid arthritis	1	Number	1991	7.39204	13.4702	5.74885
1	Deaths	41	Uzbekistan	3	Both	22	All ages	627	Rheumatoid arthritis	2	Percent	1991	5.49133e-05	0.000101694	4.29104e-05
1	Deaths	41	Uzbekistan	3	Both	22	All ages	627	Rheumatoid arthritis	3	Rate	1991	0.0344858	0.0628418	0.0268199
1	Deaths	41	Uzbekistan	3	Both	27	Age-standardized	627	Rheumatoid arthritis	3	Rate	1991	0.0731155	0.137994	0.0565807
1	Deaths	155	T眉rkiye	3	Both	22	All ages	627	Rheumatoid arthritis	1	Number	1991	172.242	224.014	121.142
1	Deaths	155	T眉rkiye	3	Both	22	All ages	627	Rheumatoid arthritis	2	Percent	1991	0.000448741	0.000576092	0.000327704
1	Deaths	155	T眉rkiye	3	Both	22	All ages	627	Rheumatoid arthritis	3	Rate	1991	0.294181	0.382606	0.206904
1	Deaths	155	T眉rkiye	3	Both	27	Age-standardized	627	Rheumatoid arthritis	3	Rate	1991	0.494292	0.660119	0.340277
1	Deaths	212	Mauritania	3	Both	22	All ages	627	Rheumatoid arthritis	1	Number	1990	0.0993418	0.206298	0.0387359
1	Deaths	212	Mauritania	3	Both	22	All ages	627	Rheumatoid arthritis	2	Percent	1990	4.68224e-06	9.76628e-06	1.78403e-06
1	Deaths	212	Mauritania	3	Both	22	All ages	627	Rheumatoid arthritis	3	Rate	1990	0.00483506	0.0100407	0.00188531
1	Deaths	212	Mauritania	3	Both	27	Age-standardized	627	Rheumatoid arthritis	3	Rate	1990	0.011303	0.0228953	0.00441005
1	Deaths	205	C么te d'Ivoire	3	Both	22	All ages	627	Rheumatoid arthritis	1	Number	1991	0.168335	0.31773	0.0795069
1	Deaths	205	C么te d'Ivoire	3	Both	22	All ages	627	Rheumatoid arthritis	2	Percent	1991	1.12543e-06	2.1175e-06	5.35286e-07
1	Deaths	205	C么te d'Ivoire	3	Both	22	All ages	627	Rheumatoid arthritis	3	Rate	1991	0.00132836	0.00250726	0.000627403
1	Deaths	205	C么te d'Ivoire	3	Both	27	Age-standardized	627	Rheumatoid arthritis	3	Rate	1991	0.00755875	0.013811	0.00351872
1	Deaths	17	Sri Lanka	3	Both	22	All ages	627	Rheumatoid arthritis	1	Number	1994	3.45468	4.75947	2.81103
1	Deaths	17	Sri Lanka	3	Both	22	All ages	627	Rheumatoid arthritis	2	Percent	1994	3.50388e-05	4.81969e-05	2.85449e-05
1	Deaths	17	Sri Lanka	3	Both	22	All ages	627	Rheumatoid arthritis	3	Rate	1994	0.019381	0.026701	0.0157701
1	Deaths	17	Sri Lanka	3	Both	27	Age-standardized	627	Rheumatoid arthritis	3	Rate	1994	0.0346631	0.0482741	0.0281033
1	Deaths	25	Micronesia (Federated States of)	3	Both	22	All ages	627	Rheumatoid arthritis	1	Number	1991	0.00101814	0.00290305	0.000496655
1	Deaths	25	Micronesia (Federated States of)	3	Both	22	All ages	627	Rheumatoid arthritis	2	Percent	1991	1.26082e-06	3.48092e-06	6.46663e-07
1	Deaths	25	Micronesia (Federated States of)	3	Both	22	All ages	627	Rheumatoid arthritis	3	Rate	1991	0.000972053	0.00277164	0.000474174
1	Deaths	25	Micronesia (Federated States of)	3	Both	27	Age-standardized	627	Rheumatoid arthritis	3	Rate	1991	0.00203718	0.00609432	0.000984219
1	Deaths	147	Libya	3	Both	22	All ages	627	Rheumatoid arthritis	1	Number	1990	1.04532	1.53531	0.676247
1	Deaths	147	Libya	3	Both	22	All ages	627	Rheumatoid arthritis	2	Percent	1990	5.61838e-05	8.11542e-05	3.79194e-05
1	Deaths	147	Libya	3	Both	22	All ages	627	Rheumatoid arthritis	3	Rate	1990	0.0247999	0.0364247	0.0160438
1	Deaths	147	Libya	3	Both	27	Age-standardized	627	Rheumatoid arthritis	3	Rate	1990	0.0536686	0.0820202	0.0350803
1	Deaths	82	Greece	3	Both	22	All ages	627	Rheumatoid arthritis	1	Number	1990	25.0879	27.193	22.9507
1	Deaths	82	Greece	3	Both	22	All ages	627	Rheumatoid arthritis	2	Percent	1990	0.000267827	0.000290444	0.000246014
1	Deaths	82	Greece	3	Both	22	All ages	627	Rheumatoid arthritis	3	Rate	1990	0.241478	0.261741	0.220907
1	Deaths	82	Greece	3	Both	27	Age-standardized	627	Rheumatoid arthritis	3	Rate	1990	0.165288	0.179042	0.150395
1	Deaths	74	Andorra	3	Both	22	All ages	627	Rheumatoid arthritis	1	Number	1991	0.0449861	0.0642083	0.0290139
1	Deaths	74	Andorra	3	Both	22	All ages	627	Rheumatoid arthritis	2	Percent	1991	0.000149998	0.000192655	0.00010852
1	Deaths	74	Andorra	3	Both	22	All ages	627	Rheumatoid arthritis	3	Rate	1991	0.0765404	0.109246	0.049365
1	Deaths	74	Andorra	3	Both	27	Age-standardized	627	Rheumatoid arthritis	3	Rate	1991	0.0813356	0.116366	0.0526797
1	Deaths	139	Algeria	3	Both	22	All ages	627	Rheumatoid arthritis	1	Number	1991	7.12699	10.0741	4.78967
1	Deaths	139	Algeria	3	Both	22	All ages	627	Rheumatoid arthritis	2	Percent	1991	5.3748e-05	7.78987e-05	3.68719e-05
1	Deaths	139	Algeria	3	Both	22	All ages	627	Rheumatoid arthritis	3	Rate	1991	0.0274687	0.0388275	0.0184603
1	Deaths	139	Algeria	3	Both	27	Age-standardized	627	Rheumatoid arthritis	3	Rate	1991	0.0546309	0.0786805	0.0363105
1	Deaths	91	Portugal	3	Both	22	All ages	627	Rheumatoid arthritis	1	Number	1991	73.9495	79.9927	66.8562
1	Deaths	91	Portugal	3	Both	22	All ages	627	Rheumatoid arthritis	2	Percent	1991	0.000719505	0.000778283	0.000650298
1	Deaths	91	Portugal	3	Both	22	All ages	627	Rheumatoid arthritis	3	Rate	1991	0.729488	0.789103	0.659515
1	Deaths	91	Portugal	3	Both	27	Age-standardized	627	Rheumatoid arthritis	3	Rate	1991	0.531883	0.573975	0.482848
1	Deaths	49	North Macedonia	3	Both	22	All ages	627	Rheumatoid arthritis	1	Number	1990	1.38993	1.86569	0.997643
1	Deaths	49	North Macedonia	3	Both	22	All ages	627	Rheumatoid arthritis	2	Percent	1990	8.3329e-05	0.000111046	5.9813e-05
1	Deaths	49	North Macedonia	3	Both	22	All ages	627	Rheumatoid arthritis	3	Rate	1990	0.0697649	0.0936446	0.0500747
1	Deaths	49	North Macedonia	3	Both	27	Age-standardized	627	Rheumatoid arthritis	3	Rate	1990	0.0795018	0.105862	0.0562992
1	Deaths	163	India	3	Both	22	All ages	627	Rheumatoid arthritis	1	Number	1990	2909.35	4204.93	2004.69
1	Deaths	163	India	3	Both	22	All ages	627	Rheumatoid arthritis	2	Percent	1990	0.000372017	0.000542503	0.000258214
1	Deaths	163	India	3	Both	22	All ages	627	Rheumatoid arthritis	3	Rate	1990	0.341046	0.49292	0.234998
1	Deaths	163	India	3	Both	27	Age-standardized	627	Rheumatoid arthritis	3	Rate	1990	0.858576	1.2736	0.579435
1	Deaths	140	Bahrain	3	Both	22	All ages	627	Rheumatoid arthritis	1	Number	1991	0.0658482	0.0976575	0.0481842
1	Deaths	140	Bahrain	3	Both	22	All ages	627	Rheumatoid arthritis	2	Percent	1991	3.15572e-05	4.7401e-05	2.33052e-05
1	Deaths	140	Bahrain	3	Both	22	All ages	627	Rheumatoid arthritis	3	Rate	1991	0.0125986	0.0186847	0.00921901
1	Deaths	140	Bahrain	3	Both	27	Age-standardized	627	Rheumatoid arthritis	3	Rate	1991	0.039481	0.0584402	0.029387
1	Deaths	34	Azerbaijan	3	Both	22	All ages	627	Rheumatoid arthritis	1	Number	1992	0.234466	0.314292	0.164431
1	Deaths	34	Azerbaijan	3	Both	22	All ages	627	Rheumatoid arthritis	2	Percent	1992	3.62115e-06	4.8568e-06	2.56707e-06
1	Deaths	34	Azerbaijan	3	Both	22	All ages	627	Rheumatoid arthritis	3	Rate	1992	0.00310513	0.0041623	0.00217762
1	Deaths	34	Azerbaijan	3	Both	27	Age-standardized	627	Rheumatoid arthritis	3	Rate	1992	0.00517969	0.00731546	0.00342665
1	Deaths	115	Jamaica	3	Both	22	All ages	627	Rheumatoid arthritis	1	Number	1990	5.27287	5.95261	4.55121
1	Deaths	115	Jamaica	3	Both	22	All ages	627	Rheumatoid arthritis	2	Percent	1990	0.00040632	0.000459596	0.000349621
1	Deaths	115	Jamaica	3	Both	22	All ages	627	Rheumatoid arthritis	3	Rate	1990	0.222904	0.25164	0.192397
1	Deaths	115	Jamaica	3	Both	27	Age-standardized	627	Rheumatoid arthritis	3	Rate	1990	0.289157	0.32596	0.249053
1	Deaths	33	Armenia	3	Both	22	All ages	627	Rheumatoid arthritis	1	Number	1990	0.133674	0.154111	0.115535
1	Deaths	33	Armenia	3	Both	22	All ages	627	Rheumatoid arthritis	2	Percent	1990	5.65474e-06	6.51895e-06	4.88763e-06
1	Deaths	33	Armenia	3	Both	22	All ages	627	Rheumatoid arthritis	3	Rate	1990	0.0039079	0.00450535	0.00337759
1	Deaths	33	Armenia	3	Both	27	Age-standardized	627	Rheumatoid arthritis	3	Rate	1990	0.00589392	0.00683569	0.00503011
1	Deaths	374	Niue	3	Both	22	All ages	627	Rheumatoid arthritis	1	Number	1991	2.79589e-05	8.62573e-05	1.44513e-05
1	Deaths	374	Niue	3	Both	22	All ages	627	Rheumatoid arthritis	2	Percent	1991	1.08962e-06	3.47006e-06	5.94042e-07
1	Deaths	374	Niue	3	Both	22	All ages	627	Rheumatoid arthritis	3	Rate	1991	0.00122994	0.00379454	0.000635726
1	Deaths	374	Niue	3	Both	27	Age-standardized	627	Rheumatoid arthritis	3	Rate	1991	0.00124383	0.0038644	0.000644281
1	Deaths	18	Thailand	3	Both	22	All ages	627	Rheumatoid arthritis	1	Number	1992	98.0495	138.969	70.9365
1	Deaths	18	Thailand	3	Both	22	All ages	627	Rheumatoid arthritis	2	Percent	1992	0.000298411	0.000413573	0.000216499
1	Deaths	18	Thailand	3	Both	22	All ages	627	Rheumatoid arthritis	3	Rate	1992	0.168111	0.238271	0.121625
1	Deaths	18	Thailand	3	Both	27	Age-standardized	627	Rheumatoid arthritis	3	Rate	1992	0.289348	0.428169	0.208219
1	Deaths	146	Lebanon	3	Both	22	All ages	627	Rheumatoid arthritis	1	Number	1990	2.22963	3.31942	1.45514
1	Deaths	146	Lebanon	3	Both	22	All ages	627	Rheumatoid arthritis	2	Percent	1990	0.000104892	0.000148676	7.20864e-05
1	Deaths	146	Lebanon	3	Both	22	All ages	627	Rheumatoid arthritis	3	Rate	1990	0.0745204	0.110944	0.0486348
1	Deaths	146	Lebanon	3	Both	27	Age-standardized	627	Rheumatoid arthritis	3	Rate	1990	0.10672	0.156899	0.0693289
1	Deaths	173	Gabon	3	Both	22	All ages	627	Rheumatoid arthritis	1	Number	1991	0.38762	3.72074	0.129419
1	Deaths	173	Gabon	3	Both	22	All ages	627	Rheumatoid arthritis	2	Percent	1991	3.64878e-05	0.000361949	1.24703e-05
1	Deaths	173	Gabon	3	Both	22	All ages	627	Rheumatoid arthritis	3	Rate	1991	0.0384913	0.369475	0.0128515
1	Deaths	173	Gabon	3	Both	27	Age-standardized	627	Rheumatoid arthritis	3	Rate	1991	0.0744102	0.728831	0.0240192
1	Deaths	107	Barbados	3	Both	22	All ages	627	Rheumatoid arthritis	1	Number	1991	2.29059	2.64402	1.99392
1	Deaths	107	Barbados	3	Both	22	All ages	627	Rheumatoid arthritis	2	Percent	1991	0.000999602	0.00115383	0.000875152
1	Deaths	107	Barbados	3	Both	22	All ages	627	Rheumatoid arthritis	3	Rate	1991	0.903575	1.04299	0.786548
1	Deaths	107	Barbados	3	Both	27	Age-standardized	627	Rheumatoid arthritis	3	Rate	1991	0.760771	0.869466	0.664121
1	Deaths	164	Nepal	3	Both	22	All ages	627	Rheumatoid arthritis	1	Number	1990	57.401	90.747	34.4373
1	Deaths	164	Nepal	3	Both	22	All ages	627	Rheumatoid arthritis	2	Percent	1990	0.000260749	0.000413745	0.000155042
1	Deaths	164	Nepal	3	Both	22	All ages	627	Rheumatoid arthritis	3	Rate	1990	0.29483	0.466107	0.176882
1	Deaths	164	Nepal	3	Both	27	Age-standardized	627	Rheumatoid arthritis	3	Rate	1990	0.853921	1.36829	0.521173
1	Deaths	57	Belarus	3	Both	22	All ages	627	Rheumatoid arthritis	1	Number	1991	2.70966	2.99203	2.45857
1	Deaths	57	Belarus	3	Both	22	All ages	627	Rheumatoid arthritis	2	Percent	1991	2.37938e-05	2.62969e-05	2.16616e-05
1	Deaths	57	Belarus	3	Both	22	All ages	627	Rheumatoid arthritis	3	Rate	1991	0.0258746	0.028571	0.0234769
1	Deaths	57	Belarus	3	Both	27	Age-standardized	627	Rheumatoid arthritis	3	Rate	1991	0.0208552	0.0230827	0.0188695
1	Deaths	213	Niger	3	Both	22	All ages	627	Rheumatoid arthritis	1	Number	1990	0.178138	0.385827	0.0665201
1	Deaths	213	Niger	3	Both	22	All ages	627	Rheumatoid arthritis	2	Percent	1990	1.09778e-06	2.38186e-06	4.02105e-07
1	Deaths	213	Niger	3	Both	22	All ages	627	Rheumatoid arthritis	3	Rate	1990	0.00221779	0.00480349	0.000828165
1	Deaths	213	Niger	3	Both	27	Age-standardized	627	Rheumatoid arthritis	3	Rate	1990	0.0100709	0.0217565	0.00383672
1	Deaths	17	Sri Lanka	3	Both	22	All ages	627	Rheumatoid arthritis	1	Number	1990	3.54379	4.98991	2.83811
1	Deaths	17	Sri Lanka	3	Both	22	All ages	627	Rheumatoid arthritis	2	Percent	1990	3.37508e-05	4.61107e-05	2.7274e-05
1	Deaths	17	Sri Lanka	3	Both	22	All ages	627	Rheumatoid arthritis	3	Rate	1990	0.020687	0.0291288	0.0165676
1	Deaths	17	Sri Lanka	3	Both	27	Age-standardized	627	Rheumatoid arthritis	3	Rate	1990	0.0404904	0.0571397	0.0324004
1	Deaths	58	Estonia	3	Both	22	All ages	627	Rheumatoid arthritis	1	Number	1991	16.4571	18.6041	14.6761
1	Deaths	58	Estonia	3	Both	22	All ages	627	Rheumatoid arthritis	2	Percent	1991	0.0008253	0.000923248	0.000740572
1	Deaths	58	Estonia	3	Both	22	All ages	627	Rheumatoid arthritis	3	Rate	1991	1.05456	1.19214	0.940436
1	Deaths	58	Estonia	3	Both	27	Age-standardized	627	Rheumatoid arthritis	3	Rate	1991	0.809436	0.912284	0.726466
1	Deaths	66	Brunei Darussalam	3	Both	22	All ages	627	Rheumatoid arthritis	1	Number	1994	1.09701	1.47979	0.799782
1	Deaths	66	Brunei Darussalam	3	Both	22	All ages	627	Rheumatoid arthritis	2	Percent	1994	0.00103889	0.00137703	0.000754989
1	Deaths	66	Brunei Darussalam	3	Both	22	All ages	627	Rheumatoid arthritis	3	Rate	1994	0.379939	0.512512	0.276997
1	Deaths	66	Brunei Darussalam	3	Both	27	Age-standardized	627	Rheumatoid arthritis	3	Rate	1994	1.16524	1.555	0.8293
1	Deaths	197	Eswatini	3	Both	22	All ages	627	Rheumatoid arthritis	1	Number	1990	2.27759	3.32065	0.774456
1	Deaths	197	Eswatini	3	Both	22	All ages	627	Rheumatoid arthritis	2	Percent	1990	0.00034441	0.000490016	0.000116655
1	Deaths	197	Eswatini	3	Both	22	All ages	627	Rheumatoid arthritis	3	Rate	1990	0.282443	0.411791	0.0960398
1	Deaths	197	Eswatini	3	Both	27	Age-standardized	627	Rheumatoid arthritis	3	Rate	1990	0.893308	1.29418	0.299334
1	Deaths	148	Morocco	3	Both	22	All ages	627	Rheumatoid arthritis	1	Number	1992	13.3192	29.0436	5.9598
1	Deaths	148	Morocco	3	Both	22	All ages	627	Rheumatoid arthritis	2	Percent	1992	7.29567e-05	0.000154974	3.36773e-05
1	Deaths	148	Morocco	3	Both	22	All ages	627	Rheumatoid arthritis	3	Rate	1992	0.0506741	0.110499	0.0226746
1	Deaths	148	Morocco	3	Both	27	Age-standardized	627	Rheumatoid arthritis	3	Rate	1992	0.0845853	0.187517	0.0382756
1	Deaths	83	Iceland	3	Both	22	All ages	627	Rheumatoid arthritis	1	Number	1992	1.4198	1.55725	1.26066
1	Deaths	83	Iceland	3	Both	22	All ages	627	Rheumatoid arthritis	2	Percent	1992	0.000808817	0.000888228	0.00071745
1	Deaths	83	Iceland	3	Both	22	All ages	627	Rheumatoid arthritis	3	Rate	1992	0.547127	0.600096	0.485801
1	Deaths	83	Iceland	3	Both	27	Age-standardized	627	Rheumatoid arthritis	3	Rate	1992	0.454704	0.497253	0.404532
1	Deaths	189	United Republic of Tanzania	3	Both	22	All ages	627	Rheumatoid arthritis	1	Number	1991	3.67141	32.9737	1.19846
1	Deaths	189	United Republic of Tanzania	3	Both	22	All ages	627	Rheumatoid arthritis	2	Percent	1991	1.04929e-05	9.45723e-05	3.40138e-06
1	Deaths	189	United Republic of Tanzania	3	Both	22	All ages	627	Rheumatoid arthritis	3	Rate	1991	0.0137986	0.123928	0.00450429
1	Deaths	189	United Republic of Tanzania	3	Both	27	Age-standardized	627	Rheumatoid arthritis	3	Rate	1991	0.0381053	0.34276	0.0121215
1	Deaths	305	Bermuda	3	Both	22	All ages	627	Rheumatoid arthritis	1	Number	1990	0.24114	0.278872	0.208627
1	Deaths	305	Bermuda	3	Both	22	All ages	627	Rheumatoid arthritis	2	Percent	1990	0.000487254	0.000562469	0.000425849
1	Deaths	305	Bermuda	3	Both	22	All ages	627	Rheumatoid arthritis	3	Rate	1990	0.40608	0.46962	0.351327
1	Deaths	305	Bermuda	3	Both	27	Age-standardized	627	Rheumatoid arthritis	3	Rate	1990	0.469072	0.53881	0.404127
1	Deaths	114	Haiti	3	Both	22	All ages	627	Rheumatoid arthritis	1	Number	1990	19.0145	31.7323	11.1376
1	Deaths	114	Haiti	3	Both	22	All ages	627	Rheumatoid arthritis	2	Percent	1990	0.000217534	0.000359423	0.000133405
1	Deaths	114	Haiti	3	Both	22	All ages	627	Rheumatoid arthritis	3	Rate	1990	0.297994	0.497308	0.174549
1	Deaths	207	Ghana	3	Both	22	All ages	627	Rheumatoid arthritis	1	Number	1991	0.254608	0.534978	0.0373888
1	Deaths	207	Ghana	3	Both	22	All ages	627	Rheumatoid arthritis	2	Percent	1991	1.68172e-06	3.53881e-06	2.37342e-07
1	Deaths	207	Ghana	3	Both	22	All ages	627	Rheumatoid arthritis	3	Rate	1991	0.00166073	0.00348951	0.000243877
1	Deaths	207	Ghana	3	Both	27	Age-standardized	627	Rheumatoid arthritis	3	Rate	1991	0.00562472	0.0118991	0.000895303
1	Deaths	148	Morocco	3	Both	22	All ages	627	Rheumatoid arthritis	1	Number	1990	12.4161	26.8623	5.60066
1	Deaths	148	Morocco	3	Both	22	All ages	627	Rheumatoid arthritis	2	Percent	1990	6.78637e-05	0.00014272	3.16557e-05
1	Deaths	148	Morocco	3	Both	22	All ages	627	Rheumatoid arthritis	3	Rate	1990	0.0489653	0.105936	0.0220872
1	Deaths	148	Morocco	3	Both	27	Age-standardized	627	Rheumatoid arthritis	3	Rate	1990	0.0832776	0.183048	0.0375756
1	Deaths	26	Papua New Guinea	3	Both	22	All ages	627	Rheumatoid arthritis	1	Number	1991	0.0259023	0.0815661	0.0108077
1	Deaths	26	Papua New Guinea	3	Both	22	All ages	627	Rheumatoid arthritis	2	Percent	1991	7.40839e-07	2.3019e-06	3.31128e-07
1	Deaths	26	Papua New Guinea	3	Both	22	All ages	627	Rheumatoid arthritis	3	Rate	1991	0.000614312	0.00193446	0.00025632
1	Deaths	26	Papua New Guinea	3	Both	27	Age-standardized	627	Rheumatoid arthritis	3	Rate	1991	0.00128527	0.00463401	0.000513107
1	Deaths	18	Thailand	3	Both	22	All ages	627	Rheumatoid arthritis	1	Number	1990	90.5804	130.121	64.1527
1	Deaths	18	Thailand	3	Both	22	All ages	627	Rheumatoid arthritis	2	Percent	1990	0.000294699	0.000408818	0.000210305
1	Deaths	18	Thailand	3	Both	22	All ages	627	Rheumatoid arthritis	3	Rate	1990	0.159572	0.229229	0.113015
1	Deaths	18	Thailand	3	Both	27	Age-standardized	627	Rheumatoid arthritis	3	Rate	1990	0.288144	0.425687	0.20471
1	Deaths	75	Austria	3	Both	22	All ages	627	Rheumatoid arthritis	1	Number	1991	72.7214	81.1641	64.7483
1	Deaths	75	Austria	3	Both	22	All ages	627	Rheumatoid arthritis	2	Percent	1991	0.00087547	0.000975663	0.000778888
1	Deaths	75	Austria	3	Both	22	All ages	627	Rheumatoid arthritis	3	Rate	1991	0.932865	1.04117	0.830587
1	Deaths	75	Austria	3	Both	27	Age-standardized	627	Rheumatoid arthritis	3	Rate	1991	0.573913	0.632927	0.513421
1	Deaths	123	Peru	3	Both	22	All ages	627	Rheumatoid arthritis	1	Number	1991	79.1383	102.635	56.1647
1	Deaths	123	Peru	3	Both	22	All ages	627	Rheumatoid arthritis	2	Percent	1991	0.000566575	0.000733252	0.000405729
1	Deaths	123	Peru	3	Both	22	All ages	627	Rheumatoid arthritis	3	Rate	1991	0.358856	0.465403	0.254681
1	Deaths	123	Peru	3	Both	27	Age-standardized	627	Rheumatoid arthritis	3	Rate	1991	0.724937	0.949798	0.509316
1	Deaths	131	Nicaragua	3	Both	22	All ages	627	Rheumatoid arthritis	1	Number	1990	9.47656	12.1125	7.03027
1	Deaths	131	Nicaragua	3	Both	22	All ages	627	Rheumatoid arthritis	2	Percent	1990	0.000533468	0.000689122	0.000391938
1	Deaths	131	Nicaragua	3	Both	22	All ages	627	Rheumatoid arthritis	3	Rate	1990	0.243768	0.311573	0.180841
1	Deaths	131	Nicaragua	3	Both	27	Age-standardized	627	Rheumatoid arthritis	3	Rate	1990	0.689787	0.89291	0.499125
1	Deaths	98	Chile	3	Both	22	All ages	627	Rheumatoid arthritis	1	Number	1990	89.0915	96.9313	81.2295
1	Deaths	98	Chile	3	Both	22	All ages	627	Rheumatoid arthritis	2	Percent	1990	0.0011644	0.0012651	0.00106252
1	Deaths	98	Chile	3	Both	22	All ages	627	Rheumatoid arthritis	3	Rate	1990	0.670589	0.729599	0.611411
1	Deaths	98	Chile	3	Both	27	Age-standardized	627	Rheumatoid arthritis	3	Rate	1990	0.969109	1.0559	0.878095
1	Deaths	214	Nigeria	3	Both	22	All ages	627	Rheumatoid arthritis	1	Number	1990	2.71156	4.63176	1.4547
1	Deaths	214	Nigeria	3	Both	22	All ages	627	Rheumatoid arthritis	2	Percent	1990	2.05298e-06	3.40908e-06	1.11891e-06
1	Deaths	214	Nigeria	3	Both	22	All ages	627	Rheumatoid arthritis	3	Rate	1990	0.00301145	0.00514402	0.00161558
1	Deaths	214	Nigeria	3	Both	27	Age-standardized	627	Rheumatoid arthritis	3	Rate	1990	0.00748572	0.0126048	0.00407997
1	Deaths	35	Georgia	3	Both	22	All ages	627	Rheumatoid arthritis	1	Number	1992	2.05031	2.45694	1.67525
1	Deaths	35	Georgia	3	Both	22	All ages	627	Rheumatoid arthritis	2	Percent	1992	3.57673e-05	4.28927e-05	2.92887e-05
1	Deaths	35	Georgia	3	Both	22	All ages	627	Rheumatoid arthritis	3	Rate	1992	0.0376816	0.0451549	0.0307886
1	Deaths	35	Georgia	3	Both	27	Age-standardized	627	Rheumatoid arthritis	3	Rate	1992	0.0360588	0.0433663	0.0293072
1	Deaths	157	Yemen	3	Both	22	All ages	627	Rheumatoid arthritis	1	Number	1991	3.7071	6.29272	2.1667
1	Deaths	157	Yemen	3	Both	22	All ages	627	Rheumatoid arthritis	2	Percent	1991	2.5153e-05	4.06833e-05	1.52189e-05
1	Deaths	157	Yemen	3	Both	22	All ages	627	Rheumatoid arthritis	3	Rate	1991	0.0262688	0.0445907	0.0153534
1	Deaths	157	Yemen	3	Both	27	Age-standardized	627	Rheumatoid arthritis	3	Rate	1991	0.0756623	0.132611	0.0440404
1	Deaths	172	Equatorial Guinea	3	Both	22	All ages	627	Rheumatoid arthritis	1	Number	1991	0.133857	1.36242	0.0372798
1	Deaths	172	Equatorial Guinea	3	Both	22	All ages	627	Rheumatoid arthritis	2	Percent	1991	1.9373e-05	0.000201261	5.47531e-06
1	Deaths	172	Equatorial Guinea	3	Both	22	All ages	627	Rheumatoid arthritis	3	Rate	1991	0.0303811	0.309225	0.00846128
1	Deaths	172	Equatorial Guinea	3	Both	27	Age-standardized	627	Rheumatoid arthritis	3	Rate	1991	0.0794927	0.803441	0.0214288
1	Deaths	33	Armenia	3	Both	22	All ages	627	Rheumatoid arthritis	1	Number	1994	0.794896	0.893204	0.697052
1	Deaths	33	Armenia	3	Both	22	All ages	627	Rheumatoid arthritis	2	Percent	1994	2.98959e-05	3.37645e-05	2.60608e-05
1	Deaths	33	Armenia	3	Both	22	All ages	627	Rheumatoid arthritis	3	Rate	1994	0.0232897	0.02617	0.020423
1	Deaths	33	Armenia	3	Both	27	Age-standardized	627	Rheumatoid arthritis	3	Rate	1994	0.0360349	0.0407659	0.0312838
1	Deaths	133	Venezuela (Bolivarian Republic of)	3	Both	22	All ages	627	Rheumatoid arthritis	1	Number	1992	97.9743	106.227	89.9646
1	Deaths	133	Venezuela (Bolivarian Republic of)	3	Both	22	All ages	627	Rheumatoid arthritis	2	Percent	1992	0.0010708	0.00116061	0.000983274
1	Deaths	133	Venezuela (Bolivarian Republic of)	3	Both	22	All ages	627	Rheumatoid arthritis	3	Rate	1992	0.496685	0.538524	0.456079
1	Deaths	133	Venezuela (Bolivarian Republic of)	3	Both	27	Age-standardized	627	Rheumatoid arthritis	3	Rate	1992	1.01831	1.10928	0.926693
1	Deaths	59	Latvia	3	Both	22	All ages	627	Rheumatoid arthritis	1	Number	1991	20.9181	23.1424	18.2367
1	Deaths	59	Latvia	3	Both	22	All ages	627	Rheumatoid arthritis	2	Percent	1991	0.000607625	0.000674447	0.000529529
1	Deaths	59	Latvia	3	Both	22	All ages	627	Rheumatoid arthritis	3	Rate	1991	0.789533	0.873488	0.688325
1	Deaths	59	Latvia	3	Both	27	Age-standardized	627	Rheumatoid arthritis	3	Rate	1991	0.588316	0.651603	0.512647
1	Deaths	68	Republic of Korea	3	Both	22	All ages	627	Rheumatoid arthritis	1	Number	1990	177.935	230.343	139.084
1	Deaths	68	Republic of Korea	3	Both	22	All ages	627	Rheumatoid arthritis	2	Percent	1990	0.000744306	0.000964031	0.000583197
1	Deaths	68	Republic of Korea	3	Both	22	All ages	627	Rheumatoid arthritis	3	Rate	1990	0.402156	0.520605	0.314348
1	Deaths	68	Republic of Korea	3	Both	27	Age-standardized	627	Rheumatoid arthritis	3	Rate	1990	0.829123	1.05536	0.620905
1	Deaths	11	Indonesia	3	Both	22	All ages	627	Rheumatoid arthritis	1	Number	1991	88.2846	127.509	40.3135
1	Deaths	11	Indonesia	3	Both	22	All ages	627	Rheumatoid arthritis	2	Percent	1991	6.48421e-05	9.30776e-05	2.91845e-05
1	Deaths	11	Indonesia	3	Both	22	All ages	627	Rheumatoid arthritis	3	Rate	1991	0.0470224	0.067914	0.0214719
1	Deaths	11	Indonesia	3	Both	27	Age-standardized	627	Rheumatoid arthritis	3	Rate	1991	0.114797	0.163026	0.0480307
1	Deaths	156	United Arab Emirates	3	Both	22	All ages	627	Rheumatoid arthritis	1	Number	1991	0.985369	1.43213	0.646652
1	Deaths	156	United Arab Emirates	3	Both	22	All ages	627	Rheumatoid arthritis	2	Percent	1991	0.000175089	0.00024126	0.000114326
1	Deaths	156	United Arab Emirates	3	Both	22	All ages	627	Rheumatoid arthritis	3	Rate	1991	0.0497582	0.0723184	0.032654
1	Deaths	156	United Arab Emirates	3	Both	27	Age-standardized	627	Rheumatoid arthritis	3	Rate	1991	0.177071	0.260976	0.117976
1	Deaths	198	Zimbabwe	3	Both	22	All ages	627	Rheumatoid arthritis	1	Number	1990	16.4176	21.9178	8.45202
1	Deaths	198	Zimbabwe	3	Both	22	All ages	627	Rheumatoid arthritis	2	Percent	1990	0.000201295	0.000262948	0.000105038
1	Deaths	198	Zimbabwe	3	Both	22	All ages	627	Rheumatoid arthritis	3	Rate	1990	0.158735	0.211914	0.0817193
1	Deaths	198	Zimbabwe	3	Both	27	Age-standardized	627	Rheumatoid arthritis	3	Rate	1990	0.464879	0.613965	0.232639
1	Deaths	422	United States Virgin Islands	3	Both	22	All ages	627	Rheumatoid arthritis	1	Number	1990	0.163459	0.217396	0.115822
1	Deaths	422	United States Virgin Islands	3	Both	22	All ages	627	Rheumatoid arthritis	2	Percent	1990	0.000254203	0.000325216	0.000186069
1	Deaths	422	United States Virgin Islands	3	Both	22	All ages	627	Rheumatoid arthritis	3	Rate	1990	0.154118	0.204972	0.109203
1	Deaths	422	United States Virgin Islands	3	Both	27	Age-standardized	627	Rheumatoid arthritis	3	Rate	1990	0.292799	0.389002	0.208925
1	Deaths	198	Zimbabwe	3	Both	22	All ages	627	Rheumatoid arthritis	1	Number	1992	16.7862	22.5484	8.68018
1	Deaths	198	Zimbabwe	3	Both	22	All ages	627	Rheumatoid arthritis	2	Percent	1992	0.000170764	0.000230191	9.28279e-05
1	Deaths	198	Zimbabwe	3	Both	22	All ages	627	Rheumatoid arthritis	3	Rate	1992	0.15489	0.208059	0.0800939
1	Deaths	198	Zimbabwe	3	Both	27	Age-standardized	627	Rheumatoid arthritis	3	Rate	1992	0.444666	0.596039	0.227698
1	Deaths	191	Zambia	3	Both	22	All ages	627	Rheumatoid arthritis	1	Number	1991	1.07077	9.93023	0.344092
1	Deaths	191	Zambia	3	Both	22	All ages	627	Rheumatoid arthritis	2	Percent	1991	8.77141e-06	8.28198e-05	2.77315e-06
1	Deaths	191	Zambia	3	Both	22	All ages	627	Rheumatoid arthritis	3	Rate	1991	0.0131795	0.122226	0.00423524
1	Deaths	191	Zambia	3	Both	27	Age-standardized	627	Rheumatoid arthritis	3	Rate	1991	0.0418375	0.36714	0.0136913
1	Deaths	179	Ethiopia	3	Both	22	All ages	627	Rheumatoid arthritis	1	Number	1990	8.4919	67.1548	2.82115
1	Deaths	179	Ethiopia	3	Both	22	All ages	627	Rheumatoid arthritis	2	Percent	1990	9.22299e-06	7.42862e-05	3.14774e-06
1	Deaths	179	Ethiopia	3	Both	22	All ages	627	Rheumatoid arthritis	3	Rate	1990	0.0167928	0.132799	0.00557885
1	Deaths	179	Ethiopia	3	Both	27	Age-standardized	627	Rheumatoid arthritis	3	Rate	1990	0.0515128	0.415184	0.0162382
1	Deaths	101	Canada	3	Both	22	All ages	627	Rheumatoid arthritis	1	Number	1992	231.039	252.812	207.131
1	Deaths	101	Canada	3	Both	22	All ages	627	Rheumatoid arthritis	2	Percent	1992	0.00117206	0.00128217	0.00105282
1	Deaths	101	Canada	3	Both	22	All ages	627	Rheumatoid arthritis	3	Rate	1992	0.824125	0.90179	0.738844
1	Deaths	101	Canada	3	Both	27	Age-standardized	627	Rheumatoid arthritis	3	Rate	1992	0.658246	0.719599	0.59031
1	Deaths	200	Benin	3	Both	22	All ages	627	Rheumatoid arthritis	1	Number	1990	0.147977	0.280175	0.0643428
1	Deaths	200	Benin	3	Both	22	All ages	627	Rheumatoid arthritis	2	Percent	1990	2.21597e-06	4.19127e-06	9.74808e-07
1	Deaths	200	Benin	3	Both	22	All ages	627	Rheumatoid arthritis	3	Rate	1990	0.00305068	0.00577604	0.00132648
1	Deaths	200	Benin	3	Both	27	Age-standardized	627	Rheumatoid arthritis	3	Rate	1990	0.00808507	0.0149703	0.00366963
1	Deaths	133	Venezuela (Bolivarian Republic of)	3	Both	22	All ages	627	Rheumatoid arthritis	1	Number	1990	89.9731	97.7567	82.3011
1	Deaths	133	Venezuela (Bolivarian Republic of)	3	Both	22	All ages	627	Rheumatoid arthritis	2	Percent	1990	0.00101038	0.00110066	0.00092389
1	Deaths	133	Venezuela (Bolivarian Republic of)	3	Both	22	All ages	627	Rheumatoid arthritis	3	Rate	1990	0.478396	0.519782	0.437603
1	Deaths	133	Venezuela (Bolivarian Republic of)	3	Both	27	Age-standardized	627	Rheumatoid arthritis	3	Rate	1990	1.0322	1.12895	0.937199
1	Deaths	126	Costa Rica	3	Both	22	All ages	627	Rheumatoid arthritis	1	Number	1991	13.3812	14.7082	12.073
1	Deaths	126	Costa Rica	3	Both	22	All ages	627	Rheumatoid arthritis	2	Percent	1991	0.00113805	0.00124675	0.00102877
1	Deaths	126	Costa Rica	3	Both	22	All ages	627	Rheumatoid arthritis	3	Rate	1991	0.426989	0.469331	0.385245
1	Deaths	126	Costa Rica	3	Both	27	Age-standardized	627	Rheumatoid arthritis	3	Rate	1991	0.778145	0.858595	0.701612
1	Deaths	99	Uruguay	3	Both	22	All ages	627	Rheumatoid arthritis	1	Number	1994	25.462	27.7794	22.9901
1	Deaths	99	Uruguay	3	Both	22	All ages	627	Rheumatoid arthritis	2	Percent	1994	0.00083073	0.000908253	0.000750753
1	Deaths	99	Uruguay	3	Both	22	All ages	627	Rheumatoid arthritis	3	Rate	1994	0.792005	0.864088	0.715116
1	Deaths	99	Uruguay	3	Both	27	Age-standardized	627	Rheumatoid arthritis	3	Rate	1994	0.62577	0.682112	0.565291
1	Deaths	66	Brunei Darussalam	3	Both	22	All ages	627	Rheumatoid arthritis	1	Number	1990	1.06634	1.4277	0.774068
1	Deaths	66	Brunei Darussalam	3	Both	22	All ages	627	Rheumatoid arthritis	2	Percent	1990	0.00101647	0.00135009	0.000740497
1	Deaths	66	Brunei Darussalam	3	Both	22	All ages	627	Rheumatoid arthritis	3	Rate	1990	0.411307	0.550687	0.298571
1	Deaths	66	Brunei Darussalam	3	Both	27	Age-standardized	627	Rheumatoid arthritis	3	Rate	1990	1.23068	1.64175	0.885478
1	Deaths	132	Panama	3	Both	22	All ages	627	Rheumatoid arthritis	1	Number	1992	6.80445	7.56874	5.9978
1	Deaths	132	Panama	3	Both	22	All ages	627	Rheumatoid arthritis	2	Percent	1992	0.000659714	0.000733613	0.000587302
1	Deaths	132	Panama	3	Both	22	All ages	627	Rheumatoid arthritis	3	Rate	1992	0.273074	0.303746	0.240701
1	Deaths	132	Panama	3	Both	27	Age-standardized	627	Rheumatoid arthritis	3	Rate	1992	0.449706	0.500731	0.392829
1	Deaths	149	Palestine	3	Both	22	All ages	627	Rheumatoid arthritis	1	Number	1992	0.876304	1.21535	0.5693
1	Deaths	149	Palestine	3	Both	22	All ages	627	Rheumatoid arthritis	2	Percent	1992	7.27707e-05	9.42464e-05	4.95536e-05
1	Deaths	149	Palestine	3	Both	22	All ages	627	Rheumatoid arthritis	3	Rate	1992	0.0396412	0.0549784	0.0257533
1	Deaths	149	Palestine	3	Both	27	Age-standardized	627	Rheumatoid arthritis	3	Rate	1992	0.099068	0.134167	0.064664
1	Deaths	376	Northern Mariana Islands	3	Both	22	All ages	627	Rheumatoid arthritis	1	Number	1991	0.00228887	0.00427893	0.00140597
1	Deaths	376	Northern Mariana Islands	3	Both	22	All ages	627	Rheumatoid arthritis	2	Percent	1991	1.33785e-05	2.49382e-05	8.80583e-06
1	Deaths	376	Northern Mariana Islands	3	Both	22	All ages	627	Rheumatoid arthritis	3	Rate	1991	0.00484747	0.0090621	0.00297763
1	Deaths	376	Northern Mariana Islands	3	Both	27	Age-standardized	627	Rheumatoid arthritis	3	Rate	1991	0.00978185	0.0188273	0.0061478
1	Deaths	131	Nicaragua	3	Both	22	All ages	627	Rheumatoid arthritis	1	Number	1994	11.3186	14.308	8.44883
1	Deaths	131	Nicaragua	3	Both	22	All ages	627	Rheumatoid arthritis	2	Percent	1994	0.000631451	0.000804342	0.000473541
1	Deaths	131	Nicaragua	3	Both	22	All ages	627	Rheumatoid arthritis	3	Rate	1994	0.260115	0.328818	0.194165
1	Deaths	131	Nicaragua	3	Both	27	Age-standardized	627	Rheumatoid arthritis	3	Rate	1994	0.673895	0.866448	0.493779
1	Deaths	67	Japan	3	Both	22	All ages	627	Rheumatoid arthritis	1	Number	1992	1481.72	1551.73	1353.65
1	Deaths	67	Japan	3	Both	22	All ages	627	Rheumatoid arthritis	2	Percent	1992	0.00173735	0.00181807	0.00158586
1	Deaths	67	Japan	3	Both	22	All ages	627	Rheumatoid arthritis	3	Rate	1992	1.17046	1.22577	1.06929
1	Deaths	67	Japan	3	Both	27	Age-standardized	627	Rheumatoid arthritis	3	Rate	1992	0.82518	0.865972	0.750029
1	Deaths	181	Madagascar	3	Both	22	All ages	627	Rheumatoid arthritis	1	Number	1992	1.45382	12.6792	0.450988
1	Deaths	181	Madagascar	3	Both	22	All ages	627	Rheumatoid arthritis	2	Percent	1992	9.76809e-06	8.48593e-05	2.99486e-06
1	Deaths	181	Madagascar	3	Both	22	All ages	627	Rheumatoid arthritis	3	Rate	1992	0.0115735	0.100935	0.00359018
1	Deaths	181	Madagascar	3	Both	27	Age-standardized	627	Rheumatoid arthritis	3	Rate	1992	0.0324062	0.279464	0.00976965
1	Deaths	165	Pakistan	3	Both	22	All ages	627	Rheumatoid arthritis	1	Number	1992	523.073	747.867	316.957
1	Deaths	165	Pakistan	3	Both	22	All ages	627	Rheumatoid arthritis	2	Percent	1992	0.000488821	0.00070287	0.000299861
1	Deaths	165	Pakistan	3	Both	22	All ages	627	Rheumatoid arthritis	3	Rate	1992	0.450789	0.644518	0.273157
1	Deaths	165	Pakistan	3	Both	27	Age-standardized	627	Rheumatoid arthritis	3	Rate	1992	1.05801	1.57038	0.651131
1	Deaths	320	Cook Islands	3	Both	22	All ages	627	Rheumatoid arthritis	1	Number	1990	4.20581e-06	1.37378e-05	1.73308e-06
1	Deaths	320	Cook Islands	3	Both	22	All ages	627	Rheumatoid arthritis	2	Percent	1990	3.20495e-08	1.04261e-07	1.33798e-08
1	Deaths	320	Cook Islands	3	Both	22	All ages	627	Rheumatoid arthritis	3	Rate	1990	2.22259e-05	7.25983e-05	9.15857e-06
1	Deaths	320	Cook Islands	3	Both	27	Age-standardized	627	Rheumatoid arthritis	3	Rate	1990	2.89958e-05	9.12828e-05	1.23083e-05
1	Deaths	349	Greenland	3	Both	22	All ages	627	Rheumatoid arthritis	1	Number	1992	0.130205	0.190072	0.0968118
1	Deaths	349	Greenland	3	Both	22	All ages	627	Rheumatoid arthritis	2	Percent	1992	0.000287975	0.000424641	0.000212971
1	Deaths	349	Greenland	3	Both	22	All ages	627	Rheumatoid arthritis	3	Rate	1992	0.235081	0.343167	0.17479
1	Deaths	349	Greenland	3	Both	27	Age-standardized	627	Rheumatoid arthritis	3	Rate	1992	0.438629	0.615358	0.327876
1	Deaths	164	Nepal	3	Both	22	All ages	627	Rheumatoid arthritis	1	Number	1994	61.9865	95.228	36.9441
1	Deaths	164	Nepal	3	Both	22	All ages	627	Rheumatoid arthritis	2	Percent	1994	0.000303884	0.000468918	0.000187199
1	Deaths	164	Nepal	3	Both	22	All ages	627	Rheumatoid arthritis	3	Rate	1994	0.292824	0.449856	0.174524
1	Deaths	164	Nepal	3	Both	27	Age-standardized	627	Rheumatoid arthritis	3	Rate	1994	0.817853	1.35086	0.504737
1	Deaths	50	Montenegro	3	Both	22	All ages	627	Rheumatoid arthritis	1	Number	1990	1.01252	1.31923	0.745835
1	Deaths	50	Montenegro	3	Both	22	All ages	627	Rheumatoid arthritis	2	Percent	1990	0.000238364	0.000311356	0.000179997
1	Deaths	50	Montenegro	3	Both	22	All ages	627	Rheumatoid arthritis	3	Rate	1990	0.161695	0.210675	0.119106
1	Deaths	50	Montenegro	3	Both	27	Age-standardized	627	Rheumatoid arthritis	3	Rate	1990	0.167036	0.219902	0.123687
1	Deaths	116	Saint Lucia	3	Both	22	All ages	627	Rheumatoid arthritis	1	Number	1992	0.535208	0.591367	0.481888
1	Deaths	116	Saint Lucia	3	Both	22	All ages	627	Rheumatoid arthritis	2	Percent	1992	0.000570634	0.000631312	0.000513741
1	Deaths	116	Saint Lucia	3	Both	22	All ages	627	Rheumatoid arthritis	3	Rate	1992	0.381625	0.421668	0.343606
1	Deaths	116	Saint Lucia	3	Both	27	Age-standardized	627	Rheumatoid arthritis	3	Rate	1992	0.826422	0.919349	0.73462
1	Deaths	83	Iceland	3	Both	22	All ages	627	Rheumatoid arthritis	1	Number	1994	1.26129	1.40271	1.1037
1	Deaths	83	Iceland	3	Both	22	All ages	627	Rheumatoid arthritis	2	Percent	1994	0.000708542	0.000787609	0.000629013
1	Deaths	83	Iceland	3	Both	22	All ages	627	Rheumatoid arthritis	3	Rate	1994	0.476721	0.530175	0.417158
1	Deaths	83	Iceland	3	Both	27	Age-standardized	627	Rheumatoid arthritis	3	Rate	1994	0.388921	0.431877	0.341723
1	Deaths	132	Panama	3	Both	22	All ages	627	Rheumatoid arthritis	1	Number	1990	6.18857	6.84156	5.4551
1	Deaths	132	Panama	3	Both	22	All ages	627	Rheumatoid arthritis	2	Percent	1990	0.000630724	0.000703114	0.000559972
1	Deaths	132	Panama	3	Both	22	All ages	627	Rheumatoid arthritis	3	Rate	1990	0.259049	0.286383	0.228347
1	Deaths	132	Panama	3	Both	27	Age-standardized	627	Rheumatoid arthritis	3	Rate	1990	0.445001	0.492908	0.390172
1	Deaths	116	Saint Lucia	3	Both	22	All ages	627	Rheumatoid arthritis	1	Number	1994	0.547795	0.600628	0.497557
1	Deaths	116	Saint Lucia	3	Both	22	All ages	627	Rheumatoid arthritis	2	Percent	1994	0.000586798	0.000643396	0.000533643
1	Deaths	116	Saint Lucia	3	Both	22	All ages	627	Rheumatoid arthritis	3	Rate	1994	0.380286	0.416963	0.34541
1	Deaths	116	Saint Lucia	3	Both	27	Age-standardized	627	Rheumatoid arthritis	3	Rate	1994	0.835862	0.92309	0.750479
1	Deaths	116	Saint Lucia	3	Both	22	All ages	627	Rheumatoid arthritis	1	Number	1990	0.508468	0.559861	0.453808
1	Deaths	116	Saint Lucia	3	Both	22	All ages	627	Rheumatoid arthritis	2	Percent	1990	0.00055468	0.000608494	0.000499665
1	Deaths	116	Saint Lucia	3	Both	22	All ages	627	Rheumatoid arthritis	3	Rate	1990	0.372314	0.409946	0.332291
1	Deaths	116	Saint Lucia	3	Both	27	Age-standardized	627	Rheumatoid arthritis	3	Rate	1990	0.798617	0.882766	0.709491
1	Deaths	125	Colombia	3	Both	22	All ages	627	Rheumatoid arthritis	1	Number	1991	129.872	139.097	120.785
1	Deaths	125	Colombia	3	Both	22	All ages	627	Rheumatoid arthritis	2	Percent	1991	0.000721914	0.000775927	0.000672222
1	Deaths	125	Colombia	3	Both	22	All ages	627	Rheumatoid arthritis	3	Rate	1991	0.390957	0.418726	0.3636
1	Deaths	125	Colombia	3	Both	27	Age-standardized	627	Rheumatoid arthritis	3	Rate	1991	0.792082	0.851184	0.73447
1	Deaths	206	Gambia	3	Both	22	All ages	627	Rheumatoid arthritis	1	Number	1991	0.0220644	0.0429968	0.00894765
1	Deaths	206	Gambia	3	Both	22	All ages	627	Rheumatoid arthritis	2	Percent	1991	2.14108e-06	4.01255e-06	8.43283e-07
1	Deaths	206	Gambia	3	Both	22	All ages	627	Rheumatoid arthritis	3	Rate	1991	0.00215941	0.00420804	0.000875695
1	Deaths	206	Gambia	3	Both	27	Age-standardized	627	Rheumatoid arthritis	3	Rate	1991	0.00787554	0.0149444	0.00328543
1	Deaths	130	Mexico	3	Both	22	All ages	627	Rheumatoid arthritis	1	Number	1990	774.659	801.357	740.271
1	Deaths	130	Mexico	3	Both	22	All ages	627	Rheumatoid arthritis	2	Percent	1990	0.00172631	0.00180061	0.0016393
1	Deaths	130	Mexico	3	Both	22	All ages	627	Rheumatoid arthritis	3	Rate	1990	0.907191	0.938455	0.866919
1	Deaths	130	Mexico	3	Both	27	Age-standardized	627	Rheumatoid arthritis	3	Rate	1990	2.24687	2.33214	2.12995
1	Deaths	18	Thailand	3	Both	22	All ages	627	Rheumatoid arthritis	1	Number	1994	104.82	152.472	74.4748
1	Deaths	18	Thailand	3	Both	22	All ages	627	Rheumatoid arthritis	2	Percent	1994	0.000292174	0.000424786	0.000216436
1	Deaths	18	Thailand	3	Both	22	All ages	627	Rheumatoid arthritis	3	Rate	1994	0.175577	0.255396	0.124748
1	Deaths	18	Thailand	3	Both	27	Age-standardized	627	Rheumatoid arthritis	3	Rate	1994	0.28679	0.433033	0.206614
1	Deaths	68	Republic of Korea	3	Both	22	All ages	627	Rheumatoid arthritis	1	Number	1992	178.533	221.984	139.939
1	Deaths	68	Republic of Korea	3	Both	22	All ages	627	Rheumatoid arthritis	2	Percent	1992	0.000755851	0.000938417	0.00059243
1	Deaths	68	Republic of Korea	3	Both	22	All ages	627	Rheumatoid arthritis	3	Rate	1992	0.397903	0.494745	0.311886
1	Deaths	68	Republic of Korea	3	Both	27	Age-standardized	627	Rheumatoid arthritis	3	Rate	1992	0.766267	0.955678	0.576027
1	Deaths	77	Cyprus	3	Both	22	All ages	627	Rheumatoid arthritis	1	Number	1991	12.8059	17.4319	9.44075
1	Deaths	77	Cyprus	3	Both	22	All ages	627	Rheumatoid arthritis	2	Percent	1991	0.00193189	0.00262356	0.00142096
1	Deaths	77	Cyprus	3	Both	22	All ages	627	Rheumatoid arthritis	3	Rate	1991	1.61633	2.20023	1.19159
1	Deaths	77	Cyprus	3	Both	27	Age-standardized	627	Rheumatoid arthritis	3	Rate	1991	2.05439	2.80906	1.43879
1	Deaths	209	Guinea-Bissau	3	Both	22	All ages	627	Rheumatoid arthritis	1	Number	1991	0.0333859	0.0691769	0.0138973
1	Deaths	209	Guinea-Bissau	3	Both	22	All ages	627	Rheumatoid arthritis	2	Percent	1991	1.99757e-06	4.01827e-06	8.60391e-07
1	Deaths	209	Guinea-Bissau	3	Both	22	All ages	627	Rheumatoid arthritis	3	Rate	1991	0.00324367	0.00672101	0.00135022
1	Deaths	209	Guinea-Bissau	3	Both	27	Age-standardized	627	Rheumatoid arthritis	3	Rate	1991	0.0114464	0.0233666	0.00510261
1	Deaths	68	Republic of Korea	3	Both	22	All ages	627	Rheumatoid arthritis	1	Number	1994	182.901	220.53	146.025
1	Deaths	68	Republic of Korea	3	Both	22	All ages	627	Rheumatoid arthritis	2	Percent	1994	0.000766716	0.000924397	0.000611143
1	Deaths	68	Republic of Korea	3	Both	22	All ages	627	Rheumatoid arthritis	3	Rate	1994	0.403813	0.486891	0.322397
1	Deaths	68	Republic of Korea	3	Both	27	Age-standardized	627	Rheumatoid arthritis	3	Rate	1994	0.702355	0.847128	0.541473
1	Deaths	44	Bosnia and Herzegovina	3	Both	22	All ages	627	Rheumatoid arthritis	1	Number	1991	13.193	17.7651	9.4637
1	Deaths	44	Bosnia and Herzegovina	3	Both	22	All ages	627	Rheumatoid arthritis	2	Percent	1991	0.000426634	0.000575442	0.000307795
1	Deaths	44	Bosnia and Herzegovina	3	Both	22	All ages	627	Rheumatoid arthritis	3	Rate	1991	0.292845	0.394332	0.210066
1	Deaths	44	Bosnia and Herzegovina	3	Both	27	Age-standardized	627	Rheumatoid arthritis	3	Rate	1991	0.347263	0.460269	0.249277
1	Deaths	101	Canada	3	Both	22	All ages	627	Rheumatoid arthritis	1	Number	1990	208.638	229.166	186.37
1	Deaths	101	Canada	3	Both	22	All ages	627	Rheumatoid arthritis	2	Percent	1990	0.0010899	0.00119764	0.000973425
1	Deaths	101	Canada	3	Both	22	All ages	627	Rheumatoid arthritis	3	Rate	1990	0.765562	0.840889	0.683855
1	Deaths	101	Canada	3	Both	27	Age-standardized	627	Rheumatoid arthritis	3	Rate	1990	0.630576	0.692154	0.562394
1	Deaths	92	Spain	3	Both	22	All ages	627	Rheumatoid arthritis	1	Number	1991	243.83	273.124	217.261
1	Deaths	92	Spain	3	Both	22	All ages	627	Rheumatoid arthritis	2	Percent	1991	0.000730027	0.000817442	0.000651978
1	Deaths	92	Spain	3	Both	22	All ages	627	Rheumatoid arthritis	3	Rate	1991	0.627308	0.702673	0.558953
1	Deaths	92	Spain	3	Both	27	Age-standardized	627	Rheumatoid arthritis	3	Rate	1991	0.424594	0.473734	0.379386
1	Deaths	165	Pakistan	3	Both	22	All ages	627	Rheumatoid arthritis	1	Number	1994	580.385	817.52	360.709
1	Deaths	165	Pakistan	3	Both	22	All ages	627	Rheumatoid arthritis	2	Percent	1994	0.000514712	0.000714148	0.00031766
1	Deaths	165	Pakistan	3	Both	22	All ages	627	Rheumatoid arthritis	3	Rate	1994	0.478955	0.674648	0.29767
1	Deaths	165	Pakistan	3	Both	27	Age-standardized	627	Rheumatoid arthritis	3	Rate	1994	1.12779	1.6315	0.707856
1	Deaths	86	Italy	3	Both	22	All ages	627	Rheumatoid arthritis	1	Number	1992	420.867	446.381	379.084
1	Deaths	86	Italy	3	Both	22	All ages	627	Rheumatoid arthritis	2	Percent	1992	0.000770953	0.000817336	0.00069442
1	Deaths	86	Italy	3	Both	22	All ages	627	Rheumatoid arthritis	3	Rate	1992	0.742161	0.787151	0.66848
1	Deaths	86	Italy	3	Both	27	Age-standardized	627	Rheumatoid arthritis	3	Rate	1992	0.438707	0.464709	0.396673
1	Deaths	180	Kenya	3	Both	22	All ages	627	Rheumatoid arthritis	1	Number	1990	2.15555	18.6192	0.765784
1	Deaths	180	Kenya	3	Both	22	All ages	627	Rheumatoid arthritis	2	Percent	1990	1.12567e-05	9.87904e-05	3.91223e-06
1	Deaths	180	Kenya	3	Both	22	All ages	627	Rheumatoid arthritis	3	Rate	1990	0.00931236	0.0804381	0.00330832
1	Deaths	180	Kenya	3	Both	27	Age-standardized	627	Rheumatoid arthritis	3	Rate	1990	0.0301342	0.253215	0.0106152
1	Deaths	34	Azerbaijan	3	Both	22	All ages	627	Rheumatoid arthritis	1	Number	1990	0.14131	0.228161	0.0989802
1	Deaths	34	Azerbaijan	3	Both	22	All ages	627	Rheumatoid arthritis	2	Percent	1990	2.52557e-06	4.04982e-06	1.75587e-06
1	Deaths	34	Azerbaijan	3	Both	22	All ages	627	Rheumatoid arthritis	3	Rate	1990	0.00192877	0.00311422	0.001351
1	Deaths	34	Azerbaijan	3	Both	27	Age-standardized	627	Rheumatoid arthritis	3	Rate	1990	0.00340255	0.00535643	0.00225573
1	Deaths	132	Panama	3	Both	22	All ages	627	Rheumatoid arthritis	1	Number	1994	7.30194	8.17602	6.47127
1	Deaths	132	Panama	3	Both	22	All ages	627	Rheumatoid arthritis	2	Percent	1994	0.000661374	0.00074065	0.000584721
1	Deaths	132	Panama	3	Both	22	All ages	627	Rheumatoid arthritis	3	Rate	1994	0.281716	0.315438	0.249667
1	Deaths	132	Panama	3	Both	27	Age-standardized	627	Rheumatoid arthritis	3	Rate	1994	0.448478	0.502317	0.396238
1	Deaths	86	Italy	3	Both	22	All ages	627	Rheumatoid arthritis	1	Number	1990	385.879	410.071	349.899
1	Deaths	86	Italy	3	Both	22	All ages	627	Rheumatoid arthritis	2	Percent	1990	0.000715272	0.000759963	0.000649124
1	Deaths	86	Italy	3	Both	22	All ages	627	Rheumatoid arthritis	3	Rate	1990	0.679382	0.721975	0.616035
1	Deaths	86	Italy	3	Both	27	Age-standardized	627	Rheumatoid arthritis	3	Rate	1990	0.416599	0.441925	0.37873
1	Deaths	51	Poland	3	Both	22	All ages	627	Rheumatoid arthritis	1	Number	1992	485.756	503.105	462.011
1	Deaths	51	Poland	3	Both	22	All ages	627	Rheumatoid arthritis	2	Percent	1992	0.00122921	0.00127245	0.00116928
1	Deaths	51	Poland	3	Both	22	All ages	627	Rheumatoid arthritis	3	Rate	1992	1.26703	1.31228	1.20509
1	Deaths	51	Poland	3	Both	27	Age-standardized	627	Rheumatoid arthritis	3	Rate	1992	1.07907	1.11821	1.02557
1	Deaths	34	Azerbaijan	3	Both	22	All ages	627	Rheumatoid arthritis	1	Number	1994	0.305307	0.417187	0.194844
1	Deaths	34	Azerbaijan	3	Both	22	All ages	627	Rheumatoid arthritis	2	Percent	1994	4.54738e-06	6.13202e-06	2.91372e-06
1	Deaths	34	Azerbaijan	3	Both	22	All ages	627	Rheumatoid arthritis	3	Rate	1994	0.00393777	0.00538078	0.00251305
1	Deaths	34	Azerbaijan	3	Both	27	Age-standardized	627	Rheumatoid arthritis	3	Rate	1994	0.00644349	0.00916895	0.00395747
1	Deaths	99	Uruguay	3	Both	22	All ages	627	Rheumatoid arthritis	1	Number	1990	23.7945	26.1525	21.5907
1	Deaths	99	Uruguay	3	Both	22	All ages	627	Rheumatoid arthritis	2	Percent	1990	0.000795429	0.000874476	0.000722624
1	Deaths	99	Uruguay	3	Both	22	All ages	627	Rheumatoid arthritis	3	Rate	1990	0.757927	0.833035	0.687729
1	Deaths	99	Uruguay	3	Both	27	Age-standardized	627	Rheumatoid arthritis	3	Rate	1990	0.633595	0.695115	0.575552
1	Deaths	119	Trinidad and Tobago	3	Both	22	All ages	627	Rheumatoid arthritis	1	Number	1992	7.79421	8.65332	7.00069
1	Deaths	119	Trinidad and Tobago	3	Both	22	All ages	627	Rheumatoid arthritis	2	Percent	1992	0.000893782	0.000982163	0.000797966
1	Deaths	119	Trinidad and Tobago	3	Both	22	All ages	627	Rheumatoid arthritis	3	Rate	1992	0.636665	0.706841	0.571846
1	Deaths	119	Trinidad and Tobago	3	Both	27	Age-standardized	627	Rheumatoid arthritis	3	Rate	1992	1.1056	1.21823	0.99005
1	Deaths	84	Ireland	3	Both	22	All ages	627	Rheumatoid arthritis	1	Number	1990	62.0965	67.9205	56.8787
1	Deaths	84	Ireland	3	Both	22	All ages	627	Rheumatoid arthritis	2	Percent	1990	0.00197664	0.00215672	0.001815
1	Deaths	84	Ireland	3	Both	22	All ages	627	Rheumatoid arthritis	3	Rate	1990	1.72388	1.88557	1.57903
1	Deaths	84	Ireland	3	Both	27	Age-standardized	627	Rheumatoid arthritis	3	Rate	1990	1.49923	1.63061	1.3768
1	Deaths	83	Iceland	3	Both	22	All ages	627	Rheumatoid arthritis	1	Number	1990	1.47613	1.61122	1.32047
1	Deaths	83	Iceland	3	Both	22	All ages	627	Rheumatoid arthritis	2	Percent	1990	0.000848239	0.000928434	0.000761128
1	Deaths	83	Iceland	3	Both	22	All ages	627	Rheumatoid arthritis	3	Rate	1990	0.581398	0.634604	0.520089
1	Deaths	83	Iceland	3	Both	27	Age-standardized	627	Rheumatoid arthritis	3	Rate	1990	0.491288	0.535286	0.441418
1	Deaths	351	Guam	3	Both	22	All ages	627	Rheumatoid arthritis	1	Number	1992	0.000701857	0.000985895	0.000489332
1	Deaths	351	Guam	3	Both	22	All ages	627	Rheumatoid arthritis	2	Percent	1992	1.20152e-06	1.67141e-06	8.5249e-07
1	Deaths	351	Guam	3	Both	22	All ages	627	Rheumatoid arthritis	3	Rate	1992	0.000492048	0.000691177	0.000343054
1	Deaths	351	Guam	3	Both	27	Age-standardized	627	Rheumatoid arthritis	3	Rate	1992	0.000874752	0.00121149	0.000611669
1	Deaths	175	Burundi	3	Both	22	All ages	627	Rheumatoid arthritis	1	Number	1991	0.977408	8.60469	0.300548
1	Deaths	175	Burundi	3	Both	22	All ages	627	Rheumatoid arthritis	2	Percent	1991	1.00962e-05	8.78112e-05	3.13553e-06
1	Deaths	175	Burundi	3	Both	22	All ages	627	Rheumatoid arthritis	3	Rate	1991	0.0172127	0.151533	0.00529279
1	Deaths	175	Burundi	3	Both	27	Age-standardized	627	Rheumatoid arthritis	3	Rate	1991	0.0459669	0.403144	0.0143678
1	Deaths	27	Samoa	3	Both	22	All ages	627	Rheumatoid arthritis	1	Number	1991	0.00124061	0.0035198	0.000612965
1	Deaths	27	Samoa	3	Both	22	All ages	627	Rheumatoid arthritis	2	Percent	1991	1.23073e-06	3.46061e-06	6.12636e-07
1	Deaths	27	Samoa	3	Both	22	All ages	627	Rheumatoid arthritis	3	Rate	1991	0.000731437	0.0020752	0.000361392
1	Deaths	27	Samoa	3	Both	27	Age-standardized	627	Rheumatoid arthritis	3	Rate	1991	0.00140807	0.00414168	0.000684464
1	Deaths	19	Timor-Leste	3	Both	22	All ages	627	Rheumatoid arthritis	1	Number	1992	0.506347	0.720693	0.312773
1	Deaths	19	Timor-Leste	3	Both	22	All ages	627	Rheumatoid arthritis	2	Percent	1992	6.50764e-05	9.08108e-05	4.01448e-05
1	Deaths	19	Timor-Leste	3	Both	22	All ages	627	Rheumatoid arthritis	3	Rate	1992	0.0621791	0.0885007	0.0384083
1	Deaths	19	Timor-Leste	3	Both	27	Age-standardized	627	Rheumatoid arthritis	3	Rate	1992	0.250534	0.361453	0.142144
1	Deaths	51	Poland	3	Both	22	All ages	627	Rheumatoid arthritis	1	Number	1990	486.725	503.812	464.716
1	Deaths	51	Poland	3	Both	22	All ages	627	Rheumatoid arthritis	2	Percent	1990	0.00125605	0.00130069	0.00120101
1	Deaths	51	Poland	3	Both	22	All ages	627	Rheumatoid arthritis	3	Rate	1990	1.27506	1.31983	1.21741
1	Deaths	51	Poland	3	Both	27	Age-standardized	627	Rheumatoid arthritis	3	Rate	1990	1.10375	1.14344	1.05311
1	Deaths	67	Japan	3	Both	22	All ages	627	Rheumatoid arthritis	1	Number	1994	1545.19	1619.9	1400.16
1	Deaths	67	Japan	3	Both	22	All ages	627	Rheumatoid arthritis	2	Percent	1994	0.00175834	0.00184298	0.00159171
1	Deaths	67	Japan	3	Both	22	All ages	627	Rheumatoid arthritis	3	Rate	1994	1.2138	1.27248	1.09987
1	Deaths	67	Japan	3	Both	27	Age-standardized	627	Rheumatoid arthritis	3	Rate	1994	0.7994	0.838764	0.722784
1	Deaths	190	Uganda	3	Both	22	All ages	627	Rheumatoid arthritis	1	Number	1991	1.93199	14.4115	0.621318
1	Deaths	190	Uganda	3	Both	22	All ages	627	Rheumatoid arthritis	2	Percent	1991	6.43721e-06	4.97707e-05	2.0721e-06
1	Deaths	190	Uganda	3	Both	22	All ages	627	Rheumatoid arthritis	3	Rate	1991	0.0108309	0.080792	0.00348315
1	Deaths	190	Uganda	3	Both	27	Age-standardized	627	Rheumatoid arthritis	3	Rate	1991	0.0344151	0.26135	0.0108846
1	Deaths	67	Japan	3	Both	22	All ages	627	Rheumatoid arthritis	1	Number	1990	1549.81	1622.76	1423.72
1	Deaths	67	Japan	3	Both	22	All ages	627	Rheumatoid arthritis	2	Percent	1990	0.0019054	0.00199458	0.00175267
1	Deaths	67	Japan	3	Both	22	All ages	627	Rheumatoid arthritis	3	Rate	1990	1.23168	1.28966	1.13148
1	Deaths	67	Japan	3	Both	27	Age-standardized	627	Rheumatoid arthritis	3	Rate	1990	0.93539	0.98257	0.852667
1	Deaths	181	Madagascar	3	Both	22	All ages	627	Rheumatoid arthritis	1	Number	1990	1.4549	12.3467	0.442745
1	Deaths	181	Madagascar	3	Both	22	All ages	627	Rheumatoid arthritis	2	Percent	1990	9.90972e-06	8.41751e-05	3.04358e-06
1	Deaths	181	Madagascar	3	Both	22	All ages	627	Rheumatoid arthritis	3	Rate	1990	0.0122255	0.103749	0.00372037
1	Deaths	181	Madagascar	3	Both	27	Age-standardized	627	Rheumatoid arthritis	3	Rate	1990	0.0330814	0.275859	0.00982364
1	Deaths	149	Palestine	3	Both	22	All ages	627	Rheumatoid arthritis	1	Number	1990	0.849309	1.1814	0.543095
1	Deaths	149	Palestine	3	Both	22	All ages	627	Rheumatoid arthritis	2	Percent	1990	7.10938e-05	9.20773e-05	4.70376e-05
1	Deaths	149	Palestine	3	Both	22	All ages	627	Rheumatoid arthritis	3	Rate	1990	0.0414921	0.0577162	0.0265323
1	Deaths	149	Palestine	3	Both	27	Age-standardized	627	Rheumatoid arthritis	3	Rate	1990	0.100085	0.138066	0.0640345
1	Deaths	36	Kazakhstan	3	Both	22	All ages	627	Rheumatoid arthritis	1	Number	1992	1.13636	1.43577	0.916889
1	Deaths	36	Kazakhstan	3	Both	22	All ages	627	Rheumatoid arthritis	2	Percent	1992	7.89853e-06	9.95055e-06	6.45634e-06
1	Deaths	36	Kazakhstan	3	Both	22	All ages	627	Rheumatoid arthritis	3	Rate	1992	0.00701059	0.00885777	0.0056566
1	Deaths	36	Kazakhstan	3	Both	27	Age-standardized	627	Rheumatoid arthritis	3	Rate	1992	0.0098809	0.0128734	0.00791514
1	Deaths	108	Belize	3	Both	22	All ages	627	Rheumatoid arthritis	1	Number	1991	0.329085	0.417687	0.280239
1	Deaths	108	Belize	3	Both	22	All ages	627	Rheumatoid arthritis	2	Percent	1991	0.000355444	0.000463502	0.000302281
1	Deaths	108	Belize	3	Both	22	All ages	627	Rheumatoid arthritis	3	Rate	1991	0.171847	0.218115	0.14634
1	Deaths	108	Belize	3	Both	27	Age-standardized	627	Rheumatoid arthritis	3	Rate	1991	0.342495	0.426761	0.291048
1	Deaths	93	Sweden	3	Both	22	All ages	627	Rheumatoid arthritis	1	Number	1991	151.952	163.913	134.518
1	Deaths	93	Sweden	3	Both	22	All ages	627	Rheumatoid arthritis	2	Percent	1991	0.00160591	0.00172846	0.00142429
1	Deaths	93	Sweden	3	Both	22	All ages	627	Rheumatoid arthritis	3	Rate	1991	1.75743	1.89577	1.5558
1	Deaths	93	Sweden	3	Both	27	Age-standardized	627	Rheumatoid arthritis	3	Rate	1991	0.903448	0.973089	0.803781
1	Deaths	215	Sao Tome and Principe	3	Both	22	All ages	627	Rheumatoid arthritis	1	Number	1990	0.00420301	0.00813749	0.00163992
1	Deaths	215	Sao Tome and Principe	3	Both	22	All ages	627	Rheumatoid arthritis	2	Percent	1990	3.72453e-06	7.18946e-06	1.47089e-06
1	Deaths	215	Sao Tome and Principe	3	Both	22	All ages	627	Rheumatoid arthritis	3	Rate	1990	0.00346551	0.00670961	0.00135216
1	Deaths	215	Sao Tome and Principe	3	Both	27	Age-standardized	627	Rheumatoid arthritis	3	Rate	1990	0.00751171	0.014502	0.00297455
1	Deaths	193	Botswana	3	Both	22	All ages	627	Rheumatoid arthritis	1	Number	1991	3.24697	4.87279	1.69594
1	Deaths	193	Botswana	3	Both	22	All ages	627	Rheumatoid arthritis	2	Percent	1991	0.00028684	0.000405358	0.000147613
1	Deaths	193	Botswana	3	Both	22	All ages	627	Rheumatoid arthritis	3	Rate	1991	0.238294	0.357613	0.124465
1	Deaths	193	Botswana	3	Both	27	Age-standardized	627	Rheumatoid arthritis	3	Rate	1991	0.638294	0.935811	0.325726
1	Deaths	165	Pakistan	3	Both	22	All ages	627	Rheumatoid arthritis	1	Number	1990	477.582	703.161	293.52
1	Deaths	165	Pakistan	3	Both	22	All ages	627	Rheumatoid arthritis	2	Percent	1990	0.000462818	0.000678958	0.000280183
1	Deaths	165	Pakistan	3	Both	22	All ages	627	Rheumatoid arthritis	3	Rate	1990	0.429761	0.632753	0.264129
1	Deaths	165	Pakistan	3	Both	27	Age-standardized	627	Rheumatoid arthritis	3	Rate	1990	1.01412	1.53818	0.623587
1	Deaths	200	Benin	3	Both	22	All ages	627	Rheumatoid arthritis	1	Number	1992	0.157004	0.298583	0.0704829
1	Deaths	200	Benin	3	Both	22	All ages	627	Rheumatoid arthritis	2	Percent	1992	2.3016e-06	4.44372e-06	1.0184e-06
1	Deaths	200	Benin	3	Both	22	All ages	627	Rheumatoid arthritis	3	Rate	1992	0.00302449	0.0057518	0.00135776
1	Deaths	200	Benin	3	Both	27	Age-standardized	627	Rheumatoid arthritis	3	Rate	1992	0.008029	0.0151437	0.00369249
1	Deaths	182	Malawi	3	Both	22	All ages	627	Rheumatoid arthritis	1	Number	1992	1.43715	12.8137	0.474449
1	Deaths	182	Malawi	3	Both	22	All ages	627	Rheumatoid arthritis	2	Percent	1992	7.78211e-06	7.09135e-05	2.54556e-06
1	Deaths	182	Malawi	3	Both	22	All ages	627	Rheumatoid arthritis	3	Rate	1992	0.0137062	0.122205	0.00452487
1	Deaths	182	Malawi	3	Both	27	Age-standardized	627	Rheumatoid arthritis	3	Rate	1992	0.0425127	0.386762	0.0137549
1	Deaths	60	Lithuania	3	Both	22	All ages	627	Rheumatoid arthritis	1	Number	1991	33.7328	37.5477	30.2297
1	Deaths	60	Lithuania	3	Both	22	All ages	627	Rheumatoid arthritis	2	Percent	1991	0.000816911	0.000905857	0.000731022
1	Deaths	60	Lithuania	3	Both	22	All ages	627	Rheumatoid arthritis	3	Rate	1991	0.915461	1.01899	0.820392
1	Deaths	60	Lithuania	3	Both	27	Age-standardized	627	Rheumatoid arthritis	3	Rate	1991	0.750594	0.834127	0.673274
1	Deaths	118	Suriname	3	Both	22	All ages	627	Rheumatoid arthritis	1	Number	1992	0.420927	0.564469	0.302245
1	Deaths	118	Suriname	3	Both	22	All ages	627	Rheumatoid arthritis	2	Percent	1992	0.000154286	0.000207107	0.000112129
1	Deaths	118	Suriname	3	Both	22	All ages	627	Rheumatoid arthritis	3	Rate	1992	0.108002	0.144832	0.0775504
1	Deaths	118	Suriname	3	Both	27	Age-standardized	627	Rheumatoid arthritis	3	Rate	1992	0.176329	0.241111	0.126874
1	Deaths	84	Ireland	3	Both	22	All ages	627	Rheumatoid arthritis	1	Number	1992	59.7709	65.3126	54.6199
1	Deaths	84	Ireland	3	Both	22	All ages	627	Rheumatoid arthritis	2	Percent	1992	0.00191753	0.00209484	0.00174921
1	Deaths	84	Ireland	3	Both	22	All ages	627	Rheumatoid arthritis	3	Rate	1992	1.65479	1.80822	1.51219
1	Deaths	84	Ireland	3	Both	27	Age-standardized	627	Rheumatoid arthritis	3	Rate	1992	1.39325	1.51623	1.27097
1	Deaths	210	Liberia	3	Both	22	All ages	627	Rheumatoid arthritis	1	Number	1991	0.0929737	0.186781	0.0393983
1	Deaths	210	Liberia	3	Both	22	All ages	627	Rheumatoid arthritis	2	Percent	1991	2.32317e-06	4.62146e-06	9.99709e-07
1	Deaths	210	Liberia	3	Both	22	All ages	627	Rheumatoid arthritis	3	Rate	1991	0.00457034	0.00918164	0.00193672
1	Deaths	50	Montenegro	3	Both	22	All ages	627	Rheumatoid arthritis	1	Number	1994	1.14938	1.48968	0.835566
1	Deaths	50	Montenegro	3	Both	22	All ages	627	Rheumatoid arthritis	2	Percent	1994	0.000247235	0.000318229	0.000182187
1	Deaths	50	Montenegro	3	Both	22	All ages	627	Rheumatoid arthritis	3	Rate	1994	0.181576	0.235336	0.132001
1	Deaths	50	Montenegro	3	Both	27	Age-standardized	627	Rheumatoid arthritis	3	Rate	1994	0.173491	0.223087	0.125368
1	Deaths	43	Albania	3	Both	22	All ages	627	Rheumatoid arthritis	1	Number	1991	6.82055	9.01644	5.00519
1	Deaths	43	Albania	3	Both	22	All ages	627	Rheumatoid arthritis	2	Percent	1991	0.00038901	0.000514428	0.000282653
1	Deaths	43	Albania	3	Both	22	All ages	627	Rheumatoid arthritis	3	Rate	1991	0.205188	0.271249	0.150575
1	Deaths	43	Albania	3	Both	27	Age-standardized	627	Rheumatoid arthritis	3	Rate	1991	0.351151	0.46315	0.254987
1	Deaths	19	Timor-Leste	3	Both	22	All ages	627	Rheumatoid arthritis	1	Number	1994	0.530596	0.759203	0.316721
1	Deaths	19	Timor-Leste	3	Both	22	All ages	627	Rheumatoid arthritis	2	Percent	1994	7.10237e-05	0.000100925	4.23273e-05
1	Deaths	19	Timor-Leste	3	Both	22	All ages	627	Rheumatoid arthritis	3	Rate	1994	0.0631048	0.0902935	0.0376682
1	Deaths	19	Timor-Leste	3	Both	27	Age-standardized	627	Rheumatoid arthritis	3	Rate	1994	0.248023	0.360482	0.139387
1	Deaths	320	Cook Islands	3	Both	22	All ages	627	Rheumatoid arthritis	1	Number	1992	4.2327e-06	1.43494e-05	1.72393e-06
1	Deaths	320	Cook Islands	3	Both	22	All ages	627	Rheumatoid arthritis	2	Percent	1992	3.45902e-08	1.14554e-07	1.41444e-08
1	Deaths	320	Cook Islands	3	Both	22	All ages	627	Rheumatoid arthritis	3	Rate	1992	2.20959e-05	7.49081e-05	8.99943e-06
1	Deaths	320	Cook Islands	3	Both	27	Age-standardized	627	Rheumatoid arthritis	3	Rate	1992	2.80607e-05	9.07626e-05	1.17449e-05
1	Deaths	393	Saint Kitts and Nevis	3	Both	22	All ages	627	Rheumatoid arthritis	1	Number	1991	0.221817	0.274691	0.162224
1	Deaths	393	Saint Kitts and Nevis	3	Both	22	All ages	627	Rheumatoid arthritis	2	Percent	1991	0.000565995	0.000698271	0.0004099
1	Deaths	393	Saint Kitts and Nevis	3	Both	22	All ages	627	Rheumatoid arthritis	3	Rate	1991	0.534552	0.661971	0.390939
1	Deaths	393	Saint Kitts and Nevis	3	Both	27	Age-standardized	627	Rheumatoid arthritis	3	Rate	1991	0.718636	0.899541	0.522032
1	Deaths	61	Republic of Moldova	3	Both	22	All ages	627	Rheumatoid arthritis	1	Number	1991	8.38104	9.33619	7.51149
1	Deaths	61	Republic of Moldova	3	Both	22	All ages	627	Rheumatoid arthritis	2	Percent	1991	0.000182787	0.00020328	0.00016351
1	Deaths	61	Republic of Moldova	3	Both	22	All ages	627	Rheumatoid arthritis	3	Rate	1991	0.18836	0.209826	0.168817
1	Deaths	61	Republic of Moldova	3	Both	27	Age-standardized	627	Rheumatoid arthritis	3	Rate	1991	0.184038	0.205329	0.164325
1	Deaths	85	Israel	3	Both	22	All ages	627	Rheumatoid arthritis	1	Number	1992	13.105	14.5361	11.572
1	Deaths	85	Israel	3	Both	22	All ages	627	Rheumatoid arthritis	2	Percent	1992	0.00040146	0.000444996	0.000355202
1	Deaths	85	Israel	3	Both	22	All ages	627	Rheumatoid arthritis	3	Rate	1992	0.250028	0.277332	0.220782
1	Deaths	85	Israel	3	Both	27	Age-standardized	627	Rheumatoid arthritis	3	Rate	1992	0.253814	0.282093	0.224711
1	Deaths	52	Romania	3	Both	22	All ages	627	Rheumatoid arthritis	1	Number	1992	0.814755	0.967818	0.682763
1	Deaths	52	Romania	3	Both	22	All ages	627	Rheumatoid arthritis	2	Percent	1992	3.12196e-06	3.71443e-06	2.60719e-06
1	Deaths	52	Romania	3	Both	22	All ages	627	Rheumatoid arthritis	3	Rate	1992	0.00349681	0.00415374	0.00293032
1	Deaths	52	Romania	3	Both	27	Age-standardized	627	Rheumatoid arthritis	3	Rate	1992	0.00290829	0.00343702	0.00244072
1	Deaths	215	Sao Tome and Principe	3	Both	22	All ages	627	Rheumatoid arthritis	1	Number	1992	0.00414739	0.00792423	0.00163722
1	Deaths	215	Sao Tome and Principe	3	Both	22	All ages	627	Rheumatoid arthritis	2	Percent	1992	3.62554e-06	6.85384e-06	1.47074e-06
1	Deaths	215	Sao Tome and Principe	3	Both	22	All ages	627	Rheumatoid arthritis	3	Rate	1992	0.00328951	0.00628513	0.00129856
1	Deaths	215	Sao Tome and Principe	3	Both	27	Age-standardized	627	Rheumatoid arthritis	3	Rate	1992	0.00738508	0.0140249	0.00293814
1	Deaths	35	Georgia	3	Both	22	All ages	627	Rheumatoid arthritis	1	Number	1990	0.190755	0.231862	0.153212
1	Deaths	35	Georgia	3	Both	22	All ages	627	Rheumatoid arthritis	2	Percent	1990	3.46968e-06	4.19935e-06	2.78537e-06
1	Deaths	35	Georgia	3	Both	22	All ages	627	Rheumatoid arthritis	3	Rate	1990	0.00345381	0.00419809	0.00277407
1	Deaths	35	Georgia	3	Both	27	Age-standardized	627	Rheumatoid arthritis	3	Rate	1990	0.0034672	0.00423207	0.00275935
1	Deaths	143	Iraq	3	Both	22	All ages	627	Rheumatoid arthritis	1	Number	1991	3.93644	5.33534	2.64824
1	Deaths	143	Iraq	3	Both	22	All ages	627	Rheumatoid arthritis	2	Percent	1991	3.26488e-05	4.26674e-05	2.27967e-05
1	Deaths	143	Iraq	3	Both	22	All ages	627	Rheumatoid arthritis	3	Rate	1991	0.0210897	0.0285844	0.0141881
1	Deaths	143	Iraq	3	Both	27	Age-standardized	627	Rheumatoid arthritis	3	Rate	1991	0.0446332	0.0615041	0.0299283
1	Deaths	349	Greenland	3	Both	22	All ages	627	Rheumatoid arthritis	1	Number	1990	0.127659	0.185221	0.0959867
1	Deaths	349	Greenland	3	Both	22	All ages	627	Rheumatoid arthritis	2	Percent	1990	0.000279995	0.000410822	0.000211764
1	Deaths	349	Greenland	3	Both	22	All ages	627	Rheumatoid arthritis	3	Rate	1990	0.229771	0.333374	0.172764
1	Deaths	349	Greenland	3	Both	27	Age-standardized	627	Rheumatoid arthritis	3	Rate	1990	0.450853	0.626623	0.343994
1	Deaths	110	Dominica	3	Both	22	All ages	627	Rheumatoid arthritis	1	Number	1991	0.31214	0.393815	0.231556
1	Deaths	110	Dominica	3	Both	22	All ages	627	Rheumatoid arthritis	2	Percent	1991	0.00056289	0.000702826	0.000422088
1	Deaths	110	Dominica	3	Both	22	All ages	627	Rheumatoid arthritis	3	Rate	1991	0.433107	0.546434	0.321294
1	Deaths	110	Dominica	3	Both	27	Age-standardized	627	Rheumatoid arthritis	3	Rate	1991	0.588797	0.74082	0.432239
1	Deaths	141	Egypt	3	Both	22	All ages	627	Rheumatoid arthritis	1	Number	1991	22.6111	30.2178	16.1786
1	Deaths	141	Egypt	3	Both	22	All ages	627	Rheumatoid arthritis	2	Percent	1991	5.0005e-05	6.68135e-05	3.56564e-05
1	Deaths	141	Egypt	3	Both	22	All ages	627	Rheumatoid arthritis	3	Rate	1991	0.040068	0.0535473	0.0286693
1	Deaths	141	Egypt	3	Both	27	Age-standardized	627	Rheumatoid arthritis	3	Rate	1991	0.0964614	0.132564	0.0651198
1	Deaths	385	Puerto Rico	3	Both	22	All ages	627	Rheumatoid arthritis	1	Number	1991	20.6256	22.6434	18.4743
1	Deaths	385	Puerto Rico	3	Both	22	All ages	627	Rheumatoid arthritis	2	Percent	1991	0.000779996	0.000856617	0.000700319
1	Deaths	385	Puerto Rico	3	Both	22	All ages	627	Rheumatoid arthritis	3	Rate	1991	0.565836	0.621192	0.506818
1	Deaths	385	Puerto Rico	3	Both	27	Age-standardized	627	Rheumatoid arthritis	3	Rate	1991	0.64351	0.703397	0.578004
1	Deaths	351	Guam	3	Both	22	All ages	627	Rheumatoid arthritis	1	Number	1990	0.000665172	0.000943443	0.000467796
1	Deaths	351	Guam	3	Both	22	All ages	627	Rheumatoid arthritis	2	Percent	1990	1.21303e-06	1.71876e-06	8.64792e-07
1	Deaths	351	Guam	3	Both	22	All ages	627	Rheumatoid arthritis	3	Rate	1990	0.00048621	0.000689613	0.000341937
1	Deaths	351	Guam	3	Both	27	Age-standardized	627	Rheumatoid arthritis	3	Rate	1990	0.00091139	0.00127745	0.000641222
1	Deaths	87	Luxembourg	3	Both	22	All ages	627	Rheumatoid arthritis	1	Number	1992	2.4308	2.65892	2.19836
1	Deaths	87	Luxembourg	3	Both	22	All ages	627	Rheumatoid arthritis	2	Percent	1992	0.000636023	0.000689354	0.000578548
1	Deaths	87	Luxembourg	3	Both	22	All ages	627	Rheumatoid arthritis	3	Rate	1992	0.625232	0.683906	0.565445
1	Deaths	87	Luxembourg	3	Both	27	Age-standardized	627	Rheumatoid arthritis	3	Rate	1992	0.425685	0.463707	0.38665
1	Deaths	69	Singapore	3	Both	22	All ages	627	Rheumatoid arthritis	1	Number	1990	3.32088	3.66064	2.97158
1	Deaths	69	Singapore	3	Both	22	All ages	627	Rheumatoid arthritis	2	Percent	1990	0.000238027	0.000261074	0.00021341
1	Deaths	69	Singapore	3	Both	22	All ages	627	Rheumatoid arthritis	3	Rate	1990	0.108981	0.120131	0.0975184
1	Deaths	69	Singapore	3	Both	27	Age-standardized	627	Rheumatoid arthritis	3	Rate	1990	0.168673	0.186722	0.150397
1	Deaths	30	Vanuatu	3	Both	22	All ages	627	Rheumatoid arthritis	1	Number	1991	0.00101002	0.00287816	0.000472638
1	Deaths	30	Vanuatu	3	Both	22	All ages	627	Rheumatoid arthritis	2	Percent	1991	9.5325e-07	2.71487e-06	4.60389e-07
1	Deaths	30	Vanuatu	3	Both	22	All ages	627	Rheumatoid arthritis	3	Rate	1991	0.00064799	0.00184652	0.000303227
1	Deaths	30	Vanuatu	3	Both	27	Age-standardized	627	Rheumatoid arthritis	3	Rate	1991	0.00147389	0.00453875	0.0007016
1	Deaths	35	Georgia	3	Both	22	All ages	627	Rheumatoid arthritis	1	Number	1994	0.987162	1.14814	0.846322
1	Deaths	35	Georgia	3	Both	22	All ages	627	Rheumatoid arthritis	2	Percent	1994	1.88413e-05	2.19376e-05	1.61053e-05
1	Deaths	35	Georgia	3	Both	22	All ages	627	Rheumatoid arthritis	3	Rate	1994	0.0186257	0.0216629	0.0159683
1	Deaths	35	Georgia	3	Both	27	Age-standardized	627	Rheumatoid arthritis	3	Rate	1994	0.0162326	0.018871	0.0139159
1	Deaths	36	Kazakhstan	3	Both	22	All ages	627	Rheumatoid arthritis	1	Number	1994	3.87239	4.99374	3.02585
1	Deaths	36	Kazakhstan	3	Both	22	All ages	627	Rheumatoid arthritis	2	Percent	1994	2.405e-05	3.1163e-05	1.89353e-05
1	Deaths	36	Kazakhstan	3	Both	22	All ages	627	Rheumatoid arthritis	3	Rate	1994	0.0243921	0.0314555	0.0190598
1	Deaths	36	Kazakhstan	3	Both	27	Age-standardized	627	Rheumatoid arthritis	3	Rate	1994	0.0341264	0.0448924	0.0264564
1	Deaths	36	Kazakhstan	3	Both	22	All ages	627	Rheumatoid arthritis	1	Number	1990	0.892858	1.13335	0.723293
1	Deaths	36	Kazakhstan	3	Both	22	All ages	627	Rheumatoid arthritis	2	Percent	1990	6.79841e-06	8.5615e-06	5.5656e-06
1	Deaths	36	Kazakhstan	3	Both	22	All ages	627	Rheumatoid arthritis	3	Rate	1990	0.00544662	0.00691366	0.00441223
1	Deaths	36	Kazakhstan	3	Both	27	Age-standardized	627	Rheumatoid arthritis	3	Rate	1990	0.00778782	0.0100911	0.00624875
1	Deaths	152	Saudi Arabia	3	Both	22	All ages	627	Rheumatoid arthritis	1	Number	1992	3.73754	5.80497	2.41408
1	Deaths	152	Saudi Arabia	3	Both	22	All ages	627	Rheumatoid arthritis	2	Percent	1992	4.4877e-05	6.65445e-05	3.11785e-05
1	Deaths	152	Saudi Arabia	3	Both	22	All ages	627	Rheumatoid arthritis	3	Rate	1992	0.0219038	0.03402	0.0141477
1	Deaths	152	Saudi Arabia	3	Both	27	Age-standardized	627	Rheumatoid arthritis	3	Rate	1992	0.0597967	0.0966646	0.0369569
1	Deaths	182	Malawi	3	Both	22	All ages	627	Rheumatoid arthritis	1	Number	1990	1.35971	12.5444	0.4679
1	Deaths	182	Malawi	3	Both	22	All ages	627	Rheumatoid arthritis	2	Percent	1990	8.03342e-06	7.51287e-05	2.70843e-06
1	Deaths	182	Malawi	3	Both	22	All ages	627	Rheumatoid arthritis	3	Rate	1990	0.0138665	0.12793	0.00477172
1	Deaths	182	Malawi	3	Both	27	Age-standardized	627	Rheumatoid arthritis	3	Rate	1990	0.0424687	0.394404	0.0142356
1	Deaths	135	Brazil	3	Both	22	All ages	627	Rheumatoid arthritis	1	Number	1992	245.012	257.263	230.749
1	Deaths	135	Brazil	3	Both	22	All ages	627	Rheumatoid arthritis	2	Percent	1992	0.000276375	0.000291676	0.000258226
1	Deaths	135	Brazil	3	Both	22	All ages	627	Rheumatoid arthritis	3	Rate	1992	0.159822	0.167814	0.150518
1	Deaths	135	Brazil	3	Both	27	Age-standardized	627	Rheumatoid arthritis	3	Rate	1992	0.267262	0.282057	0.248333
1	Deaths	150	Oman	3	Both	22	All ages	627	Rheumatoid arthritis	1	Number	1990	0.275227	0.4363	0.1787
1	Deaths	150	Oman	3	Both	22	All ages	627	Rheumatoid arthritis	2	Percent	1990	3.01989e-05	4.60384e-05	2.1201e-05
1	Deaths	150	Oman	3	Both	22	All ages	627	Rheumatoid arthritis	3	Rate	1990	0.0138695	0.0219864	0.00900522
1	Deaths	150	Oman	3	Both	27	Age-standardized	627	Rheumatoid arthritis	3	Rate	1990	0.0408102	0.0661265	0.0258331
1	Deaths	84	Ireland	3	Both	22	All ages	627	Rheumatoid arthritis	1	Number	1994	55.9175	60.9392	50.6418
1	Deaths	84	Ireland	3	Both	22	All ages	627	Rheumatoid arthritis	2	Percent	1994	0.00178272	0.00194091	0.00161759
1	Deaths	84	Ireland	3	Both	22	All ages	627	Rheumatoid arthritis	3	Rate	1994	1.53488	1.67272	1.39007
1	Deaths	84	Ireland	3	Both	27	Age-standardized	627	Rheumatoid arthritis	3	Rate	1994	1.27623	1.38595	1.16174
1	Deaths	176	Comoros	3	Both	22	All ages	627	Rheumatoid arthritis	1	Number	1991	0.0671271	0.591816	0.0219908
1	Deaths	176	Comoros	3	Both	22	All ages	627	Rheumatoid arthritis	2	Percent	1991	1.33439e-05	0.000121215	4.56832e-06
1	Deaths	176	Comoros	3	Both	22	All ages	627	Rheumatoid arthritis	3	Rate	1991	0.014203	0.125219	0.00465291
1	Deaths	176	Comoros	3	Both	27	Age-standardized	627	Rheumatoid arthritis	3	Rate	1991	0.0385285	0.335256	0.0126326
1	Deaths	19	Timor-Leste	3	Both	22	All ages	627	Rheumatoid arthritis	1	Number	1990	0.488533	0.680581	0.304004
1	Deaths	19	Timor-Leste	3	Both	22	All ages	627	Rheumatoid arthritis	2	Percent	1990	6.14351e-05	8.60983e-05	3.91671e-05
1	Deaths	19	Timor-Leste	3	Both	22	All ages	627	Rheumatoid arthritis	3	Rate	1990	0.0625409	0.0871263	0.0389178
1	Deaths	19	Timor-Leste	3	Both	27	Age-standardized	627	Rheumatoid arthritis	3	Rate	1990	0.253425	0.363358	0.146726
1	Deaths	185	Rwanda	3	Both	22	All ages	627	Rheumatoid arthritis	1	Number	1992	1.39901	12.7698	0.46935
1	Deaths	185	Rwanda	3	Both	22	All ages	627	Rheumatoid arthritis	2	Percent	1992	1.18405e-05	0.000106489	3.99962e-06
1	Deaths	185	Rwanda	3	Both	22	All ages	627	Rheumatoid arthritis	3	Rate	1992	0.0185796	0.16959	0.00623323
1	Deaths	185	Rwanda	3	Both	27	Age-standardized	627	Rheumatoid arthritis	3	Rate	1992	0.0560942	0.496579	0.0184013
1	Deaths	117	Saint Vincent and the Grenadines	3	Both	22	All ages	627	Rheumatoid arthritis	1	Number	1990	0.200151	0.221649	0.179049
1	Deaths	117	Saint Vincent and the Grenadines	3	Both	22	All ages	627	Rheumatoid arthritis	2	Percent	1990	0.000275314	0.000304386	0.000247358
1	Deaths	117	Saint Vincent and the Grenadines	3	Both	22	All ages	627	Rheumatoid arthritis	3	Rate	1990	0.182783	0.202415	0.163511
1	Deaths	117	Saint Vincent and the Grenadines	3	Both	27	Age-standardized	627	Rheumatoid arthritis	3	Rate	1990	0.337331	0.373573	0.299641
1	Deaths	28	Solomon Islands	3	Both	22	All ages	627	Rheumatoid arthritis	1	Number	1991	0.00262197	0.00658184	0.0010761
1	Deaths	28	Solomon Islands	3	Both	22	All ages	627	Rheumatoid arthritis	2	Percent	1991	9.60052e-07	2.51295e-06	3.99649e-07
1	Deaths	28	Solomon Islands	3	Both	22	All ages	627	Rheumatoid arthritis	3	Rate	1991	0.00074951	0.00188147	0.000307611
1	Deaths	28	Solomon Islands	3	Both	27	Age-standardized	627	Rheumatoid arthritis	3	Rate	1991	0.00165094	0.00457597	0.000699652
1	Deaths	102	United States of America	3	Both	22	All ages	627	Rheumatoid arthritis	1	Number	1992	1711.06	1787.86	1551.54
1	Deaths	102	United States of America	3	Both	22	All ages	627	Rheumatoid arthritis	2	Percent	1992	0.00078454	0.000820332	0.000710073
1	Deaths	102	United States of America	3	Both	22	All ages	627	Rheumatoid arthritis	3	Rate	1992	0.658952	0.688528	0.597521
1	Deaths	102	United States of America	3	Both	27	Age-standardized	627	Rheumatoid arthritis	3	Rate	1992	0.493064	0.514295	0.449436
1	Deaths	51	Poland	3	Both	22	All ages	627	Rheumatoid arthritis	1	Number	1994	505.971	524.718	482.883
1	Deaths	51	Poland	3	Both	22	All ages	627	Rheumatoid arthritis	2	Percent	1994	0.001315	0.001363	0.00125588
1	Deaths	51	Poland	3	Both	22	All ages	627	Rheumatoid arthritis	3	Rate	1994	1.31655	1.36533	1.25647
1	Deaths	51	Poland	3	Both	27	Age-standardized	627	Rheumatoid arthritis	3	Rate	1994	1.09616	1.13747	1.04574
1	Deaths	117	Saint Vincent and the Grenadines	3	Both	22	All ages	627	Rheumatoid arthritis	1	Number	1994	0.195957	0.219065	0.174221
1	Deaths	117	Saint Vincent and the Grenadines	3	Both	22	All ages	627	Rheumatoid arthritis	2	Percent	1994	0.000257596	0.000287645	0.000225536
1	Deaths	117	Saint Vincent and the Grenadines	3	Both	22	All ages	627	Rheumatoid arthritis	3	Rate	1994	0.17792	0.198901	0.158185
1	Deaths	117	Saint Vincent and the Grenadines	3	Both	27	Age-standardized	627	Rheumatoid arthritis	3	Rate	1994	0.306499	0.343569	0.271041
1	Deaths	380	Palau	3	Both	22	All ages	627	Rheumatoid arthritis	1	Number	1991	0.000441669	0.000705991	0.000276084
1	Deaths	380	Palau	3	Both	22	All ages	627	Rheumatoid arthritis	2	Percent	1991	3.58788e-06	5.36354e-06	2.30746e-06
1	Deaths	380	Palau	3	Both	22	All ages	627	Rheumatoid arthritis	3	Rate	1991	0.00283205	0.00452692	0.00177029
1	Deaths	380	Palau	3	Both	27	Age-standardized	627	Rheumatoid arthritis	3	Rate	1991	0.00437256	0.00683775	0.00271519
1	Deaths	87	Luxembourg	3	Both	22	All ages	627	Rheumatoid arthritis	1	Number	1990	2.51401	2.75098	2.29047
1	Deaths	87	Luxembourg	3	Both	22	All ages	627	Rheumatoid arthritis	2	Percent	1990	0.00065412	0.000712948	0.000597437
1	Deaths	87	Luxembourg	3	Both	22	All ages	627	Rheumatoid arthritis	3	Rate	1990	0.659542	0.721708	0.600895
1	Deaths	87	Luxembourg	3	Both	27	Age-standardized	627	Rheumatoid arthritis	3	Rate	1990	0.454874	0.497781	0.414751
1	Deaths	119	Trinidad and Tobago	3	Both	22	All ages	627	Rheumatoid arthritis	1	Number	1990	7.40826	8.2501	6.4788
1	Deaths	119	Trinidad and Tobago	3	Both	22	All ages	627	Rheumatoid arthritis	2	Percent	1990	0.000878973	0.000967471	0.000776283
1	Deaths	119	Trinidad and Tobago	3	Both	22	All ages	627	Rheumatoid arthritis	3	Rate	1990	0.614894	0.684768	0.537748
1	Deaths	119	Trinidad and Tobago	3	Both	27	Age-standardized	627	Rheumatoid arthritis	3	Rate	1990	1.215	1.34974	1.0705
1	Deaths	10	Cambodia	3	Both	22	All ages	627	Rheumatoid arthritis	1	Number	1991	12.9086	17.7038	7.62797
1	Deaths	10	Cambodia	3	Both	22	All ages	627	Rheumatoid arthritis	2	Percent	1991	0.000112757	0.000152018	6.69752e-05
1	Deaths	10	Cambodia	3	Both	22	All ages	627	Rheumatoid arthritis	3	Rate	1991	0.122356	0.167808	0.0723026
1	Deaths	10	Cambodia	3	Both	27	Age-standardized	627	Rheumatoid arthritis	3	Rate	1991	0.364354	0.510557	0.209941
1	Deaths	216	Senegal	3	Both	22	All ages	627	Rheumatoid arthritis	1	Number	1990	0.22709	0.440075	0.0921791
1	Deaths	216	Senegal	3	Both	22	All ages	627	Rheumatoid arthritis	2	Percent	1990	2.62004e-06	5.22141e-06	1.07447e-06
1	Deaths	216	Senegal	3	Both	22	All ages	627	Rheumatoid arthritis	3	Rate	1990	0.00297535	0.0057659	0.00120774
1	Deaths	216	Senegal	3	Both	27	Age-standardized	627	Rheumatoid arthritis	3	Rate	1990	0.00877359	0.0167957	0.00362304
1	Deaths	435	South Sudan	3	Both	22	All ages	627	Rheumatoid arthritis	1	Number	1990	0.848482	6.75108	0.301157
1	Deaths	435	South Sudan	3	Both	22	All ages	627	Rheumatoid arthritis	2	Percent	1990	9.54873e-06	7.73814e-05	3.48439e-06
1	Deaths	435	South Sudan	3	Both	22	All ages	627	Rheumatoid arthritis	3	Rate	1990	0.0144363	0.114865	0.00512398
1	Deaths	435	South Sudan	3	Both	27	Age-standardized	627	Rheumatoid arthritis	3	Rate	1990	0.0377375	0.303568	0.0132218
1	Deaths	183	Mauritius	3	Both	22	All ages	627	Rheumatoid arthritis	1	Number	1990	0.108487	0.121805	0.0963921
1	Deaths	183	Mauritius	3	Both	22	All ages	627	Rheumatoid arthritis	2	Percent	1990	1.57715e-05	1.75422e-05	1.41923e-05
1	Deaths	183	Mauritius	3	Both	22	All ages	627	Rheumatoid arthritis	3	Rate	1990	0.00989893	0.0111141	0.0087953
1	Deaths	183	Mauritius	3	Both	27	Age-standardized	627	Rheumatoid arthritis	3	Rate	1990	0.0199172	0.0222803	0.0175179
1	Deaths	45	Bulgaria	3	Both	22	All ages	627	Rheumatoid arthritis	1	Number	1991	14.7377	16.6343	13.3285
1	Deaths	45	Bulgaria	3	Both	22	All ages	627	Rheumatoid arthritis	2	Percent	1991	0.000130929	0.000147142	0.00011827
1	Deaths	45	Bulgaria	3	Both	22	All ages	627	Rheumatoid arthritis	3	Rate	1991	0.171128	0.19315	0.154764
1	Deaths	45	Bulgaria	3	Both	27	Age-standardized	627	Rheumatoid arthritis	3	Rate	1991	0.125062	0.139763	0.11431
1	Deaths	52	Romania	3	Both	22	All ages	627	Rheumatoid arthritis	1	Number	1994	0.853332	0.999464	0.725458
1	Deaths	52	Romania	3	Both	22	All ages	627	Rheumatoid arthritis	2	Percent	1994	3.17987e-06	3.72821e-06	2.70796e-06
1	Deaths	52	Romania	3	Both	22	All ages	627	Rheumatoid arthritis	3	Rate	1994	0.00369131	0.00432344	0.00313816
1	Deaths	52	Romania	3	Both	27	Age-standardized	627	Rheumatoid arthritis	3	Rate	1994	0.00298955	0.00348684	0.0025503
1	Deaths	102	United States of America	3	Both	22	All ages	627	Rheumatoid arthritis	1	Number	1994	1899.24	1990.5	1713.79
1	Deaths	102	United States of America	3	Both	22	All ages	627	Rheumatoid arthritis	2	Percent	1994	0.000832454	0.000872033	0.000750624
1	Deaths	102	United States of America	3	Both	22	All ages	627	Rheumatoid arthritis	3	Rate	1994	0.716593	0.751027	0.646622
1	Deaths	102	United States of America	3	Both	27	Age-standardized	627	Rheumatoid arthritis	3	Rate	1994	0.52874	0.552793	0.480458
1	Deaths	54	Slovakia	3	Both	22	All ages	627	Rheumatoid arthritis	1	Number	1994	14.4323	17.3497	11.5271
1	Deaths	54	Slovakia	3	Both	22	All ages	627	Rheumatoid arthritis	2	Percent	1994	0.000280675	0.000338777	0.000223251
1	Deaths	54	Slovakia	3	Both	22	All ages	627	Rheumatoid arthritis	3	Rate	1994	0.269697	0.324214	0.215407
1	Deaths	54	Slovakia	3	Both	27	Age-standardized	627	Rheumatoid arthritis	3	Rate	1994	0.232456	0.280165	0.184685
1	Deaths	152	Saudi Arabia	3	Both	22	All ages	627	Rheumatoid arthritis	1	Number	1990	3.44504	5.47246	2.11922
1	Deaths	152	Saudi Arabia	3	Both	22	All ages	627	Rheumatoid arthritis	2	Percent	1990	4.12619e-05	6.40496e-05	2.7568e-05
1	Deaths	152	Saudi Arabia	3	Both	22	All ages	627	Rheumatoid arthritis	3	Rate	1990	0.0217265	0.0345126	0.0133651
1	Deaths	152	Saudi Arabia	3	Both	27	Age-standardized	627	Rheumatoid arthritis	3	Rate	1990	0.0589588	0.0989207	0.034519
1	Deaths	39	Tajikistan	3	Both	22	All ages	627	Rheumatoid arthritis	1	Number	1992	0.962903	1.91246	0.56703
1	Deaths	39	Tajikistan	3	Both	22	All ages	627	Rheumatoid arthritis	2	Percent	1992	1.92586e-05	3.79279e-05	1.14742e-05
1	Deaths	39	Tajikistan	3	Both	22	All ages	627	Rheumatoid arthritis	3	Rate	1992	0.0172186	0.0341986	0.0101396
1	Deaths	39	Tajikistan	3	Both	27	Age-standardized	627	Rheumatoid arthritis	3	Rate	1992	0.0372289	0.0734976	0.0216176
1	Deaths	105	Antigua and Barbuda	3	Both	22	All ages	627	Rheumatoid arthritis	1	Number	1992	0.264761	0.301561	0.229942
1	Deaths	105	Antigua and Barbuda	3	Both	22	All ages	627	Rheumatoid arthritis	2	Percent	1992	0.000569391	0.000639948	0.000498751
1	Deaths	105	Antigua and Barbuda	3	Both	22	All ages	627	Rheumatoid arthritis	3	Rate	1992	0.425533	0.484679	0.369572
1	Deaths	105	Antigua and Barbuda	3	Both	27	Age-standardized	627	Rheumatoid arthritis	3	Rate	1992	0.443344	0.500534	0.386779
1	Deaths	161	Bangladesh	3	Both	22	All ages	627	Rheumatoid arthritis	1	Number	1991	328.051	507.507	202.269
1	Deaths	161	Bangladesh	3	Both	22	All ages	627	Rheumatoid arthritis	2	Percent	1991	0.000263361	0.00040933	0.000162028
1	Deaths	161	Bangladesh	3	Both	22	All ages	627	Rheumatoid arthritis	3	Rate	1991	0.29434	0.455355	0.181483
1	Deaths	161	Bangladesh	3	Both	27	Age-standardized	627	Rheumatoid arthritis	3	Rate	1991	0.84127	1.32381	0.512225
1	Deaths	85	Israel	3	Both	22	All ages	627	Rheumatoid arthritis	1	Number	1990	11.5757	12.8562	10.2866
1	Deaths	85	Israel	3	Both	22	All ages	627	Rheumatoid arthritis	2	Percent	1990	0.000394663	0.000439079	0.000351775
1	Deaths	85	Israel	3	Both	22	All ages	627	Rheumatoid arthritis	3	Rate	1990	0.233332	0.259142	0.207348
1	Deaths	85	Israel	3	Both	27	Age-standardized	627	Rheumatoid arthritis	3	Rate	1990	0.24266	0.270948	0.214912
1	Deaths	54	Slovakia	3	Both	22	All ages	627	Rheumatoid arthritis	1	Number	1990	14.9005	18.4316	11.4896
1	Deaths	54	Slovakia	3	Both	22	All ages	627	Rheumatoid arthritis	2	Percent	1990	0.00027045	0.00033375	0.000206061
1	Deaths	54	Slovakia	3	Both	22	All ages	627	Rheumatoid arthritis	3	Rate	1990	0.282033	0.348868	0.217473
1	Deaths	54	Slovakia	3	Both	27	Age-standardized	627	Rheumatoid arthritis	3	Rate	1990	0.249212	0.304924	0.191684
1	Deaths	117	Saint Vincent and the Grenadines	3	Both	22	All ages	627	Rheumatoid arthritis	1	Number	1992	0.210829	0.235465	0.186676
1	Deaths	117	Saint Vincent and the Grenadines	3	Both	22	All ages	627	Rheumatoid arthritis	2	Percent	1992	0.000281567	0.000310771	0.000251212
1	Deaths	117	Saint Vincent and the Grenadines	3	Both	22	All ages	627	Rheumatoid arthritis	3	Rate	1992	0.191782	0.214192	0.169811
1	Deaths	117	Saint Vincent and the Grenadines	3	Both	27	Age-standardized	627	Rheumatoid arthritis	3	Rate	1992	0.341475	0.381862	0.300084
1	Deaths	72	New Zealand	3	Both	22	All ages	627	Rheumatoid arthritis	1	Number	1990	42.6678	46.9737	38.2716
1	Deaths	72	New Zealand	3	Both	22	All ages	627	Rheumatoid arthritis	2	Percent	1990	0.00161132	0.00177159	0.00144723
1	Deaths	72	New Zealand	3	Both	22	All ages	627	Rheumatoid arthritis	3	Rate	1990	1.24859	1.37459	1.11994
1	Deaths	72	New Zealand	3	Both	27	Age-standardized	627	Rheumatoid arthritis	3	Rate	1990	1.06412	1.16863	0.950441
1	Deaths	69	Singapore	3	Both	22	All ages	627	Rheumatoid arthritis	1	Number	1994	3.10164	3.4183	2.78775
1	Deaths	69	Singapore	3	Both	22	All ages	627	Rheumatoid arthritis	2	Percent	1994	0.000210328	0.000231454	0.000189469
1	Deaths	69	Singapore	3	Both	22	All ages	627	Rheumatoid arthritis	3	Rate	1994	0.0907169	0.0999785	0.081536
1	Deaths	69	Singapore	3	Both	27	Age-standardized	627	Rheumatoid arthritis	3	Rate	1994	0.135882	0.150453	0.121588
1	Deaths	435	South Sudan	3	Both	22	All ages	627	Rheumatoid arthritis	1	Number	1992	0.85975	6.7544	0.29851
1	Deaths	435	South Sudan	3	Both	22	All ages	627	Rheumatoid arthritis	2	Percent	1992	9.56198e-06	7.51195e-05	3.32957e-06
1	Deaths	435	South Sudan	3	Both	22	All ages	627	Rheumatoid arthritis	3	Rate	1992	0.0140605	0.110463	0.00488189
1	Deaths	435	South Sudan	3	Both	27	Age-standardized	627	Rheumatoid arthritis	3	Rate	1992	0.0372103	0.2905	0.0126975
1	Deaths	63	Ukraine	3	Both	22	All ages	627	Rheumatoid arthritis	1	Number	1991	133.936	158.978	95.052
1	Deaths	63	Ukraine	3	Both	22	All ages	627	Rheumatoid arthritis	2	Percent	1991	0.000200806	0.000238216	0.000142611
1	Deaths	63	Ukraine	3	Both	22	All ages	627	Rheumatoid arthritis	3	Rate	1991	0.254418	0.301987	0.180556
1	Deaths	63	Ukraine	3	Both	27	Age-standardized	627	Rheumatoid arthritis	3	Rate	1991	0.186828	0.221477	0.134599
1	Deaths	149	Palestine	3	Both	22	All ages	627	Rheumatoid arthritis	1	Number	1994	0.89905	1.22623	0.612549
1	Deaths	149	Palestine	3	Both	22	All ages	627	Rheumatoid arthritis	2	Percent	1994	7.60901e-05	9.83065e-05	5.4035e-05
1	Deaths	149	Palestine	3	Both	22	All ages	627	Rheumatoid arthritis	3	Rate	1994	0.0376108	0.051298	0.0256254
1	Deaths	149	Palestine	3	Both	27	Age-standardized	627	Rheumatoid arthritis	3	Rate	1994	0.0968351	0.130174	0.0654716
1	Deaths	20	Viet Nam	3	Both	22	All ages	627	Rheumatoid arthritis	1	Number	1992	92.5018	129.482	49.3918
1	Deaths	20	Viet Nam	3	Both	22	All ages	627	Rheumatoid arthritis	2	Percent	1992	0.0002143	0.000287144	0.000120428
1	Deaths	20	Viet Nam	3	Both	22	All ages	627	Rheumatoid arthritis	3	Rate	1992	0.130493	0.182662	0.0696776
1	Deaths	20	Viet Nam	3	Both	27	Age-standardized	627	Rheumatoid arthritis	3	Rate	1992	0.254088	0.357638	0.134506
1	Deaths	6	China	3	Both	22	All ages	627	Rheumatoid arthritis	1	Number	1992	4638.99	5918.2	3923.86
1	Deaths	6	China	3	Both	22	All ages	627	Rheumatoid arthritis	2	Percent	1992	0.000540822	0.000676844	0.000467741
1	Deaths	6	China	3	Both	22	All ages	627	Rheumatoid arthritis	3	Rate	1992	0.384583	0.490632	0.325297
1	Deaths	6	China	3	Both	27	Age-standardized	627	Rheumatoid arthritis	3	Rate	1992	0.638985	0.812967	0.537019
1	Deaths	151	Qatar	3	Both	22	All ages	627	Rheumatoid arthritis	1	Number	1992	0.0509085	0.0732638	0.0377956
1	Deaths	151	Qatar	3	Both	22	All ages	627	Rheumatoid arthritis	2	Percent	1992	3.77847e-05	5.16179e-05	2.8242e-05
1	Deaths	151	Qatar	3	Both	22	All ages	627	Rheumatoid arthritis	3	Rate	1992	0.0107643	0.0154912	0.00799164
1	Deaths	151	Qatar	3	Both	27	Age-standardized	627	Rheumatoid arthritis	3	Rate	1992	0.0470352	0.0687384	0.0333121
1	Deaths	53	Serbia	3	Both	22	All ages	627	Rheumatoid arthritis	1	Number	1992	33.6544	46.7207	24.1159
1	Deaths	53	Serbia	3	Both	22	All ages	627	Rheumatoid arthritis	2	Percent	1992	0.000324452	0.000431893	0.000242043
1	Deaths	53	Serbia	3	Both	22	All ages	627	Rheumatoid arthritis	3	Rate	1992	0.347537	0.482469	0.249036
1	Deaths	53	Serbia	3	Both	27	Age-standardized	627	Rheumatoid arthritis	3	Rate	1992	0.331066	0.451367	0.239318
1	Deaths	20	Viet Nam	3	Both	22	All ages	627	Rheumatoid arthritis	1	Number	1994	97.6499	132.974	52.0164
1	Deaths	20	Viet Nam	3	Both	22	All ages	627	Rheumatoid arthritis	2	Percent	1994	0.000226747	0.000298991	0.000124119
1	Deaths	20	Viet Nam	3	Both	22	All ages	627	Rheumatoid arthritis	3	Rate	1994	0.132964	0.181062	0.0708275
1	Deaths	20	Viet Nam	3	Both	27	Age-standardized	627	Rheumatoid arthritis	3	Rate	1994	0.256607	0.351475	0.133405
1	Deaths	109	Cuba	3	Both	22	All ages	627	Rheumatoid arthritis	1	Number	1991	43.9621	48.0123	38.6446
1	Deaths	109	Cuba	3	Both	22	All ages	627	Rheumatoid arthritis	2	Percent	1991	0.000607551	0.000663336	0.000535282
1	Deaths	109	Cuba	3	Both	22	All ages	627	Rheumatoid arthritis	3	Rate	1991	0.402307	0.439372	0.353645
1	Deaths	109	Cuba	3	Both	27	Age-standardized	627	Rheumatoid arthritis	3	Rate	1991	0.444106	0.485193	0.390487
1	Deaths	54	Slovakia	3	Both	22	All ages	627	Rheumatoid arthritis	1	Number	1992	14.6481	17.9876	11.3794
1	Deaths	54	Slovakia	3	Both	22	All ages	627	Rheumatoid arthritis	2	Percent	1992	0.000273206	0.000335622	0.000213055
1	Deaths	54	Slovakia	3	Both	22	All ages	627	Rheumatoid arthritis	3	Rate	1992	0.275276	0.338035	0.213848
1	Deaths	54	Slovakia	3	Both	27	Age-standardized	627	Rheumatoid arthritis	3	Rate	1992	0.241261	0.2947	0.188757
1	Deaths	72	New Zealand	3	Both	22	All ages	627	Rheumatoid arthritis	1	Number	1992	36.9231	40.7572	32.997
1	Deaths	72	New Zealand	3	Both	22	All ages	627	Rheumatoid arthritis	2	Percent	1992	0.00137603	0.00151815	0.00123275
1	Deaths	72	New Zealand	3	Both	22	All ages	627	Rheumatoid arthritis	3	Rate	1992	1.05773	1.16757	0.945263
1	Deaths	72	New Zealand	3	Both	27	Age-standardized	627	Rheumatoid arthritis	3	Rate	1992	0.870762	0.962201	0.777182
1	Deaths	105	Antigua and Barbuda	3	Both	22	All ages	627	Rheumatoid arthritis	1	Number	1990	0.242492	0.286464	0.209089
1	Deaths	105	Antigua and Barbuda	3	Both	22	All ages	627	Rheumatoid arthritis	2	Percent	1990	0.000551894	0.000644317	0.000476378
1	Deaths	105	Antigua and Barbuda	3	Both	22	All ages	627	Rheumatoid arthritis	3	Rate	1990	0.402627	0.475636	0.347164
1	Deaths	105	Antigua and Barbuda	3	Both	27	Age-standardized	627	Rheumatoid arthritis	3	Rate	1990	0.41625	0.487574	0.359965
1	Deaths	142	Iran (Islamic Republic of)	3	Both	22	All ages	627	Rheumatoid arthritis	1	Number	1991	13.1839	18.4499	9.94307
1	Deaths	142	Iran (Islamic Republic of)	3	Both	22	All ages	627	Rheumatoid arthritis	2	Percent	1991	4.60848e-05	6.43257e-05	3.42866e-05
1	Deaths	142	Iran (Islamic Republic of)	3	Both	22	All ages	627	Rheumatoid arthritis	3	Rate	1991	0.0224296	0.0313886	0.016916
1	Deaths	142	Iran (Islamic Republic of)	3	Both	27	Age-standardized	627	Rheumatoid arthritis	3	Rate	1991	0.0507973	0.0717199	0.0354423
1	Deaths	85	Israel	3	Both	22	All ages	627	Rheumatoid arthritis	1	Number	1994	15.6027	17.3523	13.7857
1	Deaths	85	Israel	3	Both	22	All ages	627	Rheumatoid arthritis	2	Percent	1994	0.000462345	0.000512754	0.000409355
1	Deaths	85	Israel	3	Both	22	All ages	627	Rheumatoid arthritis	3	Rate	1994	0.282161	0.313801	0.249302
1	Deaths	85	Israel	3	Both	27	Age-standardized	627	Rheumatoid arthritis	3	Rate	1994	0.277938	0.307625	0.246518
1	Deaths	6	China	3	Both	22	All ages	627	Rheumatoid arthritis	1	Number	1994	4646.36	5795.27	3979.07
1	Deaths	6	China	3	Both	22	All ages	627	Rheumatoid arthritis	2	Percent	1994	0.000540817	0.000684008	0.00046829
1	Deaths	6	China	3	Both	22	All ages	627	Rheumatoid arthritis	3	Rate	1994	0.37889	0.472579	0.324475
1	Deaths	6	China	3	Both	27	Age-standardized	627	Rheumatoid arthritis	3	Rate	1994	0.608525	0.769631	0.521294
1	Deaths	37	Kyrgyzstan	3	Both	22	All ages	627	Rheumatoid arthritis	1	Number	1992	7.58184	9.46815	6.20795
1	Deaths	37	Kyrgyzstan	3	Both	22	All ages	627	Rheumatoid arthritis	2	Percent	1992	0.000206169	0.000256877	0.000171288
1	Deaths	37	Kyrgyzstan	3	Both	22	All ages	627	Rheumatoid arthritis	3	Rate	1992	0.164781	0.205778	0.134922
1	Deaths	37	Kyrgyzstan	3	Both	27	Age-standardized	627	Rheumatoid arthritis	3	Rate	1992	0.277363	0.35617	0.225339
1	Deaths	76	Belgium	3	Both	22	All ages	627	Rheumatoid arthritis	1	Number	1991	74.5445	82.1553	66.791
1	Deaths	76	Belgium	3	Both	22	All ages	627	Rheumatoid arthritis	2	Percent	1991	0.000717318	0.000789251	0.000643441
1	Deaths	76	Belgium	3	Both	22	All ages	627	Rheumatoid arthritis	3	Rate	1991	0.745001	0.821063	0.667512
1	Deaths	76	Belgium	3	Both	27	Age-standardized	627	Rheumatoid arthritis	3	Rate	1991	0.461805	0.507278	0.415032
1	Deaths	12	Lao People's Democratic Republic	3	Both	22	All ages	627	Rheumatoid arthritis	1	Number	1991	6.00865	8.46381	3.45424
1	Deaths	12	Lao People's Democratic Republic	3	Both	22	All ages	627	Rheumatoid arthritis	2	Percent	1991	9.83534e-05	0.000132728	6.05261e-05
1	Deaths	12	Lao People's Democratic Republic	3	Both	22	All ages	627	Rheumatoid arthritis	3	Rate	1991	0.140581	0.198023	0.0808171
1	Deaths	12	Lao People's Democratic Republic	3	Both	27	Age-standardized	627	Rheumatoid arthritis	3	Rate	1991	0.373602	0.522643	0.207885
1	Deaths	78	Denmark	3	Both	22	All ages	627	Rheumatoid arthritis	1	Number	1991	54.8651	61.3797	49.13
1	Deaths	78	Denmark	3	Both	22	All ages	627	Rheumatoid arthritis	2	Percent	1991	0.00091838	0.00102799	0.000823636
1	Deaths	78	Denmark	3	Both	22	All ages	627	Rheumatoid arthritis	3	Rate	1991	1.06435	1.19073	0.953092
1	Deaths	78	Denmark	3	Both	27	Age-standardized	627	Rheumatoid arthritis	3	Rate	1991	0.629776	0.699959	0.56688
1	Deaths	150	Oman	3	Both	22	All ages	627	Rheumatoid arthritis	1	Number	1992	0.279352	0.425969	0.182898
1	Deaths	150	Oman	3	Both	22	All ages	627	Rheumatoid arthritis	2	Percent	1992	3.12734e-05	4.63228e-05	2.21997e-05
1	Deaths	150	Oman	3	Both	22	All ages	627	Rheumatoid arthritis	3	Rate	1992	0.0133989	0.0204313	0.00877256
1	Deaths	150	Oman	3	Both	27	Age-standardized	627	Rheumatoid arthritis	3	Rate	1992	0.0396703	0.0613675	0.0252093
1	Deaths	522	Sudan	3	Both	22	All ages	627	Rheumatoid arthritis	1	Number	1991	8.70066	15.7272	4.62755
1	Deaths	522	Sudan	3	Both	22	All ages	627	Rheumatoid arthritis	2	Percent	1991	3.65065e-05	6.38694e-05	1.9641e-05
1	Deaths	522	Sudan	3	Both	22	All ages	627	Rheumatoid arthritis	3	Rate	1991	0.0417759	0.0755135	0.022219
1	Deaths	522	Sudan	3	Both	27	Age-standardized	627	Rheumatoid arthritis	3	Rate	1991	0.0861911	0.164236	0.0467347
1	Deaths	151	Qatar	3	Both	22	All ages	627	Rheumatoid arthritis	1	Number	1994	0.0531445	0.0749086	0.039376
1	Deaths	151	Qatar	3	Both	22	All ages	627	Rheumatoid arthritis	2	Percent	1994	3.83731e-05	5.27458e-05	2.8682e-05
1	Deaths	151	Qatar	3	Both	22	All ages	627	Rheumatoid arthritis	3	Rate	1994	0.0106362	0.014992	0.00788059
1	Deaths	151	Qatar	3	Both	27	Age-standardized	627	Rheumatoid arthritis	3	Rate	1994	0.0434015	0.0614223	0.0314667
1	Deaths	69	Singapore	3	Both	22	All ages	627	Rheumatoid arthritis	1	Number	1992	3.07087	3.35894	2.77283
1	Deaths	69	Singapore	3	Both	22	All ages	627	Rheumatoid arthritis	2	Percent	1992	0.00021581	0.000235284	0.000194837
1	Deaths	69	Singapore	3	Both	22	All ages	627	Rheumatoid arthritis	3	Rate	1992	0.0950532	0.10397	0.0858279
1	Deaths	69	Singapore	3	Both	27	Age-standardized	627	Rheumatoid arthritis	3	Rate	1992	0.145057	0.15974	0.130454
1	Deaths	22	Fiji	3	Both	22	All ages	627	Rheumatoid arthritis	1	Number	1992	0.00136952	0.00447753	0.000795073
1	Deaths	22	Fiji	3	Both	22	All ages	627	Rheumatoid arthritis	2	Percent	1992	2.88072e-07	9.47185e-07	1.71306e-07
1	Deaths	22	Fiji	3	Both	22	All ages	627	Rheumatoid arthritis	3	Rate	1992	0.000177799	0.000581298	0.000103221
1	Deaths	22	Fiji	3	Both	27	Age-standardized	627	Rheumatoid arthritis	3	Rate	1992	0.000375977	0.00136894	0.000215856
1	Deaths	46	Croatia	3	Both	22	All ages	627	Rheumatoid arthritis	1	Number	1991	26.9092	29.5887	24.4716
1	Deaths	46	Croatia	3	Both	22	All ages	627	Rheumatoid arthritis	2	Percent	1991	0.00047609	0.000523231	0.000435845
1	Deaths	46	Croatia	3	Both	22	All ages	627	Rheumatoid arthritis	3	Rate	1991	0.555932	0.61129	0.505573
1	Deaths	46	Croatia	3	Both	27	Age-standardized	627	Rheumatoid arthritis	3	Rate	1991	0.462059	0.505218	0.421846
1	Deaths	201	Burkina Faso	3	Both	22	All ages	627	Rheumatoid arthritis	1	Number	1990	0.417786	0.90151	0.154842
1	Deaths	201	Burkina Faso	3	Both	22	All ages	627	Rheumatoid arthritis	2	Percent	1990	2.63214e-06	5.63293e-06	9.82226e-07
1	Deaths	201	Burkina Faso	3	Both	22	All ages	627	Rheumatoid arthritis	3	Rate	1990	0.00438477	0.00946158	0.00162511
1	Deaths	201	Burkina Faso	3	Both	27	Age-standardized	627	Rheumatoid arthritis	3	Rate	1990	0.0115893	0.0248101	0.0046106
1	Deaths	6	China	3	Both	22	All ages	627	Rheumatoid arthritis	1	Number	1990	4776.39	5934.4	3902.58
1	Deaths	6	China	3	Both	22	All ages	627	Rheumatoid arthritis	2	Percent	1990	0.000563847	0.000692685	0.000473373
1	Deaths	6	China	3	Both	22	All ages	627	Rheumatoid arthritis	3	Rate	1990	0.405998	0.50443	0.331723
1	Deaths	6	China	3	Both	27	Age-standardized	627	Rheumatoid arthritis	3	Rate	1990	0.69579	0.849076	0.56966
1	Deaths	118	Suriname	3	Both	22	All ages	627	Rheumatoid arthritis	1	Number	1994	0.445524	0.602557	0.318491
1	Deaths	118	Suriname	3	Both	22	All ages	627	Rheumatoid arthritis	2	Percent	1994	0.00016028	0.000214927	0.000115768
1	Deaths	118	Suriname	3	Both	22	All ages	627	Rheumatoid arthritis	3	Rate	1994	0.112889	0.152679	0.0807012
1	Deaths	118	Suriname	3	Both	27	Age-standardized	627	Rheumatoid arthritis	3	Rate	1994	0.187614	0.256938	0.134044
1	Deaths	127	El Salvador	3	Both	22	All ages	627	Rheumatoid arthritis	1	Number	1991	7.75181	10.6738	5.48298
1	Deaths	127	El Salvador	3	Both	22	All ages	627	Rheumatoid arthritis	2	Percent	1991	0.000231344	0.000316855	0.000164096
1	Deaths	127	El Salvador	3	Both	22	All ages	627	Rheumatoid arthritis	3	Rate	1991	0.144432	0.198874	0.102159
1	Deaths	127	El Salvador	3	Both	27	Age-standardized	627	Rheumatoid arthritis	3	Rate	1991	0.261566	0.36157	0.183773
1	Deaths	52	Romania	3	Both	22	All ages	627	Rheumatoid arthritis	1	Number	1990	0.766368	0.945417	0.619943
1	Deaths	52	Romania	3	Both	22	All ages	627	Rheumatoid arthritis	2	Percent	1990	3.08396e-06	3.79619e-06	2.48252e-06
1	Deaths	52	Romania	3	Both	22	All ages	627	Rheumatoid arthritis	3	Rate	1990	0.00327791	0.00404374	0.00265162
1	Deaths	52	Romania	3	Both	27	Age-standardized	627	Rheumatoid arthritis	3	Rate	1990	0.0028141	0.00346464	0.00228625
1	Deaths	102	United States of America	3	Both	22	All ages	627	Rheumatoid arthritis	1	Number	1990	1703.22	1781.52	1558.07
1	Deaths	102	United States of America	3	Both	22	All ages	627	Rheumatoid arthritis	2	Percent	1990	0.000794505	0.000830273	0.000726823
1	Deaths	102	United States of America	3	Both	22	All ages	627	Rheumatoid arthritis	3	Rate	1990	0.67031	0.701126	0.613184
1	Deaths	102	United States of America	3	Both	27	Age-standardized	627	Rheumatoid arthritis	3	Rate	1990	0.50932	0.531805	0.467971
1	Deaths	195	Namibia	3	Both	22	All ages	627	Rheumatoid arthritis	1	Number	1991	3.65592	5.8087	1.80445
1	Deaths	195	Namibia	3	Both	22	All ages	627	Rheumatoid arthritis	2	Percent	1991	0.000308086	0.000489175	0.000147453
1	Deaths	195	Namibia	3	Both	22	All ages	627	Rheumatoid arthritis	3	Rate	1991	0.252353	0.400951	0.124554
1	Deaths	195	Namibia	3	Both	27	Age-standardized	627	Rheumatoid arthritis	3	Rate	1991	0.631851	1.00531	0.295185
1	Deaths	72	New Zealand	3	Both	22	All ages	627	Rheumatoid arthritis	1	Number	1994	37.5083	41.1263	33.5696
1	Deaths	72	New Zealand	3	Both	22	All ages	627	Rheumatoid arthritis	2	Percent	1994	0.00138261	0.00151608	0.00124093
1	Deaths	72	New Zealand	3	Both	22	All ages	627	Rheumatoid arthritis	3	Rate	1994	1.04413	1.14484	0.934486
1	Deaths	72	New Zealand	3	Both	27	Age-standardized	627	Rheumatoid arthritis	3	Rate	1994	0.847653	0.929173	0.757347
1	Deaths	7	Democratic People's Republic of Korea	3	Both	22	All ages	627	Rheumatoid arthritis	1	Number	1994	112.336	153.188	79.9275
1	Deaths	7	Democratic People's Republic of Korea	3	Both	22	All ages	627	Rheumatoid arthritis	2	Percent	1994	0.000703711	0.000875123	0.000543785
1	Deaths	7	Democratic People's Republic of Korea	3	Both	22	All ages	627	Rheumatoid arthritis	3	Rate	1994	0.513419	0.700128	0.3653
1	Deaths	7	Democratic People's Republic of Korea	3	Both	27	Age-standardized	627	Rheumatoid arthritis	3	Rate	1994	0.760608	1.03508	0.544976
1	Deaths	29	Tonga	3	Both	22	All ages	627	Rheumatoid arthritis	1	Number	1991	0.000880244	0.00283277	0.000446562
1	Deaths	29	Tonga	3	Both	22	All ages	627	Rheumatoid arthritis	2	Percent	1991	1.65078e-06	5.44924e-06	8.6924e-07
1	Deaths	29	Tonga	3	Both	22	All ages	627	Rheumatoid arthritis	3	Rate	1991	0.000888695	0.00285997	0.00045085
1	Deaths	29	Tonga	3	Both	27	Age-standardized	627	Rheumatoid arthritis	3	Rate	1991	0.001518	0.00503618	0.000769104
1	Deaths	208	Guinea	3	Both	22	All ages	627	Rheumatoid arthritis	1	Number	1991	0.229687	0.428393	0.0950485
1	Deaths	208	Guinea	3	Both	22	All ages	627	Rheumatoid arthritis	2	Percent	1991	2.14385e-06	4.09975e-06	8.66926e-07
1	Deaths	208	Guinea	3	Both	22	All ages	627	Rheumatoid arthritis	3	Rate	1991	0.0036925	0.00688693	0.00152802
1	Deaths	208	Guinea	3	Both	27	Age-standardized	627	Rheumatoid arthritis	3	Rate	1991	0.00811252	0.0145937	0.00333652
1	Deaths	160	Afghanistan	3	Both	22	All ages	627	Rheumatoid arthritis	1	Number	1991	14.0629	22.7337	6.29642
1	Deaths	160	Afghanistan	3	Both	22	All ages	627	Rheumatoid arthritis	2	Percent	1991	7.98092e-05	0.000128777	3.67652e-05
1	Deaths	160	Afghanistan	3	Both	22	All ages	627	Rheumatoid arthritis	3	Rate	1991	0.141799	0.229229	0.0634882
1	Deaths	160	Afghanistan	3	Both	27	Age-standardized	627	Rheumatoid arthritis	3	Rate	1991	0.203416	0.338053	0.0922634
1	Deaths	144	Jordan	3	Both	22	All ages	627	Rheumatoid arthritis	1	Number	1991	0.616523	0.915057	0.41303
1	Deaths	144	Jordan	3	Both	22	All ages	627	Rheumatoid arthritis	2	Percent	1991	4.22745e-05	5.93146e-05	2.97278e-05
1	Deaths	144	Jordan	3	Both	22	All ages	627	Rheumatoid arthritis	3	Rate	1991	0.0158774	0.0235656	0.0106368
1	Deaths	144	Jordan	3	Both	27	Age-standardized	627	Rheumatoid arthritis	3	Rate	1991	0.0438846	0.0661556	0.0283696
1	Deaths	22	Fiji	3	Both	22	All ages	627	Rheumatoid arthritis	1	Number	1994	0.00145923	0.00477611	0.000880226
1	Deaths	22	Fiji	3	Both	22	All ages	627	Rheumatoid arthritis	2	Percent	1994	2.91701e-07	9.36907e-07	1.77073e-07
1	Deaths	22	Fiji	3	Both	22	All ages	627	Rheumatoid arthritis	3	Rate	1994	0.00018676	0.000611272	0.000112656
1	Deaths	22	Fiji	3	Both	27	Age-standardized	627	Rheumatoid arthritis	3	Rate	1994	0.000386587	0.0013485	0.000221455
1	Deaths	40	Turkmenistan	3	Both	22	All ages	627	Rheumatoid arthritis	1	Number	1992	0.209107	0.243483	0.176734
1	Deaths	40	Turkmenistan	3	Both	22	All ages	627	Rheumatoid arthritis	2	Percent	1992	7.43022e-06	8.754e-06	6.25575e-06
1	Deaths	40	Turkmenistan	3	Both	22	All ages	627	Rheumatoid arthritis	3	Rate	1992	0.00544453	0.00633958	0.00460161
1	Deaths	40	Turkmenistan	3	Both	27	Age-standardized	627	Rheumatoid arthritis	3	Rate	1992	0.0126937	0.0151672	0.0106813
1	Deaths	183	Mauritius	3	Both	22	All ages	627	Rheumatoid arthritis	1	Number	1992	0.4437	0.488241	0.398912
1	Deaths	183	Mauritius	3	Both	22	All ages	627	Rheumatoid arthritis	2	Percent	1992	6.37217e-05	7.03116e-05	5.70464e-05
1	Deaths	183	Mauritius	3	Both	22	All ages	627	Rheumatoid arthritis	3	Rate	1992	0.0395655	0.0435373	0.0355717
1	Deaths	183	Mauritius	3	Both	27	Age-standardized	627	Rheumatoid arthritis	3	Rate	1992	0.0686373	0.0757874	0.0614085
1	Deaths	7	Democratic People's Republic of Korea	3	Both	22	All ages	627	Rheumatoid arthritis	1	Number	1990	97.7563	137.937	66.9313
1	Deaths	7	Democratic People's Republic of Korea	3	Both	22	All ages	627	Rheumatoid arthritis	2	Percent	1990	0.000674331	0.000863863	0.000518758
1	Deaths	7	Democratic People's Republic of Korea	3	Both	22	All ages	627	Rheumatoid arthritis	3	Rate	1990	0.474742	0.669875	0.325044
1	Deaths	7	Democratic People's Republic of Korea	3	Both	27	Age-standardized	627	Rheumatoid arthritis	3	Rate	1990	0.742692	1.03103	0.514478
1	Deaths	150	Oman	3	Both	22	All ages	627	Rheumatoid arthritis	1	Number	1994	0.290504	0.430371	0.192832
1	Deaths	150	Oman	3	Both	22	All ages	627	Rheumatoid arthritis	2	Percent	1994	3.31465e-05	4.77705e-05	2.37497e-05
1	Deaths	150	Oman	3	Both	22	All ages	627	Rheumatoid arthritis	3	Rate	1994	0.0133902	0.019837	0.0088882
1	Deaths	150	Oman	3	Both	27	Age-standardized	627	Rheumatoid arthritis	3	Rate	1994	0.0392333	0.0591945	0.0250826
1	Deaths	25	Micronesia (Federated States of)	3	Both	22	All ages	627	Rheumatoid arthritis	1	Number	1990	0.00101526	0.00292839	0.000486094
1	Deaths	25	Micronesia (Federated States of)	3	Both	22	All ages	627	Rheumatoid arthritis	2	Percent	1990	1.25523e-06	3.58538e-06	6.3267e-07
1	Deaths	25	Micronesia (Federated States of)	3	Both	22	All ages	627	Rheumatoid arthritis	3	Rate	1990	0.0009811	0.00282987	0.00046974
1	Deaths	25	Micronesia (Federated States of)	3	Both	27	Age-standardized	627	Rheumatoid arthritis	3	Rate	1990	0.00203765	0.00604474	0.000978776
1	Deaths	217	Sierra Leone	3	Both	22	All ages	627	Rheumatoid arthritis	1	Number	1990	0.139502	0.267344	0.0626292
1	Deaths	217	Sierra Leone	3	Both	22	All ages	627	Rheumatoid arthritis	2	Percent	1990	1.87952e-06	3.50595e-06	8.37017e-07
1	Deaths	217	Sierra Leone	3	Both	22	All ages	627	Rheumatoid arthritis	3	Rate	1990	0.00336016	0.00643943	0.00150853
1	Deaths	217	Sierra Leone	3	Both	27	Age-standardized	627	Rheumatoid arthritis	3	Rate	1990	0.0074245	0.0137735	0.00342721
1	Deaths	367	Monaco	3	Both	22	All ages	627	Rheumatoid arthritis	1	Number	1992	0.0206443	0.0298913	0.0131238
1	Deaths	367	Monaco	3	Both	22	All ages	627	Rheumatoid arthritis	2	Percent	1992	4.63186e-05	6.42038e-05	3.23197e-05
1	Deaths	367	Monaco	3	Both	22	All ages	627	Rheumatoid arthritis	3	Rate	1992	0.0665629	0.0963776	0.0423149
1	Deaths	367	Monaco	3	Both	27	Age-standardized	627	Rheumatoid arthritis	3	Rate	1992	0.0253258	0.0360222	0.0163022
1	Deaths	184	Mozambique	3	Both	22	All ages	627	Rheumatoid arthritis	1	Number	1992	2.18053	19.9856	0.616655
1	Deaths	184	Mozambique	3	Both	22	All ages	627	Rheumatoid arthritis	2	Percent	1992	1.02058e-05	9.59152e-05	2.88241e-06
1	Deaths	184	Mozambique	3	Both	22	All ages	627	Rheumatoid arthritis	3	Rate	1992	0.0160733	0.147319	0.00454553
1	Deaths	184	Mozambique	3	Both	27	Age-standardized	627	Rheumatoid arthritis	3	Rate	1992	0.0423035	0.371256	0.0121408
1	Deaths	71	Australia	3	Both	22	All ages	627	Rheumatoid arthritis	1	Number	1992	186.804	202.41	168.409
1	Deaths	71	Australia	3	Both	22	All ages	627	Rheumatoid arthritis	2	Percent	1992	0.00154456	0.00167296	0.00138845
1	Deaths	71	Australia	3	Both	22	All ages	627	Rheumatoid arthritis	3	Rate	1992	1.07957	1.16976	0.973263
1	Deaths	71	Australia	3	Both	27	Age-standardized	627	Rheumatoid arthritis	3	Rate	1992	0.887843	0.963017	0.79732
1	Deaths	201	Burkina Faso	3	Both	22	All ages	627	Rheumatoid arthritis	1	Number	1992	0.425509	0.911071	0.169867
1	Deaths	201	Burkina Faso	3	Both	22	All ages	627	Rheumatoid arthritis	2	Percent	1992	2.57666e-06	5.40471e-06	1.03035e-06
1	Deaths	201	Burkina Faso	3	Both	22	All ages	627	Rheumatoid arthritis	3	Rate	1992	0.00425554	0.00911167	0.00169885
1	Deaths	201	Burkina Faso	3	Both	27	Age-standardized	627	Rheumatoid arthritis	3	Rate	1992	0.0111731	0.0232514	0.00478002
1	Deaths	94	Switzerland	3	Both	22	All ages	627	Rheumatoid arthritis	1	Number	1991	72.22	80.9128	62.5935
1	Deaths	94	Switzerland	3	Both	22	All ages	627	Rheumatoid arthritis	2	Percent	1991	0.00115183	0.00128727	0.000998635
1	Deaths	94	Switzerland	3	Both	22	All ages	627	Rheumatoid arthritis	3	Rate	1991	1.0438	1.16944	0.904671
1	Deaths	94	Switzerland	3	Both	27	Age-standardized	627	Rheumatoid arthritis	3	Rate	1991	0.620762	0.691572	0.543367
1	Deaths	369	Nauru	3	Both	22	All ages	627	Rheumatoid arthritis	1	Number	1992	8.70291e-05	0.000206437	4.82183e-05
1	Deaths	369	Nauru	3	Both	22	All ages	627	Rheumatoid arthritis	2	Percent	1992	9.69964e-07	2.32439e-06	5.54883e-07
1	Deaths	369	Nauru	3	Both	22	All ages	627	Rheumatoid arthritis	3	Rate	1992	0.000841505	0.00199609	0.000466234
1	Deaths	369	Nauru	3	Both	27	Age-standardized	627	Rheumatoid arthritis	3	Rate	1992	0.00172488	0.00455515	0.00096132
1	Deaths	37	Kyrgyzstan	3	Both	22	All ages	627	Rheumatoid arthritis	1	Number	1990	6.75265	8.85859	5.40114
1	Deaths	37	Kyrgyzstan	3	Both	22	All ages	627	Rheumatoid arthritis	2	Percent	1990	0.00019117	0.000248804	0.000155166
1	Deaths	37	Kyrgyzstan	3	Both	22	All ages	627	Rheumatoid arthritis	3	Rate	1990	0.151272	0.198449	0.120996
1	Deaths	37	Kyrgyzstan	3	Both	27	Age-standardized	627	Rheumatoid arthritis	3	Rate	1990	0.255405	0.344395	0.204062
1	Deaths	136	Paraguay	3	Both	22	All ages	627	Rheumatoid arthritis	1	Number	1992	8.66179	11.3704	6.69661
1	Deaths	136	Paraguay	3	Both	22	All ages	627	Rheumatoid arthritis	2	Percent	1992	0.000484575	0.000615367	0.000381871
1	Deaths	136	Paraguay	3	Both	22	All ages	627	Rheumatoid arthritis	3	Rate	1992	0.20244	0.265744	0.15651
1	Deaths	136	Paraguay	3	Both	27	Age-standardized	627	Rheumatoid arthritis	3	Rate	1992	0.353997	0.468019	0.271935
1	Deaths	162	Bhutan	3	Both	22	All ages	627	Rheumatoid arthritis	1	Number	1991	1.72187	2.46302	0.90257
1	Deaths	162	Bhutan	3	Both	22	All ages	627	Rheumatoid arthritis	2	Percent	1991	0.0003099	0.000434914	0.000166952
1	Deaths	162	Bhutan	3	Both	22	All ages	627	Rheumatoid arthritis	3	Rate	1991	0.266005	0.380503	0.139435
1	Deaths	162	Bhutan	3	Both	27	Age-standardized	627	Rheumatoid arthritis	3	Rate	1991	0.999813	1.43697	0.543058
1	Deaths	111	Dominican Republic	3	Both	22	All ages	627	Rheumatoid arthritis	1	Number	1991	18.404	25.0864	11.5314
1	Deaths	111	Dominican Republic	3	Both	22	All ages	627	Rheumatoid arthritis	2	Percent	1991	0.000480256	0.000648128	0.000304544
1	Deaths	111	Dominican Republic	3	Both	22	All ages	627	Rheumatoid arthritis	3	Rate	1991	0.25225	0.343842	0.158052
1	Deaths	111	Dominican Republic	3	Both	27	Age-standardized	627	Rheumatoid arthritis	3	Rate	1991	0.71243	0.994652	0.435966
1	Deaths	171	Democratic Republic of the Congo	3	Both	22	All ages	627	Rheumatoid arthritis	1	Number	1992	8.99765	92.1746	2.52617
1	Deaths	171	Democratic Republic of the Congo	3	Both	22	All ages	627	Rheumatoid arthritis	2	Percent	1992	1.65683e-05	0.000171675	4.68817e-06
1	Deaths	171	Democratic Republic of the Congo	3	Both	22	All ages	627	Rheumatoid arthritis	3	Rate	1992	0.0223228	0.228681	0.00626731
1	Deaths	171	Democratic Republic of the Congo	3	Both	27	Age-standardized	627	Rheumatoid arthritis	3	Rate	1992	0.0642775	0.653983	0.0174797
1	Deaths	20	Viet Nam	3	Both	22	All ages	627	Rheumatoid arthritis	1	Number	1990	88.188	125.624	46.9795
1	Deaths	20	Viet Nam	3	Both	22	All ages	627	Rheumatoid arthritis	2	Percent	1990	0.000203409	0.000278792	0.000115422
1	Deaths	20	Viet Nam	3	Both	22	All ages	627	Rheumatoid arthritis	3	Rate	1990	0.129257	0.184128	0.0688578
1	Deaths	20	Viet Nam	3	Both	27	Age-standardized	627	Rheumatoid arthritis	3	Rate	1990	0.252607	0.361346	0.133915
1	Deaths	8	Taiwan (Province of China)	3	Both	22	All ages	627	Rheumatoid arthritis	1	Number	1992	58.564	62.0846	54.8536
1	Deaths	8	Taiwan (Province of China)	3	Both	22	All ages	627	Rheumatoid arthritis	2	Percent	1992	0.000545103	0.000578842	0.00051107
1	Deaths	8	Taiwan (Province of China)	3	Both	22	All ages	627	Rheumatoid arthritis	3	Rate	1992	0.281649	0.29858	0.263804
1	Deaths	8	Taiwan (Province of China)	3	Both	27	Age-standardized	627	Rheumatoid arthritis	3	Rate	1992	0.403667	0.429292	0.374376
1	Deaths	205	C么te d'Ivoire	3	Both	22	All ages	627	Rheumatoid arthritis	1	Number	1990	0.165065	0.317099	0.0712949
1	Deaths	205	C么te d'Ivoire	3	Both	22	All ages	627	Rheumatoid arthritis	2	Percent	1990	1.16378e-06	2.25037e-06	5.09664e-07
1	Deaths	205	C么te d'Ivoire	3	Both	22	All ages	627	Rheumatoid arthritis	3	Rate	1990	0.0013532	0.00259957	0.000584474
1	Deaths	205	C么te d'Ivoire	3	Both	27	Age-standardized	627	Rheumatoid arthritis	3	Rate	1990	0.0077839	0.0146326	0.00344526
1	Deaths	153	Syrian Arab Republic	3	Both	22	All ages	627	Rheumatoid arthritis	1	Number	1992	4.56756	5.98215	3.22624
1	Deaths	153	Syrian Arab Republic	3	Both	22	All ages	627	Rheumatoid arthritis	2	Percent	1992	6.40682e-05	8.02596e-05	4.72899e-05
1	Deaths	153	Syrian Arab Republic	3	Both	22	All ages	627	Rheumatoid arthritis	3	Rate	1992	0.0337451	0.044196	0.0238354
1	Deaths	153	Syrian Arab Republic	3	Both	27	Age-standardized	627	Rheumatoid arthritis	3	Rate	1992	0.0764771	0.10132	0.0522054
1	Deaths	38	Mongolia	3	Both	22	All ages	627	Rheumatoid arthritis	1	Number	1992	1.98881	6.08871	1.15727
1	Deaths	38	Mongolia	3	Both	22	All ages	627	Rheumatoid arthritis	2	Percent	1992	0.000103097	0.000312876	5.90905e-05
1	Deaths	38	Mongolia	3	Both	22	All ages	627	Rheumatoid arthritis	3	Rate	1992	0.0889203	0.272228	0.0517419
1	Deaths	38	Mongolia	3	Both	27	Age-standardized	627	Rheumatoid arthritis	3	Rate	1992	0.221766	0.684665	0.125964
1	Deaths	205	C么te d'Ivoire	3	Both	22	All ages	627	Rheumatoid arthritis	1	Number	1992	0.178014	0.338026	0.0844835
1	Deaths	205	C么te d'Ivoire	3	Both	22	All ages	627	Rheumatoid arthritis	2	Percent	1992	1.12248e-06	2.11949e-06	5.31119e-07
1	Deaths	205	C么te d'Ivoire	3	Both	22	All ages	627	Rheumatoid arthritis	3	Rate	1992	0.00135338	0.0025699	0.000642298
1	Deaths	205	C么te d'Ivoire	3	Both	27	Age-standardized	627	Rheumatoid arthritis	3	Rate	1992	0.0075722	0.013949	0.00357807
1	Deaths	218	Togo	3	Both	22	All ages	627	Rheumatoid arthritis	1	Number	1992	0.0659524	0.127786	0.030122
1	Deaths	218	Togo	3	Both	22	All ages	627	Rheumatoid arthritis	2	Percent	1992	1.62491e-06	3.03097e-06	7.64311e-07
1	Deaths	218	Togo	3	Both	22	All ages	627	Rheumatoid arthritis	3	Rate	1992	0.0017033	0.00330023	0.000777937
1	Deaths	218	Togo	3	Both	27	Age-standardized	627	Rheumatoid arthritis	3	Rate	1992	0.00724122	0.0136247	0.00328961
1	Deaths	82	Greece	3	Both	22	All ages	627	Rheumatoid arthritis	1	Number	1991	25.7177	27.7759	23.4787
1	Deaths	82	Greece	3	Both	22	All ages	627	Rheumatoid arthritis	2	Percent	1991	0.00026995	0.000291565	0.000246397
1	Deaths	82	Greece	3	Both	22	All ages	627	Rheumatoid arthritis	3	Rate	1991	0.245855	0.265532	0.224451
1	Deaths	82	Greece	3	Both	27	Age-standardized	627	Rheumatoid arthritis	3	Rate	1991	0.165192	0.178268	0.150367
1	Deaths	7	Democratic People's Republic of Korea	3	Both	22	All ages	627	Rheumatoid arthritis	1	Number	1992	104.434	146.119	71.9793
1	Deaths	7	Democratic People's Republic of Korea	3	Both	22	All ages	627	Rheumatoid arthritis	2	Percent	1992	0.000687862	0.000869275	0.000530156
1	Deaths	7	Democratic People's Republic of Korea	3	Both	22	All ages	627	Rheumatoid arthritis	3	Rate	1992	0.492048	0.688449	0.339136
1	Deaths	7	Democratic People's Republic of Korea	3	Both	27	Age-standardized	627	Rheumatoid arthritis	3	Rate	1992	0.749625	1.0348	0.526085
1	Deaths	151	Qatar	3	Both	22	All ages	627	Rheumatoid arthritis	1	Number	1990	0.0478316	0.0700972	0.0343596
1	Deaths	151	Qatar	3	Both	22	All ages	627	Rheumatoid arthritis	2	Percent	1990	3.79597e-05	5.54562e-05	2.81194e-05
1	Deaths	151	Qatar	3	Both	22	All ages	627	Rheumatoid arthritis	3	Rate	1990	0.0107526	0.0157579	0.00772406
1	Deaths	151	Qatar	3	Both	27	Age-standardized	627	Rheumatoid arthritis	3	Rate	1990	0.0501166	0.0744706	0.034518
1	Deaths	118	Suriname	3	Both	22	All ages	627	Rheumatoid arthritis	1	Number	1990	0.394898	0.535336	0.275342
1	Deaths	118	Suriname	3	Both	22	All ages	627	Rheumatoid arthritis	2	Percent	1990	0.000149983	0.000202295	0.000102896
1	Deaths	118	Suriname	3	Both	22	All ages	627	Rheumatoid arthritis	3	Rate	1990	0.102116	0.138431	0.0712001
1	Deaths	118	Suriname	3	Both	27	Age-standardized	627	Rheumatoid arthritis	3	Rate	1990	0.17121	0.234562	0.118777
1	Deaths	171	Democratic Republic of the Congo	3	Both	22	All ages	627	Rheumatoid arthritis	1	Number	1990	8.39058	83.5166	2.35182
1	Deaths	171	Democratic Republic of the Congo	3	Both	22	All ages	627	Rheumatoid arthritis	2	Percent	1990	1.62994e-05	0.000169138	4.64694e-06
1	Deaths	171	Democratic Republic of the Congo	3	Both	22	All ages	627	Rheumatoid arthritis	3	Rate	1990	0.021995	0.21893	0.00616505
1	Deaths	171	Democratic Republic of the Congo	3	Both	27	Age-standardized	627	Rheumatoid arthritis	3	Rate	1990	0.0638901	0.622818	0.0176657
1	Deaths	216	Senegal	3	Both	22	All ages	627	Rheumatoid arthritis	1	Number	1992	0.237591	0.465522	0.0964547
1	Deaths	216	Senegal	3	Both	22	All ages	627	Rheumatoid arthritis	2	Percent	1992	2.69276e-06	5.27505e-06	1.08938e-06
1	Deaths	216	Senegal	3	Both	22	All ages	627	Rheumatoid arthritis	3	Rate	1992	0.00294776	0.00577567	0.0011967
1	Deaths	216	Senegal	3	Both	27	Age-standardized	627	Rheumatoid arthritis	3	Rate	1992	0.00874639	0.0167963	0.00374142
1	Deaths	53	Serbia	3	Both	22	All ages	627	Rheumatoid arthritis	1	Number	1994	36.0832	47.7132	26.664
1	Deaths	53	Serbia	3	Both	22	All ages	627	Rheumatoid arthritis	2	Percent	1994	0.000327232	0.000427523	0.000247276
1	Deaths	53	Serbia	3	Both	22	All ages	627	Rheumatoid arthritis	3	Rate	1994	0.361733	0.478323	0.267305
1	Deaths	53	Serbia	3	Both	27	Age-standardized	627	Rheumatoid arthritis	3	Rate	1994	0.345769	0.451637	0.25745
1	Deaths	71	Australia	3	Both	22	All ages	627	Rheumatoid arthritis	1	Number	1994	192.47	210.645	170.77
1	Deaths	71	Australia	3	Both	22	All ages	627	Rheumatoid arthritis	2	Percent	1994	0.00154255	0.00168737	0.00137007
1	Deaths	71	Australia	3	Both	22	All ages	627	Rheumatoid arthritis	3	Rate	1994	1.08741	1.19009	0.964808
1	Deaths	71	Australia	3	Both	27	Age-standardized	627	Rheumatoid arthritis	3	Rate	1994	0.866836	0.948255	0.76913
1	Deaths	369	Nauru	3	Both	22	All ages	627	Rheumatoid arthritis	1	Number	1990	8.17795e-05	0.000195392	4.52698e-05
1	Deaths	369	Nauru	3	Both	22	All ages	627	Rheumatoid arthritis	2	Percent	1990	9.5179e-07	2.27919e-06	5.56785e-07
1	Deaths	369	Nauru	3	Both	22	All ages	627	Rheumatoid arthritis	3	Rate	1990	0.000801349	0.00191463	0.000443594
1	Deaths	369	Nauru	3	Both	27	Age-standardized	627	Rheumatoid arthritis	3	Rate	1990	0.00164508	0.00431629	0.000909074
1	Deaths	58	Estonia	3	Both	22	All ages	627	Rheumatoid arthritis	1	Number	1994	18.9176	20.6373	17.1967
1	Deaths	58	Estonia	3	Both	22	All ages	627	Rheumatoid arthritis	2	Percent	1994	0.000840987	0.000911876	0.000771142
1	Deaths	58	Estonia	3	Both	22	All ages	627	Rheumatoid arthritis	3	Rate	1994	1.27746	1.39359	1.16125
1	Deaths	58	Estonia	3	Both	27	Age-standardized	627	Rheumatoid arthritis	3	Rate	1994	0.930423	1.01294	0.847214
1	Deaths	8	Taiwan (Province of China)	3	Both	22	All ages	627	Rheumatoid arthritis	1	Number	1994	54.5654	57.9876	50.6403
1	Deaths	8	Taiwan (Province of China)	3	Both	22	All ages	627	Rheumatoid arthritis	2	Percent	1994	0.000483159	0.000512773	0.00044957
1	Deaths	8	Taiwan (Province of China)	3	Both	22	All ages	627	Rheumatoid arthritis	3	Rate	1994	0.257484	0.273633	0.238962
1	Deaths	8	Taiwan (Province of China)	3	Both	27	Age-standardized	627	Rheumatoid arthritis	3	Rate	1994	0.345775	0.369614	0.319414
1	Deaths	129	Honduras	3	Both	22	All ages	627	Rheumatoid arthritis	1	Number	1991	24.9744	39.0068	15.4519
1	Deaths	129	Honduras	3	Both	22	All ages	627	Rheumatoid arthritis	2	Percent	1991	0.000905835	0.00138128	0.000557784
1	Deaths	129	Honduras	3	Both	22	All ages	627	Rheumatoid arthritis	3	Rate	1991	0.515204	0.804682	0.318761
1	Deaths	129	Honduras	3	Both	27	Age-standardized	627	Rheumatoid arthritis	3	Rate	1991	1.3498	2.23131	0.78514
1	Deaths	194	Lesotho	3	Both	22	All ages	627	Rheumatoid arthritis	1	Number	1991	4.51456	6.48892	2.03406
1	Deaths	194	Lesotho	3	Both	22	All ages	627	Rheumatoid arthritis	2	Percent	1991	0.000297496	0.000407954	0.000139725
1	Deaths	194	Lesotho	3	Both	22	All ages	627	Rheumatoid arthritis	3	Rate	1991	0.290359	0.417342	0.130822
1	Deaths	194	Lesotho	3	Both	27	Age-standardized	627	Rheumatoid arthritis	3	Rate	1991	0.573215	0.823694	0.245707
1	Deaths	91	Portugal	3	Both	22	All ages	627	Rheumatoid arthritis	1	Number	1992	66.468	71.7788	59.7146
1	Deaths	91	Portugal	3	Both	22	All ages	627	Rheumatoid arthritis	2	Percent	1992	0.000650763	0.000703246	0.000585827
1	Deaths	91	Portugal	3	Both	22	All ages	627	Rheumatoid arthritis	3	Rate	1992	0.65474	0.707053	0.588216
1	Deaths	91	Portugal	3	Both	27	Age-standardized	627	Rheumatoid arthritis	3	Rate	1992	0.4724	0.509056	0.427166
1	Deaths	38	Mongolia	3	Both	22	All ages	627	Rheumatoid arthritis	1	Number	1994	1.96347	5.79729	1.14857
1	Deaths	38	Mongolia	3	Both	22	All ages	627	Rheumatoid arthritis	2	Percent	1994	0.000105054	0.000310782	6.12841e-05
1	Deaths	38	Mongolia	3	Both	22	All ages	627	Rheumatoid arthritis	3	Rate	1994	0.085282	0.251801	0.0498875
1	Deaths	38	Mongolia	3	Both	27	Age-standardized	627	Rheumatoid arthritis	3	Rate	1994	0.210492	0.611748	0.117705
1	Deaths	202	Cameroon	3	Both	22	All ages	627	Rheumatoid arthritis	1	Number	1992	0.337496	0.64812	0.133356
1	Deaths	202	Cameroon	3	Both	22	All ages	627	Rheumatoid arthritis	2	Percent	1992	2.64232e-06	5.10579e-06	1.04318e-06
1	Deaths	202	Cameroon	3	Both	22	All ages	627	Rheumatoid arthritis	3	Rate	1992	0.00301668	0.00579317	0.00119199
1	Deaths	202	Cameroon	3	Both	27	Age-standardized	627	Rheumatoid arthritis	3	Rate	1992	0.0101754	0.0188782	0.00419371
1	Deaths	26	Papua New Guinea	3	Both	22	All ages	627	Rheumatoid arthritis	1	Number	1990	0.0252508	0.0803564	0.0102493
1	Deaths	26	Papua New Guinea	3	Both	22	All ages	627	Rheumatoid arthritis	2	Percent	1990	7.439e-07	2.39448e-06	3.27844e-07
1	Deaths	26	Papua New Guinea	3	Both	22	All ages	627	Rheumatoid arthritis	3	Rate	1990	0.000615399	0.0019584	0.000249791
1	Deaths	26	Papua New Guinea	3	Both	27	Age-standardized	627	Rheumatoid arthritis	3	Rate	1990	0.00127793	0.0047073	0.00050662
1	Deaths	49	North Macedonia	3	Both	22	All ages	627	Rheumatoid arthritis	1	Number	1991	1.42381	1.91415	1.02695
1	Deaths	49	North Macedonia	3	Both	22	All ages	627	Rheumatoid arthritis	2	Percent	1991	8.39352e-05	0.00011175	6.04816e-05
1	Deaths	49	North Macedonia	3	Both	22	All ages	627	Rheumatoid arthritis	3	Rate	1991	0.0714474	0.0960526	0.0515325
1	Deaths	49	North Macedonia	3	Both	27	Age-standardized	627	Rheumatoid arthritis	3	Rate	1991	0.0806799	0.108236	0.0580187
1	Deaths	203	Cabo Verde	3	Both	22	All ages	627	Rheumatoid arthritis	1	Number	1992	0.0147878	0.0311121	0.00418671
1	Deaths	203	Cabo Verde	3	Both	22	All ages	627	Rheumatoid arthritis	2	Percent	1992	5.62216e-06	1.16632e-05	1.60993e-06
1	Deaths	203	Cabo Verde	3	Both	22	All ages	627	Rheumatoid arthritis	3	Rate	1992	0.003976	0.00836512	0.00112568
1	Deaths	203	Cabo Verde	3	Both	27	Age-standardized	627	Rheumatoid arthritis	3	Rate	1992	0.0055514	0.0116746	0.00158252
1	Deaths	135	Brazil	3	Both	22	All ages	627	Rheumatoid arthritis	1	Number	1994	249.241	262.254	234.964
1	Deaths	135	Brazil	3	Both	22	All ages	627	Rheumatoid arthritis	2	Percent	1994	0.000268475	0.000282924	0.000252234
1	Deaths	135	Brazil	3	Both	22	All ages	627	Rheumatoid arthritis	3	Rate	1994	0.157386	0.165603	0.14837
1	Deaths	135	Brazil	3	Both	27	Age-standardized	627	Rheumatoid arthritis	3	Rate	1994	0.252514	0.267225	0.235312
1	Deaths	13	Malaysia	3	Both	22	All ages	627	Rheumatoid arthritis	1	Number	1991	6.92556	9.05539	5.16639
1	Deaths	13	Malaysia	3	Both	22	All ages	627	Rheumatoid arthritis	2	Percent	1991	8.29762e-05	0.000108633	6.18006e-05
1	Deaths	13	Malaysia	3	Both	22	All ages	627	Rheumatoid arthritis	3	Rate	1991	0.0380568	0.0497604	0.0283899
1	Deaths	13	Malaysia	3	Both	27	Age-standardized	627	Rheumatoid arthritis	3	Rate	1991	0.0832643	0.111662	0.0602741
1	Deaths	62	Russian Federation	3	Both	22	All ages	627	Rheumatoid arthritis	1	Number	1991	778.684	798.945	754.78
1	Deaths	62	Russian Federation	3	Both	22	All ages	627	Rheumatoid arthritis	2	Percent	1991	0.000467112	0.000478992	0.000452846
1	Deaths	62	Russian Federation	3	Both	22	All ages	627	Rheumatoid arthritis	3	Rate	1991	0.51408	0.527456	0.498299
1	Deaths	62	Russian Federation	3	Both	27	Age-standardized	627	Rheumatoid arthritis	3	Rate	1991	0.422838	0.433474	0.409462
1	Deaths	170	Congo	3	Both	22	All ages	627	Rheumatoid arthritis	1	Number	1992	0.777818	7.47103	0.268805
1	Deaths	170	Congo	3	Both	22	All ages	627	Rheumatoid arthritis	2	Percent	1992	2.49015e-05	0.000246595	8.81697e-06
1	Deaths	170	Congo	3	Both	22	All ages	627	Rheumatoid arthritis	3	Rate	1992	0.0305637	0.293568	0.0105625
1	Deaths	170	Congo	3	Both	27	Age-standardized	627	Rheumatoid arthritis	3	Rate	1992	0.0826242	0.810634	0.0278854
1	Deaths	186	Seychelles	3	Both	22	All ages	627	Rheumatoid arthritis	1	Number	1992	0.0227599	0.0299892	0.0165101
1	Deaths	186	Seychelles	3	Both	22	All ages	627	Rheumatoid arthritis	2	Percent	1992	4.07617e-05	5.34991e-05	2.96169e-05
1	Deaths	186	Seychelles	3	Both	22	All ages	627	Rheumatoid arthritis	3	Rate	1992	0.0305821	0.040296	0.0221844
1	Deaths	186	Seychelles	3	Both	27	Age-standardized	627	Rheumatoid arthritis	3	Rate	1992	0.0392936	0.0516776	0.0285342
1	Deaths	71	Australia	3	Both	22	All ages	627	Rheumatoid arthritis	1	Number	1990	182.429	197.222	165.114
1	Deaths	71	Australia	3	Both	22	All ages	627	Rheumatoid arthritis	2	Percent	1990	0.00152739	0.00165073	0.00138226
1	Deaths	71	Australia	3	Both	22	All ages	627	Rheumatoid arthritis	3	Rate	1990	1.08209	1.16983	0.979383
1	Deaths	71	Australia	3	Both	27	Age-standardized	627	Rheumatoid arthritis	3	Rate	1990	0.923295	0.997963	0.831742
1	Deaths	396	San Marino	3	Both	22	All ages	627	Rheumatoid arthritis	1	Number	1991	0.0672059	0.0886232	0.0508543
1	Deaths	396	San Marino	3	Both	22	All ages	627	Rheumatoid arthritis	2	Percent	1991	0.000346973	0.000455571	0.000271081
1	Deaths	396	San Marino	3	Both	22	All ages	627	Rheumatoid arthritis	3	Rate	1991	0.27887	0.367741	0.21102
1	Deaths	396	San Marino	3	Both	27	Age-standardized	627	Rheumatoid arthritis	3	Rate	1991	0.171259	0.224831	0.129688
1	Deaths	79	Finland	3	Both	22	All ages	627	Rheumatoid arthritis	1	Number	1991	132.89	143.753	117.305
1	Deaths	79	Finland	3	Both	22	All ages	627	Rheumatoid arthritis	2	Percent	1991	0.00269165	0.002916	0.00238267
1	Deaths	79	Finland	3	Both	22	All ages	627	Rheumatoid arthritis	3	Rate	1991	2.64009	2.85589	2.33046
1	Deaths	79	Finland	3	Both	27	Age-standardized	627	Rheumatoid arthritis	3	Rate	1991	1.78864	1.93501	1.57432
1	Deaths	185	Rwanda	3	Both	22	All ages	627	Rheumatoid arthritis	1	Number	1990	1.30972	11.9348	0.438653
1	Deaths	185	Rwanda	3	Both	22	All ages	627	Rheumatoid arthritis	2	Percent	1990	1.19105e-05	0.000107725	4.05508e-06
1	Deaths	185	Rwanda	3	Both	22	All ages	627	Rheumatoid arthritis	3	Rate	1990	0.0182174	0.166006	0.00610139
1	Deaths	185	Rwanda	3	Both	27	Age-standardized	627	Rheumatoid arthritis	3	Rate	1990	0.0544059	0.499138	0.0176662
1	Deaths	39	Tajikistan	3	Both	22	All ages	627	Rheumatoid arthritis	1	Number	1994	1.12044	2.04223	0.700777
1	Deaths	39	Tajikistan	3	Both	22	All ages	627	Rheumatoid arthritis	2	Percent	1994	2.36239e-05	4.34133e-05	1.48473e-05
1	Deaths	39	Tajikistan	3	Both	22	All ages	627	Rheumatoid arthritis	3	Rate	1994	0.0193997	0.0353599	0.0121335
1	Deaths	39	Tajikistan	3	Both	27	Age-standardized	627	Rheumatoid arthritis	3	Rate	1994	0.0438907	0.0813814	0.027292
1	Deaths	305	Bermuda	3	Both	22	All ages	627	Rheumatoid arthritis	1	Number	1991	0.240542	0.27722	0.209229
1	Deaths	305	Bermuda	3	Both	22	All ages	627	Rheumatoid arthritis	2	Percent	1991	0.00049225	0.000560719	0.000430556
1	Deaths	305	Bermuda	3	Both	22	All ages	627	Rheumatoid arthritis	3	Rate	1991	0.402006	0.463304	0.349674
1	Deaths	305	Bermuda	3	Both	27	Age-standardized	627	Rheumatoid arthritis	3	Rate	1991	0.453129	0.516979	0.392306
1	Deaths	168	Angola	3	Both	22	All ages	627	Rheumatoid arthritis	1	Number	1992	2.16502	22.4076	0.595687
1	Deaths	168	Angola	3	Both	22	All ages	627	Rheumatoid arthritis	2	Percent	1992	1.22202e-05	0.000127887	3.57593e-06
1	Deaths	168	Angola	3	Both	22	All ages	627	Rheumatoid arthritis	3	Rate	1992	0.019655	0.203426	0.00540792
1	Deaths	168	Angola	3	Both	27	Age-standardized	627	Rheumatoid arthritis	3	Rate	1992	0.0643872	0.630418	0.0178583
1	Deaths	168	Angola	3	Both	22	All ages	627	Rheumatoid arthritis	1	Number	1994	2.31215	24.0984	0.63705
1	Deaths	168	Angola	3	Both	22	All ages	627	Rheumatoid arthritis	2	Percent	1994	1.2361e-05	0.00013263	3.56801e-06
1	Deaths	168	Angola	3	Both	22	All ages	627	Rheumatoid arthritis	3	Rate	1994	0.0195722	0.203991	0.00539258
1	Deaths	168	Angola	3	Both	27	Age-standardized	627	Rheumatoid arthritis	3	Rate	1994	0.0646625	0.640487	0.0179077
1	Deaths	145	Kuwait	3	Both	22	All ages	627	Rheumatoid arthritis	1	Number	1991	0.310252	0.390564	0.237871
1	Deaths	145	Kuwait	3	Both	22	All ages	627	Rheumatoid arthritis	2	Percent	1991	5.29349e-05	6.59457e-05	4.00704e-05
1	Deaths	145	Kuwait	3	Both	22	All ages	627	Rheumatoid arthritis	3	Rate	1991	0.0182512	0.0229757	0.0139932
1	Deaths	145	Kuwait	3	Both	27	Age-standardized	627	Rheumatoid arthritis	3	Rate	1991	0.0557849	0.0689944	0.0432425
1	Deaths	53	Serbia	3	Both	22	All ages	627	Rheumatoid arthritis	1	Number	1990	32.7308	44.3125	23.9741
1	Deaths	53	Serbia	3	Both	22	All ages	627	Rheumatoid arthritis	2	Percent	1990	0.00031714	0.000429549	0.000233263
1	Deaths	53	Serbia	3	Both	22	All ages	627	Rheumatoid arthritis	3	Rate	1990	0.339899	0.460172	0.248964
1	Deaths	53	Serbia	3	Both	27	Age-standardized	627	Rheumatoid arthritis	3	Rate	1990	0.335994	0.448944	0.248989
1	Deaths	184	Mozambique	3	Both	22	All ages	627	Rheumatoid arthritis	1	Number	1990	2.14128	19.6311	0.625325
1	Deaths	184	Mozambique	3	Both	22	All ages	627	Rheumatoid arthritis	2	Percent	1990	9.83224e-06	9.10185e-05	2.87621e-06
1	Deaths	184	Mozambique	3	Both	22	All ages	627	Rheumatoid arthritis	3	Rate	1990	0.0160276	0.14694	0.00468059
1	Deaths	184	Mozambique	3	Both	27	Age-standardized	627	Rheumatoid arthritis	3	Rate	1990	0.0432275	0.3884	0.0128228
1	Deaths	170	Congo	3	Both	22	All ages	627	Rheumatoid arthritis	1	Number	1994	0.8458	8.54038	0.287419
1	Deaths	170	Congo	3	Both	22	All ages	627	Rheumatoid arthritis	2	Percent	1994	2.45941e-05	0.000253738	8.46348e-06
1	Deaths	170	Congo	3	Both	22	All ages	627	Rheumatoid arthritis	3	Rate	1994	0.0314201	0.317262	0.0106771
1	Deaths	170	Congo	3	Both	27	Age-standardized	627	Rheumatoid arthritis	3	Rate	1994	0.0839814	0.829269	0.0280244
1	Deaths	95	United Kingdom	3	Both	22	All ages	627	Rheumatoid arthritis	1	Number	1991	1516.52	1569.1	1414.43
1	Deaths	95	United Kingdom	3	Both	22	All ages	627	Rheumatoid arthritis	2	Percent	1991	0.00236303	0.00244447	0.00220084
1	Deaths	95	United Kingdom	3	Both	22	All ages	627	Rheumatoid arthritis	3	Rate	1991	2.63851	2.72999	2.46089
1	Deaths	95	United Kingdom	3	Both	27	Age-standardized	627	Rheumatoid arthritis	3	Rate	1991	1.55949	1.61321	1.45773
1	Deaths	168	Angola	3	Both	22	All ages	627	Rheumatoid arthritis	1	Number	1990	2.0677	20.9211	0.58047
1	Deaths	168	Angola	3	Both	22	All ages	627	Rheumatoid arthritis	2	Percent	1990	1.20351e-05	0.000123788	3.57572e-06
1	Deaths	168	Angola	3	Both	22	All ages	627	Rheumatoid arthritis	3	Rate	1990	0.0201211	0.203587	0.00564864
1	Deaths	168	Angola	3	Both	27	Age-standardized	627	Rheumatoid arthritis	3	Rate	1990	0.0648896	0.635509	0.0181056
1	Deaths	147	Libya	3	Both	22	All ages	627	Rheumatoid arthritis	1	Number	1991	1.05468	1.54967	0.697767
1	Deaths	147	Libya	3	Both	22	All ages	627	Rheumatoid arthritis	2	Percent	1991	5.75844e-05	8.22733e-05	3.99148e-05
1	Deaths	147	Libya	3	Both	22	All ages	627	Rheumatoid arthritis	3	Rate	1991	0.0246837	0.0362683	0.0163305
1	Deaths	147	Libya	3	Both	27	Age-standardized	627	Rheumatoid arthritis	3	Rate	1991	0.0527597	0.0800845	0.0346945
1	Deaths	157	Yemen	3	Both	22	All ages	627	Rheumatoid arthritis	1	Number	1992	3.83732	6.39616	2.26819
1	Deaths	157	Yemen	3	Both	22	All ages	627	Rheumatoid arthritis	2	Percent	1992	2.59201e-05	4.22293e-05	1.58144e-05
1	Deaths	157	Yemen	3	Both	22	All ages	627	Rheumatoid arthritis	3	Rate	1992	0.0262946	0.0438285	0.0155424
1	Deaths	157	Yemen	3	Both	27	Age-standardized	627	Rheumatoid arthritis	3	Rate	1992	0.0755776	0.129664	0.0439576
1	Deaths	128	Guatemala	3	Both	22	All ages	627	Rheumatoid arthritis	1	Number	1991	22.1008	24.1228	20.4289
1	Deaths	128	Guatemala	3	Both	22	All ages	627	Rheumatoid arthritis	2	Percent	1991	0.00030895	0.00033803	0.000283503
1	Deaths	128	Guatemala	3	Both	22	All ages	627	Rheumatoid arthritis	3	Rate	1991	0.256154	0.27959	0.236777
1	Deaths	128	Guatemala	3	Both	27	Age-standardized	627	Rheumatoid arthritis	3	Rate	1991	0.753075	0.8115	0.693271
1	Deaths	58	Estonia	3	Both	22	All ages	627	Rheumatoid arthritis	1	Number	1990	15.6871	17.9113	13.7708
1	Deaths	58	Estonia	3	Both	22	All ages	627	Rheumatoid arthritis	2	Percent	1990	0.000813314	0.000924532	0.000715291
1	Deaths	58	Estonia	3	Both	22	All ages	627	Rheumatoid arthritis	3	Rate	1990	1.00013	1.14194	0.877962
1	Deaths	58	Estonia	3	Both	27	Age-standardized	627	Rheumatoid arthritis	3	Rate	1990	0.7755	0.881008	0.68066
1	Deaths	91	Portugal	3	Both	22	All ages	627	Rheumatoid arthritis	1	Number	1990	73.3435	79.506	66.919
1	Deaths	91	Portugal	3	Both	22	All ages	627	Rheumatoid arthritis	2	Percent	1990	0.000724553	0.000783522	0.00066068
1	Deaths	91	Portugal	3	Both	22	All ages	627	Rheumatoid arthritis	3	Rate	1990	0.723516	0.784309	0.660141
1	Deaths	91	Portugal	3	Both	27	Age-standardized	627	Rheumatoid arthritis	3	Rate	1990	0.540167	0.581914	0.494793
1	Deaths	367	Monaco	3	Both	22	All ages	627	Rheumatoid arthritis	1	Number	1990	0.020621	0.0302846	0.0134705
1	Deaths	367	Monaco	3	Both	22	All ages	627	Rheumatoid arthritis	2	Percent	1990	4.7165e-05	6.60757e-05	3.29382e-05
1	Deaths	367	Monaco	3	Both	22	All ages	627	Rheumatoid arthritis	3	Rate	1990	0.0678033	0.0995777	0.044292
1	Deaths	367	Monaco	3	Both	27	Age-standardized	627	Rheumatoid arthritis	3	Rate	1990	0.0261837	0.0376335	0.0171969
1	Deaths	114	Haiti	3	Both	27	Age-standardized	627	Rheumatoid arthritis	3	Rate	1991	0.803555	1.27971	0.477332
1	Deaths	25	Micronesia (Federated States of)	3	Both	22	All ages	627	Rheumatoid arthritis	1	Number	1992	0.00102079	0.00283024	0.000500942
1	Deaths	25	Micronesia (Federated States of)	3	Both	22	All ages	627	Rheumatoid arthritis	2	Percent	1992	1.26792e-06	3.38383e-06	6.57236e-07
1	Deaths	25	Micronesia (Federated States of)	3	Both	22	All ages	627	Rheumatoid arthritis	3	Rate	1992	0.00096429	0.00267359	0.000473216
1	Deaths	25	Micronesia (Federated States of)	3	Both	27	Age-standardized	627	Rheumatoid arthritis	3	Rate	1992	0.00203808	0.00581654	0.000998109
1	Deaths	14	Maldives	3	Both	22	All ages	627	Rheumatoid arthritis	1	Number	1991	0.261857	0.392681	0.189972
1	Deaths	14	Maldives	3	Both	22	All ages	627	Rheumatoid arthritis	2	Percent	1991	0.000187063	0.000285891	0.000134199
1	Deaths	14	Maldives	3	Both	22	All ages	627	Rheumatoid arthritis	3	Rate	1991	0.114244	0.171319	0.0828815
1	Deaths	14	Maldives	3	Both	27	Age-standardized	627	Rheumatoid arthritis	3	Rate	1991	0.331751	0.452296	0.253441
1	Deaths	47	Czechia	3	Both	22	All ages	627	Rheumatoid arthritis	1	Number	1991	31.294	34.5374	28.0381
1	Deaths	47	Czechia	3	Both	22	All ages	627	Rheumatoid arthritis	2	Percent	1991	0.000251595	0.000277273	0.000225413
1	Deaths	47	Czechia	3	Both	22	All ages	627	Rheumatoid arthritis	3	Rate	1991	0.304025	0.335535	0.272394
1	Deaths	47	Czechia	3	Both	27	Age-standardized	627	Rheumatoid arthritis	3	Rate	1991	0.223017	0.247314	0.198751
1	Deaths	214	Nigeria	3	Both	22	All ages	627	Rheumatoid arthritis	1	Number	1991	2.72568	4.63639	1.41749
1	Deaths	214	Nigeria	3	Both	22	All ages	627	Rheumatoid arthritis	2	Percent	1991	1.99686e-06	3.31126e-06	1.06713e-06
1	Deaths	214	Nigeria	3	Both	22	All ages	627	Rheumatoid arthritis	3	Rate	1991	0.00293984	0.00500067	0.00152886
1	Deaths	214	Nigeria	3	Both	27	Age-standardized	627	Rheumatoid arthritis	3	Rate	1991	0.0073607	0.0123233	0.00392568
1	Deaths	217	Sierra Leone	3	Both	22	All ages	627	Rheumatoid arthritis	1	Number	1992	0.147585	0.271712	0.0646486
1	Deaths	217	Sierra Leone	3	Both	22	All ages	627	Rheumatoid arthritis	2	Percent	1992	1.96799e-06	3.63062e-06	8.6483e-07
1	Deaths	217	Sierra Leone	3	Both	22	All ages	627	Rheumatoid arthritis	3	Rate	1992	0.00354137	0.00651986	0.00155127
1	Deaths	217	Sierra Leone	3	Both	27	Age-standardized	627	Rheumatoid arthritis	3	Rate	1992	0.00745017	0.0137939	0.00325618
1	Deaths	202	Cameroon	3	Both	22	All ages	627	Rheumatoid arthritis	1	Number	1990	0.316712	0.592243	0.121278
1	Deaths	202	Cameroon	3	Both	22	All ages	627	Rheumatoid arthritis	2	Percent	1990	2.68335e-06	5.14347e-06	1.01185e-06
1	Deaths	202	Cameroon	3	Both	22	All ages	627	Rheumatoid arthritis	3	Rate	1990	0.00303454	0.00567452	0.00116201
1	Deaths	202	Cameroon	3	Both	27	Age-standardized	627	Rheumatoid arthritis	3	Rate	1990	0.0102569	0.0186657	0.00406529
1	Deaths	88	Malta	3	Both	22	All ages	627	Rheumatoid arthritis	1	Number	1992	1.78537	1.94985	1.61114
1	Deaths	88	Malta	3	Both	22	All ages	627	Rheumatoid arthritis	2	Percent	1992	0.000657207	0.000711076	0.000604314
1	Deaths	88	Malta	3	Both	22	All ages	627	Rheumatoid arthritis	3	Rate	1992	0.473076	0.51666	0.426911
1	Deaths	88	Malta	3	Both	27	Age-standardized	627	Rheumatoid arthritis	3	Rate	1992	0.407232	0.444665	0.366511
1	Deaths	135	Brazil	3	Both	22	All ages	627	Rheumatoid arthritis	1	Number	1990	232.834	244.898	219.409
1	Deaths	135	Brazil	3	Both	22	All ages	627	Rheumatoid arthritis	2	Percent	1990	0.000265908	0.00028114	0.00024999
1	Deaths	135	Brazil	3	Both	22	All ages	627	Rheumatoid arthritis	3	Rate	1990	0.156781	0.164905	0.147741
1	Deaths	135	Brazil	3	Both	27	Age-standardized	627	Rheumatoid arthritis	3	Rate	1990	0.272461	0.287465	0.253543
1	Deaths	177	Djibouti	3	Both	22	All ages	627	Rheumatoid arthritis	1	Number	1991	0.0372376	0.320064	0.010715
1	Deaths	177	Djibouti	3	Both	22	All ages	627	Rheumatoid arthritis	2	Percent	1991	1.04343e-05	9.36446e-05	3.00592e-06
1	Deaths	177	Djibouti	3	Both	22	All ages	627	Rheumatoid arthritis	3	Rate	1991	0.0079971	0.0687365	0.00230115
1	Deaths	177	Djibouti	3	Both	27	Age-standardized	627	Rheumatoid arthritis	3	Rate	1991	0.0336275	0.293855	0.00916454
1	Deaths	210	Liberia	3	Both	27	Age-standardized	627	Rheumatoid arthritis	3	Rate	1991	0.00885205	0.0170193	0.00389719
1	Deaths	23	Kiribati	3	Both	22	All ages	627	Rheumatoid arthritis	1	Number	1990	0.000276205	0.000436416	6.41382e-05
1	Deaths	23	Kiribati	3	Both	22	All ages	627	Rheumatoid arthritis	2	Percent	1990	3.64368e-07	5.43969e-07	8.51262e-08
1	Deaths	23	Kiribati	3	Both	22	All ages	627	Rheumatoid arthritis	3	Rate	1990	0.000371211	0.00058653	8.61997e-05
1	Deaths	23	Kiribati	3	Both	27	Age-standardized	627	Rheumatoid arthritis	3	Rate	1990	0.000761464	0.00117422	0.000152545
1	Deaths	23	Kiribati	3	Both	22	All ages	627	Rheumatoid arthritis	1	Number	1992	0.000282762	0.000431705	6.14812e-05
1	Deaths	23	Kiribati	3	Both	22	All ages	627	Rheumatoid arthritis	2	Percent	1992	3.69852e-07	5.38368e-07	8.07004e-08
1	Deaths	23	Kiribati	3	Both	22	All ages	627	Rheumatoid arthritis	3	Rate	1992	0.00036775	0.000561459	7.99601e-05
1	Deaths	23	Kiribati	3	Both	27	Age-standardized	627	Rheumatoid arthritis	3	Rate	1992	0.000758259	0.00113936	0.000143327
1	Deaths	153	Syrian Arab Republic	3	Both	22	All ages	627	Rheumatoid arthritis	1	Number	1990	4.14448	5.53417	2.78238
1	Deaths	153	Syrian Arab Republic	3	Both	22	All ages	627	Rheumatoid arthritis	2	Percent	1990	6.01076e-05	7.64112e-05	4.30079e-05
1	Deaths	153	Syrian Arab Republic	3	Both	22	All ages	627	Rheumatoid arthritis	3	Rate	1990	0.0325887	0.0435161	0.0218783
1	Deaths	153	Syrian Arab Republic	3	Both	27	Age-standardized	627	Rheumatoid arthritis	3	Rate	1990	0.0716619	0.0987893	0.0467595
1	Deaths	121	Bolivia (Plurinational State of)	3	Both	22	All ages	627	Rheumatoid arthritis	1	Number	1992	30.555	41.2275	23.3725
1	Deaths	121	Bolivia (Plurinational State of)	3	Both	22	All ages	627	Rheumatoid arthritis	2	Percent	1992	0.000509048	0.000701249	0.00038938
1	Deaths	121	Bolivia (Plurinational State of)	3	Both	22	All ages	627	Rheumatoid arthritis	3	Rate	1992	0.456114	0.615429	0.348896
1	Deaths	121	Bolivia (Plurinational State of)	3	Both	27	Age-standardized	627	Rheumatoid arthritis	3	Rate	1992	1.24434	1.60649	0.937993
1	Deaths	106	Bahamas	3	Both	22	All ages	627	Rheumatoid arthritis	1	Number	1994	0.843116	0.987673	0.733077
1	Deaths	106	Bahamas	3	Both	22	All ages	627	Rheumatoid arthritis	2	Percent	1994	0.000501577	0.000576491	0.000442893
1	Deaths	106	Bahamas	3	Both	22	All ages	627	Rheumatoid arthritis	3	Rate	1994	0.303163	0.355142	0.263595
1	Deaths	106	Bahamas	3	Both	27	Age-standardized	627	Rheumatoid arthritis	3	Rate	1994	0.559454	0.656362	0.482571
1	Deaths	121	Bolivia (Plurinational State of)	3	Both	22	All ages	627	Rheumatoid arthritis	1	Number	1994	32.6692	44.4321	24.4985
1	Deaths	121	Bolivia (Plurinational State of)	3	Both	22	All ages	627	Rheumatoid arthritis	2	Percent	1994	0.000553426	0.000756555	0.000425094
1	Deaths	121	Bolivia (Plurinational State of)	3	Both	22	All ages	627	Rheumatoid arthritis	3	Rate	1994	0.462577	0.629133	0.346884
1	Deaths	121	Bolivia (Plurinational State of)	3	Both	27	Age-standardized	627	Rheumatoid arthritis	3	Rate	1994	1.23145	1.62616	0.918375
1	Deaths	25	Micronesia (Federated States of)	3	Both	22	All ages	627	Rheumatoid arthritis	1	Number	1994	0.00102771	0.00273471	0.00052053
1	Deaths	25	Micronesia (Federated States of)	3	Both	22	All ages	627	Rheumatoid arthritis	2	Percent	1994	1.28506e-06	3.26284e-06	6.85325e-07
1	Deaths	25	Micronesia (Federated States of)	3	Both	22	All ages	627	Rheumatoid arthritis	3	Rate	1994	0.000954834	0.00254079	0.000483618
1	Deaths	25	Micronesia (Federated States of)	3	Both	27	Age-standardized	627	Rheumatoid arthritis	3	Rate	1994	0.00203771	0.00563662	0.00100801
1	Deaths	136	Paraguay	3	Both	22	All ages	627	Rheumatoid arthritis	1	Number	1990	7.86581	10.5076	6.22073
1	Deaths	136	Paraguay	3	Both	22	All ages	627	Rheumatoid arthritis	2	Percent	1990	0.00046112	0.000599596	0.000369666
1	Deaths	136	Paraguay	3	Both	22	All ages	627	Rheumatoid arthritis	3	Rate	1990	0.19457	0.259917	0.153877
1	Deaths	136	Paraguay	3	Both	27	Age-standardized	627	Rheumatoid arthritis	3	Rate	1990	0.346652	0.462066	0.271719
1	Deaths	38	Mongolia	3	Both	22	All ages	627	Rheumatoid arthritis	1	Number	1990	1.75953	5.31844	0.984437
1	Deaths	38	Mongolia	3	Both	22	All ages	627	Rheumatoid arthritis	2	Percent	1990	9.57708e-05	0.000292996	5.33046e-05
1	Deaths	38	Mongolia	3	Both	22	All ages	627	Rheumatoid arthritis	3	Rate	1990	0.0815417	0.246472	0.0456217
1	Deaths	38	Mongolia	3	Both	27	Age-standardized	627	Rheumatoid arthritis	3	Rate	1990	0.197222	0.585656	0.107415
1	Deaths	170	Congo	3	Both	22	All ages	627	Rheumatoid arthritis	1	Number	1990	0.75274	7.40453	0.264876
1	Deaths	170	Congo	3	Both	22	All ages	627	Rheumatoid arthritis	2	Percent	1990	2.61655e-05	0.000259574	9.45836e-06
1	Deaths	170	Congo	3	Both	22	All ages	627	Rheumatoid arthritis	3	Rate	1990	0.0313409	0.308293	0.0110283
1	Deaths	170	Congo	3	Both	27	Age-standardized	627	Rheumatoid arthritis	3	Rate	1990	0.0845379	0.835732	0.0285051
1	Deaths	374	Niue	3	Both	22	All ages	627	Rheumatoid arthritis	1	Number	1990	2.81493e-05	8.66604e-05	1.44051e-05
1	Deaths	374	Niue	3	Both	22	All ages	627	Rheumatoid arthritis	2	Percent	1990	1.08865e-06	3.50521e-06	5.86441e-07
1	Deaths	374	Niue	3	Both	22	All ages	627	Rheumatoid arthritis	3	Rate	1990	0.00121994	0.00375572	0.000624295
1	Deaths	374	Niue	3	Both	27	Age-standardized	627	Rheumatoid arthritis	3	Rate	1990	0.00124565	0.00381845	0.000635542
1	Deaths	351	Guam	3	Both	22	All ages	627	Rheumatoid arthritis	1	Number	1991	0.000689067	0.000976932	0.000485406
1	Deaths	351	Guam	3	Both	22	All ages	627	Rheumatoid arthritis	2	Percent	1991	1.20007e-06	1.72548e-06	8.58696e-07
1	Deaths	351	Guam	3	Both	22	All ages	627	Rheumatoid arthritis	3	Rate	1991	0.00049306	0.000699041	0.000347331
1	Deaths	351	Guam	3	Both	27	Age-standardized	627	Rheumatoid arthritis	3	Rate	1991	0.000902079	0.00125946	0.000637592
1	Deaths	179	Ethiopia	3	Both	22	All ages	627	Rheumatoid arthritis	1	Number	1991	8.67268	70.3422	2.92046
1	Deaths	179	Ethiopia	3	Both	22	All ages	627	Rheumatoid arthritis	2	Percent	1991	9.63777e-06	7.83104e-05	3.29683e-06
1	Deaths	179	Ethiopia	3	Both	22	All ages	627	Rheumatoid arthritis	3	Rate	1991	0.0164743	0.133619	0.00554758
1	Deaths	179	Ethiopia	3	Both	27	Age-standardized	627	Rheumatoid arthritis	3	Rate	1991	0.0510838	0.416247	0.0165885
1	Deaths	374	Niue	3	Both	22	All ages	627	Rheumatoid arthritis	1	Number	1992	2.78918e-05	8.60492e-05	1.45845e-05
1	Deaths	374	Niue	3	Both	22	All ages	627	Rheumatoid arthritis	2	Percent	1992	1.08717e-06	3.41251e-06	5.85915e-07
1	Deaths	374	Niue	3	Both	22	All ages	627	Rheumatoid arthritis	3	Rate	1992	0.00124145	0.00383001	0.000649147
1	Deaths	374	Niue	3	Both	27	Age-standardized	627	Rheumatoid arthritis	3	Rate	1992	0.00125164	0.00390367	0.000650744
1	Deaths	178	Eritrea	3	Both	22	All ages	627	Rheumatoid arthritis	1	Number	1991	0.377587	3.18189	0.109502
1	Deaths	178	Eritrea	3	Both	22	All ages	627	Rheumatoid arthritis	2	Percent	1991	6.91654e-06	6.12012e-05	2.04036e-06
1	Deaths	178	Eritrea	3	Both	22	All ages	627	Rheumatoid arthritis	3	Rate	1991	0.0112741	0.0950053	0.00326954
1	Deaths	178	Eritrea	3	Both	27	Age-standardized	627	Rheumatoid arthritis	3	Rate	1991	0.0440032	0.394825	0.0123821
1	Deaths	37	Kyrgyzstan	3	Both	22	All ages	627	Rheumatoid arthritis	1	Number	1994	8.25827	9.6668	7.00926
1	Deaths	37	Kyrgyzstan	3	Both	22	All ages	627	Rheumatoid arthritis	2	Percent	1994	0.00021054	0.000247403	0.000179351
1	Deaths	37	Kyrgyzstan	3	Both	22	All ages	627	Rheumatoid arthritis	3	Rate	1994	0.174954	0.204794	0.148493
1	Deaths	37	Kyrgyzstan	3	Both	27	Age-standardized	627	Rheumatoid arthritis	3	Rate	1994	0.298679	0.356652	0.253112
1	Deaths	16	Philippines	3	Both	22	All ages	627	Rheumatoid arthritis	1	Number	1991	89.7306	106.212	55.8534
1	Deaths	16	Philippines	3	Both	22	All ages	627	Rheumatoid arthritis	2	Percent	1991	0.000249766	0.000293208	0.000155665
1	Deaths	16	Philippines	3	Both	22	All ages	627	Rheumatoid arthritis	3	Rate	1991	0.138982	0.164509	0.0865101
1	Deaths	16	Philippines	3	Both	27	Age-standardized	627	Rheumatoid arthritis	3	Rate	1991	0.415976	0.48507	0.240264
1	Deaths	8	Taiwan (Province of China)	3	Both	22	All ages	627	Rheumatoid arthritis	1	Number	1990	83.5522	88.382	78.338
1	Deaths	8	Taiwan (Province of China)	3	Both	22	All ages	627	Rheumatoid arthritis	2	Percent	1990	0.000805916	0.000852422	0.00075607
1	Deaths	8	Taiwan (Province of China)	3	Both	22	All ages	627	Rheumatoid arthritis	3	Rate	1990	0.409754	0.433439	0.384182
1	Deaths	8	Taiwan (Province of China)	3	Both	27	Age-standardized	627	Rheumatoid arthritis	3	Rate	1990	0.629672	0.667636	0.582439
1	Deaths	88	Malta	3	Both	22	All ages	627	Rheumatoid arthritis	1	Number	1994	1.57409	1.72604	1.41727
1	Deaths	88	Malta	3	Both	22	All ages	627	Rheumatoid arthritis	2	Percent	1994	0.000584409	0.000633466	0.000532701
1	Deaths	88	Malta	3	Both	22	All ages	627	Rheumatoid arthritis	3	Rate	1994	0.40992	0.449489	0.369079
1	Deaths	88	Malta	3	Both	27	Age-standardized	627	Rheumatoid arthritis	3	Rate	1994	0.33907	0.37303	0.303938
1	Deaths	139	Algeria	3	Both	22	All ages	627	Rheumatoid arthritis	1	Number	1992	7.38688	10.3513	4.92544
1	Deaths	139	Algeria	3	Both	22	All ages	627	Rheumatoid arthritis	2	Percent	1992	5.52717e-05	7.92537e-05	3.74408e-05
1	Deaths	139	Algeria	3	Both	22	All ages	627	Rheumatoid arthritis	3	Rate	1992	0.027776	0.0389229	0.0185206
1	Deaths	139	Algeria	3	Both	27	Age-standardized	627	Rheumatoid arthritis	3	Rate	1992	0.0546505	0.0779296	0.0360647
1	Deaths	55	Slovenia	3	Both	22	All ages	627	Rheumatoid arthritis	1	Number	1990	19.8106	21.7279	17.8302
1	Deaths	55	Slovenia	3	Both	22	All ages	627	Rheumatoid arthritis	2	Percent	1990	0.00109891	0.00120235	0.000988849
1	Deaths	55	Slovenia	3	Both	22	All ages	627	Rheumatoid arthritis	3	Rate	1990	1.00382	1.10097	0.903467
1	Deaths	55	Slovenia	3	Both	27	Age-standardized	627	Rheumatoid arthritis	3	Rate	1990	0.801438	0.878833	0.724925
1	Deaths	148	Morocco	3	Both	22	All ages	627	Rheumatoid arthritis	1	Number	1991	12.8308	28.0739	5.75714
1	Deaths	148	Morocco	3	Both	22	All ages	627	Rheumatoid arthritis	2	Percent	1991	7.02948e-05	0.000149023	3.24316e-05
1	Deaths	148	Morocco	3	Both	22	All ages	627	Rheumatoid arthritis	3	Rate	1991	0.0496859	0.108713	0.0222939
1	Deaths	148	Morocco	3	Both	27	Age-standardized	627	Rheumatoid arthritis	3	Rate	1991	0.0837329	0.183341	0.037442
1	Deaths	172	Equatorial Guinea	3	Both	22	All ages	627	Rheumatoid arthritis	1	Number	1992	0.133204	1.36043	0.0359984
1	Deaths	172	Equatorial Guinea	3	Both	22	All ages	627	Rheumatoid arthritis	2	Percent	1992	1.89483e-05	0.000195266	5.2417e-06
1	Deaths	172	Equatorial Guinea	3	Both	22	All ages	627	Rheumatoid arthritis	3	Rate	1992	0.0289941	0.29612	0.00783567
1	Deaths	172	Equatorial Guinea	3	Both	27	Age-standardized	627	Rheumatoid arthritis	3	Rate	1992	0.0778574	0.811276	0.0204655
1	Deaths	26	Papua New Guinea	3	Both	22	All ages	627	Rheumatoid arthritis	1	Number	1992	0.0265297	0.0845769	0.0108063
1	Deaths	26	Papua New Guinea	3	Both	22	All ages	627	Rheumatoid arthritis	2	Percent	1992	7.52487e-07	2.33404e-06	3.32356e-07
1	Deaths	26	Papua New Guinea	3	Both	22	All ages	627	Rheumatoid arthritis	3	Rate	1992	0.000611936	0.00195086	0.000249259
1	Deaths	26	Papua New Guinea	3	Both	27	Age-standardized	627	Rheumatoid arthritis	3	Rate	1992	0.00128342	0.00452471	0.000500885
1	Deaths	130	Mexico	3	Both	22	All ages	627	Rheumatoid arthritis	1	Number	1991	777.205	803.045	740.515
1	Deaths	130	Mexico	3	Both	22	All ages	627	Rheumatoid arthritis	2	Percent	1991	0.00173899	0.00181478	0.0016493
1	Deaths	130	Mexico	3	Both	22	All ages	627	Rheumatoid arthritis	3	Rate	1991	0.892346	0.922014	0.85022
1	Deaths	130	Mexico	3	Both	27	Age-standardized	627	Rheumatoid arthritis	3	Rate	1991	2.13398	2.20998	2.01901
1	Deaths	218	Togo	3	Both	22	All ages	627	Rheumatoid arthritis	1	Number	1990	0.0628682	0.115412	0.0281173
1	Deaths	218	Togo	3	Both	22	All ages	627	Rheumatoid arthritis	2	Percent	1990	1.61401e-06	2.98312e-06	7.10118e-07
1	Deaths	218	Togo	3	Both	22	All ages	627	Rheumatoid arthritis	3	Rate	1990	0.00172398	0.00316485	0.000771037
1	Deaths	218	Togo	3	Both	27	Age-standardized	627	Rheumatoid arthritis	3	Rate	1990	0.00722855	0.0129493	0.00322901
1	Deaths	180	Kenya	3	Both	22	All ages	627	Rheumatoid arthritis	1	Number	1991	2.19924	18.3197	0.744004
1	Deaths	180	Kenya	3	Both	22	All ages	627	Rheumatoid arthritis	2	Percent	1991	1.0806e-05	9.20826e-05	3.72616e-06
1	Deaths	180	Kenya	3	Both	22	All ages	627	Rheumatoid arthritis	3	Rate	1991	0.00920943	0.0767146	0.00311555
1	Deaths	180	Kenya	3	Both	27	Age-standardized	627	Rheumatoid arthritis	3	Rate	1991	0.0298104	0.248067	0.0100142
1	Deaths	35	Georgia	3	Both	22	All ages	627	Rheumatoid arthritis	1	Number	1991	0.621484	0.749961	0.509826
1	Deaths	35	Georgia	3	Both	22	All ages	627	Rheumatoid arthritis	2	Percent	1991	1.11287e-05	1.34283e-05	9.0672e-06
1	Deaths	35	Georgia	3	Both	22	All ages	627	Rheumatoid arthritis	3	Rate	1991	0.0113177	0.0136574	0.00928432
1	Deaths	35	Georgia	3	Both	27	Age-standardized	627	Rheumatoid arthritis	3	Rate	1991	0.0110592	0.0134259	0.00898964
1	Deaths	115	Jamaica	3	Both	22	All ages	627	Rheumatoid arthritis	1	Number	1991	5.01484	5.70619	4.20336
1	Deaths	115	Jamaica	3	Both	22	All ages	627	Rheumatoid arthritis	2	Percent	1991	0.000412422	0.000472089	0.000348017
1	Deaths	115	Jamaica	3	Both	22	All ages	627	Rheumatoid arthritis	3	Rate	1991	0.210296	0.239287	0.176267
1	Deaths	115	Jamaica	3	Both	27	Age-standardized	627	Rheumatoid arthritis	3	Rate	1991	0.265974	0.302612	0.223483
1	Deaths	121	Bolivia (Plurinational State of)	3	Both	22	All ages	627	Rheumatoid arthritis	1	Number	1990	28.4256	39.0226	21.7013
1	Deaths	121	Bolivia (Plurinational State of)	3	Both	22	All ages	627	Rheumatoid arthritis	2	Percent	1990	0.000472311	0.000648832	0.000358845
1	Deaths	121	Bolivia (Plurinational State of)	3	Both	22	All ages	627	Rheumatoid arthritis	3	Rate	1990	0.44547	0.611539	0.340089
1	Deaths	121	Bolivia (Plurinational State of)	3	Both	27	Age-standardized	627	Rheumatoid arthritis	3	Rate	1990	1.24259	1.62494	0.927489
1	Deaths	74	Andorra	3	Both	22	All ages	627	Rheumatoid arthritis	1	Number	1990	0.042625	0.0610795	0.0278001
1	Deaths	74	Andorra	3	Both	22	All ages	627	Rheumatoid arthritis	2	Percent	1990	0.000152363	0.000197374	0.000109955
1	Deaths	74	Andorra	3	Both	22	All ages	627	Rheumatoid arthritis	3	Rate	1990	0.0784095	0.112357	0.0511387
1	Deaths	74	Andorra	3	Both	27	Age-standardized	627	Rheumatoid arthritis	3	Rate	1990	0.0828482	0.118516	0.0545001
1	Deaths	90	Norway	3	Both	22	All ages	627	Rheumatoid arthritis	1	Number	1992	107.784	114.49	96.6979
1	Deaths	90	Norway	3	Both	22	All ages	627	Rheumatoid arthritis	2	Percent	1992	0.00237922	0.00253021	0.00213823
1	Deaths	90	Norway	3	Both	22	All ages	627	Rheumatoid arthritis	3	Rate	1992	2.51495	2.67143	2.25627
1	Deaths	90	Norway	3	Both	27	Age-standardized	627	Rheumatoid arthritis	3	Rate	1992	1.40362	1.48967	1.26727
1	Deaths	146	Lebanon	3	Both	22	All ages	627	Rheumatoid arthritis	1	Number	1991	2.17393	3.16835	1.41938
1	Deaths	146	Lebanon	3	Both	22	All ages	627	Rheumatoid arthritis	2	Percent	1991	0.00011484	0.000165622	8.01136e-05
1	Deaths	146	Lebanon	3	Both	22	All ages	627	Rheumatoid arthritis	3	Rate	1991	0.071422	0.104092	0.0466321
1	Deaths	146	Lebanon	3	Both	27	Age-standardized	627	Rheumatoid arthritis	3	Rate	1991	0.101006	0.146046	0.0662951
1	Deaths	169	Central African Republic	3	Both	22	All ages	627	Rheumatoid arthritis	1	Number	1990	0.772482	7.32935	0.227622
1	Deaths	169	Central African Republic	3	Both	22	All ages	627	Rheumatoid arthritis	2	Percent	1990	1.58927e-05	0.000154513	4.77725e-06
1	Deaths	169	Central African Republic	3	Both	22	All ages	627	Rheumatoid arthritis	3	Rate	1990	0.0282894	0.268411	0.00833585
1	Deaths	169	Central African Republic	3	Both	27	Age-standardized	627	Rheumatoid arthritis	3	Rate	1990	0.0846999	0.835865	0.0239707
1	Deaths	203	Cabo Verde	3	Both	22	All ages	627	Rheumatoid arthritis	1	Number	1990	0.0157195	0.0328799	0.00444912
1	Deaths	203	Cabo Verde	3	Both	22	All ages	627	Rheumatoid arthritis	2	Percent	1990	6.17378e-06	1.27598e-05	1.75126e-06
1	Deaths	203	Cabo Verde	3	Both	22	All ages	627	Rheumatoid arthritis	3	Rate	1990	0.00444294	0.00929313	0.00125749
1	Deaths	203	Cabo Verde	3	Both	27	Age-standardized	627	Rheumatoid arthritis	3	Rate	1990	0.00570454	0.0119064	0.00165281
1	Deaths	26	Papua New Guinea	3	Both	22	All ages	627	Rheumatoid arthritis	1	Number	1994	0.0276965	0.0860672	0.0114014
1	Deaths	26	Papua New Guinea	3	Both	22	All ages	627	Rheumatoid arthritis	2	Percent	1994	7.69446e-07	2.34425e-06	3.2954e-07
1	Deaths	26	Papua New Guinea	3	Both	22	All ages	627	Rheumatoid arthritis	3	Rate	1994	0.00060312	0.0018742	0.000248276
1	Deaths	26	Papua New Guinea	3	Both	27	Age-standardized	627	Rheumatoid arthritis	3	Rate	1994	0.00127204	0.00443216	0.000515278
1	Deaths	157	Yemen	3	Both	22	All ages	627	Rheumatoid arthritis	1	Number	1990	3.60227	6.03169	2.12087
1	Deaths	157	Yemen	3	Both	22	All ages	627	Rheumatoid arthritis	2	Percent	1990	2.44963e-05	3.96082e-05	1.47393e-05
1	Deaths	157	Yemen	3	Both	22	All ages	627	Rheumatoid arthritis	3	Rate	1990	0.0264203	0.0442386	0.0155552
1	Deaths	157	Yemen	3	Both	27	Age-standardized	627	Rheumatoid arthritis	3	Rate	1990	0.0760455	0.13224	0.0431595
1	Deaths	211	Mali	3	Both	22	All ages	627	Rheumatoid arthritis	1	Number	1991	0.304924	0.628402	0.120875
1	Deaths	211	Mali	3	Both	22	All ages	627	Rheumatoid arthritis	2	Percent	1991	1.93279e-06	3.89842e-06	7.45514e-07
1	Deaths	211	Mali	3	Both	22	All ages	627	Rheumatoid arthritis	3	Rate	1991	0.00345049	0.00711094	0.00136781
1	Deaths	211	Mali	3	Both	27	Age-standardized	627	Rheumatoid arthritis	3	Rate	1991	0.0112705	0.0223513	0.00444145
1	Deaths	163	India	3	Both	22	All ages	627	Rheumatoid arthritis	1	Number	1991	2997.79	4337.42	2075.99
1	Deaths	163	India	3	Both	22	All ages	627	Rheumatoid arthritis	2	Percent	1991	0.000380762	0.000556573	0.00026336
1	Deaths	163	India	3	Both	22	All ages	627	Rheumatoid arthritis	3	Rate	1991	0.345001	0.499173	0.238916
1	Deaths	163	India	3	Both	27	Age-standardized	627	Rheumatoid arthritis	3	Rate	1991	0.855061	1.27671	0.588715
1	Deaths	39	Tajikistan	3	Both	22	All ages	627	Rheumatoid arthritis	1	Number	1990	0.806097	1.70795	0.449269
1	Deaths	39	Tajikistan	3	Both	22	All ages	627	Rheumatoid arthritis	2	Percent	1990	1.9405e-05	4.01271e-05	1.09804e-05
1	Deaths	39	Tajikistan	3	Both	22	All ages	627	Rheumatoid arthritis	3	Rate	1990	0.0150139	0.0318113	0.00836783
1	Deaths	39	Tajikistan	3	Both	27	Age-standardized	627	Rheumatoid arthritis	3	Rate	1990	0.0317523	0.0679591	0.0173326
1	Deaths	123	Peru	3	Both	22	All ages	627	Rheumatoid arthritis	1	Number	1992	86.8377	109.539	62.4962
1	Deaths	123	Peru	3	Both	22	All ages	627	Rheumatoid arthritis	2	Percent	1992	0.000642198	0.000794948	0.000466963
1	Deaths	123	Peru	3	Both	22	All ages	627	Rheumatoid arthritis	3	Rate	1992	0.386515	0.487558	0.278171
1	Deaths	123	Peru	3	Both	27	Age-standardized	627	Rheumatoid arthritis	3	Rate	1992	0.76956	0.97915	0.546111
1	Deaths	110	Dominica	3	Both	22	All ages	627	Rheumatoid arthritis	1	Number	1992	0.3226	0.411289	0.237619
1	Deaths	110	Dominica	3	Both	22	All ages	627	Rheumatoid arthritis	2	Percent	1992	0.000579934	0.000725015	0.000427398
1	Deaths	110	Dominica	3	Both	22	All ages	627	Rheumatoid arthritis	3	Rate	1992	0.449672	0.573294	0.331217
1	Deaths	110	Dominica	3	Both	27	Age-standardized	627	Rheumatoid arthritis	3	Rate	1992	0.600279	0.761832	0.43985
1	Deaths	40	Turkmenistan	3	Both	22	All ages	627	Rheumatoid arthritis	1	Number	1994	0.152777	0.175687	0.134132
1	Deaths	40	Turkmenistan	3	Both	22	All ages	627	Rheumatoid arthritis	2	Percent	1994	4.93707e-06	5.66319e-06	4.28051e-06
1	Deaths	40	Turkmenistan	3	Both	22	All ages	627	Rheumatoid arthritis	3	Rate	1994	0.00385191	0.00442953	0.00338183
1	Deaths	40	Turkmenistan	3	Both	27	Age-standardized	627	Rheumatoid arthritis	3	Rate	1994	0.0090604	0.0104924	0.00785579
1	Deaths	422	United States Virgin Islands	3	Both	22	All ages	627	Rheumatoid arthritis	1	Number	1991	0.167794	0.223455	0.121729
1	Deaths	422	United States Virgin Islands	3	Both	22	All ages	627	Rheumatoid arthritis	2	Percent	1991	0.000258168	0.000333408	0.000189203
1	Deaths	422	United States Virgin Islands	3	Both	22	All ages	627	Rheumatoid arthritis	3	Rate	1991	0.157558	0.209824	0.114303
1	Deaths	422	United States Virgin Islands	3	Both	27	Age-standardized	627	Rheumatoid arthritis	3	Rate	1991	0.285332	0.378128	0.205409
1	Deaths	10	Cambodia	3	Both	22	All ages	627	Rheumatoid arthritis	1	Number	1992	13.2278	17.8293	7.77489
1	Deaths	10	Cambodia	3	Both	22	All ages	627	Rheumatoid arthritis	2	Percent	1992	0.000116055	0.000156451	6.99523e-05
1	Deaths	10	Cambodia	3	Both	22	All ages	627	Rheumatoid arthritis	3	Rate	1992	0.122225	0.164742	0.0718396
1	Deaths	10	Cambodia	3	Both	27	Age-standardized	627	Rheumatoid arthritis	3	Rate	1992	0.364427	0.501215	0.208172
1	Deaths	209	Guinea-Bissau	3	Both	22	All ages	627	Rheumatoid arthritis	1	Number	1992	0.0334682	0.0717208	0.0140862
1	Deaths	209	Guinea-Bissau	3	Both	22	All ages	627	Rheumatoid arthritis	2	Percent	1992	2.00228e-06	4.14411e-06	8.54469e-07
1	Deaths	209	Guinea-Bissau	3	Both	22	All ages	627	Rheumatoid arthritis	3	Rate	1992	0.00318204	0.00681896	0.00133926
1	Deaths	209	Guinea-Bissau	3	Both	27	Age-standardized	627	Rheumatoid arthritis	3	Rate	1992	0.0115611	0.0241297	0.0049753
1	Deaths	11	Indonesia	3	Both	22	All ages	627	Rheumatoid arthritis	1	Number	1990	84.4139	121.282	38.8487
1	Deaths	11	Indonesia	3	Both	22	All ages	627	Rheumatoid arthritis	2	Percent	1990	6.16875e-05	8.7747e-05	2.77175e-05
1	Deaths	11	Indonesia	3	Both	22	All ages	627	Rheumatoid arthritis	3	Rate	1990	0.0456332	0.0655638	0.0210012
1	Deaths	11	Indonesia	3	Both	27	Age-standardized	627	Rheumatoid arthritis	3	Rate	1990	0.112783	0.158085	0.0477764
1	Deaths	110	Dominica	3	Both	22	All ages	627	Rheumatoid arthritis	1	Number	1990	0.306973	0.384877	0.228123
1	Deaths	110	Dominica	3	Both	22	All ages	627	Rheumatoid arthritis	2	Percent	1990	0.000557958	0.00069248	0.000417854
1	Deaths	110	Dominica	3	Both	22	All ages	627	Rheumatoid arthritis	3	Rate	1990	0.423864	0.531432	0.314988
1	Deaths	110	Dominica	3	Both	27	Age-standardized	627	Rheumatoid arthritis	3	Rate	1990	0.586326	0.737295	0.428493
1	Deaths	48	Hungary	3	Both	22	All ages	627	Rheumatoid arthritis	1	Number	1991	95.8744	107.119	86.1059
1	Deaths	48	Hungary	3	Both	22	All ages	627	Rheumatoid arthritis	2	Percent	1991	0.000664286	0.000742018	0.000598124
1	Deaths	48	Hungary	3	Both	22	All ages	627	Rheumatoid arthritis	3	Rate	1991	0.923464	1.03177	0.829373
1	Deaths	48	Hungary	3	Both	27	Age-standardized	627	Rheumatoid arthritis	3	Rate	1991	0.641772	0.715182	0.580062
1	Deaths	15	Myanmar	3	Both	22	All ages	627	Rheumatoid arthritis	1	Number	1991	60.0711	81.622	35.7335
1	Deaths	15	Myanmar	3	Both	22	All ages	627	Rheumatoid arthritis	2	Percent	1991	0.000120235	0.000158627	7.70831e-05
1	Deaths	15	Myanmar	3	Both	22	All ages	627	Rheumatoid arthritis	3	Rate	1991	0.146665	0.199282	0.0872442
1	Deaths	15	Myanmar	3	Both	27	Age-standardized	627	Rheumatoid arthritis	3	Rate	1991	0.325697	0.443677	0.184284
1	Deaths	101	Canada	3	Both	22	All ages	627	Rheumatoid arthritis	1	Number	1991	219.475	241.689	196.467
1	Deaths	101	Canada	3	Both	22	All ages	627	Rheumatoid arthritis	2	Percent	1991	0.00113111	0.00124369	0.00101572
1	Deaths	101	Canada	3	Both	22	All ages	627	Rheumatoid arthritis	3	Rate	1991	0.793635	0.87396	0.710434
1	Deaths	101	Canada	3	Both	27	Age-standardized	627	Rheumatoid arthritis	3	Rate	1991	0.643324	0.706606	0.575621
1	Deaths	196	South Africa	3	Both	22	All ages	627	Rheumatoid arthritis	1	Number	1991	226.964	275.298	172.394
1	Deaths	196	South Africa	3	Both	22	All ages	627	Rheumatoid arthritis	2	Percent	1991	0.000766874	0.000917	0.000586679
1	Deaths	196	South Africa	3	Both	22	All ages	627	Rheumatoid arthritis	3	Rate	1991	0.599832	0.72757	0.45561
1	Deaths	196	South Africa	3	Both	27	Age-standardized	627	Rheumatoid arthritis	3	Rate	1991	1.06096	1.28745	0.790754
1	Deaths	41	Uzbekistan	3	Both	22	All ages	627	Rheumatoid arthritis	1	Number	1990	2.55699	4.99587	1.96529
1	Deaths	41	Uzbekistan	3	Both	22	All ages	627	Rheumatoid arthritis	2	Percent	1990	1.96289e-05	3.87183e-05	1.49283e-05
1	Deaths	41	Uzbekistan	3	Both	22	All ages	627	Rheumatoid arthritis	3	Rate	1990	0.0122	0.0238365	0.00937688
1	Deaths	41	Uzbekistan	3	Both	27	Age-standardized	627	Rheumatoid arthritis	3	Rate	1990	0.0304131	0.0613045	0.0228321
1	Deaths	113	Guyana	3	Both	22	All ages	627	Rheumatoid arthritis	1	Number	1991	0.0642049	0.0739353	0.0559954
1	Deaths	113	Guyana	3	Both	22	All ages	627	Rheumatoid arthritis	2	Percent	1991	1.06279e-05	1.21618e-05	9.37893e-06
1	Deaths	113	Guyana	3	Both	22	All ages	627	Rheumatoid arthritis	3	Rate	1991	0.00824333	0.00949262	0.0071893
1	Deaths	113	Guyana	3	Both	27	Age-standardized	627	Rheumatoid arthritis	3	Rate	1991	0.0206437	0.0238827	0.0178982
1	Deaths	204	Chad	3	Both	22	All ages	627	Rheumatoid arthritis	1	Number	1992	0.231823	0.471824	0.0980837
1	Deaths	204	Chad	3	Both	22	All ages	627	Rheumatoid arthritis	2	Percent	1992	2.22117e-06	4.50656e-06	9.45441e-07
1	Deaths	204	Chad	3	Both	22	All ages	627	Rheumatoid arthritis	3	Rate	1992	0.00361871	0.00736507	0.00153106
1	Deaths	204	Chad	3	Both	27	Age-standardized	627	Rheumatoid arthritis	3	Rate	1992	0.00849504	0.0170341	0.00368219
1	Deaths	55	Slovenia	3	Both	22	All ages	627	Rheumatoid arthritis	1	Number	1994	23.6891	25.9115	21.5184
1	Deaths	55	Slovenia	3	Both	22	All ages	627	Rheumatoid arthritis	2	Percent	1994	0.00122347	0.00132257	0.00111602
1	Deaths	55	Slovenia	3	Both	22	All ages	627	Rheumatoid arthritis	3	Rate	1994	1.19359	1.30556	1.08422
1	Deaths	55	Slovenia	3	Both	27	Age-standardized	627	Rheumatoid arthritis	3	Rate	1994	0.909362	0.991308	0.822505
1	Deaths	44	Bosnia and Herzegovina	3	Both	22	All ages	627	Rheumatoid arthritis	1	Number	1992	13.7922	18.8628	9.79468
1	Deaths	44	Bosnia and Herzegovina	3	Both	22	All ages	627	Rheumatoid arthritis	2	Percent	1992	0.000355329	0.000490757	0.000257615
1	Deaths	44	Bosnia and Herzegovina	3	Both	22	All ages	627	Rheumatoid arthritis	3	Rate	1992	0.306661	0.419405	0.217779
1	Deaths	44	Bosnia and Herzegovina	3	Both	27	Age-standardized	627	Rheumatoid arthritis	3	Rate	1992	0.354171	0.483077	0.249881
1	Deaths	12	Lao People's Democratic Republic	3	Both	22	All ages	627	Rheumatoid arthritis	1	Number	1992	6.19616	8.76308	3.62405
1	Deaths	12	Lao People's Democratic Republic	3	Both	22	All ages	627	Rheumatoid arthritis	2	Percent	1992	0.000101283	0.000137137	6.17733e-05
1	Deaths	12	Lao People's Democratic Republic	3	Both	22	All ages	627	Rheumatoid arthritis	3	Rate	1992	0.141095	0.199547	0.0825244
1	Deaths	12	Lao People's Democratic Republic	3	Both	27	Age-standardized	627	Rheumatoid arthritis	3	Rate	1992	0.374695	0.533591	0.210425
1	Deaths	7	Democratic People's Republic of Korea	3	Both	22	All ages	627	Rheumatoid arthritis	1	Number	1991	100.93	142.298	68.8648
1	Deaths	7	Democratic People's Republic of Korea	3	Both	22	All ages	627	Rheumatoid arthritis	2	Percent	1991	0.000680401	0.000860698	0.000522039
1	Deaths	7	Democratic People's Republic of Korea	3	Both	22	All ages	627	Rheumatoid arthritis	3	Rate	1991	0.482824	0.680719	0.329432
1	Deaths	7	Democratic People's Republic of Korea	3	Both	27	Age-standardized	627	Rheumatoid arthritis	3	Rate	1991	0.745514	1.0333	0.519105
1	Deaths	112	Grenada	3	Both	22	All ages	627	Rheumatoid arthritis	1	Number	1991	0.163133	0.196253	0.13388
1	Deaths	112	Grenada	3	Both	22	All ages	627	Rheumatoid arthritis	2	Percent	1991	0.000223161	0.000266679	0.000184532
1	Deaths	112	Grenada	3	Both	22	All ages	627	Rheumatoid arthritis	3	Rate	1991	0.186503	0.224367	0.153059
1	Deaths	112	Grenada	3	Both	27	Age-standardized	627	Rheumatoid arthritis	3	Rate	1991	0.196771	0.234017	0.16241
1	Deaths	189	United Republic of Tanzania	3	Both	22	All ages	627	Rheumatoid arthritis	1	Number	1992	3.75308	33.6201	1.2097
1	Deaths	189	United Republic of Tanzania	3	Both	22	All ages	627	Rheumatoid arthritis	2	Percent	1992	1.02525e-05	9.13958e-05	3.29003e-06
1	Deaths	189	United Republic of Tanzania	3	Both	22	All ages	627	Rheumatoid arthritis	3	Rate	1992	0.0136989	0.122715	0.00441546
1	Deaths	189	United Republic of Tanzania	3	Both	27	Age-standardized	627	Rheumatoid arthritis	3	Rate	1992	0.0378279	0.338026	0.0120715
1	Deaths	413	Tokelau	3	Both	22	All ages	627	Rheumatoid arthritis	1	Number	1991	1.85858e-05	6.65756e-05	8.94322e-06
1	Deaths	413	Tokelau	3	Both	22	All ages	627	Rheumatoid arthritis	2	Percent	1991	1.24722e-06	4.55604e-06	6.06357e-07
1	Deaths	413	Tokelau	3	Both	22	All ages	627	Rheumatoid arthritis	3	Rate	1991	0.00118417	0.00424177	0.000569805
1	Deaths	413	Tokelau	3	Both	27	Age-standardized	627	Rheumatoid arthritis	3	Rate	1991	0.00136963	0.00481389	0.000660383
1	Deaths	376	Northern Mariana Islands	3	Both	22	All ages	627	Rheumatoid arthritis	1	Number	1992	0.0021578	0.00395925	0.00133313
1	Deaths	376	Northern Mariana Islands	3	Both	22	All ages	627	Rheumatoid arthritis	2	Percent	1992	1.26209e-05	2.32117e-05	8.39282e-06
1	Deaths	376	Northern Mariana Islands	3	Both	22	All ages	627	Rheumatoid arthritis	3	Rate	1992	0.00451593	0.00828608	0.00279002
1	Deaths	376	Northern Mariana Islands	3	Both	27	Age-standardized	627	Rheumatoid arthritis	3	Rate	1992	0.00932403	0.0177515	0.00579676
1	Deaths	522	Sudan	3	Both	22	All ages	627	Rheumatoid arthritis	1	Number	1990	8.37355	15.1878	4.28395
1	Deaths	522	Sudan	3	Both	22	All ages	627	Rheumatoid arthritis	2	Percent	1990	3.53298e-05	6.19075e-05	1.89144e-05
1	Deaths	522	Sudan	3	Both	22	All ages	627	Rheumatoid arthritis	3	Rate	1990	0.0418232	0.0758581	0.0213969
1	Deaths	522	Sudan	3	Both	27	Age-standardized	627	Rheumatoid arthritis	3	Rate	1990	0.0859706	0.163931	0.0449321
1	Deaths	41	Uzbekistan	3	Both	22	All ages	627	Rheumatoid arthritis	1	Number	1992	15.9692	28.2091	12.6286
1	Deaths	41	Uzbekistan	3	Both	22	All ages	627	Rheumatoid arthritis	2	Percent	1992	0.000116344	0.000207267	9.16022e-05
1	Deaths	41	Uzbekistan	3	Both	22	All ages	627	Rheumatoid arthritis	3	Rate	1992	0.0729139	0.1288	0.057661
1	Deaths	41	Uzbekistan	3	Both	27	Age-standardized	627	Rheumatoid arthritis	3	Rate	1992	0.142193	0.25705	0.11251
1	Deaths	186	Seychelles	3	Both	22	All ages	627	Rheumatoid arthritis	1	Number	1990	0.0224141	0.0307805	0.0161029
1	Deaths	186	Seychelles	3	Both	22	All ages	627	Rheumatoid arthritis	2	Percent	1990	4.06743e-05	5.54326e-05	2.90187e-05
1	Deaths	186	Seychelles	3	Both	22	All ages	627	Rheumatoid arthritis	3	Rate	1990	0.0307594	0.0422408	0.0220984
1	Deaths	186	Seychelles	3	Both	27	Age-standardized	627	Rheumatoid arthritis	3	Rate	1990	0.0396844	0.0542635	0.0284994
1	Deaths	153	Syrian Arab Republic	3	Both	22	All ages	627	Rheumatoid arthritis	1	Number	1994	4.62432	6.09202	3.26238
1	Deaths	153	Syrian Arab Republic	3	Both	22	All ages	627	Rheumatoid arthritis	2	Percent	1994	6.74326e-05	8.35397e-05	5.01923e-05
1	Deaths	153	Syrian Arab Republic	3	Both	22	All ages	627	Rheumatoid arthritis	3	Rate	1994	0.0321741	0.0423858	0.0226983
1	Deaths	153	Syrian Arab Republic	3	Both	27	Age-standardized	627	Rheumatoid arthritis	3	Rate	1994	0.0748023	0.0973145	0.0509144
1	Deaths	75	Austria	3	Both	22	All ages	627	Rheumatoid arthritis	1	Number	1992	76.2315	84.6039	67.7788
1	Deaths	75	Austria	3	Both	22	All ages	627	Rheumatoid arthritis	2	Percent	1992	0.000922001	0.00102503	0.000821024
1	Deaths	75	Austria	3	Both	22	All ages	627	Rheumatoid arthritis	3	Rate	1992	0.974685	1.08173	0.866611
1	Deaths	75	Austria	3	Both	27	Age-standardized	627	Rheumatoid arthritis	3	Rate	1992	0.595986	0.657447	0.532627
1	Deaths	97	Argentina	3	Both	22	All ages	627	Rheumatoid arthritis	1	Number	1991	122.163	133.35	111.928
1	Deaths	97	Argentina	3	Both	22	All ages	627	Rheumatoid arthritis	2	Percent	1991	0.000480221	0.000523493	0.000440202
1	Deaths	97	Argentina	3	Both	22	All ages	627	Rheumatoid arthritis	3	Rate	1991	0.364549	0.397933	0.334005
1	Deaths	97	Argentina	3	Both	27	Age-standardized	627	Rheumatoid arthritis	3	Rate	1991	0.383201	0.418523	0.351235
1	Deaths	212	Mauritania	3	Both	22	All ages	627	Rheumatoid arthritis	1	Number	1991	0.0998066	0.204405	0.0392097
1	Deaths	212	Mauritania	3	Both	22	All ages	627	Rheumatoid arthritis	2	Percent	1991	4.70433e-06	9.67436e-06	1.84987e-06
1	Deaths	212	Mauritania	3	Both	22	All ages	627	Rheumatoid arthritis	3	Rate	1991	0.00473488	0.00969706	0.00186013
1	Deaths	212	Mauritania	3	Both	27	Age-standardized	627	Rheumatoid arthritis	3	Rate	1991	0.011079	0.0218994	0.00443785
1	Deaths	136	Paraguay	3	Both	22	All ages	627	Rheumatoid arthritis	1	Number	1994	9.77479	12.8011	7.82811
1	Deaths	136	Paraguay	3	Both	22	All ages	627	Rheumatoid arthritis	2	Percent	1994	0.000509813	0.00062886	0.000413363
1	Deaths	136	Paraguay	3	Both	22	All ages	627	Rheumatoid arthritis	3	Rate	1994	0.216907	0.284062	0.17371
1	Deaths	136	Paraguay	3	Both	27	Age-standardized	627	Rheumatoid arthritis	3	Rate	1994	0.37358	0.494681	0.295899
1	Deaths	80	France	3	Both	22	All ages	627	Rheumatoid arthritis	1	Number	1991	479.815	526.758	423.428
1	Deaths	80	France	3	Both	22	All ages	627	Rheumatoid arthritis	2	Percent	1991	0.000917526	0.00100596	0.000809408
1	Deaths	80	France	3	Both	22	All ages	627	Rheumatoid arthritis	3	Rate	1991	0.827534	0.908497	0.730284
1	Deaths	80	France	3	Both	27	Age-standardized	627	Rheumatoid arthritis	3	Rate	1991	0.531971	0.580717	0.475163
1	Deaths	12	Lao People's Democratic Republic	3	Both	22	All ages	627	Rheumatoid arthritis	1	Number	1994	6.57183	9.04953	3.82553
1	Deaths	12	Lao People's Democratic Republic	3	Both	22	All ages	627	Rheumatoid arthritis	2	Percent	1994	0.00010695	0.000144019	6.31436e-05
1	Deaths	12	Lao People's Democratic Republic	3	Both	22	All ages	627	Rheumatoid arthritis	3	Rate	1994	0.141212	0.194451	0.0822006
1	Deaths	12	Lao People's Democratic Republic	3	Both	27	Age-standardized	627	Rheumatoid arthritis	3	Rate	1994	0.375135	0.519844	0.20865
1	Deaths	172	Equatorial Guinea	3	Both	22	All ages	627	Rheumatoid arthritis	1	Number	1994	0.134503	1.40786	0.0351316
1	Deaths	172	Equatorial Guinea	3	Both	22	All ages	627	Rheumatoid arthritis	2	Percent	1994	1.82748e-05	0.000190894	4.91804e-06
1	Deaths	172	Equatorial Guinea	3	Both	22	All ages	627	Rheumatoid arthritis	3	Rate	1994	0.0268823	0.281381	0.00702154
1	Deaths	172	Equatorial Guinea	3	Both	27	Age-standardized	627	Rheumatoid arthritis	3	Rate	1994	0.0759751	0.784845	0.0196025
1	Deaths	57	Belarus	3	Both	22	All ages	627	Rheumatoid arthritis	1	Number	1992	2.93461	3.24178	2.66105
1	Deaths	57	Belarus	3	Both	22	All ages	627	Rheumatoid arthritis	2	Percent	1992	2.48616e-05	2.73441e-05	2.25529e-05
1	Deaths	57	Belarus	3	Both	22	All ages	627	Rheumatoid arthritis	3	Rate	1992	0.0279804	0.0309092	0.0253721
1	Deaths	57	Belarus	3	Both	27	Age-standardized	627	Rheumatoid arthritis	3	Rate	1992	0.0223341	0.0247115	0.0201849
1	Deaths	22	Fiji	3	Both	22	All ages	627	Rheumatoid arthritis	1	Number	1990	0.00130431	0.00438352	0.000768358
1	Deaths	22	Fiji	3	Both	22	All ages	627	Rheumatoid arthritis	2	Percent	1990	2.84854e-07	9.46026e-07	1.72657e-07
1	Deaths	22	Fiji	3	Both	22	All ages	627	Rheumatoid arthritis	3	Rate	1990	0.000171987	0.000578013	0.000101316
1	Deaths	22	Fiji	3	Both	27	Age-standardized	627	Rheumatoid arthritis	3	Rate	1990	0.000371383	0.0013367	0.00021278
1	Deaths	57	Belarus	3	Both	22	All ages	627	Rheumatoid arthritis	1	Number	1994	2.95254	3.27516	2.66099
1	Deaths	57	Belarus	3	Both	22	All ages	627	Rheumatoid arthritis	2	Percent	1994	2.26784e-05	2.51426e-05	2.049e-05
1	Deaths	57	Belarus	3	Both	22	All ages	627	Rheumatoid arthritis	3	Rate	1994	0.0281872	0.0312672	0.0254038
1	Deaths	57	Belarus	3	Both	27	Age-standardized	627	Rheumatoid arthritis	3	Rate	1994	0.0221167	0.0245222	0.0199612
1	Deaths	24	Marshall Islands	3	Both	22	All ages	627	Rheumatoid arthritis	1	Number	1992	0.000266579	0.00083021	0.000139843
1	Deaths	24	Marshall Islands	3	Both	22	All ages	627	Rheumatoid arthritis	2	Percent	1992	8.62148e-07	2.72505e-06	4.51005e-07
1	Deaths	24	Marshall Islands	3	Both	22	All ages	627	Rheumatoid arthritis	3	Rate	1992	0.000564119	0.00175684	0.000295928
1	Deaths	24	Marshall Islands	3	Both	27	Age-standardized	627	Rheumatoid arthritis	3	Rate	1992	0.00154923	0.00520305	0.000783932
1	Deaths	77	Cyprus	3	Both	22	All ages	627	Rheumatoid arthritis	1	Number	1990	12.4208	16.863	9.18907
1	Deaths	77	Cyprus	3	Both	22	All ages	627	Rheumatoid arthritis	2	Percent	1990	0.00192189	0.00260173	0.0014172
1	Deaths	77	Cyprus	3	Both	22	All ages	627	Rheumatoid arthritis	3	Rate	1990	1.5964	2.16734	1.18104
1	Deaths	77	Cyprus	3	Both	27	Age-standardized	627	Rheumatoid arthritis	3	Rate	1990	2.0064	2.75513	1.39814
1	Deaths	320	Cook Islands	3	Both	22	All ages	627	Rheumatoid arthritis	1	Number	1991	4.22359e-06	1.3942e-05	1.73526e-06
1	Deaths	320	Cook Islands	3	Both	22	All ages	627	Rheumatoid arthritis	2	Percent	1991	3.43943e-08	1.12779e-07	1.42602e-08
1	Deaths	320	Cook Islands	3	Both	22	All ages	627	Rheumatoid arthritis	3	Rate	1991	2.21626e-05	7.31582e-05	9.10549e-06
1	Deaths	320	Cook Islands	3	Both	27	Age-standardized	627	Rheumatoid arthritis	3	Rate	1991	2.85416e-05	9.11059e-05	1.21255e-05
1	Deaths	68	Republic of Korea	3	Both	22	All ages	627	Rheumatoid arthritis	1	Number	1991	179.002	227.234	140.334
1	Deaths	68	Republic of Korea	3	Both	22	All ages	627	Rheumatoid arthritis	2	Percent	1991	0.000746923	0.00094895	0.000584023
1	Deaths	68	Republic of Korea	3	Both	22	All ages	627	Rheumatoid arthritis	3	Rate	1991	0.401386	0.509538	0.314679
1	Deaths	68	Republic of Korea	3	Both	27	Age-standardized	627	Rheumatoid arthritis	3	Rate	1991	0.797087	1.00268	0.591747
1	Deaths	175	Burundi	3	Both	22	All ages	627	Rheumatoid arthritis	1	Number	1990	0.967072	8.38595	0.300462
1	Deaths	175	Burundi	3	Both	22	All ages	627	Rheumatoid arthritis	2	Percent	1990	1.02607e-05	8.96625e-05	3.18634e-06
1	Deaths	175	Burundi	3	Both	22	All ages	627	Rheumatoid arthritis	3	Rate	1990	0.0174142	0.151007	0.00541046
1	Deaths	175	Burundi	3	Both	27	Age-standardized	627	Rheumatoid arthritis	3	Rate	1990	0.0458012	0.398361	0.0142845
1	Deaths	172	Equatorial Guinea	3	Both	22	All ages	627	Rheumatoid arthritis	1	Number	1990	0.132441	1.33112	0.0371343
1	Deaths	172	Equatorial Guinea	3	Both	22	All ages	627	Rheumatoid arthritis	2	Percent	1990	1.96451e-05	0.000200835	5.60728e-06
1	Deaths	172	Equatorial Guinea	3	Both	22	All ages	627	Rheumatoid arthritis	3	Rate	1990	0.0313245	0.314832	0.00878287
1	Deaths	172	Equatorial Guinea	3	Both	27	Age-standardized	627	Rheumatoid arthritis	3	Rate	1990	0.0801518	0.804933	0.0220624
1	Deaths	106	Bahamas	3	Both	22	All ages	627	Rheumatoid arthritis	1	Number	1990	0.67105	0.778315	0.572666
1	Deaths	106	Bahamas	3	Both	22	All ages	627	Rheumatoid arthritis	2	Percent	1990	0.000475435	0.000547733	0.000404498
1	Deaths	106	Bahamas	3	Both	22	All ages	627	Rheumatoid arthritis	3	Rate	1990	0.261413	0.303199	0.223087
1	Deaths	106	Bahamas	3	Both	27	Age-standardized	627	Rheumatoid arthritis	3	Rate	1990	0.508153	0.5942	0.432129
[truncated: 115,939 more rows]

## Sheet: GBD
measure_id	measure_name	location_id	location_name	sex_id	sex_name	age_id	age_name	cause_id	cause_name	metric_id	metric_name	year	val	upper	lower
[truncated: 31,104 more rows]

[truncated: 4 more sheets: global, SDI, SDI1990-2021modified, sex]
